# Supplementary material
Source: PubMed Central journal article supplement (PMC3560418)

–Supporting Information for–

**Bare-Minimum Fluorous Mixture Synthesis of a Stereoisomer Library of 4,8,12-  
Trimethylnonadecanols and Predictions of NMR Spectra of Saturated Oligoisoprenoid  
Stereoisomers**

Edmund A.-H. Yeh, Eveline Kumli, Krishnan Damodaran and Dennis P. Curran

Department of Chemistry, University of Pittsburgh, Pittsburgh, Pennsylvania 15260

E-mail: curran@pitt.edu

**Table of Contents**

|                                                                          |    |
|--------------------------------------------------------------------------|----|
| General Information.....                                                 | 2  |
| General Procedures.....                                                  | 3  |
| Experimental Information and Data on Individual and Mixture Samples..... | 4  |
| Purified Products after Fluorous HPLC demixing.....                      | 18 |
| Final 4,8,12-Trimethylnonadecan-1-ol Samples.....                        | 21 |
| Spectral Predictions, Figures S1–S4.....                                 | 23 |
| Copies of NMR Spectra.....                                               | 29 |

## General information

All reactions were performed under argon atmosphere unless otherwise noted. All reaction solvents were freshly dried by passing through a column of activated alumina.<sup>43</sup> All reagents were purchased commercially and used without further purification unless otherwise mentioned. Reaction progresses were monitored by TLC with 0.25 mm E. Merck precoated silica gel plates. All crude mixtures were purified by flash chromatography with silica gel 60 (0.040–0.063 mm) supplied by Sorbent Technology unless otherwise stated. Products and reactions were analyzed by <sup>1</sup>H, <sup>13</sup>C, and <sup>19</sup>F NMR NMR spectrometry, FT-IR, optical rotation, and HRMS.

The NMR spectra were recorded on a Bruker Advance III 400 MHz, a Bruker Advance III 600 MHz, or a Bruker Advance III 700 MHz spectrometer using deuterated chloroform spiked with 1 mole% trimethylsilane (TMS), unless otherwise indicated. The signals are given as in part per million (d, ppm) and were determined relative to the proton and carbon resonance of TMS at 0 ppm as the internal standard. In the case of <sup>19</sup>F NMR NMR spectrometry, no internal standard was used. The spectral data of single molecules were reported in the following order: chemical shift (d), multiplicity, coupling constant (Hz), number of nuclei. The spectral data of mixtures (with the designation M- before number) were not reported, but copies of the spectra are provided.

Infrared (IR) spectra were taken on a Mattson Genesis FT-IR spectrometer as thin film on NaCl plate and the peaks are reported in wave numbers (cm<sup>-1</sup>). Optical rotations were measured on a Perkin-Elmer 241 polarimeter at a Na D-line ( $\lambda = 589$  nm) using a 1 dm cell. HPLC analyses and separations were performed on a Waters 600E system with a Waters 2487 dual  $\lambda$  absorption detector. Compound names were obtained from ChemDraw Ultra 12.0 (Cambridge Soft Corp.).

## General Procedures

**General Procedure 1: the synthesis of fluorinated phenyl chlorothionoformates (6a–g):** The corresponding fluorinated phenol in 1N aq. NaOH was added dropwise to a solution of thiophosgene in  $\text{CHCl}_3$ . The resulting mixture was stirred at 0 °C for 1.5 h. The reaction progress was monitored by TLC. After complete consumption of the starting phenol, the reaction was quenched by 1N HCl. The organic layer was dried over  $\text{MgSO}_4$  and then concentrated. The crude product was used in the next step without further purification.

**General Procedure 2: the Roush crotylboration reaction of aldehydes:** To a solution of Roush reagent (SS-8 or RR-8, 3 equiv) in toluene was added powdered 4 Å molecular sieves (20 mg/mL), and then cooled to –78 °C. After 10 min, the corresponding aldehyde was added neat to the mixture and the resulting solution was stirred at –78 °C for further 3 h. 2 N NaOH was added to quench the reaction over 20 min at 0 °C then filtered through a pad of celite. The aqueous layer was extracted with ether (10 mL, 3 times). The combined organic layer was dried with  $\text{K}_2\text{CO}_3$  and concentrated. The crude product was purified by column chromatography (9:1 hexane-diethyl ether).

**General Procedure 3: thionocarbonate formation (fluorous tagging):** To the allylic alcohol in  $\text{CH}_2\text{Cl}_2$  was added pyridine (anhydrous) at 25 °C. After 10 min, the reaction mixture was cooled to 0 °C. *O*-Phenyl chlorothionoformate (2 equiv) was added dropwise into the reaction mixture, which was slowly warmed to room temperature overnight (16 h). Aqueous  $\text{NH}_4\text{Cl}$  was added to quench the reaction at 0 °C followed by aqueous layer extraction with  $\text{CH}_2\text{Cl}_2$  (10 mL, 3 times). The combined organic layer was dried over  $\text{MgSO}_4$  and then concentrated. The crude product was purified by column chromatography (99:1 hexanes-diethyl ether).

**General procedure 4, Rh-catalyzed hydroformylation:** The pyridone ligand **12** (30 mol%)

and Rh(CO)<sub>2</sub>acac ( 7 mol%) were added to THF under Ar, and the resulting mixture was stirred at room temp. After 10 min, the corresponding alkene was added neat to the premixed catalysts in THF. The resulting mixture was transported to the pressure vessel and stirred at 60 °C under 150 psi of CO/H<sub>2</sub> for 15 h. After complete consumption of the starting alkene, the solvent was evaporated under reduced pressure and the crude mixture was purified by column chromatography (3:1 hexanes-diethyl ether).

**General Procedure 5: radical deoxygenation:** To a solution of triphenylthionocarbonate tagged trimethylnonadecanol and 5 equiv of dimethyl-imidazolium carbene-borane (diMe-Imd-BH<sub>3</sub>) in benzene-*d*<sub>6</sub> were added AIBN. The reaction mixture was heated at 80 °C. After 2 h, the solvent was evaporated and the residue was first extracted with hexanes (3 x 5 mL) then concentrated. The crude product was isolated by column chromatography (9:1) hexane-diethyl ether.

### Experimental Information and Data on Individual and Mixture Samples

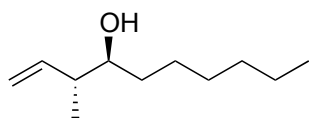

**(3*R*,4*S*)-3-Methyldec-1-en-4-ol (10):** This crotylation reaction was performed according to General Procedure 2 using heptanal (12 g, 105.1 mmol) and Roush reagent SS-**8** (315 ml, 315 mmol). Allylic alcohol (3*R*,4*S*)-**10** was isolated in 16 g, 89% yield as a colorless oil:  $[\alpha]_D^{25} = -0.66$  ( $c = 1.54$ , CHCl<sub>3</sub>); <sup>1</sup>H NMR (CDCl<sub>3</sub>, 300 MHz, ppm)  $\delta = 5.736$  (ddd,  $J = 8.4, 11.3, 16.7$  Hz, 1H), 5.096 (d,  $J = 11.0$  Hz, 1H), 5.087 (d,  $J = 16.8$  Hz, 1H), 3.375 (s br, 1H), 2.192 (ddq,  $J = 6.7, 6.8, 6.9$  Hz, 1H), 1.200–1.600 (m, 11H), 1.030 (d,  $J = 6.9$  Hz, 3H), 0.882 (t,  $J = 6.0$  Hz, 3H); <sup>13</sup>C NMR (CDCl<sub>3</sub>, 75 MHz, ppm)  $\delta = 140.40, 116.27, 74.70, 44.14, 34.26, 31.87, 29.42, 25.71, 22.66, 16.32, 14.11$ ; FTIR (thin film)  $\nu_{\max}$  3372, 3075, 2956, 2928, 2857, 1639, 1459, 999, 961, 912

$\text{cm}^{-1}$ ; HRMS calcd for  $\text{C}_{11}\text{H}_{22}\text{O}$ : 170.1668, found 170.1670.

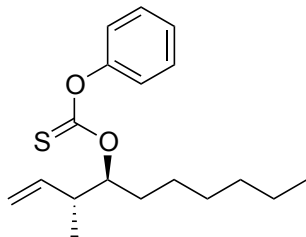

***O*-((3*R*,4*S*)-3-Methyldec-1-en-4-yl) *O*-phenyl carbonothioate (RS-11):** This acylation reaction was performed according to General Procedure 3 using (3*R*,4*S*)-3-methyldec-1-en-4-ol **10** (24 g, 141 mmol) and *O*-phenyl chlorothionoformate (24.3 g, 141 mmol). Alkene (3*R*,4*S*)-**11** was isolated in 34 g, 78% yield as a colorless oil:  $[\alpha]_{\text{D}}^{25} = -12.189$  ( $c = 2.33$ ,  $\text{CHCl}_3$ );  $^1\text{H}$  NMR ( $\text{CDCl}_3$ , 300 MHz, ppm)  $\delta = 7.415$  (t,  $J = 7.5$  Hz, 2H), 7.283 (t,  $J = 7.5$  Hz, 1H), 7.095 (d,  $J = 7.8$  Hz, 2H), 5.776 (ddd,  $J = 8.4, 11.3, 16.7$  Hz, 1H), 5.372 (dt,  $J = 4.5, 8.4$  Hz, 1H), 5.130 (d,  $J = 6.3$  Hz, 1H), 5.113 (d,  $J = 16.8$  Hz, 1H), 2.648 (ddq,  $J = 6.7, 6.8, 6.9$  Hz, 1H), 1.500-1.850 (m, 2H), 1.200- 1.500 (m, 8H), 1.099 (d,  $J = 6.9$  Hz, 3H), 0.891 (t,  $J = 6.0$  Hz, 3H);  $^{13}\text{C}$  NMR ( $\text{CDCl}_3$ , 75 MHz, ppm)  $\delta = 195.17, 153.38, 138.86, 129.45, 126.42, 122.03, 116.06, 88.59, 41.10, 31.69, 30.65, 29.17, 25.25, 22.59, 15.70, 14.08$ ; FTIR (thin film)  $\nu_{\text{max}}$  3076, 2956, 2928, 2857, 1592, 1490, 1276, 1197, 1002, 918, 768  $\text{cm}^{-1}$ ; HRMS calcd for  $\text{C}_{18}\text{H}_{26}\text{O}_2\text{S}$ : 306.1658, found 306.1653.

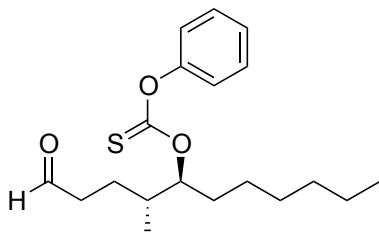

***O*-((4*R*,5*S*)-4-Methyl-1-oxoundecan-5-yl) *O*-phenyl carbonothioate (RS-13):** This Rh-catalyzed hydroformylation reaction was performed according to General Procedure 4 using *O*-((3*R*,4*S*)-3-methyldec-1-en-4-yl) *O*-phenyl carbonothioate RS-**11** (10 g, 330 mmol), pyridone ligand **12** (3.2 g, 100 mmol), and Rh catalyst (0.64 g, 20 mmol). Aldehyde RS-**13** was isolated in 9.3 g, 85% yield as a colorless oil:  $[\alpha]_{\text{D}}^{25} = -2.30$  ( $c = 1.87$ ,  $\text{CHCl}_3$ );  $^1\text{H}$  NMR ( $\text{CDCl}_3$ , 300

MHz, ppm)  $\delta$  = 9.799 (t,  $J$  = 1.2 Hz, 1H), 7.421 (t,  $J$  = 7.5 Hz, 2H), 7.315 (t,  $J$  = 7.5 Hz, 1H), 7.099 (d,  $J$  = 7.8 Hz, 2H), 5.320 (quint,  $J$  = 4.5 Hz, 1H), 2.476-2.593 (m, 2H), 2.008 (ddq,  $J$  = 6.7, 6.8, 6.9 Hz, 1H), 1.200-1.833 (m, 12H), 0.983 (d,  $J$  = 6.9 Hz, 3H), 0.898 (t,  $J$  = 6.0 Hz, 3H);  $^{13}\text{C}$  NMR ( $\text{CDCl}_3$ , 75 MHz, ppm)  $\delta$  = 201.94, 195.08, 153.34, 129.67, 129.49, 126.49, 122.00, 121.83, 88.98, 41.56, 35.32, 34.68, 31.70, 29.69, 29.22, 25.33, 24.19, 22.67, 22.60, 14.92, 14.15, 14.10; FTIR  $\nu_{\text{max}}$  2956, 2928, 2857, 2720, 1725, 1592, 1490, 1458, 1358, 1282, 1197, 1003, 770  $\text{cm}^{-1}$ ; HRMS calcd for  $\text{C}_{19}\text{H}_{28}\text{O}_3\text{SNa}$ : 359.1657, found 359.1672.

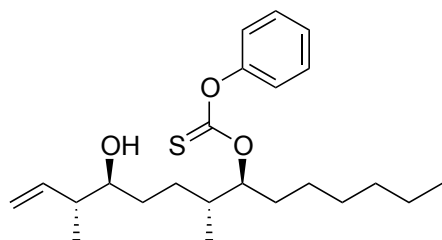

***O*-((7*S*,8*R*,11*S*,12*R*)-11-Hydroxy-8,12-dimethyltetradec-13-en-7-yl) *O*-phenyl carbonothioate (RSRS-14):**

This crotylation reaction was performed according to General Procedure 2 using aldehyde (4*R*,5*S*)-**13** (1.5 g, 4.46 mmol) and Roush reagent **SS-8** (8.9 ml, 8.9 mmol).

Allylic alcohol RSRS-14 was isolated in 1.46 g, 83% yield as a colorless oil:  $[\alpha]_{\text{D}}^{25} = -2.64$  ( $c = 1.67$ ,  $\text{CHCl}_3$ );  $^1\text{H}$  NMR ( $\text{CDCl}_3$ , 300 MHz, ppm)  $\delta$  = 7.413 (t,  $J$  = 7.5 Hz, 2H), 7.281 (t,  $J$  = 7.5 Hz, 1H), 7.102 (d,  $J$  = 7.8 Hz, 2H), 5.753 (ddd,  $J$  = 8.4, 11.3, 16.7 Hz, 1H), 5.347 (s br, 1H), 5.133 (d,  $J$  = 6.9 Hz, 1H), 5.120 (d,  $J$  = 17.1 Hz, 1H), 3.394 (s br, 1H), 2.217 (ddq,  $J$  = 6.7, 6.8, 6.9 Hz, 1H), 2.010 (s br, 1H), 1.200-1.800 (m, 14H), 1.043 (d,  $J$  = 6.9 Hz, 3H), 0.976 (d,  $J$  = 6.9 Hz, 3H), 0.896 (t,  $J$  = 6.0 Hz, 3H);  $^{13}\text{C}$  NMR ( $\text{CDCl}_3$ , 75 MHz, ppm)  $\delta$  = 195.07, 153.38, 140.25, 140.16, 129.43, 126.39, 122.04, 116.51, 116.47, 88.78, 88.53, 74.83, 74.57, 44.23, 44.16, 35.77, 31.71, 31.65, 29.59, 29.38, 29.23, 25.44, 25.38, 22.60, 16.36, 16.31, 15.06, 14.84, 14.08; FTIR  $\nu_{\text{max}}$  3443, 3072, 2957, 2928, 2859, 1592, 1490, 1458, 1369, 1283, 1197, 1002, 914, 769  $\text{cm}^{-1}$ ; HRMS calcd for  $\text{C}_{23}\text{H}_{36}\text{O}_3\text{SNa}$ : 415.2283, found 415.2260.

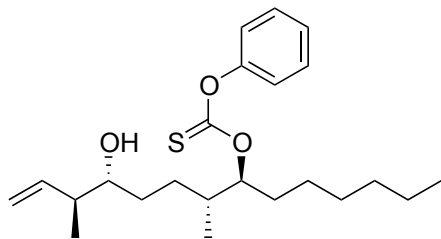

***O*-((7*S*,8*R*,11*R*,12*S*)-11-Hydroxy-8,12-dimethyltetradec-13-en-7-yl) *O*-phenyl carbonothioate (SRRS-14):**

This crotylation reaction was performed according to General Procedure 2 using aldehyde RS-13 (1.2 g, 3.5 mmol) and Roush reagent RR-8 (10.1 ml, 5.3 mmol). Allylic alcohol SRRS-14 was isolated in 1.2 g, 83% yield as a colorless oil:  $[\alpha]_D^{25} = -0.70$  ( $c = 1.62$ ,  $\text{CHCl}_3$ );  $^1\text{H NMR}$  ( $\text{CDCl}_3$ , 300 MHz, ppm)  $\delta = 7.410$  (t,  $J = 7.5$  Hz, 2H), 7.279 (t,  $J = 7.5$  Hz, 1H), 7.101 (d,  $J = 7.8$  Hz, 2H), 5.752 (ddd,  $J = 8.4, 11.3, 16.7$  Hz, 1H), 5.340 (s br, 1H), 5.129 (d,  $J = 6.9$  Hz, 1H), 5.118 (d,  $J = 17.1$  Hz, 1H), 3.389 (s br, 1H), 2.212 (ddq,  $J = 6.7, 6.8, 6.9$  Hz, 1H), 1.994 (s br, 1H), 1.200-1.800 (m, 14H), 1.039 (d,  $J = 6.9$  Hz, 3H), 0.971 (d,  $J = 6.9$  Hz, 3H) 0.896 (t,  $J = 6.0$  Hz, 3H);  $^{13}\text{C NMR}$  ( $\text{CDCl}_3$ , 75 MHz, ppm)  $\delta = 195.10, 153.35, 140.24, 140.14, 129.44, 126.40, 122.03, 116.53, 116.49, 88.77, 88.52, 77.45, 77.23, 77.03, 76.61, 74.80, 74.55, 44.23, 44.16, 35.77, 31.93, 31.70, 31.62, 29.70, 29.53, 29.35, 29.23, 28.50, 28.21, 25.43, 25.38, 22.60, 16.36, 16.31, 15.04, 14.82, 14.08$ ; FTIR  $\nu_{\text{max}}$  3439, 3072, 2956, 2928, 2858, 1592, 1490, 1458, 1368, 1283, 1197, 1002, 914, 768  $\text{cm}^{-1}$ ; HRMS calcd for  $\text{C}_{23}\text{H}_{36}\text{O}_3\text{SNa}$ : 415.2283, found 415.2267.

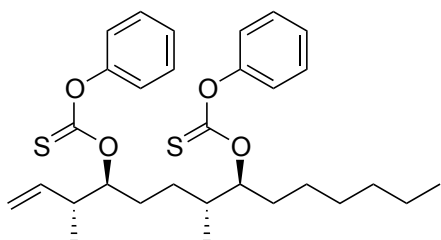

***O,O'*-((3*R*,4*S*,7*R*,8*S*)-3,7-Dimethyltetradec-1-ene-4,8-diyl) *O,O'*-diphenyl dicarbonothioate:**

This acylation reaction was performed according to General Procedure 3 using allylic alcohol RSRS-14 (2.2 g, 5.6 mmol) and *O*-phenyl chlorothionoformate (1.06 g, 6.2 mmol). The target thionocarbonate (RSRS) was isolated in 2.5 g, 84% yield as a colorless oil:  $[\alpha]_D^{25} = -1.68$  ( $c =$

1.79, CHCl<sub>3</sub>); <sup>1</sup>H NMR (CDCl<sub>3</sub>, 300 MHz, ppm) δ = 7.409 (t, *J* = 7.5 Hz, 4H), 7.269 (t, *J* = 7.5 Hz, 2H), 7.089 (d, *J* = 7.8 Hz, 4H), 5.761 (ddd, *J* = 8.4, 11.3, 16.7 Hz, 1H), 5.282-5.386 (m, 2H), 5.141 (d, *J* = 6.9 Hz, 1H), 5.123 (d, *J* = 17.1 Hz, 1H), 2.651 (ddq, *J* = 6.7, 6.8, 6.9 Hz, 2H), 1.995 (s br, 1H), 1.200-1.800 (m, 14H), 1.099 (d, *J* = 6.9 Hz, 3H), 0.981 (d, *J* = 6.9 Hz, 3H) 0.894 (t, *J* = 6.0 Hz, 3H); <sup>13</sup>C NMR (CDCl<sub>3</sub>, 75 MHz, ppm) δ = 195.13, 195.10, 153.33, 138.72, 138.60, 129.45, 126.45, 126.42, 122.04, 122.01, 116.29, 89.35, 89.21, 88.42, 88.07, 77.46, 77.24, 77.04, 76.61, 41.09, 35.81, 35.76, 31.70, 29.90, 29.77, 29.25, 28.26, 28.11, 27.92, 27.51, 25.26, 22.60, 15.78, 15.60, 15.07, 14.99, 14.09; FTIR  $\nu_{\max}$  3072, 2058, 2929, 2858, 1592, 1489, 1457, 1358, 1280, 1196, 1121, 1002, 919, 829, 769 cm<sup>-1</sup>; HRMS calcd for C<sub>30</sub>H<sub>40</sub>O<sub>4</sub>S<sub>2</sub>Na: 551.2266, found 551.2318.

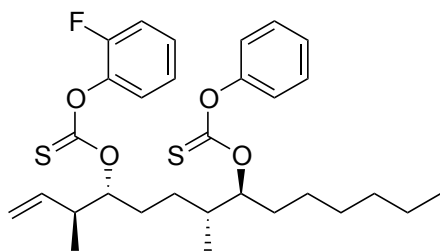

***O,O'*-((3*S*,4*R*,7*R*,8*S*)-3,7-Dimethyltetradec-1-ene-4,8-diyl) *O'*-(2-fluorophenyl) *O*-phenyl**

**dicarbonothioate:** This acylation reaction was performed according to General Procedure 3 using allylic alcohol SRRS-14 (1.1 g, 2.8 mmol) and the crude mixture of *O*-2-fluorophenyl chlorothionoformate **7b** (0.85 g, 4.5 mmol). The target thionocarbonate (2-fluorophenyl-SRRS) was isolated in 1.3 g, 84% yield as a colorless oil:  $[\alpha]_{\text{D}}^{25} = -1.22$  (*c* = 1.05, CHCl<sub>3</sub>); <sup>1</sup>H NMR (CDCl<sub>3</sub>, 400 MHz, ppm) δ = 7.090–7.425 (m, 9H), 5.777 (ddd, *J* = 8.1, 10.4, 17.1 Hz, 1H), 5.308-5.390 (m, 2H), 5.128 (d, *J* = 18.1 Hz, 1H), 5.118 (d, *J* = 9.1 Hz, 1H), 2.665 (ddq, *J* = 6.7, 6.8, 6.9 Hz, 2H), 1.931-2.002 (m, 1H), 1.800-1.931 (m, 1H), 1.211-1.800 (m, 12H), 1.110 (d, *J* = 6.9 Hz, 3H), 0.983 (d, *J* = 6.8 Hz, 3H) 0.894 (t, *J* = 6.7 Hz, 3H); <sup>13</sup>C NMR (CDCl<sub>3</sub>, 100 MHz, ppm) δ = 195.13, 194.03, 192.43, 155.63, 155.38, 153.39, 152.32, 152.05, 140.99, 140.83, 140.74, 140.58, 138.51, 138.41, 129.47, 128.28, 128.18, 127.78, 127.69, 126.43, 124.75, 124.69, 124.55, 124.50, 124.00, 123.68, 122.07, 117.31, 117.07, 117.01, 116.77, 116.40, 89.41, 89.25,



88.96, 41.14, 35.79, 35.67, 31.72, 29.77, 29.68, 29.25, 28.35, 28.26, 27.81, 27.49, 25.35, 22.63, 15.76, 15.61, 15.06, 14.94, 14.11; FTIR  $\nu_{\max}$  3072, 2958, 2930, 2859, 1600, 1501, 1459, 1363, 1261, 1196, 1101, 1001, 922, 845, 829, 762  $\text{cm}^{-1}$ ; HRMS calcd for  $\text{C}_{30}\text{H}_{39}\text{O}_4\text{S}_2\text{FNa}$ : 569.2172, found 569.2180.

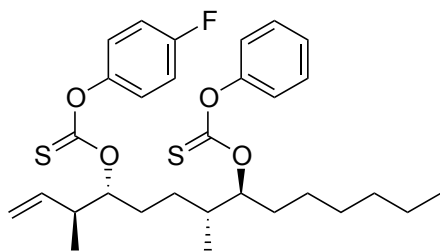

***O,O'*-((3*S*,4*R*,7*R*,8*S*)-3,7-Dimethyltetradec-1-ene-4,8-diyl) *O'*-(4-fluorophenyl) *O*-phenyl**

**dicarbonothioate:** This acylation reaction was performed according to General Procedure 3

using allylic alcohol SRRS-14 (2.2 g, 6.0 mmol) and *O*-4-fluorophenyl chlorothionoformate **7d** (1.3 g, 6.7 mmol). The target thionocarbonate (4-fluorophenyl-SRRS) was isolated in 2.6 g, 85%

yield as a colorless oil:  $[\alpha]_{\text{D}}^{25} = -1.35$  ( $c = 1.11$ ,  $\text{CHCl}_3$ );  $^1\text{H NMR}$  ( $\text{CDCl}_3$ , 400 MHz, ppm)  $\delta =$  7.389 (t,  $J = 7.5$  Hz, 2H), 7.269 (t,  $J = 7.5$  Hz, 1H), 7.099 (d,  $J = 7.8$  Hz, 2H), 7.049 (d,  $J = 6.3$  Hz, 4H), 5.785 (ddd,  $J = 8.1, 10.4, 17.1$  Hz, 1H), 5.308-5.390 (m, 2H), 5.128 (d,  $J = 18.1$  Hz, 1H), 5.118 (d,  $J = 9.1$  Hz, 1H), 2.665 (ddq,  $J = 6.7, 6.8, 6.9$  Hz, 2H), 1.965-2.033 (m, 1H), 1.833-1.936 (m, 1H), 1.220-1.806 (m, 12H), 1.107 (d,  $J = 6.9$  Hz, 3H), 0.983 (d,  $J = 6.8$  Hz, 3H) 0.896 (t,  $J = 6.7$  Hz, 3H);  $^{13}\text{C NMR}$  ( $\text{CDCl}_3$ , 100 MHz, ppm)  $\delta =$  195.23, 195.16, 161.83, 159.42, 159.39, 153.42, 149.39, 149.36, 149.24, 149.22, 138.70, 138.59, 129.50, 126.47, 126.47, 123.63, 123.59, 123.55, 123.41, 123.32, 122.09, 116.59, 116.36, 116.31, 116.18, 116.14, 116.07, 115.95, 89.34, 89.21, 88.70, 88.32, 41.16, 36.11, 35.86, 34.71, 34.56, 31.75, 31.63, 30.02, 29.89, 29.30, 29.10, 28.32, 28.13, 27.99, 27.56, 25.32, 25.29, 22.70, 22.65, 20.75, 18.81, 15.82, 15.64, 15.13, 15.03, 14.18, 14.14; FTIR  $\nu_{\max}$  3076, 2958, 2929, 2858, 1502, 1280, 1191, 1003, 922, 839, 738  $\text{cm}^{-1}$ ; HRMS calcd for  $\text{C}_{30}\text{H}_{39}\text{O}_4\text{S}_2\text{FNa}$ : 569.2172, found 569.2173. 86

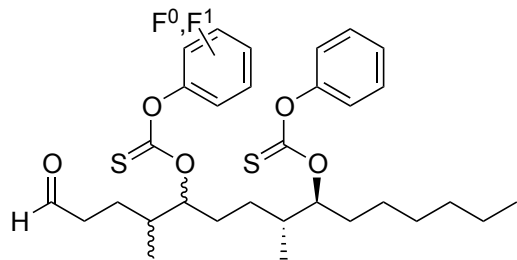

**Mixture of *O,O'*-((4*R*,5*S*,8*R*,9*S*)-4,8-dimethyl-1-oxopentadecane-5,9-diyl) *O,O'*-diphenyl dicarbonothioate and *O,O'*-((4*S*,5*R*,8*R*,9*S*)-4,8-dimethyl-1-oxopentadecane-5,9-diyl) *O'*-(2-fluorophenyl) *O*-phenyl dicarbonothioate (M-15-1):** This Rh-catalyzed hydroformylation reaction was performed according to General Procedure 4 using 1:1 mixture of thionocarbonates (RSRS) + (2-fluorophenyl-SRRS) (2.0 g, 3.8 mmol), pyridone ligand **11** (0.18 g, 12.2 mmol), and Rh catalyst (0.04 g, 2.5 mmol). Aldehyde M-**15** was isolated in 4.4 g, 82% yield as a colorless oil: HRMS calcd for C<sub>31</sub>H<sub>42</sub>O<sub>5</sub>S<sub>2</sub>Na: 581.2371, found 581.2336; calcd for C<sub>31</sub>H<sub>41</sub>O<sub>5</sub>S<sub>2</sub>FNa: 599.2277, found 599.2228.

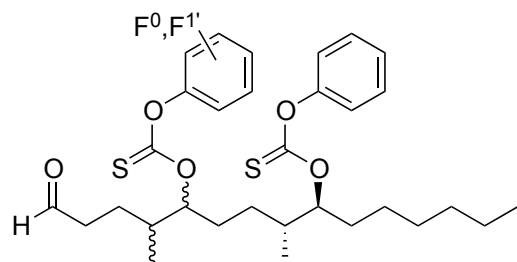

**Mixture of *O,O'*-((4*R*,5*S*,8*R*,9*S*)-4,8-dimethyl-1-oxopentadecane-5,9-diyl) *O,O'*-diphenyl dicarbonothioate and *O,O'*-((4*S*,5*R*,8*R*,9*S*)-4,8-dimethyl-1-oxopentadecane-5,9-diyl) *O'*-(4-fluorophenyl) *O*-phenyl dicarbonothioate (M-15-2):** This Rh-catalyzed hydroformylation reaction was performed according to General Procedure 4 using 1:1 mixture of thionocarbonates (RSRS) + (4-fluorophenyl-SRRS) (5.08 g, 9.4 mmol), pyridone ligand **11** (0.46 g, 1.7 mmol), and Rh catalyst (0.09 g, 0.33 mmol). Aldehyde M-**15-2** was isolated in 4.4 g, 82% yield as a colorless oil: HRMS calcd for C<sub>31</sub>H<sub>42</sub>O<sub>5</sub>S<sub>2</sub>Na: 581.2371, found 581.2393; calcd for C<sub>31</sub>H<sub>41</sub>O<sub>5</sub>S<sub>2</sub>FNa: 599.2277, found 599.2264.

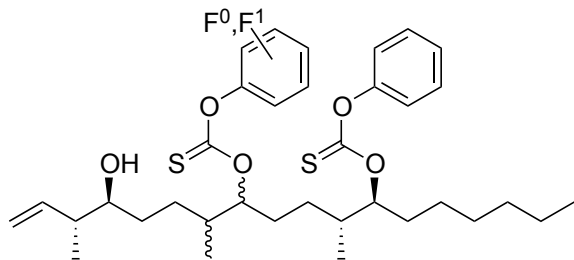

**Mixture of *O,O'*-((7*S*,8*R*,11*S*,12*R*,15*S*,16*R*)-15-hydroxy-8,12,16-trimethyloctadec-17-ene-7,11-diyl) *O,O'*-diphenyl dicarbonothioate and *O'*-(2-fluorophenyl) *O,O'*-((7*S*,8*R*,11*R*,12*S*,15*S*,16*R*)-15-hydroxy-8,12,16-trimethyloctadec-17-ene-7,11-diyl) *O*-phenyl dicarbonothioate:** This Roush crotylation reaction was performed according to General Procedure 2 using mixture aldehyde M-15-1 (0.6 g, 0.52 mmol) and Roush reagent SS-8 (1.0 ml, 1.0 mmol). The resulting allylic alcohol mixture was isolated in 0.52 g, 80% yield as a colorless oil: HRMS calcd for C<sub>31</sub>H<sub>50</sub>O<sub>5</sub>S<sub>2</sub>Na: 637.2997, found 637.3007; HRMS calcd for C<sub>23</sub>H<sub>36</sub>O<sub>3</sub>S<sub>1</sub>F<sub>1</sub>Na: 655.2903, found 655.2900.

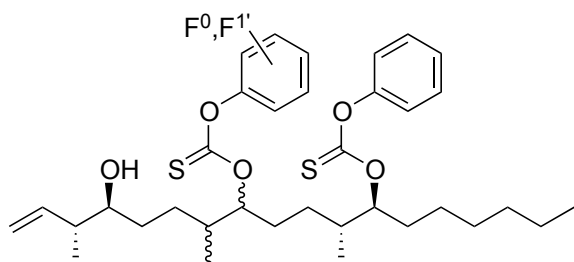

**Mixture of *O,O'*-((7*S*,8*R*,11*S*,12*R*,15*S*,16*R*)-15-hydroxy-8,12,16-trimethyloctadec-17-ene-7,11-diyl) *O,O'*-diphenyl dicarbonothioate and *O'*-(4-fluorophenyl) *O,O'*-((7*S*,8*R*,11*R*,12*S*,15*S*,16*R*)-15-hydroxy-8,12,16-trimethyloctadec-17-ene-7,11-diyl) *O*-phenyl dicarbonothioate:** This Roush crotylation reaction was performed according to General Procedure 2 using mixture aldehyde M-15-2 (2.16 g, 3.8 mmol) and Roush reagent SS-8 (8.0 ml, 8.0 mmol). The resulting allylic alcohol mixture was isolated in 2.0 g, 84% yield as a colorless oil: HRMS calcd for C<sub>31</sub>H<sub>50</sub>O<sub>5</sub>S<sub>2</sub>Na: 637.2997, found 637.3015; HRMS calcd for C<sub>23</sub>H<sub>36</sub>O<sub>3</sub>SFNa: 655.2903, found 655.2964.

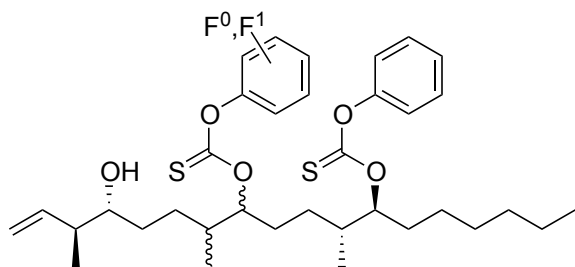

**Mixture of *O,O'*-((7*S*,8*R*,11*S*,12*R*,15*R*,16*S*)-15-hydroxy-8,12,16-trimethyloctadec-17-ene-7,11-diyl) *O,O'*-diphenyl dicarboxylate and *O'*-(2-fluorophenyl) *O,O'*-((7*S*,8*R*,11*R*,12*S*,15*R*,16*S*)-15-hydroxy-8,12,16-trimethyloctadec-17-ene-7,11-diyl) *O*-phenyl dicarboxylate:** This Roush crotylation reaction was performed according to General Procedure 2 using mixture aldehyde M-15-1 (0.6 g, 0.52 mmol) and Roush reagent RR-8 (1.0 ml, 1 mmol). The resulting allylic alcohol mixture was isolated in 0.52 g, 79% yield as a colorless oil: HRMS calcd for C<sub>31</sub>H<sub>50</sub>O<sub>5</sub>S<sub>2</sub>Na: 637.2997, found 637.3005; HRMS calcd for C<sub>23</sub>H<sub>36</sub>O<sub>3</sub>SFNa: 655.2903, found 655.2878.

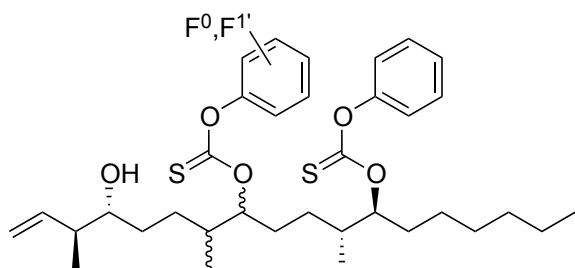

**Mixture of *O,O'*-((7*S*,8*R*,11*S*,12*R*,15*R*,16*S*)-15-hydroxy-8,12,16-trimethyloctadec-17-ene-7,11-diyl) *O,O'*-diphenyl dicarboxylate and *O'*-(4-fluorophenyl) *O,O'*-((7*S*,8*R*,11*R*,12*S*,15*R*,16*S*)-15-hydroxy-8,12,16-trimethyloctadec-17-ene-7,11-diyl) *O*-phenyl dicarboxylate:** This Roush crotylation reaction was performed according to General Procedure 2 using mixture aldehyde M-15-2 (2.36 g, 4.16 mmol) and Roush reagent RR-8 (15 ml, 8.3 mmol). The resulting allylic alcohol mixture was isolated in 2.18 g, 83% yield as a colorless oil: HRMS calcd for C<sub>31</sub>H<sub>50</sub>O<sub>5</sub>S<sub>2</sub>Na: 637.2997, found 637.3016; HRMS calcd for C<sub>23</sub>H<sub>36</sub>O<sub>3</sub>SFNa: 655.2903, found 655.2924.

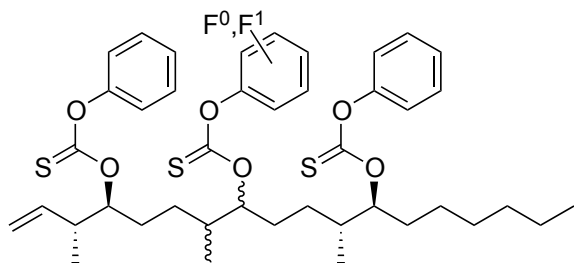

**Mixture of *O,O',O''*-triphenyl *O,O',O''*((3*R*,4*S*,7*R*,8*S*, 11*R*,12*S*)-3,7,11-trimethyloctadec-1-ene-4,8, 12-triyl) tri-carbonothioate and *O'*-(2-fluorophenyl) *O,O''*-diphenyl *O,O',O''*-((3*R*,4*S*,7*S*,8*R*,11*R*,12*S*)-3,7,11-tri-methyloctadec-1-ene-4,8,12-triyl) tricarbonothioate :** This acylation reaction was performed according to General Procedure 3 using mixture allylic alcohol with RSMMS stereocenters in pilot one study (0.3 g, 0.24 mmol) and *O*-phenyl chlorothionoformate (0.09 g, 0.54 mmol). The target mixture thionocarbonate was isolated in 0.32 g, 88% yield as a colorless oil: HRMS calcd for C<sub>42</sub>H<sub>54</sub>O<sub>6</sub>S<sub>3</sub>Na: 773.2980, found 773.2962; HRMS calcd for C<sub>42</sub>H<sub>53</sub>O<sub>6</sub>S<sub>3</sub>FNa: 791.2886, found 791.2934.

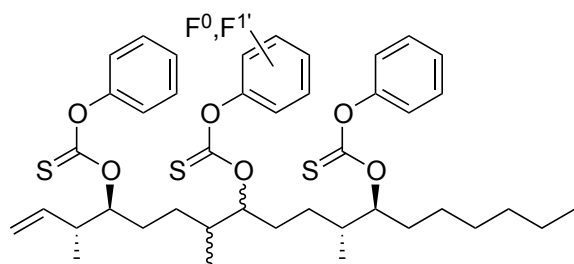

**Mixture of *O,O',O''*-triphenyl *O,O',O''*((3*R*,4*S*,7*R*,8*S*, 11*R*,12*S*)-3,7,11-trimethyloctadec-1-ene-4,8, 12-triyl) tricarbonothioate and *O'*-(4-fluorophenyl) *O,O''*-diphenyl *O,O',O''*-((3*R*,4*S*,7*S*,8*R*,11*R*,12*S*)-3,7,11-tri-methyloctadec-1-ene-4,8,12-triyl) tricarbonothioate:** This acylation reaction was performed according to General Procedure 3 using mixture allylic alcohol with RSMMS stereocenters in pilot two study (2.0 g, 3.1 mmol) and *O*-phenyl chlorothionoformate (0.61 g, 3.6 mmol). The target mixture thionocarbonate was isolated in 2.6 g, 86% yield as a colorless oil: HRMS calcd for C<sub>42</sub>H<sub>54</sub>O<sub>6</sub>S<sub>3</sub>Na: 773.2980, found 773.2962; HRMS calcd for C<sub>42</sub>H<sub>53</sub>O<sub>6</sub>S<sub>3</sub>FNa: 791.2886, found 791.2870.

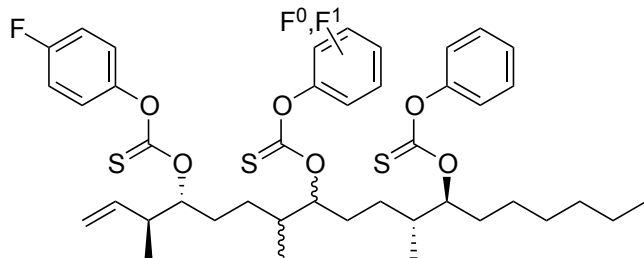

**Mixture of *O''*-(4-fluorophenyl) *O,O'*-diphenyl *O,O',O''*-((3*S*,4*R*,7*R*,8*S*,11*R*,12*S*)-3,7,11-trimethyloctadec-1-ene-4,8, 12-triyl) tricarbothioate and *O''*-(4-fluoro-phenyl) *O'*-(2-fluorophenyl) *O*-phenyl *O,O',O''*-((3*S*,4*R*,7*S*,8*R*,11*R*,12*S*)-3,7,11-trimethyloctadec-1-ene-4,8, 12-triyl) tricarbothioate:** This acylation reaction was performed according to General Procedure 3 using allylic alcohol with SRMMRS stereocenters in pilot one study (0.3 g, 0.24 mmol) and *O*-4-fluorophenyl chlorothiono-formate (0.1 g, 0.54 mmol). The target mixture thionocarbonate was isolated in 0.32 g, 88% yield as colorless oil: HRMS calcd for  $C_{42}H_{52}O_6S_3F_2Na$ : 809.2792, found 809.2755; HRMS calcd for  $C_{42}H_{53}O_6S_3FNa$ : 791.2886, found 791.2934.

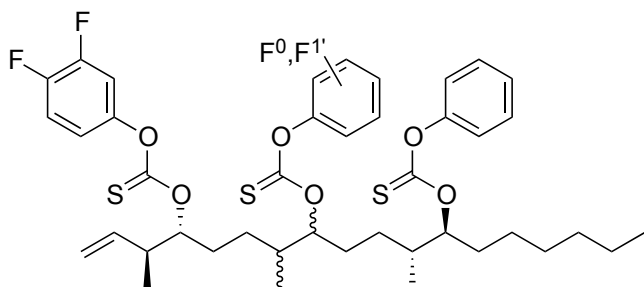

**Mixture of *O''*-(3,4-difluorophenyl) *O,O'*-diphenyl *O,O',O''*-((3*S*,4*R*,7*R*,8*S*,11*R*,12*S*)-3,7,11-trimethyloctadec-1-ene-4,8, 12-triyl) tricarbothioate and *O''*-(3,4-difluoro-phenyl) *O'*-(4-fluorophenyl) *O*-phenyl *O,O',O''*-((3*S*,4*R*,7*S*,8*R*,11*R*,12*S*)-3,7,11-trimethyloctadec-1-ene-4,8,12-triyl) tricarbothioate:** This acylation reaction was performed according to General Procedure 3 using allylic alcohol with stereocenters SRMMRS in pilot 2 study (2.0 g, 3.16 mmol) and the crude product of *O*-3,4- difluorophenyl chlorothiono-formate **57** (~0.70 g, 3.30 mmol). The target mixture thionocarbonate was isolated in 2.2 g, 88% yield as a colorless oil: HRMS calcd for  $C_{42}H_{52}O_6S_3F_2Na$ : 809.2792, found 809.2757; HRMS calcd for

$C_{42}H_{51}O_6S_3F_3Na$ : 827.2698, found 827.2710.

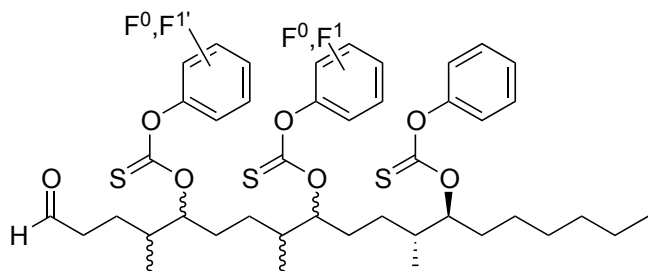

Mixture of *O,O',O''*-triphenyl *O,O',O''*-((4*R*, 5*S*, 8*R*, 9*S*, 12*R*,13*S*)-4,8,12-trimethyl-1-oxononadecane-5,9, 13-triyl) tricarboxylate, *O'*-(2-fluorophenyl) *O, O''*-diphenyl *O,O', O''*-((4*R*,5*S*,8*S*,9*R*,12*R*,13*S*)-4,8,12-trimethyl-1-oxononadecane-5,9,13-triyl) tricarboxylate, *O''*-(4-fluorophenyl) *O,O'*-diphenyl *O,O',O''*-((4*S*,5*R*,8*R*,9*S*,12*R*,13*S*)-4,8,12-trimethyl-1-oxononadecane-5,9,13-triyl) tricarboxylate, and *O''*-(4-fluorophenyl) *O'*-(2-fluorophenyl) *O-phenyl O,O',O''*-((4*S*,5*R*,8*S*,9*R*,12*R*,13*S*)-4,8,12-trimethyl-1-oxononadecane-5,9,13-triyl) tricarboxylate: This Rh-catalyzed hydroformylation reaction was performed according to General Procedure 4 using 1:1 mixture of thionocarbonates (RSMMS) and (SRMMS) (0.3 g, 0.39 mmol), pyridone ligand **11** (0.07 g, 0.14 mmol), and Rh catalyst (0.007 g, 0.027 mmol). The resulting aldehyde was isolated in 0.26 g, 83% yield as a colorless oil: HRMS calcd for  $C_{43}H_{56}O_7S_3Na$ : 803.3086, found 803.3066; HRMS calcd for  $C_{43}H_{55}O_7S_3FNa$ : 821.2992, found 821.3021; HRMS calcd for  $C_{43}H_{54}O_7S_3F_2Na$ : 839.2897, found 839.2896.

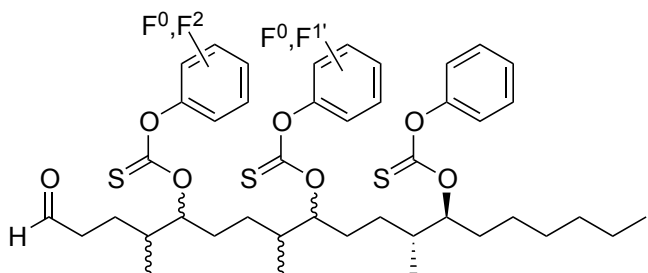

Mixture of *O,O',O''*-triphenyl *O,O',O''*-((4*R*, 5*S*, 8*R*, 9*S*, 12*R*,13*S*)-4,8,12-trimethyl-1-oxononadecane-5,9, 13-triyl) tricarboxylate, *O'*-(4-fluorophenyl) *O, O''*-diphenyl *O,O', O''*-((4*R*,5*S*,8*S*,9*R*,12*R*,13*S*)-4,8,12-trimethyl-1-oxononadecane-5,9,13-triyl) tricarboxylate,

ate, *O''*-(3,4-difluorophenyl) *O,O'*-diphenyl *O,O'*, *O''*-((4*S*,5*R*,8*R*,9*S*,12*R*,13*S*)-4,8,12-trimethyl-1-oxononadecane-5,9,13-triyl) tricarbonothioate, and *O''*-(3,4-difluorophenyl) *O'*-(4-fluorophenyl) *O*-phenyl *O,O',O''*-((4*S*,5*R*,8*S*,9*R*,12*R*,13*S*)-4,8,12-trimethyl-1-oxononadecane-5,9,13-triyl) tricarbonothioate: This Rh-catalyzed hydroformylation reaction was performed according to General Procedure 4 using 1:1 mixture of thionocarbonates (RSMMRS) and (SRMMRS) (3.6 g, 4.6 mmol), pyridone ligand **11** (0.81 g, 1.6 mmol), and Rh catalyst (0.09 g, 0.32 mmol). The resulting aldehyde was isolated in 3.0 g, 80% yield as a colorless oil: HRMS calcd for C<sub>43</sub>H<sub>56</sub>O<sub>7</sub>S<sub>3</sub>Na: 803.3086, found 803.3066; HRMS calcd for C<sub>43</sub>H<sub>55</sub>O<sub>7</sub>S<sub>3</sub>FNa: 821.2992, found 821.2988; HRMS calcd for C<sub>43</sub>H<sub>54</sub>O<sub>7</sub>S<sub>3</sub>F<sub>2</sub>Na: 839.2897, found 839.2916; HRMS calcd for C<sub>43</sub>H<sub>53</sub>O<sub>7</sub>S<sub>3</sub>F<sub>3</sub>Na: 857.2803, found 857.2819.

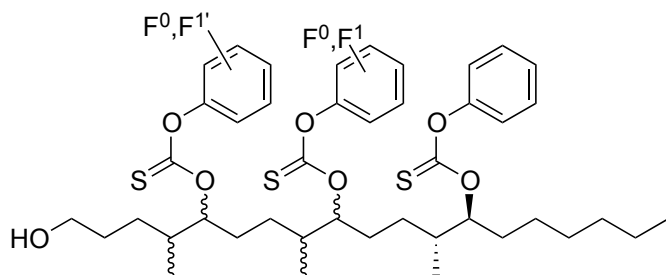

Mixture of *O,O',O''*-((4*R*,5*S*,8*R*,9*S*,12*R*,13*S*)-1-hydroxy-4,8,12-trimethylnonadecane-5,9,13-triyl) *O,O',O''*-triphenyl tricarbonothioate, *O'*-(2-fluorophenyl) *O,O',O''*-((4*R*,5*S*,8*S*,9*R*,12*R*,13*S*)-1-hydroxy-4,8,12-tri-methylnonadecane-5,9,13-triyl) *O,O''*-diphenyl tri-carbono-thioate, *O''*-(4-fluorophenyl) *O,O',O''*-((4*S*,5*R*,8*R*,9*S*,12*R*,13*S*)-1-hydroxy-4,8,12-trimethyl-nonadecane-5,9,13-triyl) *O,O'*-diphenyl tricarbonothioate, and *O''*-(4-fluorophenyl) *O'*-(2-fluorophenyl) *O,O',O''*-((4*S*,5*R*,8*S*,9*R*,12*R*,13*S*)-1-hydroxy-4,8,12-trimethylnonadecane-5,9, 13-triyl) *O*-phenyl tricarbonothioate **M-16**: To a solution of mixture aldehyde (pilot one) in THF (4 mL) at 0 °C was added DIBAL-*H* (0.30 mL, 0.29 mmol). The reaction was stirred for 3 h at 0 °C. The reaction was quenched by addition of saturated aq NH<sub>4</sub>Cl (1 mL) followed by extraction of the aqueous layer with Et<sub>2</sub>O (5 mL, 3 times). The combined organic layers was dried over MgSO<sub>4</sub> and concentrated. The crude product was



purified by column chromatography (9:1 hexanes-diethylether). Mixture alcohol **M-16 in pilot study one** was isolated in 0.14 g, 71.5% yield as a colorless viscous oil: HRMS calcd for  $C_{43}H_{58}O_7S_3Na$ : 805.3242, found 805.3220; HRMS calcd for  $C_{43}H_{57}O_7S_3F_1Na$ : 823.3148, found 823.3088; HRMS calcd for  $C_{43}H_{56}O_7S_3F_2Na$ : 841.3054, found 841.3113.

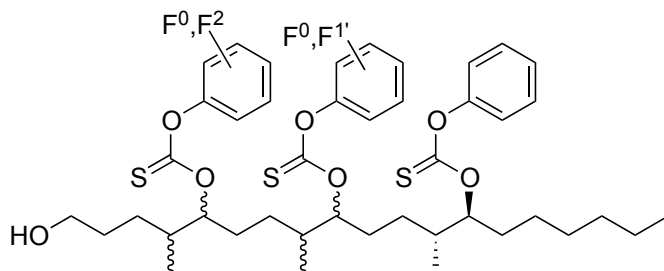

**Mixture of  $O,O',O''$ -((4*R*,5*S*,8*R*,9*S*,12*R*,13*S*)-1-hydroxy-4,8,12-trimethylnonadecane-5,9,13-triyl)  $O,O',O''$ -triphenyl tricarbonothioate,  $O'$ -(4-fluorophenyl)  $O,O',O''$ -((4*R*,5*S*,8*S*,9*R*,12*R*,13*S*)-1-hydroxy-4,8,12-trimethylnonadecane-5,9,13-triyl)  $O,O''$ -diphenyl tri-carbonothioate,  $O''$ -(3,4-difluorophenyl)  $O,O',O''$ -((4*S*,5*R*,8*R*,9*S*,12*R*,13*S*)-1-hydroxy-4,8,12-trimethylnonadecane-5,9,13-triyl)  $O,O'$ -diphenyl tricarbonothioate, and  $O''$ -(3,4-difluorophenyl)  $O'$ -(4-fluorophenyl)  $O,O',O''$ -((4*S*,5*R*,8*S*,9*R*,12*R*,13*S*)-1-hydroxy-4,8,12-trimethylnonadecane-5,9,13-triyl)  $O$ -phenyl tricarbonothioate **M-16**:** To a solution of **mixture aldehyde (pilot two)** in THF (10 mL) at 0 °C was added DIBAL-*H* (1.95 mL, 1.95 mmol.). The reaction was stirred for 3 h at 0 °C. The reaction was quenched with addition of saturated aq  $NH_4Cl$  (3 mL) followed by extraction of the aqueous layer with Et<sub>2</sub>O (5 mL, 3 times). The combined organic layers was dried over  $MgSO_4$  and concentrated. The crude product was purified by column chromatography (9:1 hexanes-diethylether). Mixture alcohol **M-16** was isolated in 0.88 g, 88% yield as a colorless viscous oil: HRMS calcd for  $C_{43}H_{58}O_7S_3Na$ : 805.3242, found 805.3287; HRMS calcd for  $C_{43}H_{57}O_7S_3FNa$ : 823.3148, found 823.3119; HRMS calcd for  $C_{43}H_{56}O_7S_3F_2Na$ : 841.3054, found 841.3100; HRMS calcd for  $C_{43}H_{55}O_7S_3F_3Na$ : 859.2960, found 859.3012.

### Purified Products after Fluorous HPLC demixing

**Preparative Demixing:** The semi-prep scale F-HPLC demixing of alcohol M-16 (**pilot study two**) was achieved on the PF-C8 column (FluoroFlash® 100 Å, 5 μm) by eluting with a gradient of 60:40 CH<sub>3</sub>CN/H<sub>2</sub>O to 100% CH<sub>3</sub>CN over 1 h (Figure 3.3). Because of the close elution of the four peaks (40 min, 42 min, 44 min, 46 min), the demixing was accomplished by several 1 mL injections of 10 mg/mL of M-78 in CH<sub>3</sub>CN. The four different peaks were collected and the products were identified by <sup>19</sup>F NMR NMR spectroscopy prior to combination of fractions. Overall, 107 mg of M-78 was subjected to semi-prep HPLC, and the total of the four individual samples was 75 mg (~70%).

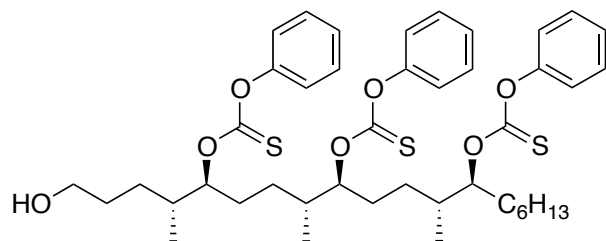

***O,O',O''*-((4*R*,5*S*,8*R*,9*S*,12*R*,13*S*)-1-Hydroxy-4,8,12-trimethylnonadecane-5,9,13-triyl)**

***O,O',O''*-triphenyl tricarbothioate [(4*R*,5*S*,8*R*,9*S*,12*R*,13*S*)-16a]:** (4*R*,5*S*,8*R*,9*S*,12*R*,13*S*)-

**16a** was obtained in 32 mg, 74% recovery:  $[\alpha]_D^{25} = +9.32$  ( $c = 0.21$ , CHCl<sub>3</sub>); <sup>1</sup>H NMR (CDCl<sub>3</sub>, 400 MHz, ppm)  $\delta = 7.380$  (t,  $J = 7.8$  Hz, 4H), 7.361 (t,  $J = 7.8$  Hz, 2H), 7.266 (t,  $J = 7.8$  Hz, 3H), 7.098 (d,  $J = 7.7$  Hz, 6H), 5.323-5.344 (m, 3H), 3.638 (t,  $J = 6.1$ , 2H), 1.969-2.036 (m, 3H), 1.251-1.952 (m, 22H), 1.007 (d,  $J = 6.8$  Hz, 3H), 1.001 (d,  $J = 6.3$  Hz, 3H), 0.985 (d,  $J = 6.7$  Hz, 3H), 0.891 (t,  $J = 6.7$  Hz, 3H); <sup>13</sup>C NMR (CDCl<sub>3</sub>, 100 MHz, ppm)  $\delta = 195.11, 195.08, 153.36, 153.33, 153.30, 129.46, 126.44, 122.04, 122.02, 89.46, 89.14, 89.11, 89.06, 62.96, 35.99, 35.91, 35.88, 35.62, 31.70, 30.23, 30.20, 30.04, 29.77, 29.26, 29.25, 28.47, 28.33, 28.27, 28.06, 28.00, 27.86, 27.66, 27.58, 27.53, 27.41, 27.03, 25.28, 22.60, 15.15, 15.10, 15.04, 14.97, 14.93, 14.87, 14.09$ ; FTIR  $\nu_{\max}$  3354, 3044, 2959, 2927, 2857, 1592, 1489, 1457, 1359, 1281, 1197, 1003, 769 cm<sup>-1</sup>; HRMS calcd for C<sub>43</sub>H<sub>58</sub>O<sub>7</sub>S<sub>3</sub>Na: 805.3242, found 805.3222.

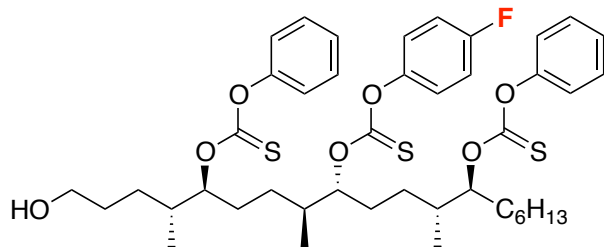

***O'*-(4-Fluorophenyl) *O,O',O''*-((4*R*,5*S*,8*S*,9*R*,12*R*,13*S*)-1-hydroxy-4,8,12-trimethylnonadecane-5,9,13-triyl) *O,O''*-diphenyl tricarbothioate [(4*R*,5*S*,8*S*,9*R*,12*R*,13*S*)-16b]:** (4*R*,5*S*,8*S*,9*R*,12*R*,13*S*)-**16b** was obtained in 28 mg, 72% recovery:  $[\alpha]_D^{25} = +2.33$  ( $c = 0.32$ ,  $\text{CHCl}_3$ );  $^1\text{H}$  NMR ( $\text{CDCl}_3$ , 400 MHz, ppm)  $\delta = 7.390$  (t,  $J = 7.8$  Hz, 4H), 7.383 (t,  $J = 7.8$  Hz, 2H), 7.274 (t,  $J = 7.8$  Hz, 3H), 7.098 (d,  $J = 8.2$  Hz, 2H), 7.091 (d,  $J = 8.3$  Hz, 2H), 7.001-7.068 (m, 4H), 5.313-5.356 (m, 3H), 3.654 (t,  $J = 6.0$ , 2H), 1.968-2.075 (m, 3H), 1.252-1.939 (m, 22H), 1.002 (d,  $J = 6.5$  Hz, 3H), 0.994 (d,  $J = 6.7$  Hz, 6H), 0.891 (t,  $J = 6.6$  Hz, 3H.);  $^{13}\text{C}$  NMR ( $\text{CDCl}_3$ , 100 MHz, ppm)  $\delta = 195.27, 195.23, 195.14, 161.79, 159.35, 153.36, 153.32, 153.29, 149.20, 149.17, 129.48, 126.47, 126.45, 123.66, 123.57, 122.05, 122.03, 116.28, 116.04, 89.41, 89.12, 89.04, 62.93, 36.00, 35.87, 35.65, 31.70, 30.23, 30.20, 30.09, 29.84, 29.27, 28.49, 28.36, 28.30, 28.09, 28.02, 27.86, 27.71, 27.55, 27.41, 27.03, 25.25, 22.60, 15.16, 15.11, 15.08, 15.02, 14.93, 14.90, 14.88, 14.09$ ; FTIR  $\nu_{\text{max}}$  3352, 2959, 2928, 2859, 1592, 1502, 1457, 1359, 1281, 1198, 1004, 738  $\text{cm}^{-1}$ ; HRMS calcd for  $\text{C}_{43}\text{H}_{57}\text{O}_7\text{S}_3\text{FNa}$ : 823.3148, found 823.3115.

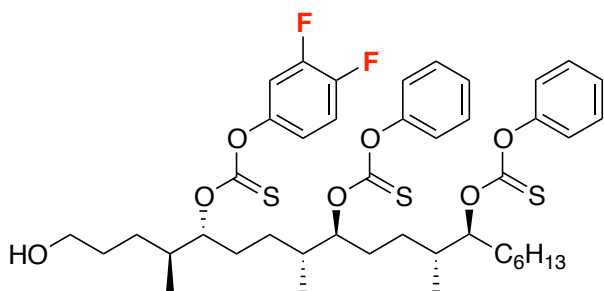

***O''*-(3,4-Difluorophenyl) *O,O',O''*-((4*S*,5*R*,8*R*,9*S*,12*R*,13*S*)-1-hydroxy-4,8,12-trimethylnonadecane-5,9,13-triyl) *O,O'*-diphenyl tricarbothioate [(4*S*,5*R*,8*R*,9*S*,12*R*,13*S*)-16c]:** (4*S*,5*R*,8*R*,9*S*,12*R*,13*S*)-**16c** was obtained in 30 mg, 71% recovery:  $[\alpha]_D^{25} = -1.34$  ( $c = 0.25$ ,  $\text{CHCl}_3$ );  $^1\text{H}$  NMR ( $\text{CDCl}_3$ , 400 MHz, ppm)  $\delta = 7.347$ –7.411 (m, 4H), 7.287–7.289 (m, 2H), 7.086–7.176 (m,

5H), 6.952–7.001 (m, 1H), 6.823–6.865 (m, 1H), 5.323–5.344 (m, 3H), 3.638 (t,  $J=6.1$ , 2H), 1.969–2.036 (m, 3H), 1.251–1.952 (m, 22H), 1.007 (d,  $J = 6.8$  Hz, 3H), 1.001 (d,  $J = 6.3$  Hz, 3H), 0.985 (d,  $J = 6.7$  Hz, 3H), 0.891 (t,  $J = 6.7$  Hz, 3H);  $^{13}\text{C}$  NMR ( $\text{CDCl}_3$ , 100 MHz, ppm)  $\delta =$  195.22, 195.16, 194.64, 153.39, 153.35, 151.44, 149.91, 148.94, 148.80, 148.74, 148.70, 148.65, 148.62, 148.57, 148.45, 129.50, 129.49, 126.52, 122.06, 118.45, 118.39, 118.35, 117.44, 117.25, 112.51, 112.31, 90.10, 89.64, 89.42, 89.33, 89.11, 62.91, 53.46, 35.98, 35.88, 35.84, 35.61, 31.72, 30.20, 30.02, 29.77, 29.28, 28.51, 28.39, 28.29, 28.12, 28.03, 27.89, 27.67, 27.47, 26.97, 25.30, 22.62, 15.18, 15.11, 15.03, 14.97, 14.94, 14.87, 14.10; FTIR  $\nu_{\text{max}}$  3385, 2959, 2928, 2858, 1513, 1490, 1458, 1284, 1195, 1004, 771  $\text{cm}^{-1}$ ; HRMS calcd for  $\text{C}_{43}\text{H}_{56}\text{O}_7\text{S}_3\text{F}_2\text{Na}$ : 841.3054, found 841.3025.

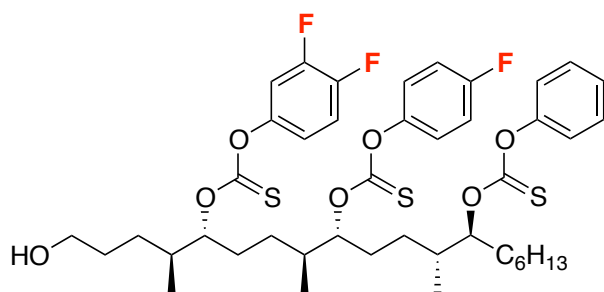

***O''*-(3,4-Difluorophenyl) *O'*-(4-fluorophenyl) *O,O',O''*-((4*S*,5*R*,8*S*,9*R*,12*R*,13*S*)-1-hydroxy-4,8,12-trimethyl-nonadecane-5,9,13-triyl) *O*-phenyl tricarbothioate [(4*S*,5*R*,8*S*,9*R*,12*R*,13*S*)-16d]:** (4*S*,5*R*,8*S*,9*R*,12*R*,13*S*)-16d was obtained in 29 mg, 71% recovery:  $[\alpha]_{\text{D}}^{25} = -5.811$  ( $c = 0.22$ ,  $\text{CHCl}_3$ );  $^1\text{H}$  NMR ( $\text{CDCl}_3$ , 400 MHz, ppm)  $\delta = 7.347$ – $7.412$  (m, 2H), 7.287– $7.297$  (m, 1H), 7.086– $7.185$  (m, 7H), 6.945– $7.001$  (m, 1H), 6.818– $6.861$  (m, 1H), 5.289– $5.352$  (m, 3H), 3.654 (t,  $J=6.1$ , 2H), 1.955– $2.080$  (m, 3H), 1.195– $1.942$  (m, 22H), 1.007 (d,  $J = 6.7$  Hz, 3H), 0.994 (d,  $J = 6.5$  Hz, 3H), 0.986 (d,  $J = 6.7$  Hz, 3H), 0.891 (t,  $J = 6.7$  Hz, 3H);  $^{13}\text{C}$  NMR ( $\text{CDCl}_3$ , 100 MHz, ppm)  $\delta = 195.24$ , 195.15, 194.65, 161.82, 159.38, 153.36, 153.32, 151.43, 151.29, 150.03, 149.91, 149.14, 149.12, 148.80, 148.68, 148.65, 148.60, 148.57, 147.57, 147.45, 129.47, 126.46, 123.61, 123.52, 122.05, 118.38, 118.34, 118.29, 117.43, 117.24, 116.30, 116.06, 112.49, 112.30, 90.06, 89.60, 89.36, 89.11, 89.07, 88.86, 62.90, 35.95, 35.89, 35.66, 31.71, 30.20, 30.10,

29.85, 29.28, 28.50, 28.37, 28.28, 28.11, 28.02, 27.86, 27.62, 27.58, 27.43, 27.01, 26.95, 25.24, 22.61, 15.11, 14.96, 14.89, 14.86, 14.09; FTIR  $\nu_{\max}$  3377, 2959, 2929, 2859, 1504, 1290, 1198, 1005, 839, 796, 772, 738  $\text{cm}^{-1}$ ; HRMS calcd for  $\text{C}_{43}\text{H}_{55}\text{O}_7\text{S}_3\text{F}_3\text{Na}$ : 859.2960, found 859.2902.

### Final 4,8,12-Trimethylnonadecan-1-ol Samples

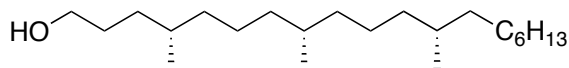

**(4S,8S,12S)-4,8,12-Trimethylnonadecan-1-ol [(4S,8S,12S)-1]:** This deoxygenation reaction was performed according to General Procedure 5 using triphenylthionocarbonate (4*R*,5*S*,8*R*,9*S*,12*R*,13*S*)-**16a** (0.020 g, 0.024 mmol), diMe-Imd-BH<sub>3</sub> (0.037 g, 0.12 mmol), and AIBN (0.020 g, 0.12 mmol). Alcohol (4*S*,8*S*,12*S*)-**1** was obtained in 0.006 g, 69% yield:  $[\alpha]_D^{25} = -7.2$  ( $c = 0.28$ ,  $\text{CHCl}_3$ ); <sup>1</sup>H NMR ( $\text{CDCl}_3$ , 700 MHz, ppm)  $\delta = 3.635$  (t,  $J = 6.6$  Hz, 2H), 1.664–1.504 (m, 2H), 1.443–1.003 (m, 30H), 0.882 (t,  $J = 7.0$  Hz, 3H), 0.873 (d,  $J = 6.6$  Hz, 3H), 0.840 (d,  $J = 6.6$  Hz, 6H); <sup>13</sup>C NMR ( $\text{CDCl}_3$ , 100 MHz, ppm)  $\delta = 63.51, 37.43, 37.37, 37.33, 37.16, 37.06, 33.00, 32.90, 32.80, 32.77, 32.65, 31.94, 30.36, 30.00, 29.42, 27.10, 25.33, 25.18, 24.47, 24.44, 22.71, 19.79, 19.77, 19.67, 14.15$ ; FTIR  $\nu_{\max}$  3333, 2959, 2924, 2854  $\text{cm}^{-1}$ ; HRMS calcd for  $\text{C}_{22}\text{H}_{45}\text{O}$ : 325.3470, found 325.3443.

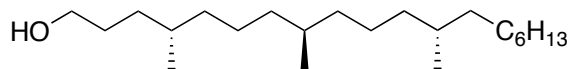

**(4S,8R,12S)-4,8,12-Trimethylnonadecan-1-ol [(4S,8R,12S)-1]:** This deoxygenation reaction was performed according to General Procedure 5 using triphenylthionocarbonate (4*R*,5*S*,8*S*,9*R*,12*R*,13*S*)-**16b** (0.020 g, 0.025 mmol), diMe-Imd-BH<sub>3</sub> (0.014 g, 0.125 mmol), and AIBN (0.020 g, 0.125 mmol). Alcohol (4*S*,8*R*,12*S*)-**1** was obtained in 0.0052 g, 64% yield:  $[\alpha]_D^{25} = 1.5$  ( $c = 0.38$ ,  $\text{CHCl}_3$ ); <sup>1</sup>H NMR ( $\text{CDCl}_3$ , 700 MHz, ppm)  $\delta = 3.635$  (t,  $J = 6.6$  Hz, 2H), 1.664–1.504 (m, 2H), 1.443–1.003 (m, 30H), 0.883 (t,  $J = 7.0$  Hz, 3H), 0.874 (d,  $J = 6.6$  Hz, 3H), 0.843 (d,  $J = 6.6$  Hz, 3H), 0.841 (d,  $J = 6.6$  Hz, 3H); <sup>13</sup>C NMR ( $\text{CDCl}_3$ , 100 MHz, ppm)  $\delta =$

63.50, 37.42, 37.37, 37.28, 37.15, 32.99, 32.91, 32.76, 32.63, 32.44, 31.94, 30.36, 30.00, 29.71, 29.41, 27.11, 25.32, 25.17, 24.47, 24.43, 22.71, 19.70, 19.66, 19.60, 14.14; FTIR  $\nu_{\max}$  3349, 2959, 2925, 2855  $\text{cm}^{-1}$ ; HRMS calcd for  $\text{C}_{22}\text{H}_{45}\text{O}$ : 325.3470, found 325.3442.

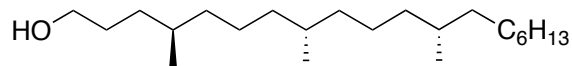

**(4R,8S,12S)-4,8,12-Trimethylnonadecan-1-ol [(4R,8S,12S)-1]:** This deoxygenation reaction was performed according to General Procedure 5 using triphenylthionocarbonate (4S,5R,8R,9S,12R,13S)-**16c** (0.018 g, 0.022 mmol), diMe-Imd-BH<sub>3</sub> (0.012 g, 0.110 mmol), and AIBN (0.018 g, 0.110 mmol). Alcohol (4R,8S,12S)-**1** was obtained in 0.0047 g, 65.5% yield:  $[\alpha]_D^{25} = 2.0$  ( $c = 0.29$ ,  $\text{CHCl}_3$ ); <sup>1</sup>H NMR ( $\text{CDCl}_3$ , 700 MHz, ppm)  $\delta = 3.635$  (t,  $J = 6.6$  Hz, 2H), 1.664–1.504 (m, 2H), 1.443–1.003 (m, 30H), 0.883 (t,  $J = 7.0$  Hz, 3H), 0.873 (d,  $J = 6.6$  Hz, 3H), 0.842 (d,  $J = 6.6$  Hz, 3H), 0.841 (d,  $J = 6.6$  Hz, 3H); <sup>13</sup>C NMR ( $\text{CDCl}_3$ , 100 MHz, ppm)  $\delta = 63.51, 37.49, 37.43, 37.38, 37.33, 37.16, 37.06, 32.99, 32.90, 32.78, 32.63, 31.94, 30.37, 30.36, 30.00, 29.71, 29.42, 27.10, 25.18, 24.48, 24.43, 22.71, 19.77, 19.73, 19.61, 14.15$ ; FTIR  $\nu_{\max}$  3333, 2958, 2925, 2854  $\text{cm}^{-1}$ ; HRMS calcd for  $\text{C}_{22}\text{H}_{45}\text{O}$ : 325.3470, found 325.3444.

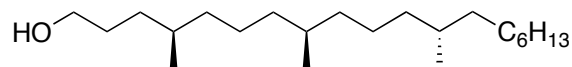

**(4R,8R,12S)-4,8,12-Trimethylnonadecan-1-ol [(4R,8R,12S)-1]:** This deoxygenation reaction was performed according to General Procedure 5 using triphenylthionocarbonate (4S,5R,8S,9R,12R,13S)-**16d** (0.017 g, 0.020 mmol), dime-Imd-BH<sub>3</sub> (0.011 g, 0.100 mmol), and AIBN (0.017 g, 0.100 mmol). Alcohol (4R,8R,12S)-**1** was obtained in 0.0042 g, 63.3% yield:  $[\alpha]_D^{25} = -2.4$  ( $c = 0.2$ ,  $\text{CHCl}_3$ ); <sup>1</sup>H NMR ( $\text{CDCl}_3$ , 700 MHz, ppm)  $\delta = 3.635$  (t,  $J = 6.6$  Hz, 2H), 1.664–1.504 (m, 2H), 1.443–1.003 (m, 30H), 0.882 (t,  $J = 7.0$  Hz, 3H), 0.874 (d,  $J = 6.6$  Hz, 3H), 0.841 (d,  $J = 6.6$  Hz, 3H), 0.840 (d,  $J = 6.6$  Hz, 3H); <sup>13</sup>C NMR ( $\text{CDCl}_3$ , 100 MHz, ppm)  $\delta = 63.50, 37.47, 37.43, 37.38, 37.33, 37.16, 33.00, 32.91, 32.78, 32.76, 32.66, 31.93, 30.37, 30.00, 29.41, 27.11, 25.18, 24.46, 24.45, 23.46, 22.70, 19.73, 19.70, 19.67, 14.13$ ; FTIR  $\nu_{\max}$  3334,

2958, 2925, 2855  $\text{cm}^{-1}$ ; HRMS calcd for  $\text{C}_{22}\text{H}_{45}\text{O}$ : 325.3470, found 325.3449.

**Figure S1.** Predicted appearance of the branched-methyl region of the  $^{13}\text{C}$  NMR spectra of all 2,6,10,14-tetramethylhenicosan-1-ol **17** stereoisomers.

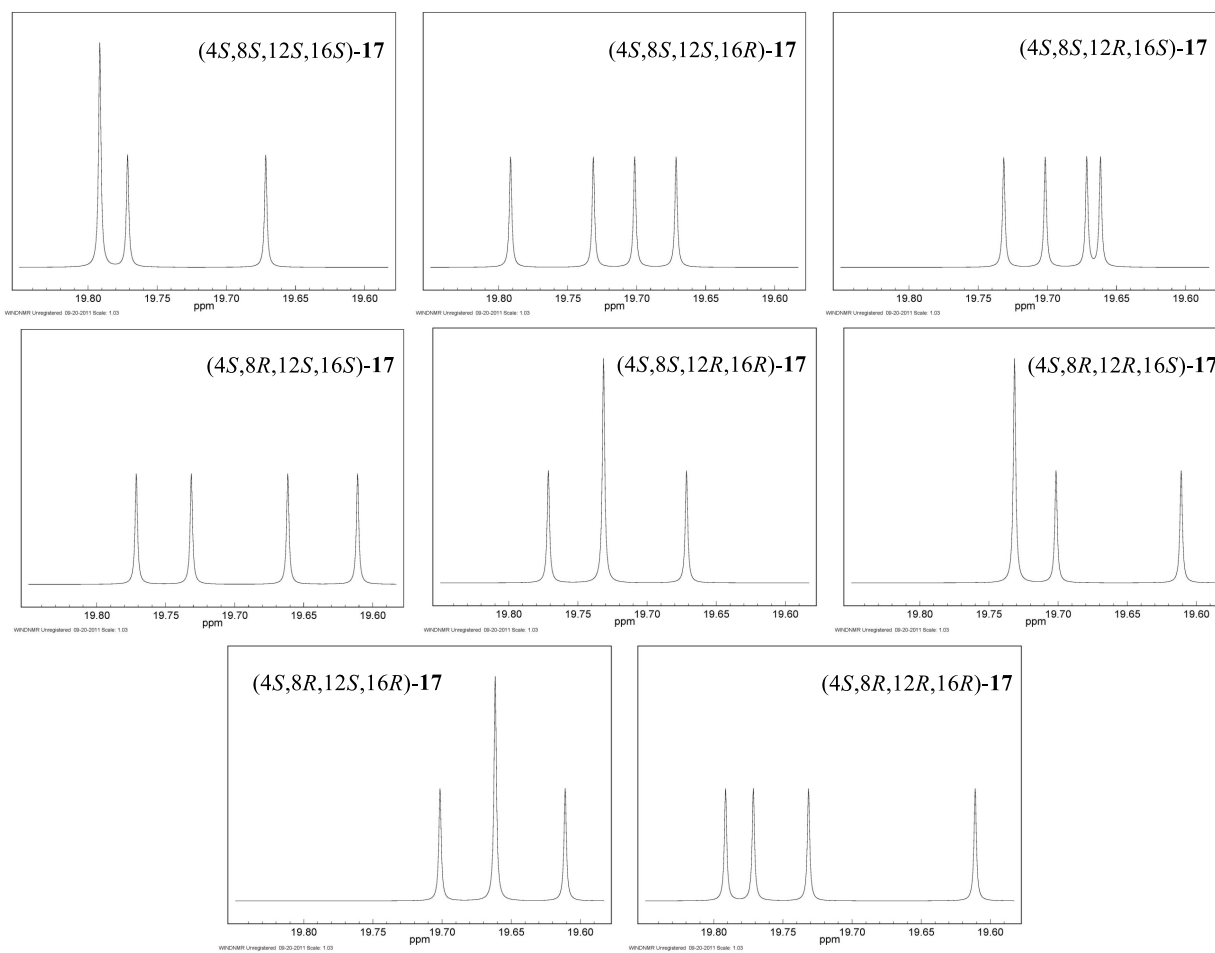

**Figure S2.** Predicted appearance of the methyl region of the  $^1\text{H}$  NMR spectra of all 2,6,10,14-tetramethylhenicosan-1-ol **17** stereoisomers.

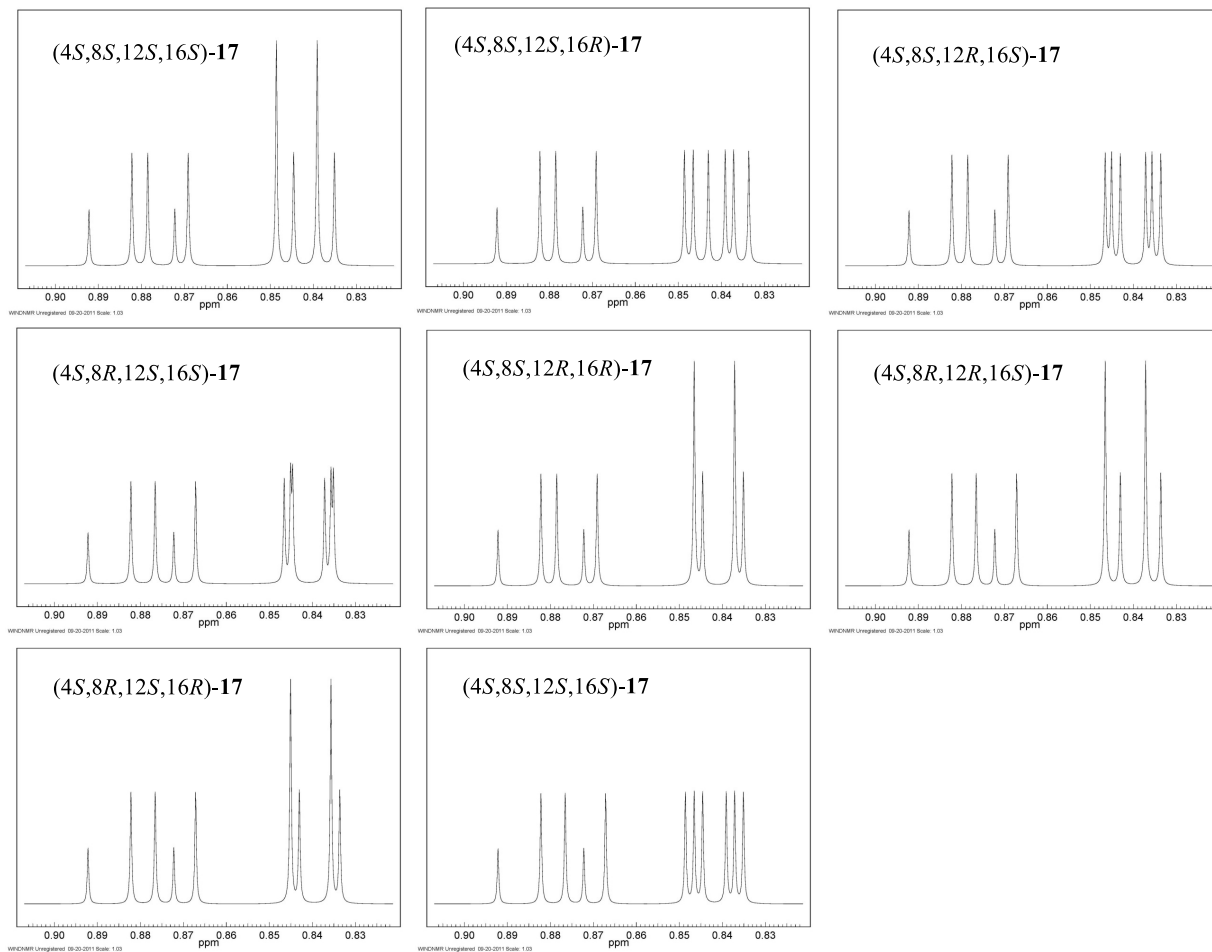



**Figure S3.** Predicted appearance of the branched-methyl region of the  $^{13}\text{C}$  NMR spectra of all 4,8,12,16,20-pentamethylheptacosan-1-ol **18** stereoisomers.

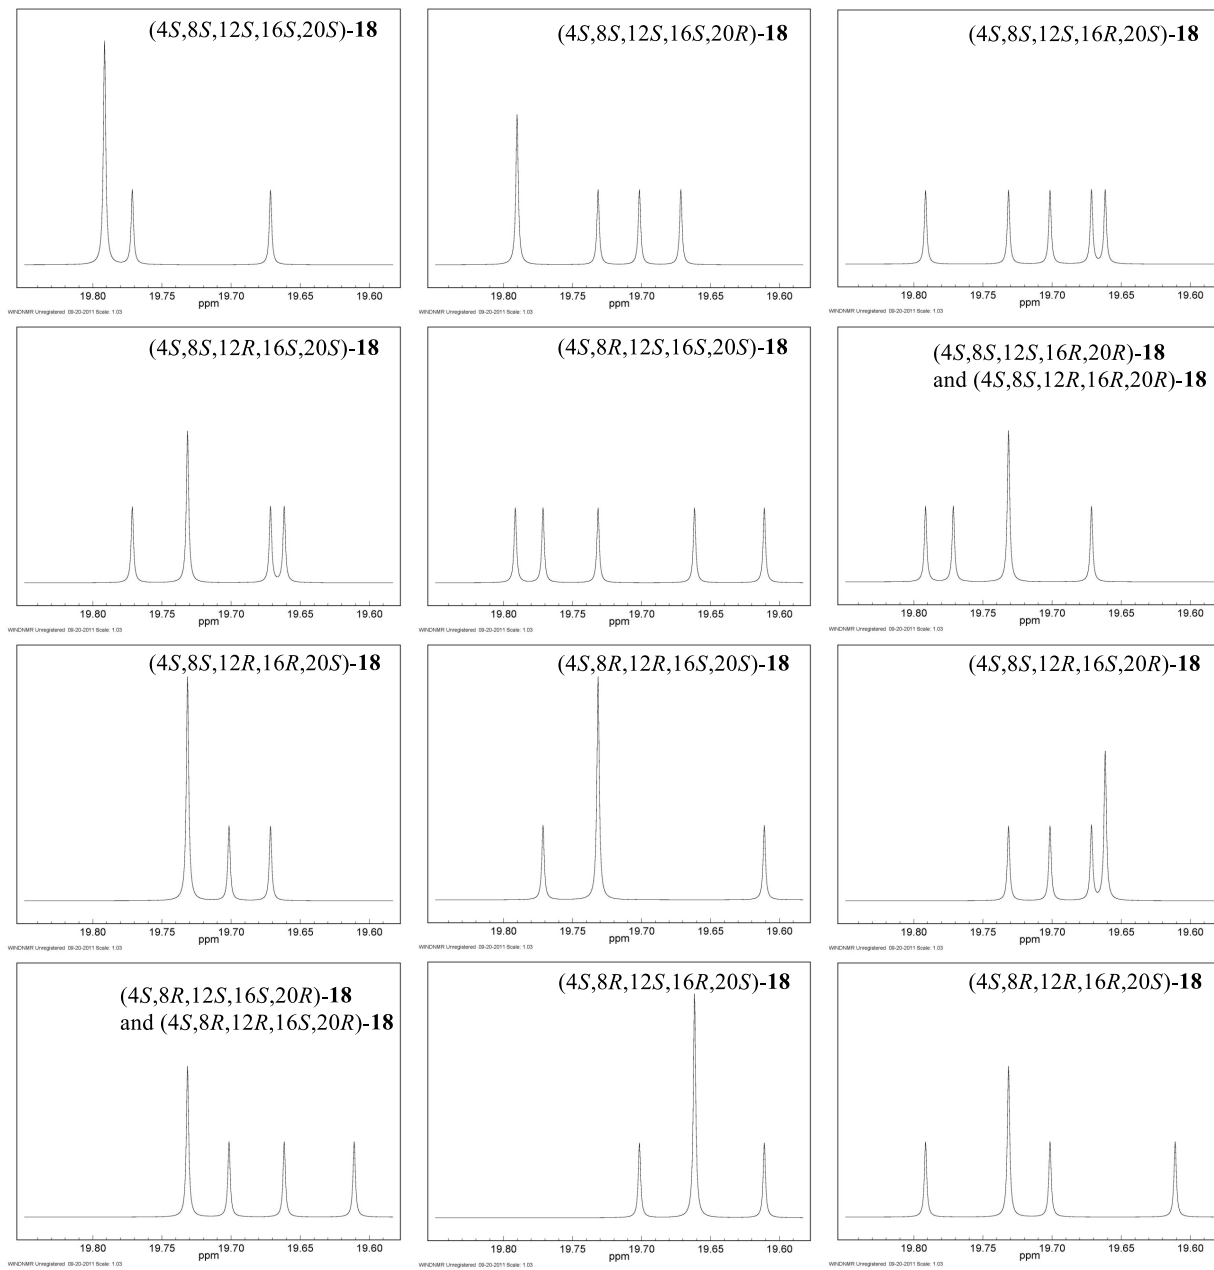

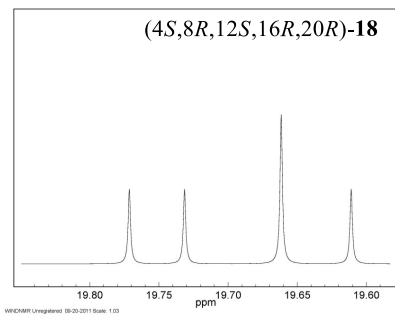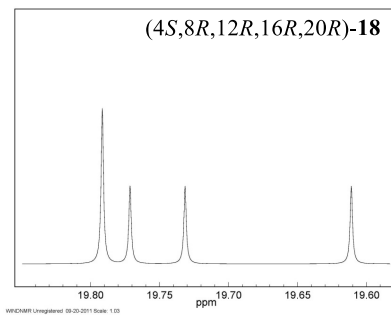

**Figure S4.** Predicted appearance of the methyl region of the  $^1\text{H}$  NMR spectra of all 4,8,12,16,20-pentamethylheptacosan-1-ol **18** stereoisomers.

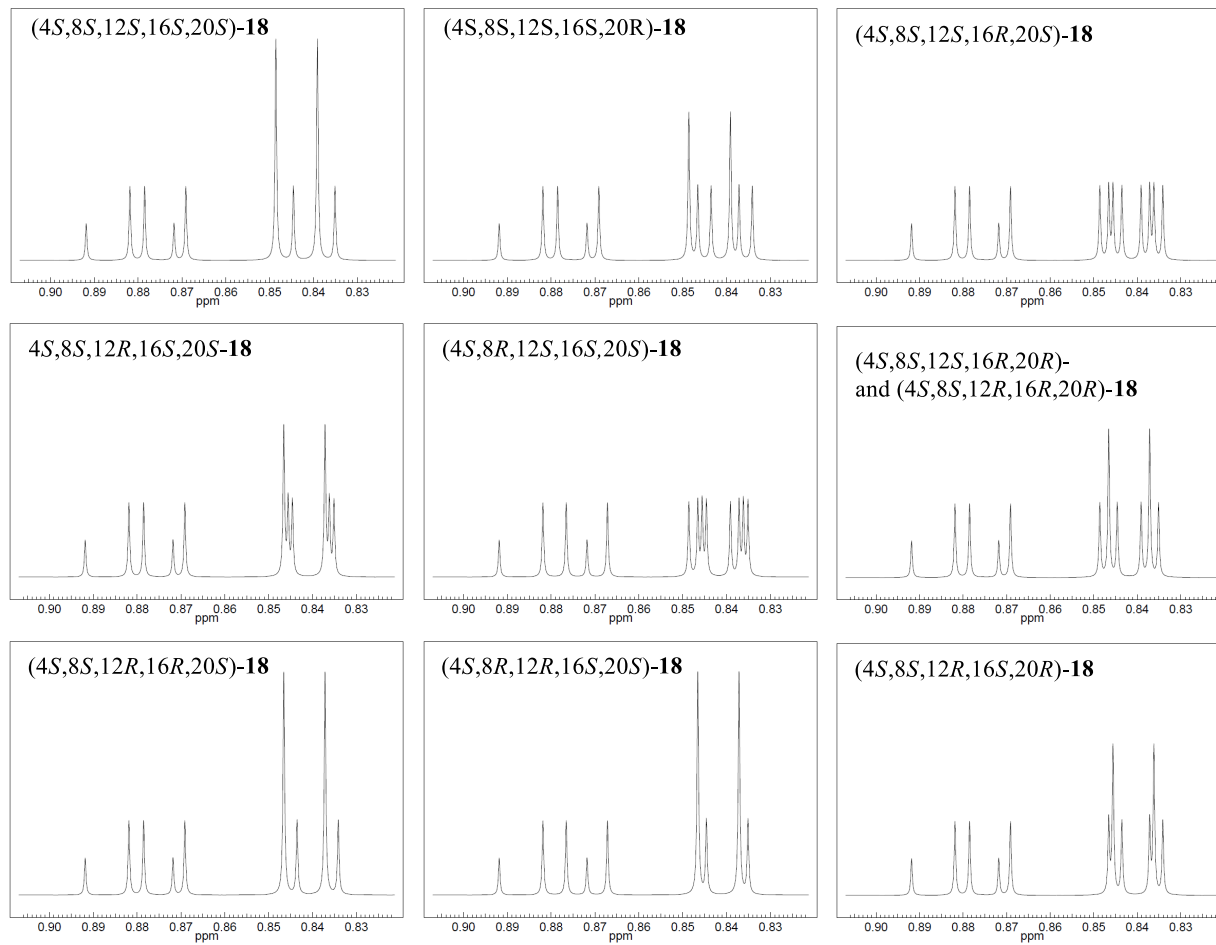

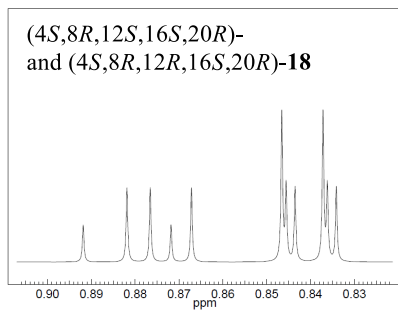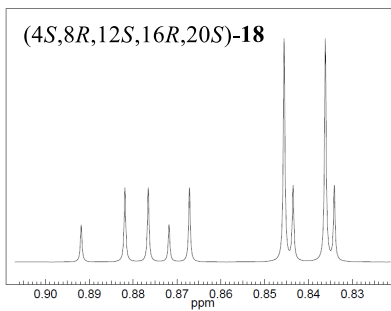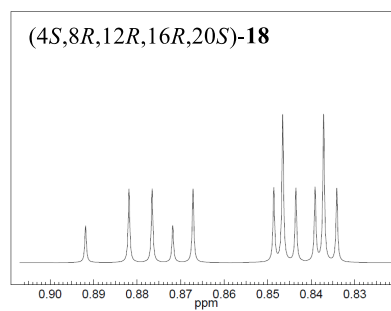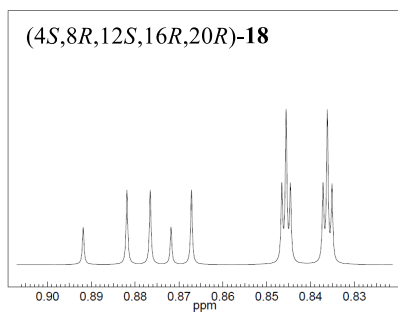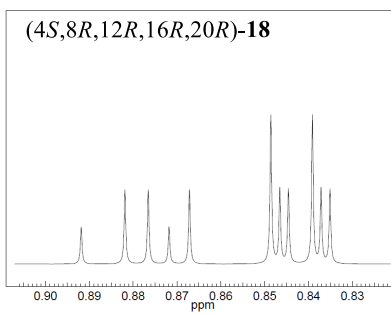

— 7.264

5.814  
5.787  
5.759  
5.725  
5.695  
5.134  
5.100  
5.078

— 3.387

2.262  
2.239  
2.216  
2.193  
2.171  
2.147  
1.656  
1.564  
1.550  
1.480  
1.417  
1.389  
1.288  
1.042  
1.019  
0.902  
0.882  
0.861

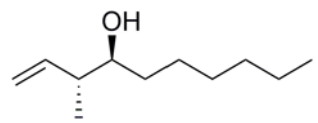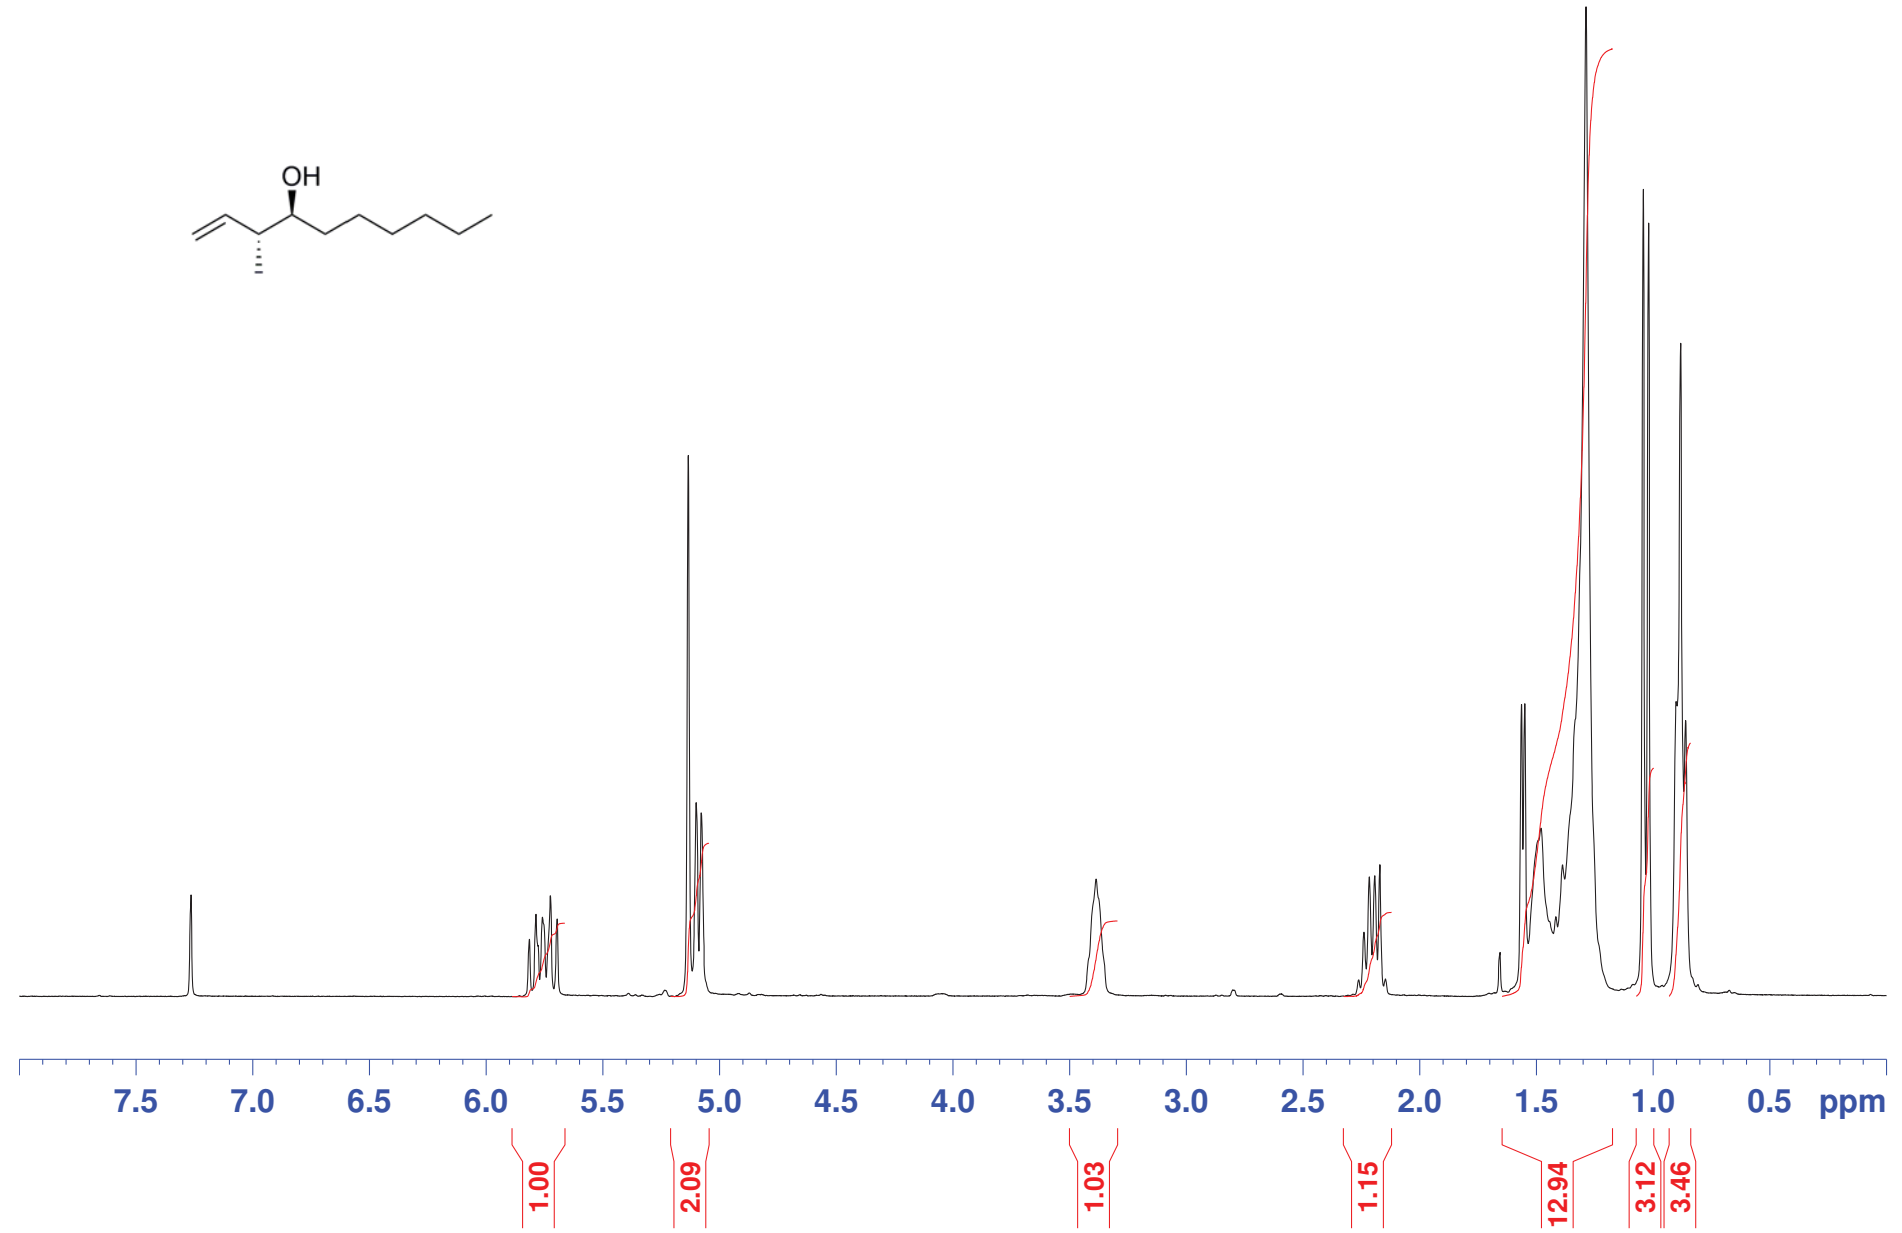

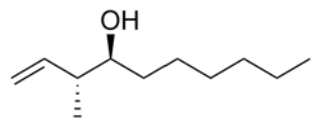

140.40  
116.27  
77.46  
77.03  
76.61  
74.70  
44.14  
34.26  
31.87  
29.42  
25.71  
22.66  
16.32  
14.11

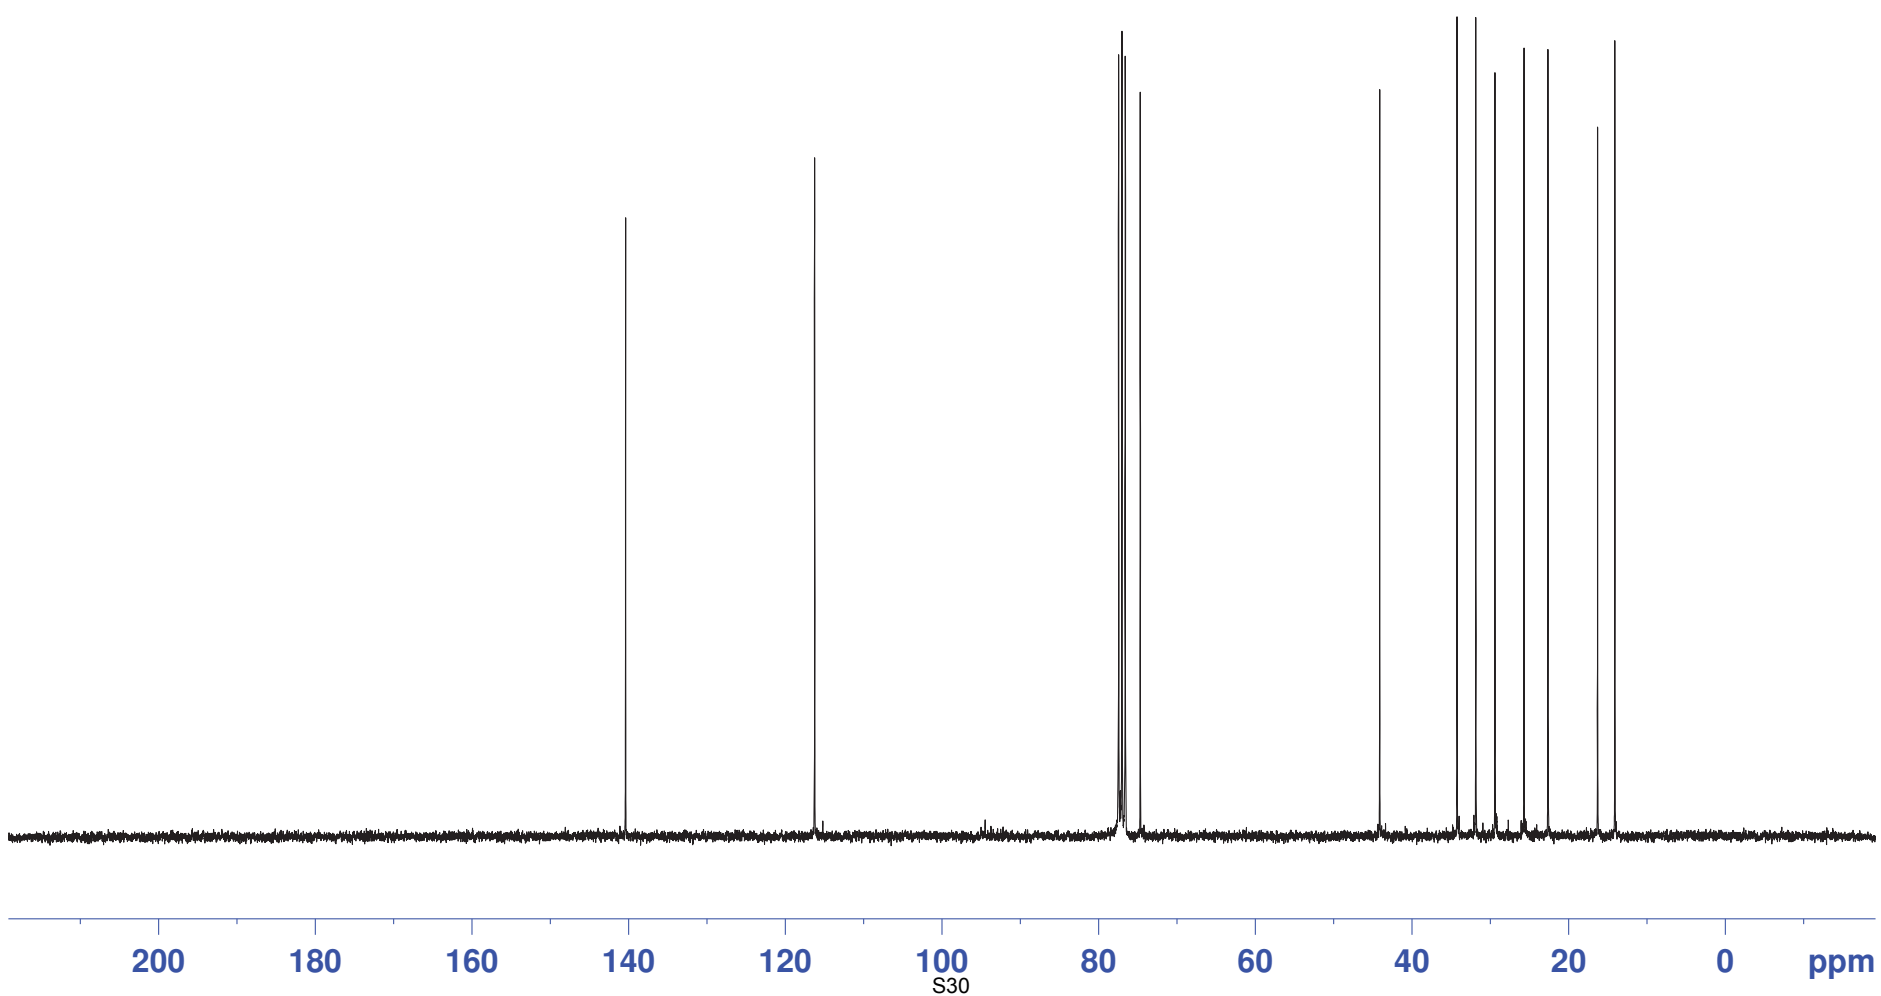

Yeh and coworkers

7.441  
7.415  
7.391  
7.310  
7.285  
7.260  
7.109  
7.083  
5.839  
5.810  
5.781  
5.754  
5.722  
5.398  
5.382  
5.369  
5.356  
5.341  
5.141  
5.120  
5.084

Trimethylnonadecanol stereoisomer library

2.680  
2.658  
2.638  
2.616  
2.174  
1.757  
1.732  
1.712  
1.683  
1.670  
1.651  
1.625  
1.578  
1.541  
1.340  
1.291  
1.110  
1.087  
0.891  
0.869  
0.000

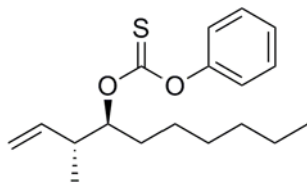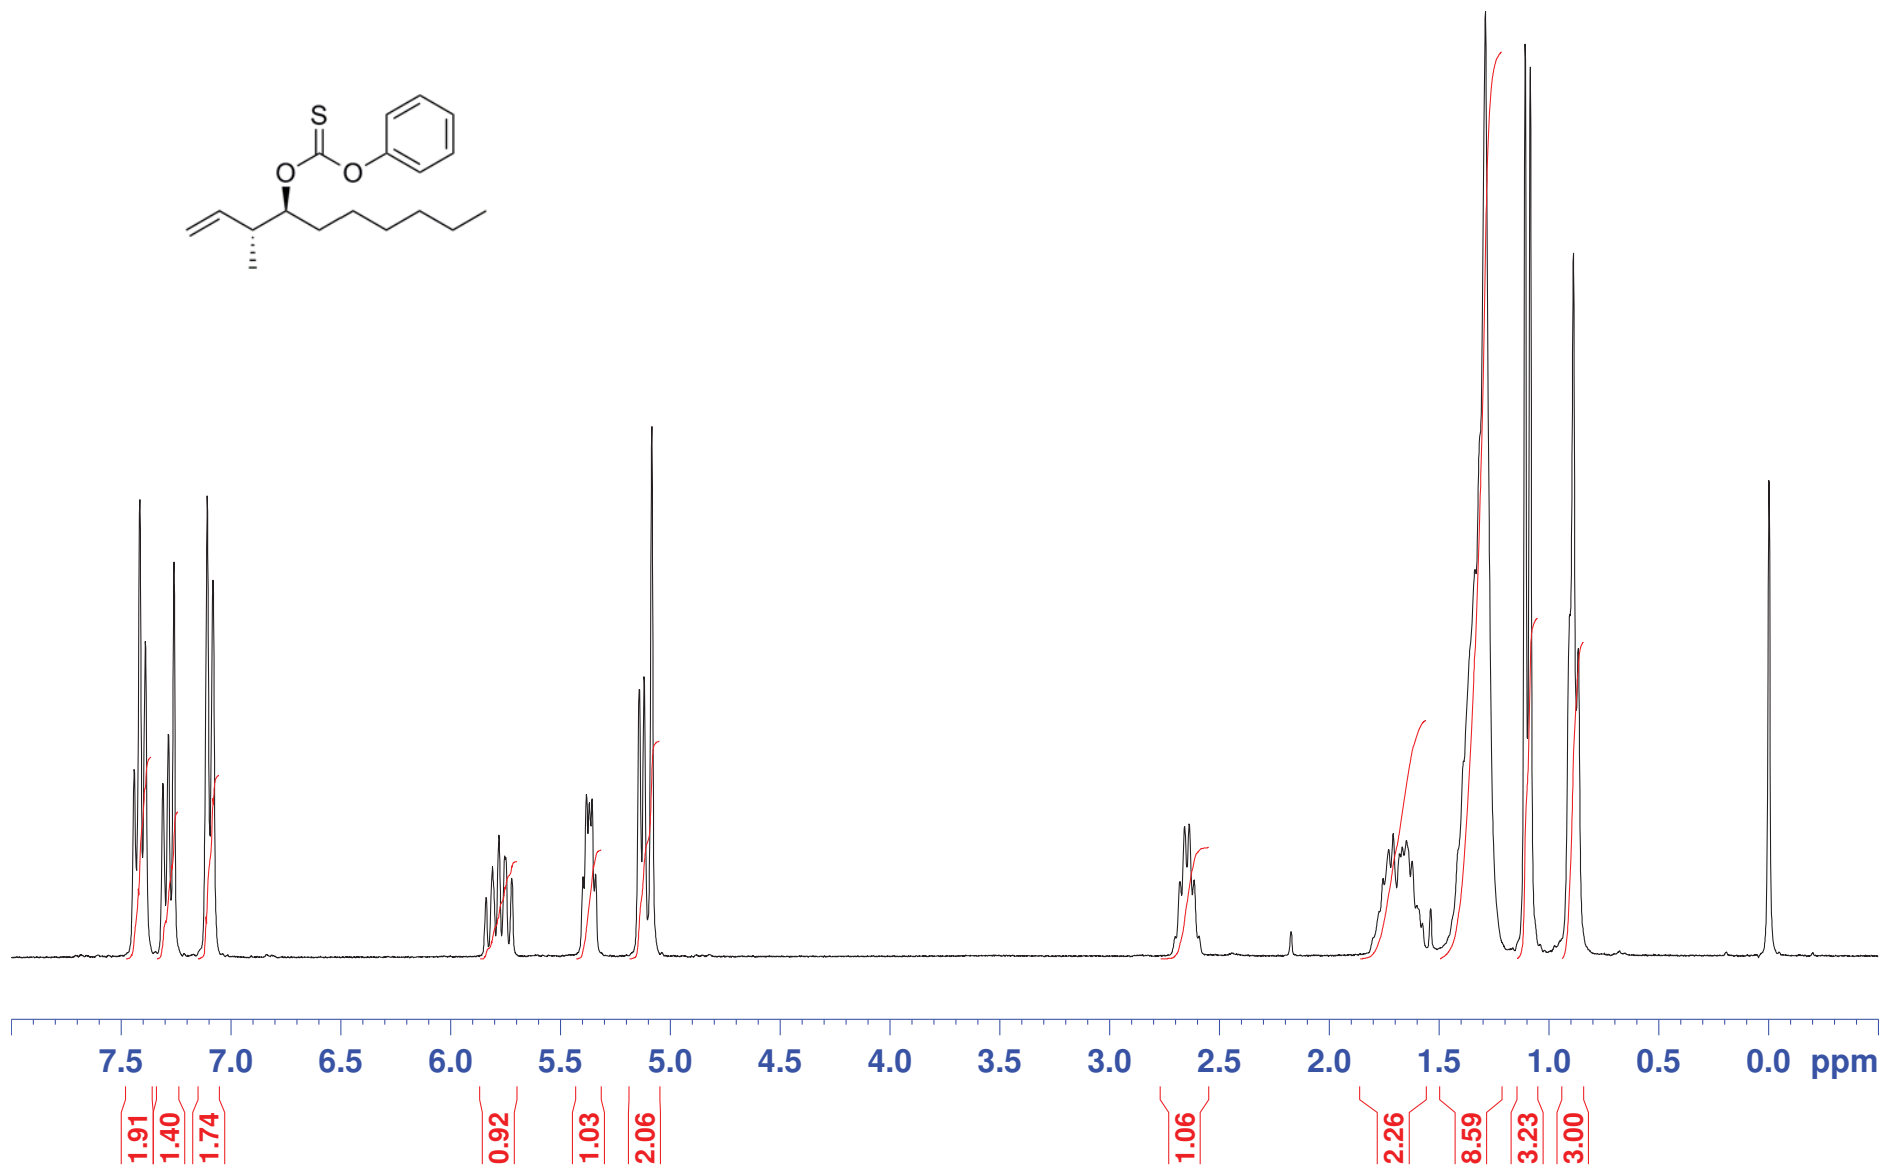

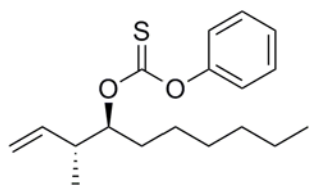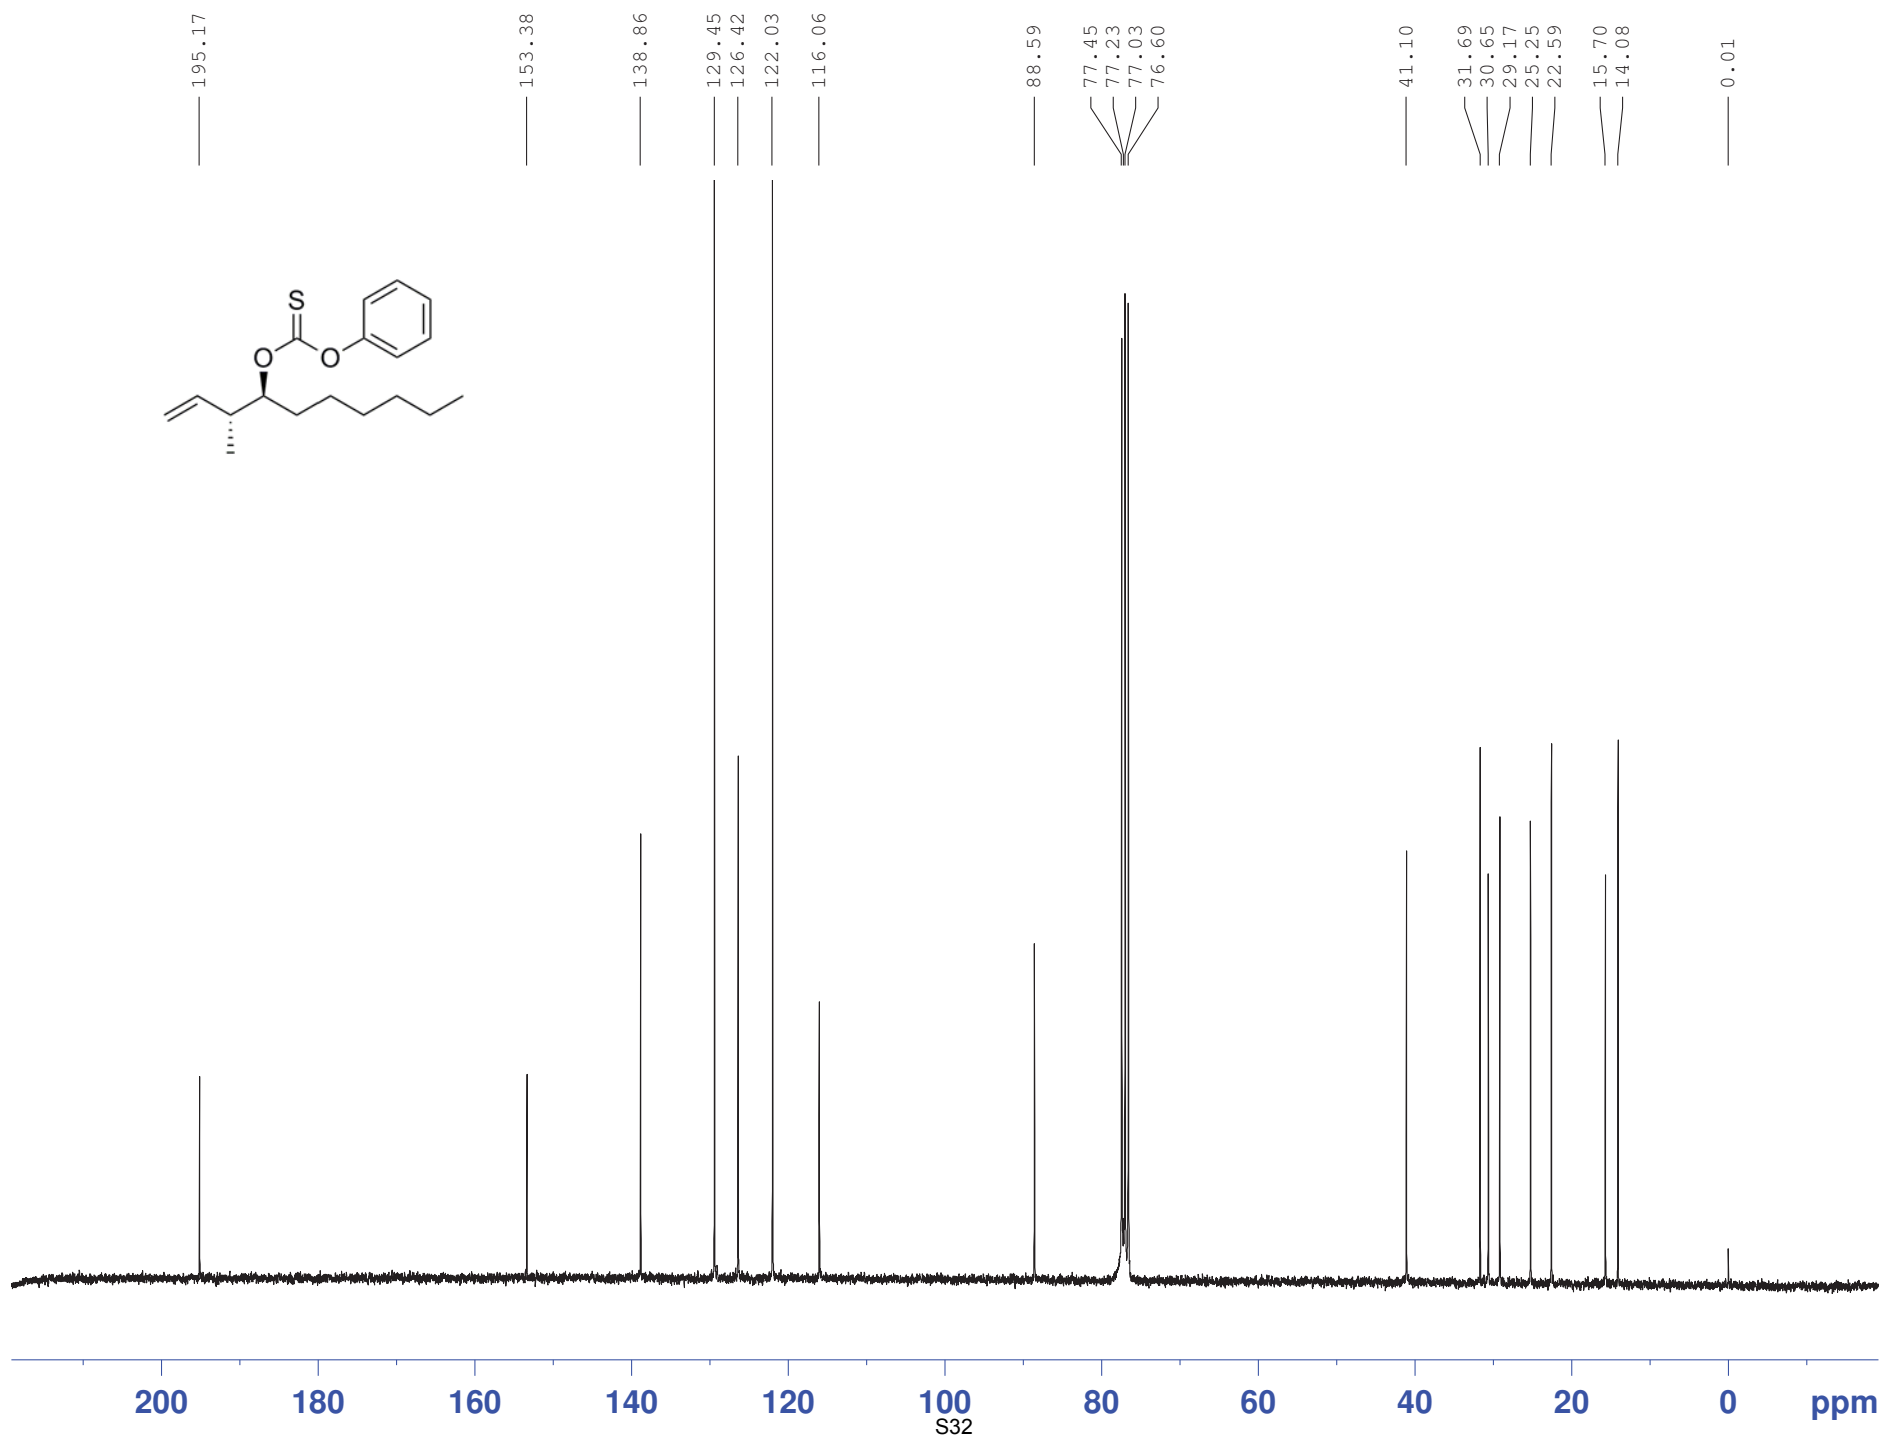



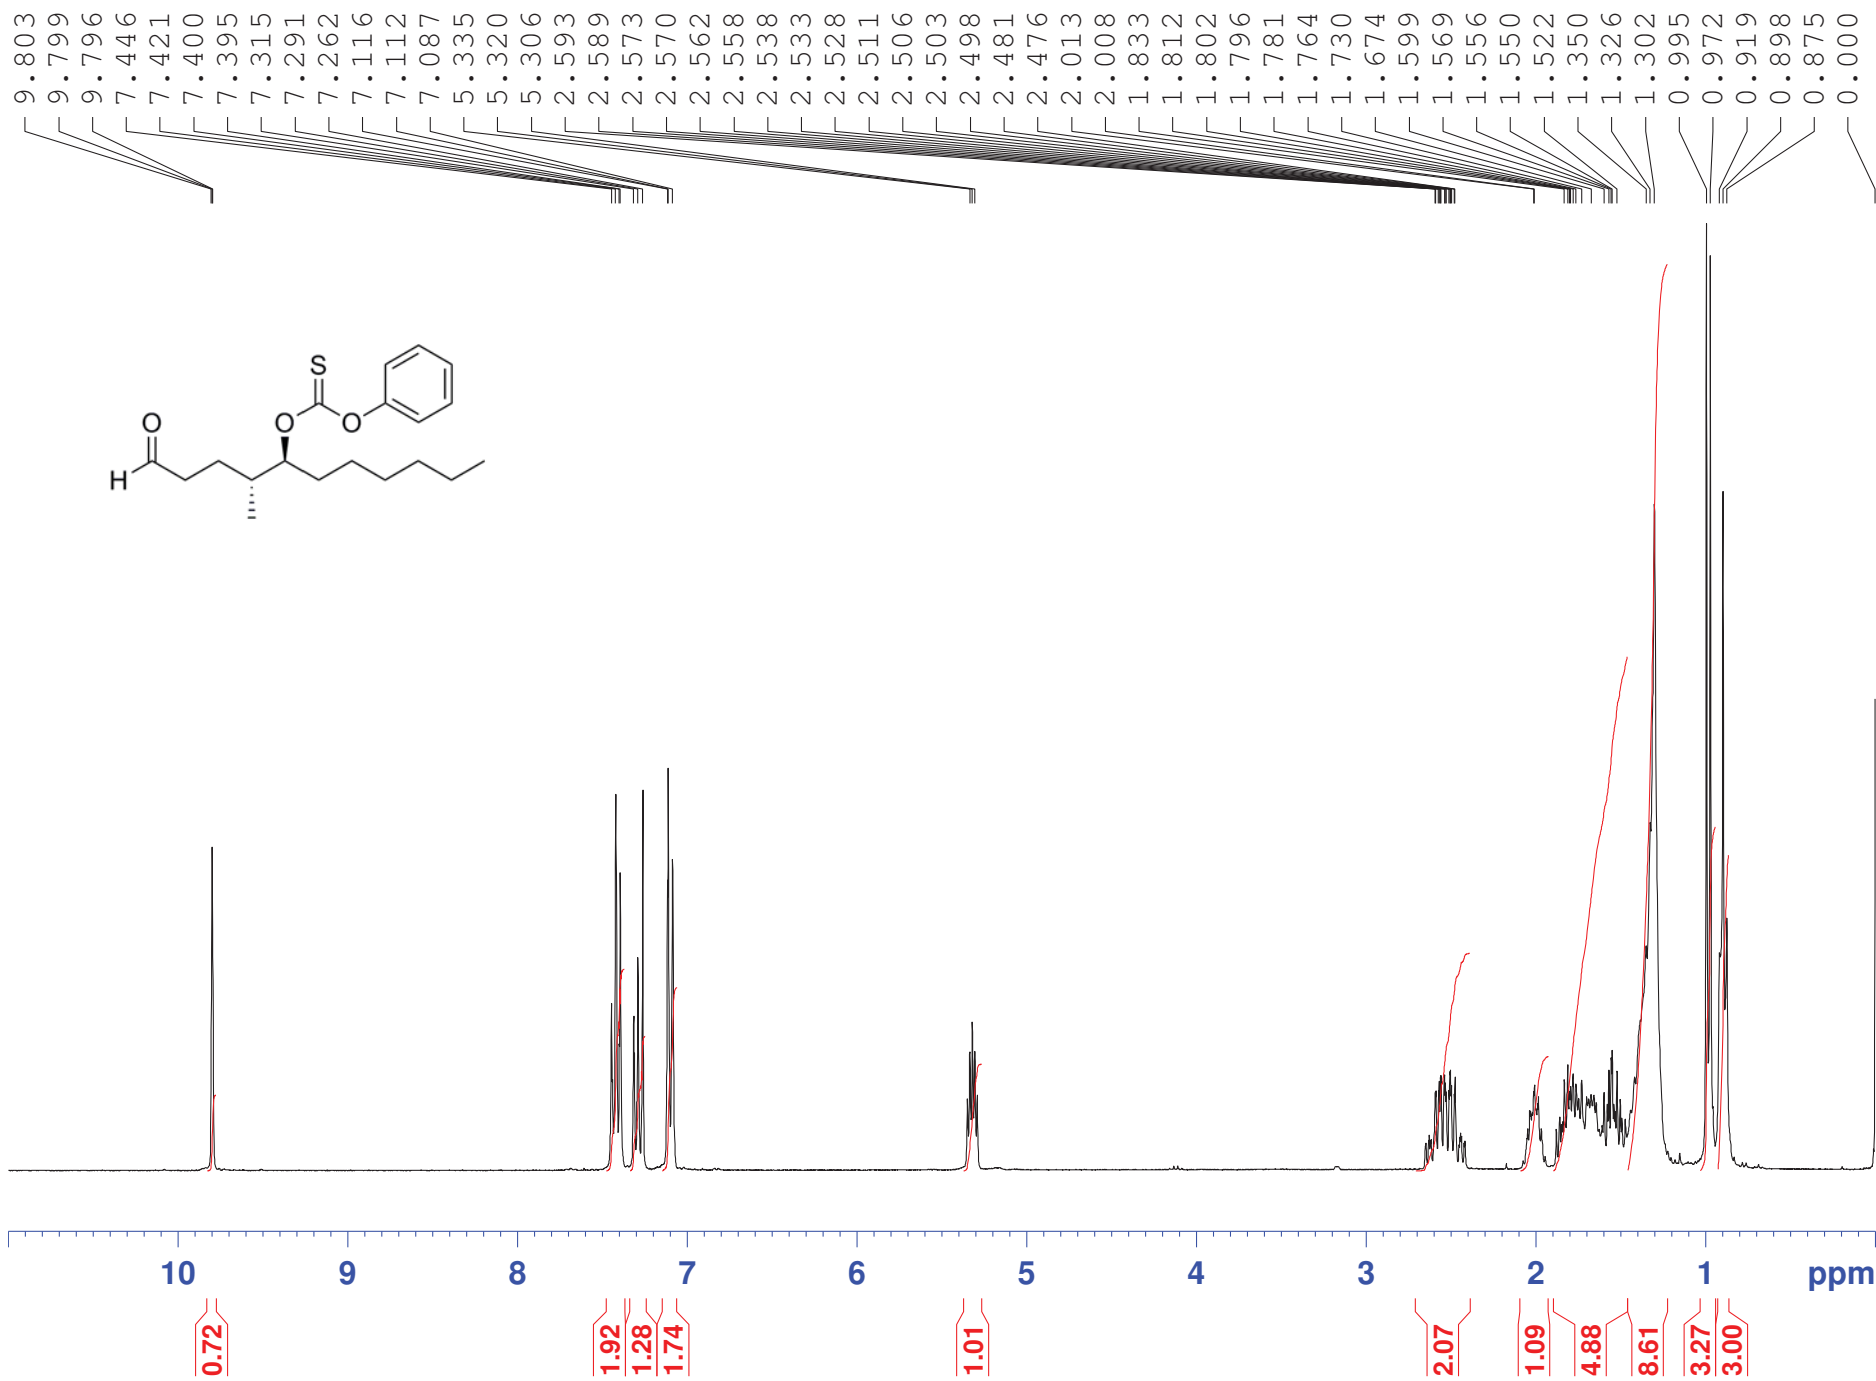

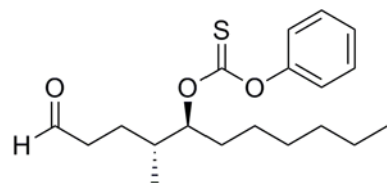

— 201.94

— 195.08

— 153.34

— 129.67

— 129.49

— 126.49

— 122.00

— 121.83

— 88.98

— 77.54

— 77.12

— 76.69

— 41.56

— 35.32

— 34.68

— 31.70

— 31.61

— 29.69

— 29.22

— 25.33

— 24.19

— 22.67

— 22.60

— 14.92

— 14.15

— 14.10

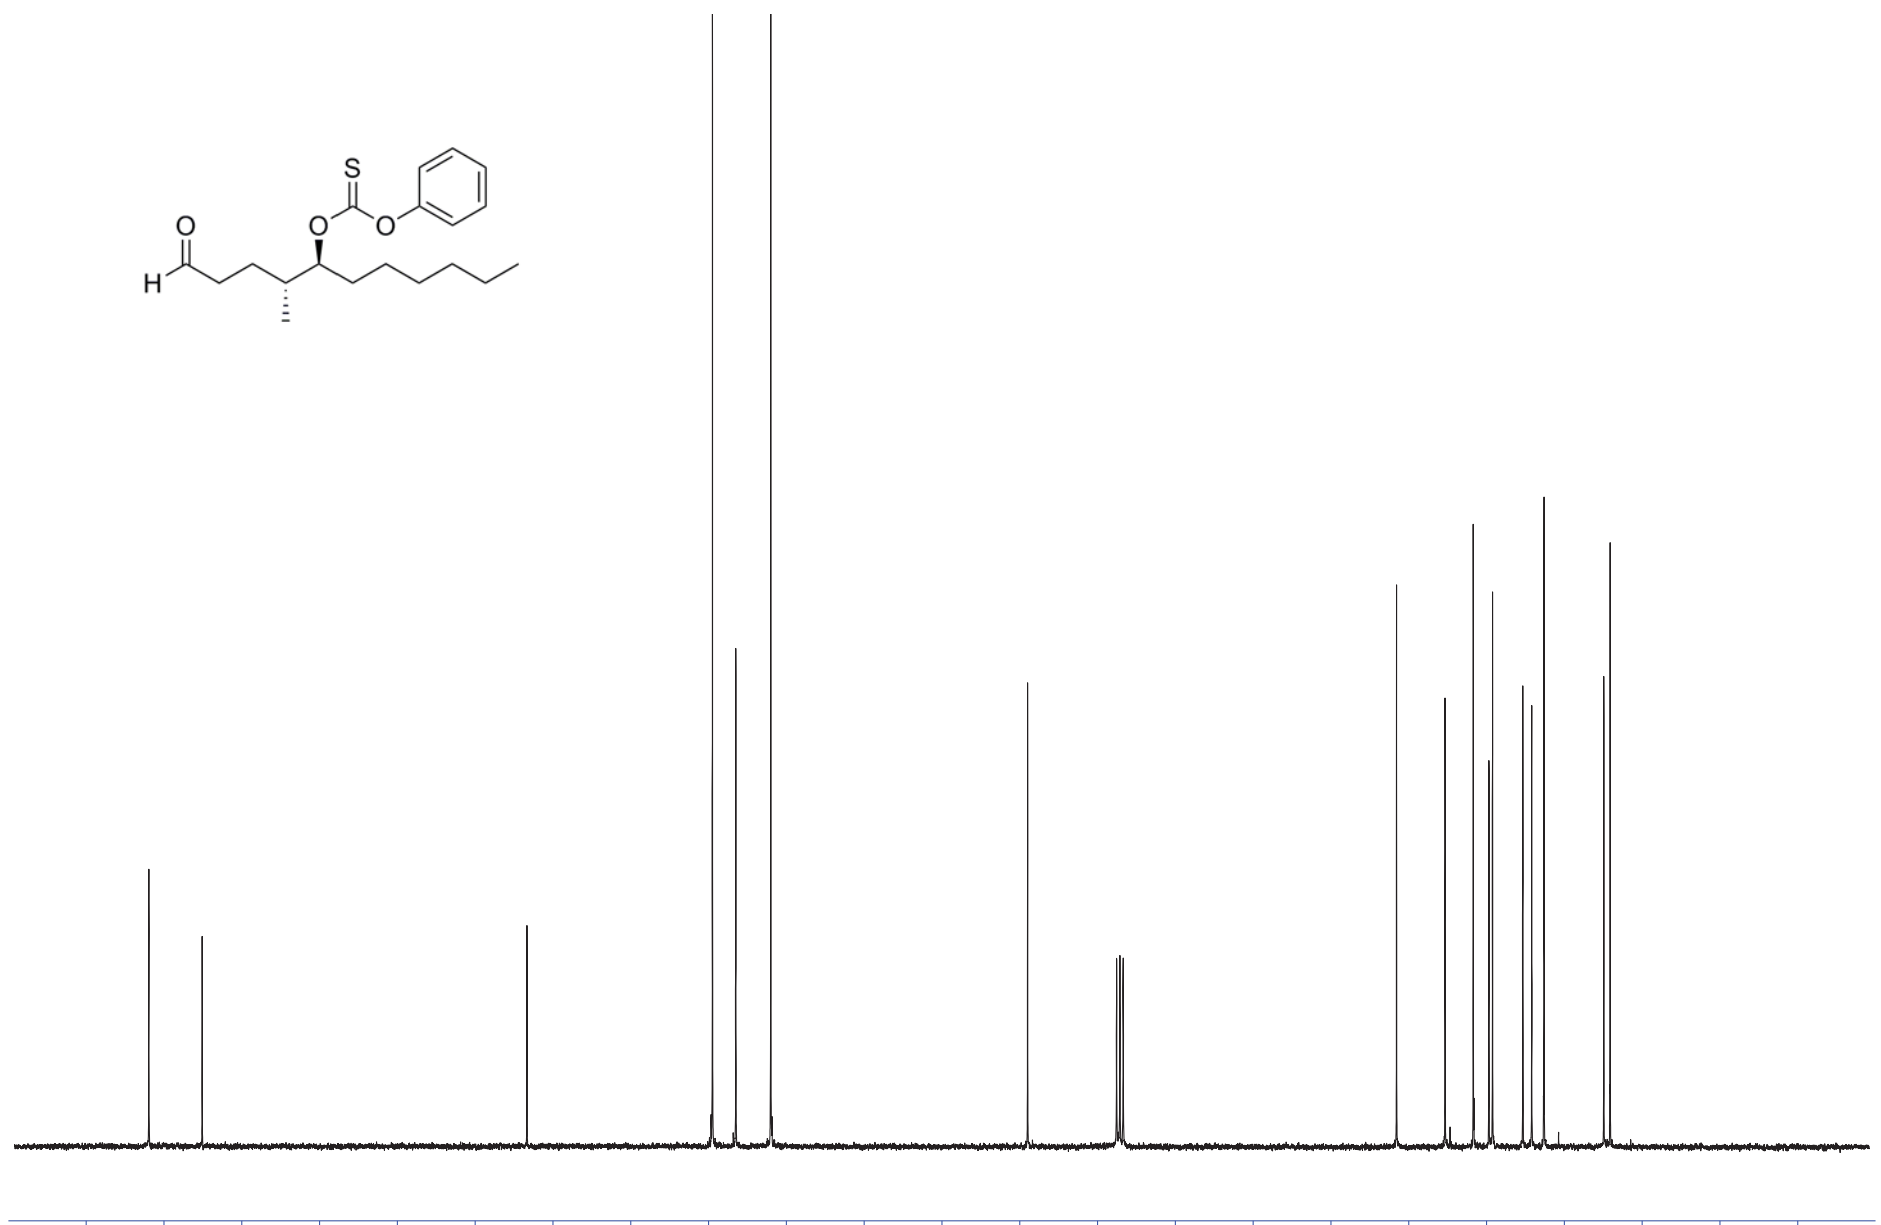

200

180

160

140

120

100

80

60

40

20

0

ppm

Yeh and coworkers

7.438  
7.413  
7.389  
7.306  
7.281  
7.259  
7.115  
7.089

5.811  
5.781  
5.753  
5.725  
5.691  
5.347  
5.149  
5.117  
5.092

Trimethylnonadecanol stereoisomer library

3.394  
2.251  
2.229  
2.206  
2.183  
2.010  
1.685  
1.660  
1.592  
1.573  
1.517  
1.368  
1.300  
1.257  
1.226  
1.192  
1.054  
1.031  
0.988  
0.965  
0.896  
0.878  
0.000

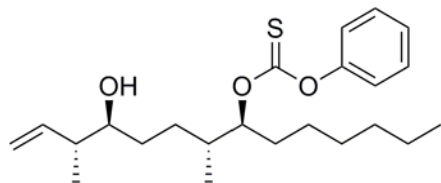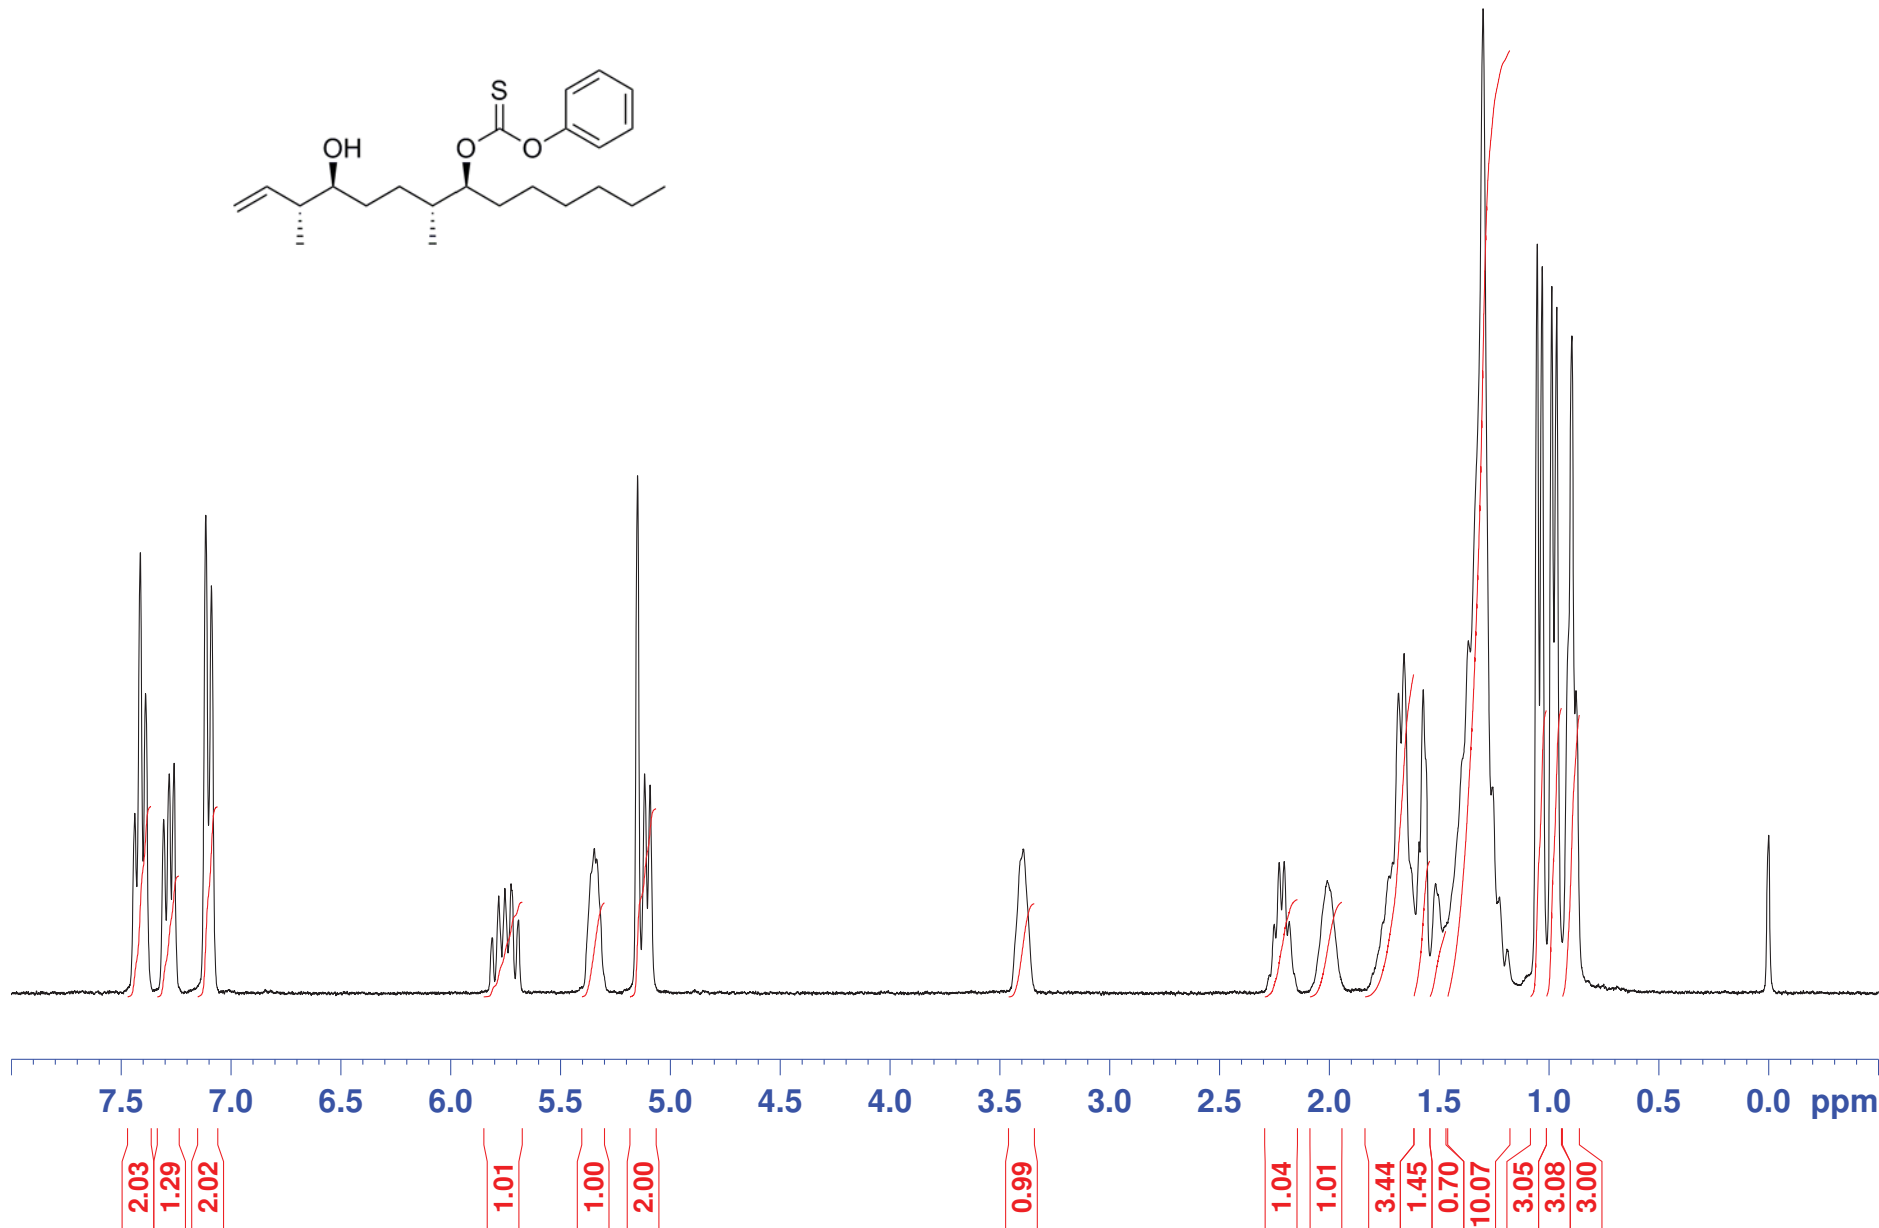

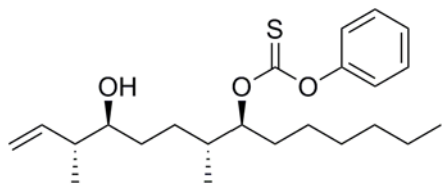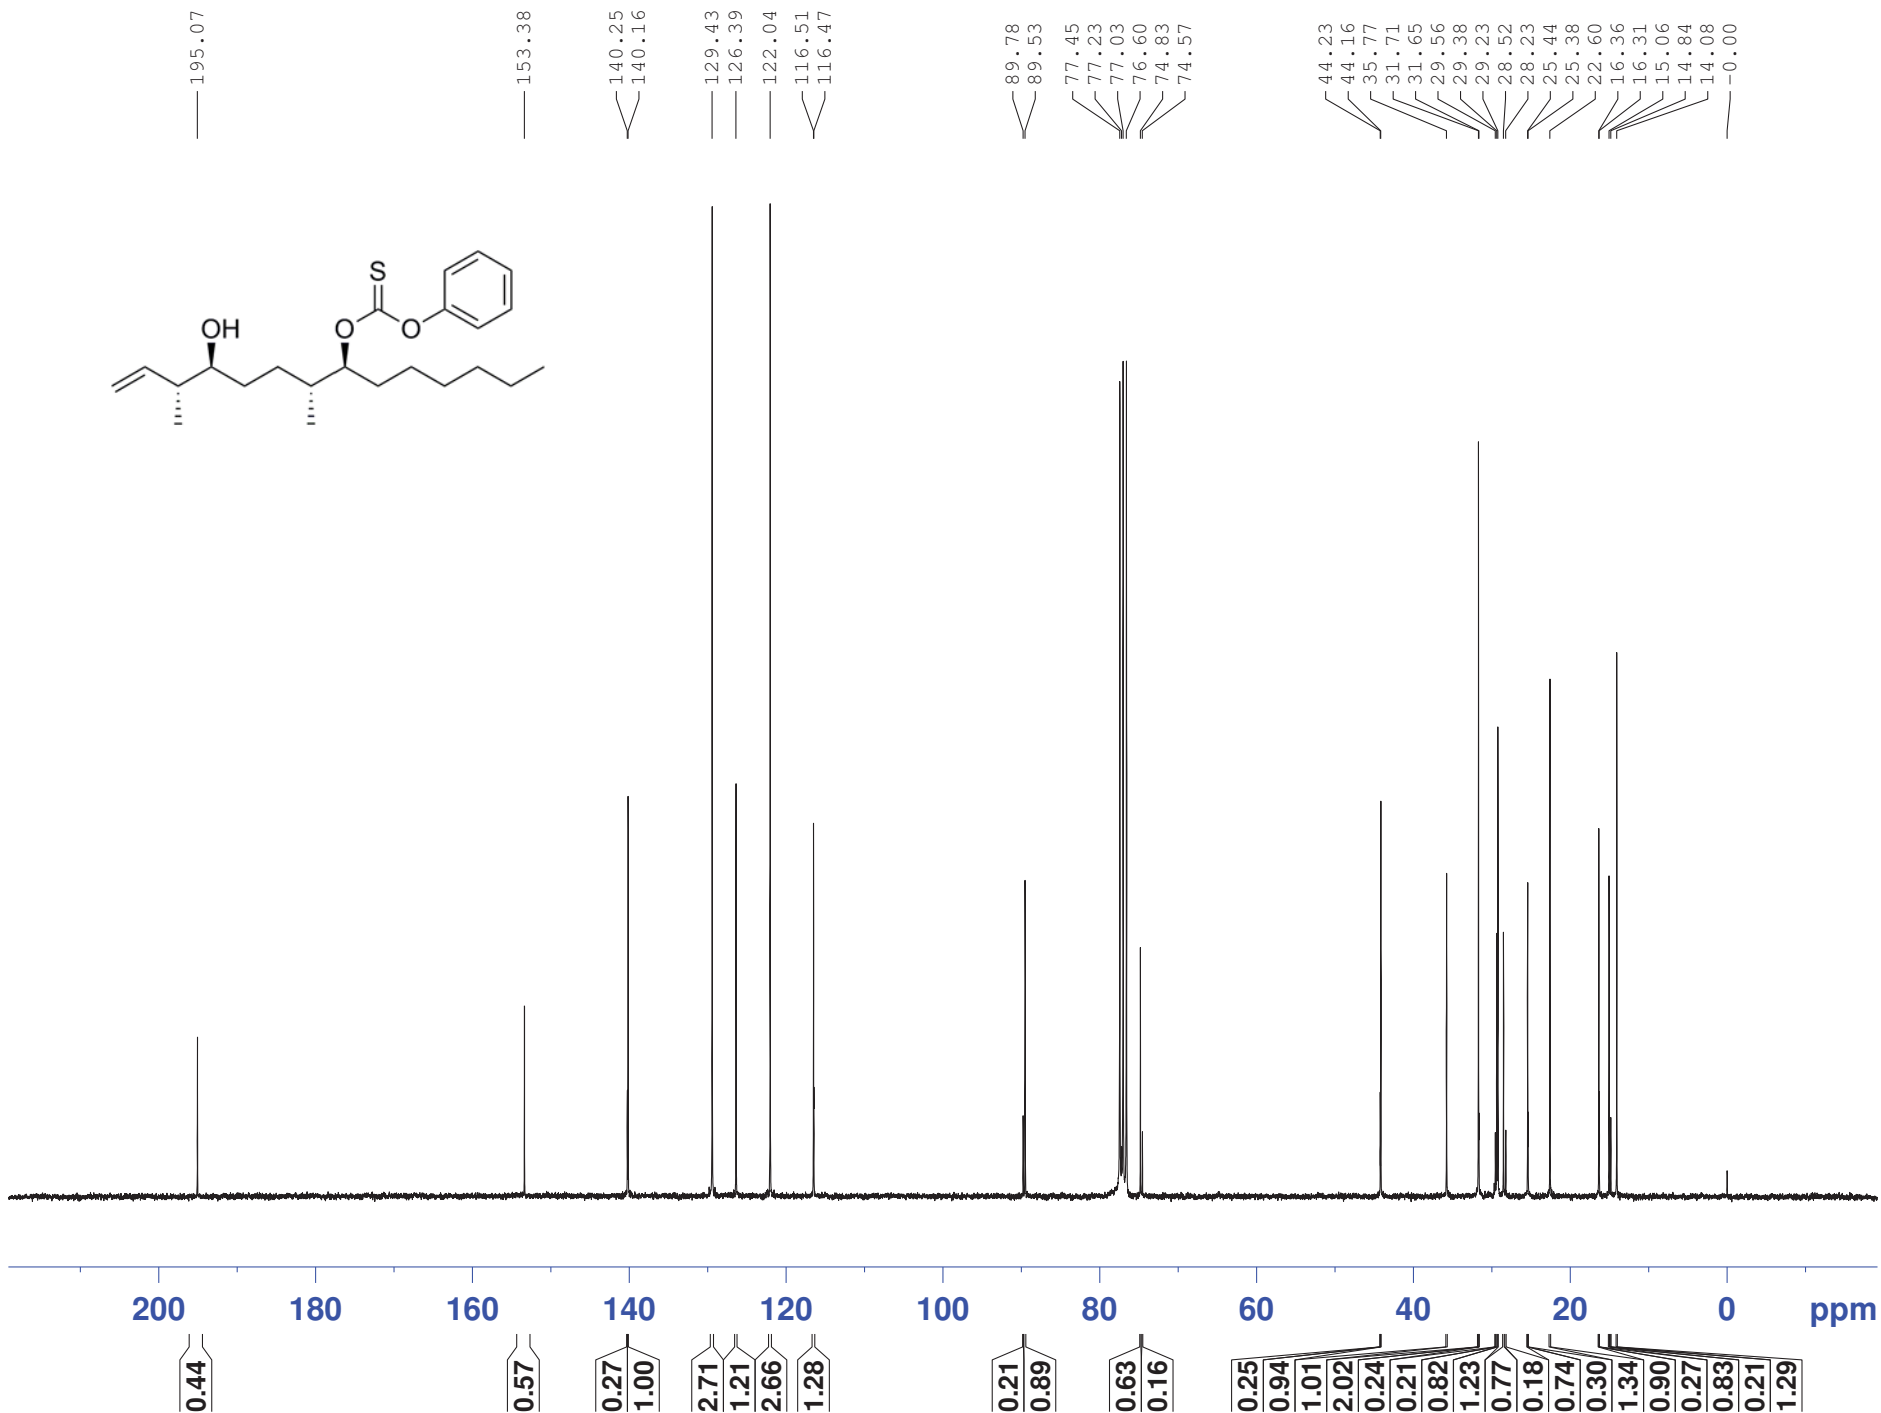

Yeh and coworkers

7.435  
7.410  
7.386  
7.303  
7.279  
7.257  
7.114  
7.088

5.809  
5.779  
5.752  
5.724  
5.691  
5.340  
5.327  
5.146  
5.113  
5.090

Trimethylnonadecanol stereoisomer library

3.389

2.247  
2.224  
2.201  
2.180  
1.994  
1.713  
1.682  
1.659  
1.581  
1.515  
1.300  
1.050  
1.028  
0.982  
0.960  
0.896  
0.877

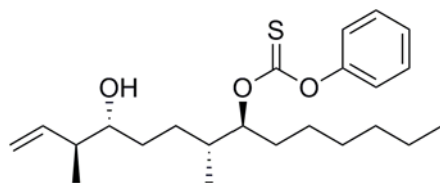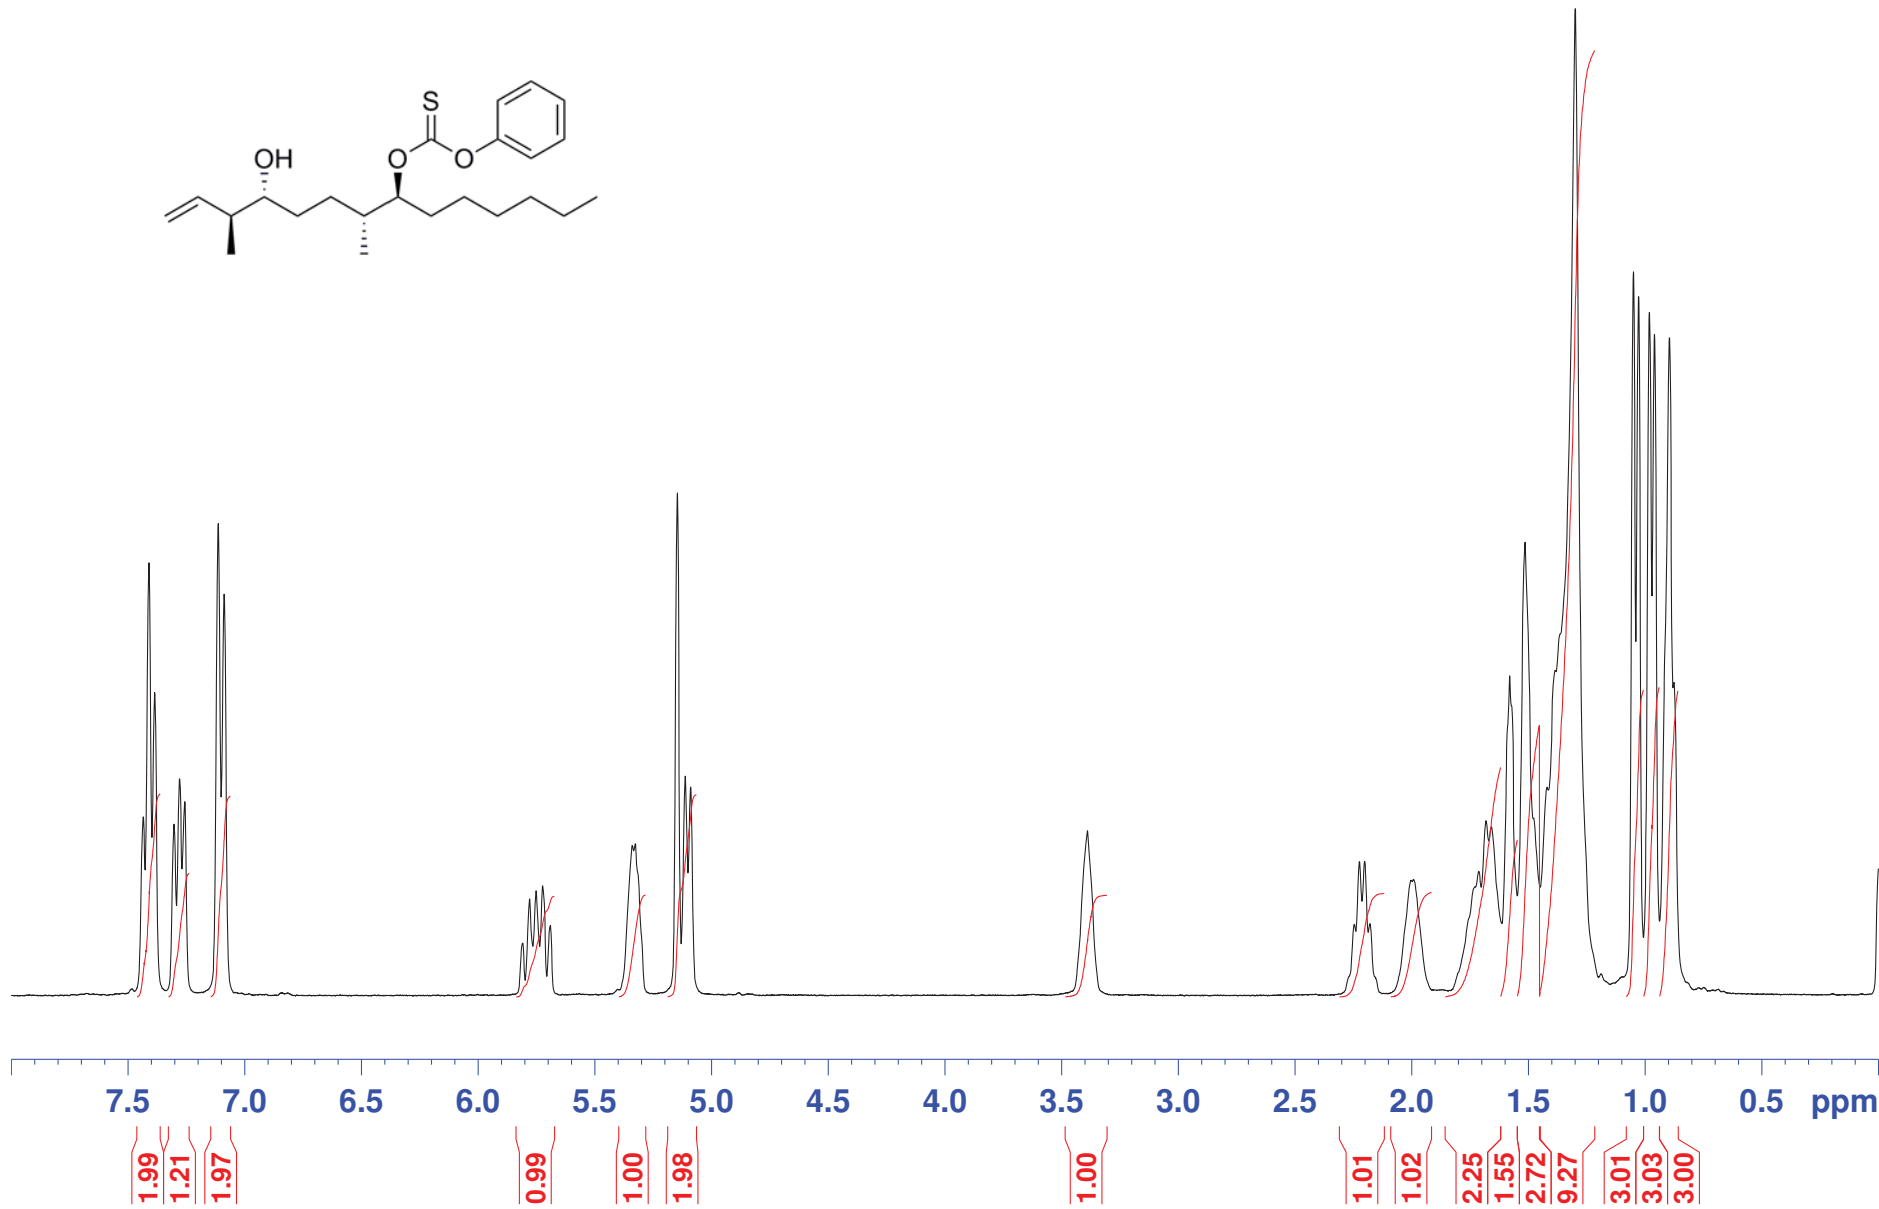

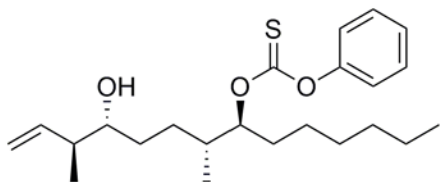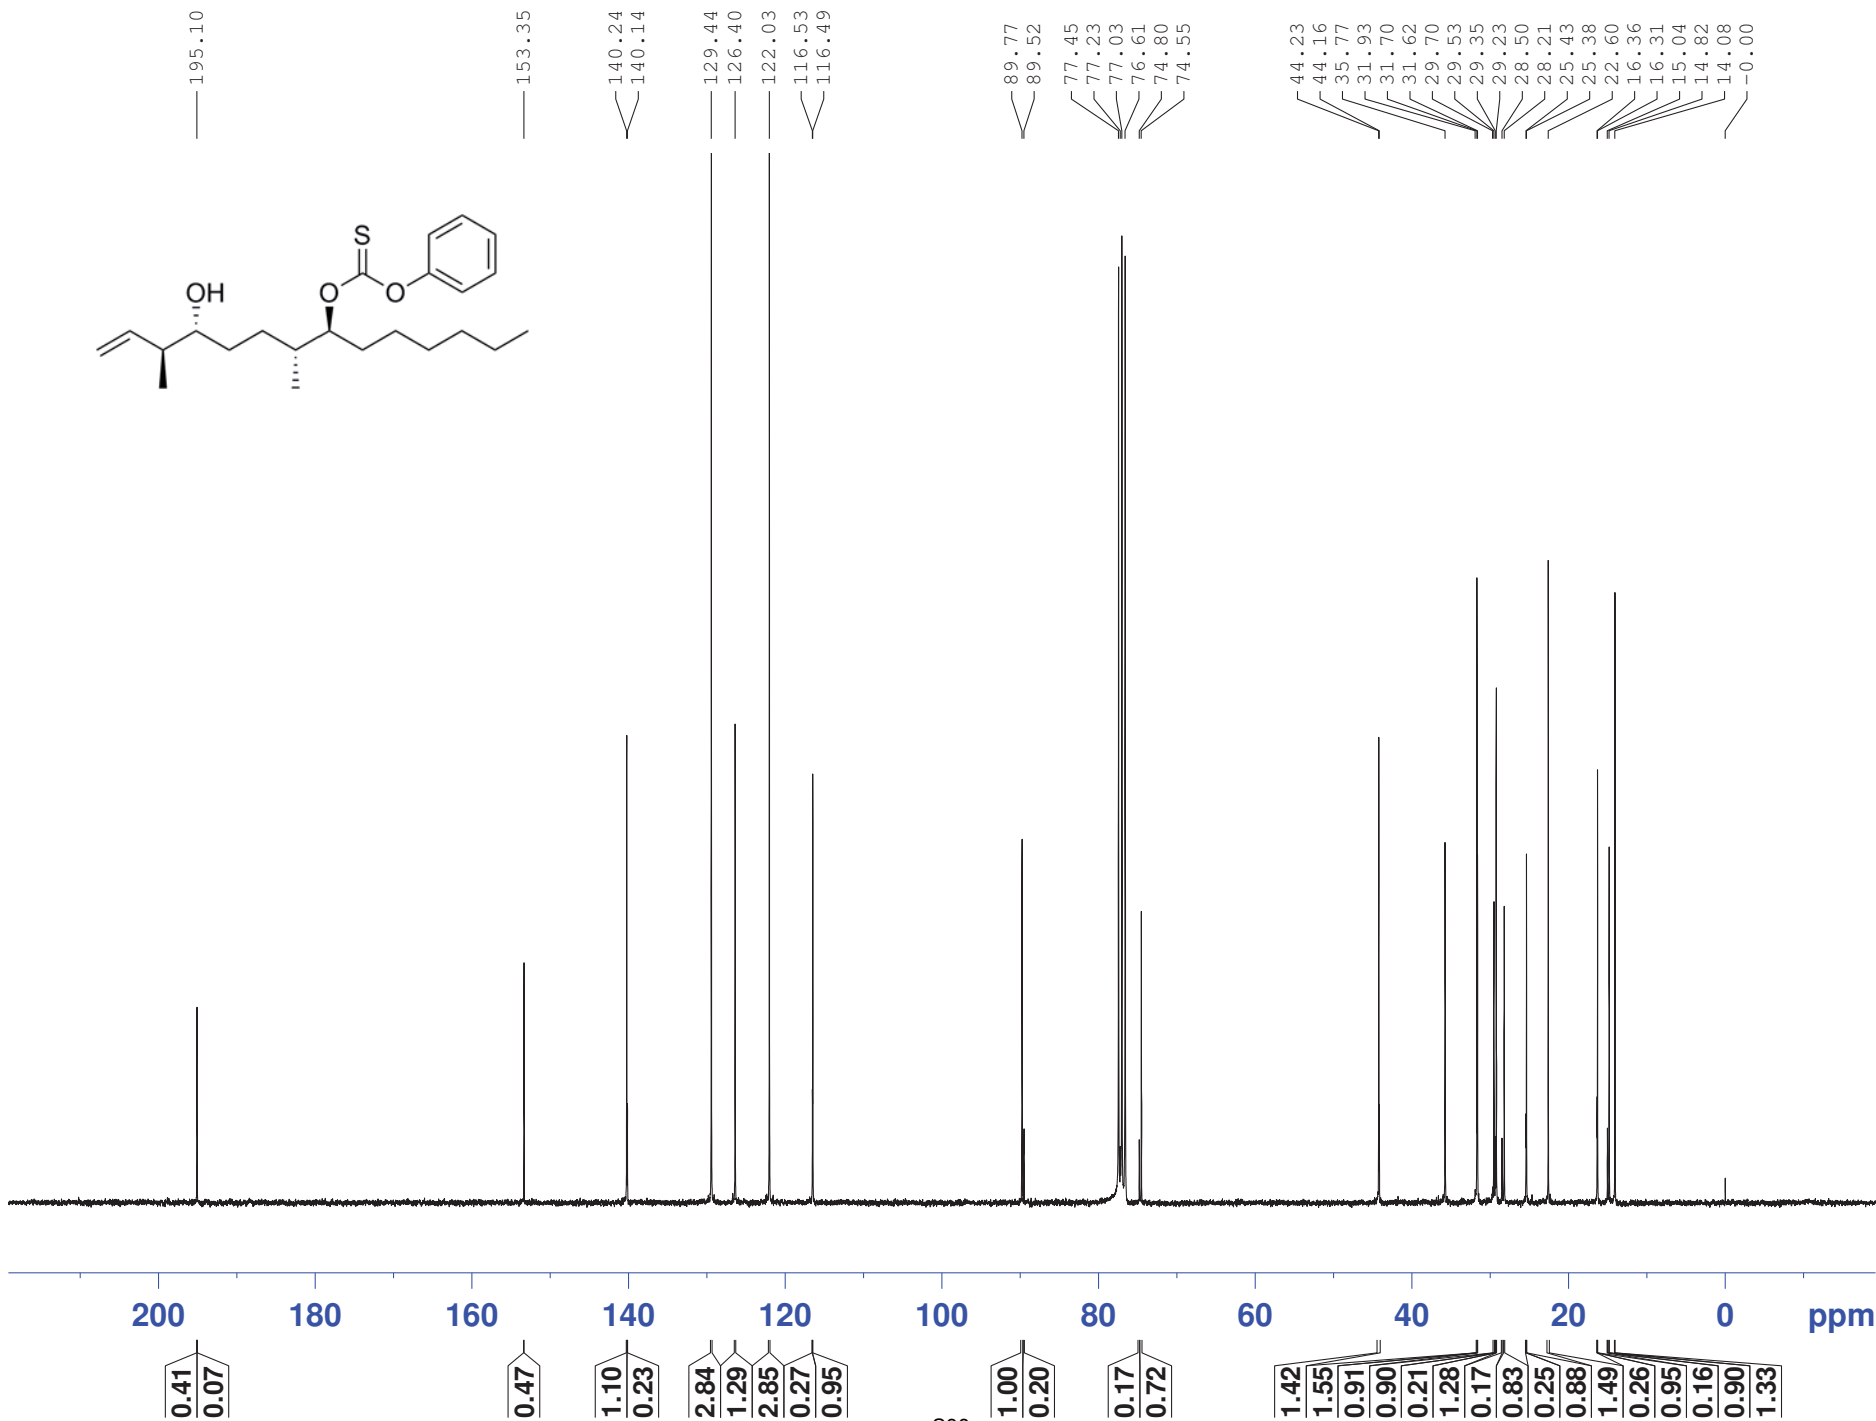

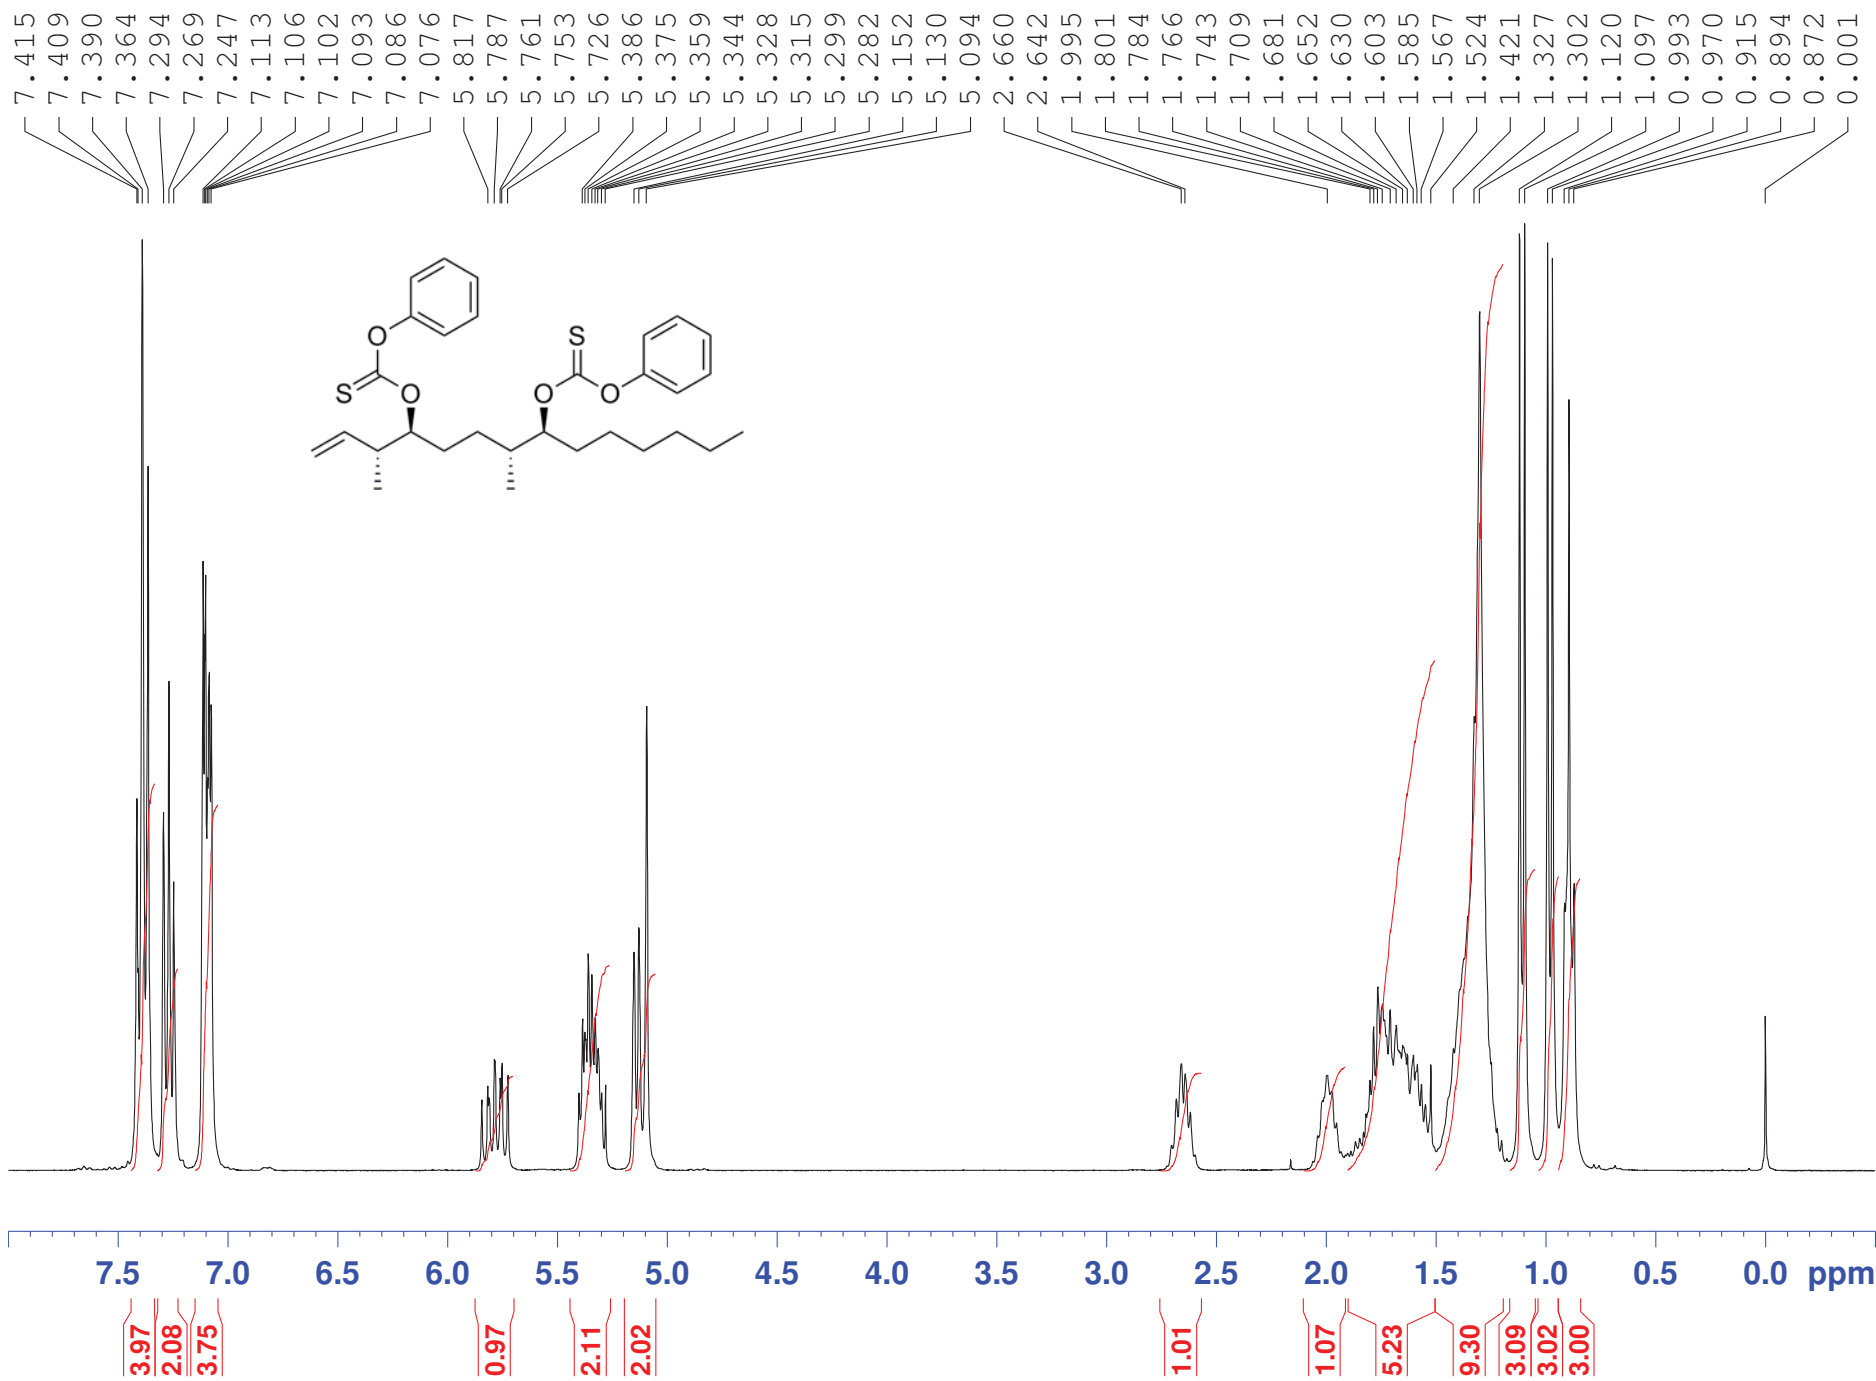

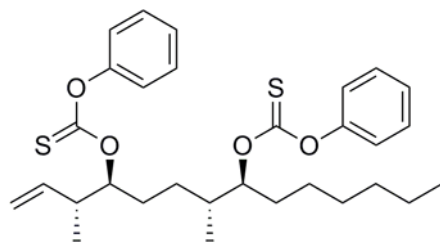

195.13  
195.10

153.33

138.72  
138.60

129.45  
126.45  
126.42  
122.04  
122.01  
116.29

89.35  
89.21  
88.42  
88.07  
77.46  
77.24  
77.04  
76.61

41.09  
35.81  
35.76  
31.70  
29.90  
29.77  
29.25  
28.26  
28.11  
27.92  
27.51  
25.26  
22.60  
15.78  
15.60  
15.07  
14.99  
14.09  
0.01

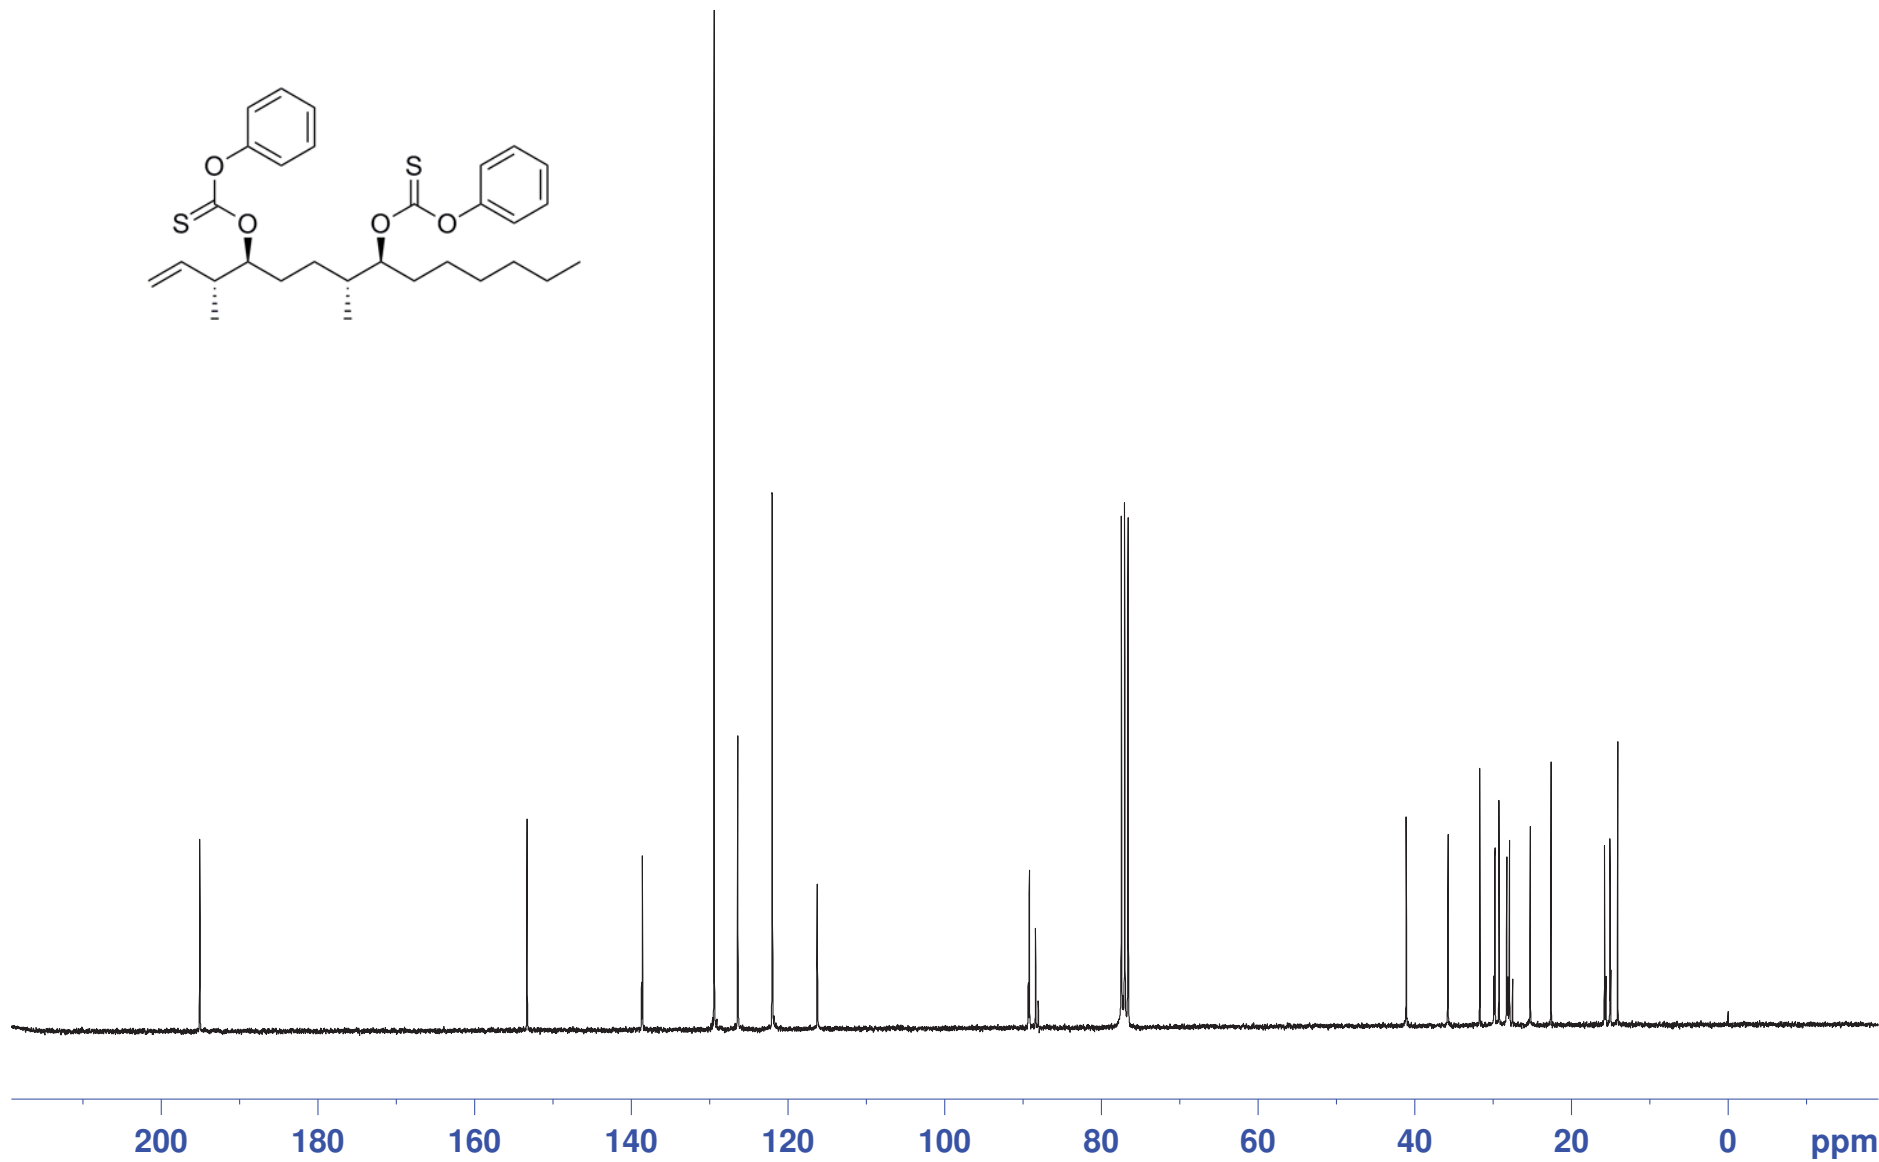

0.27  
1.35

0.42  
1.65  
1.00  
0.20

0.56  
1.77  
1.90  
0.53  
1.90  
0.43



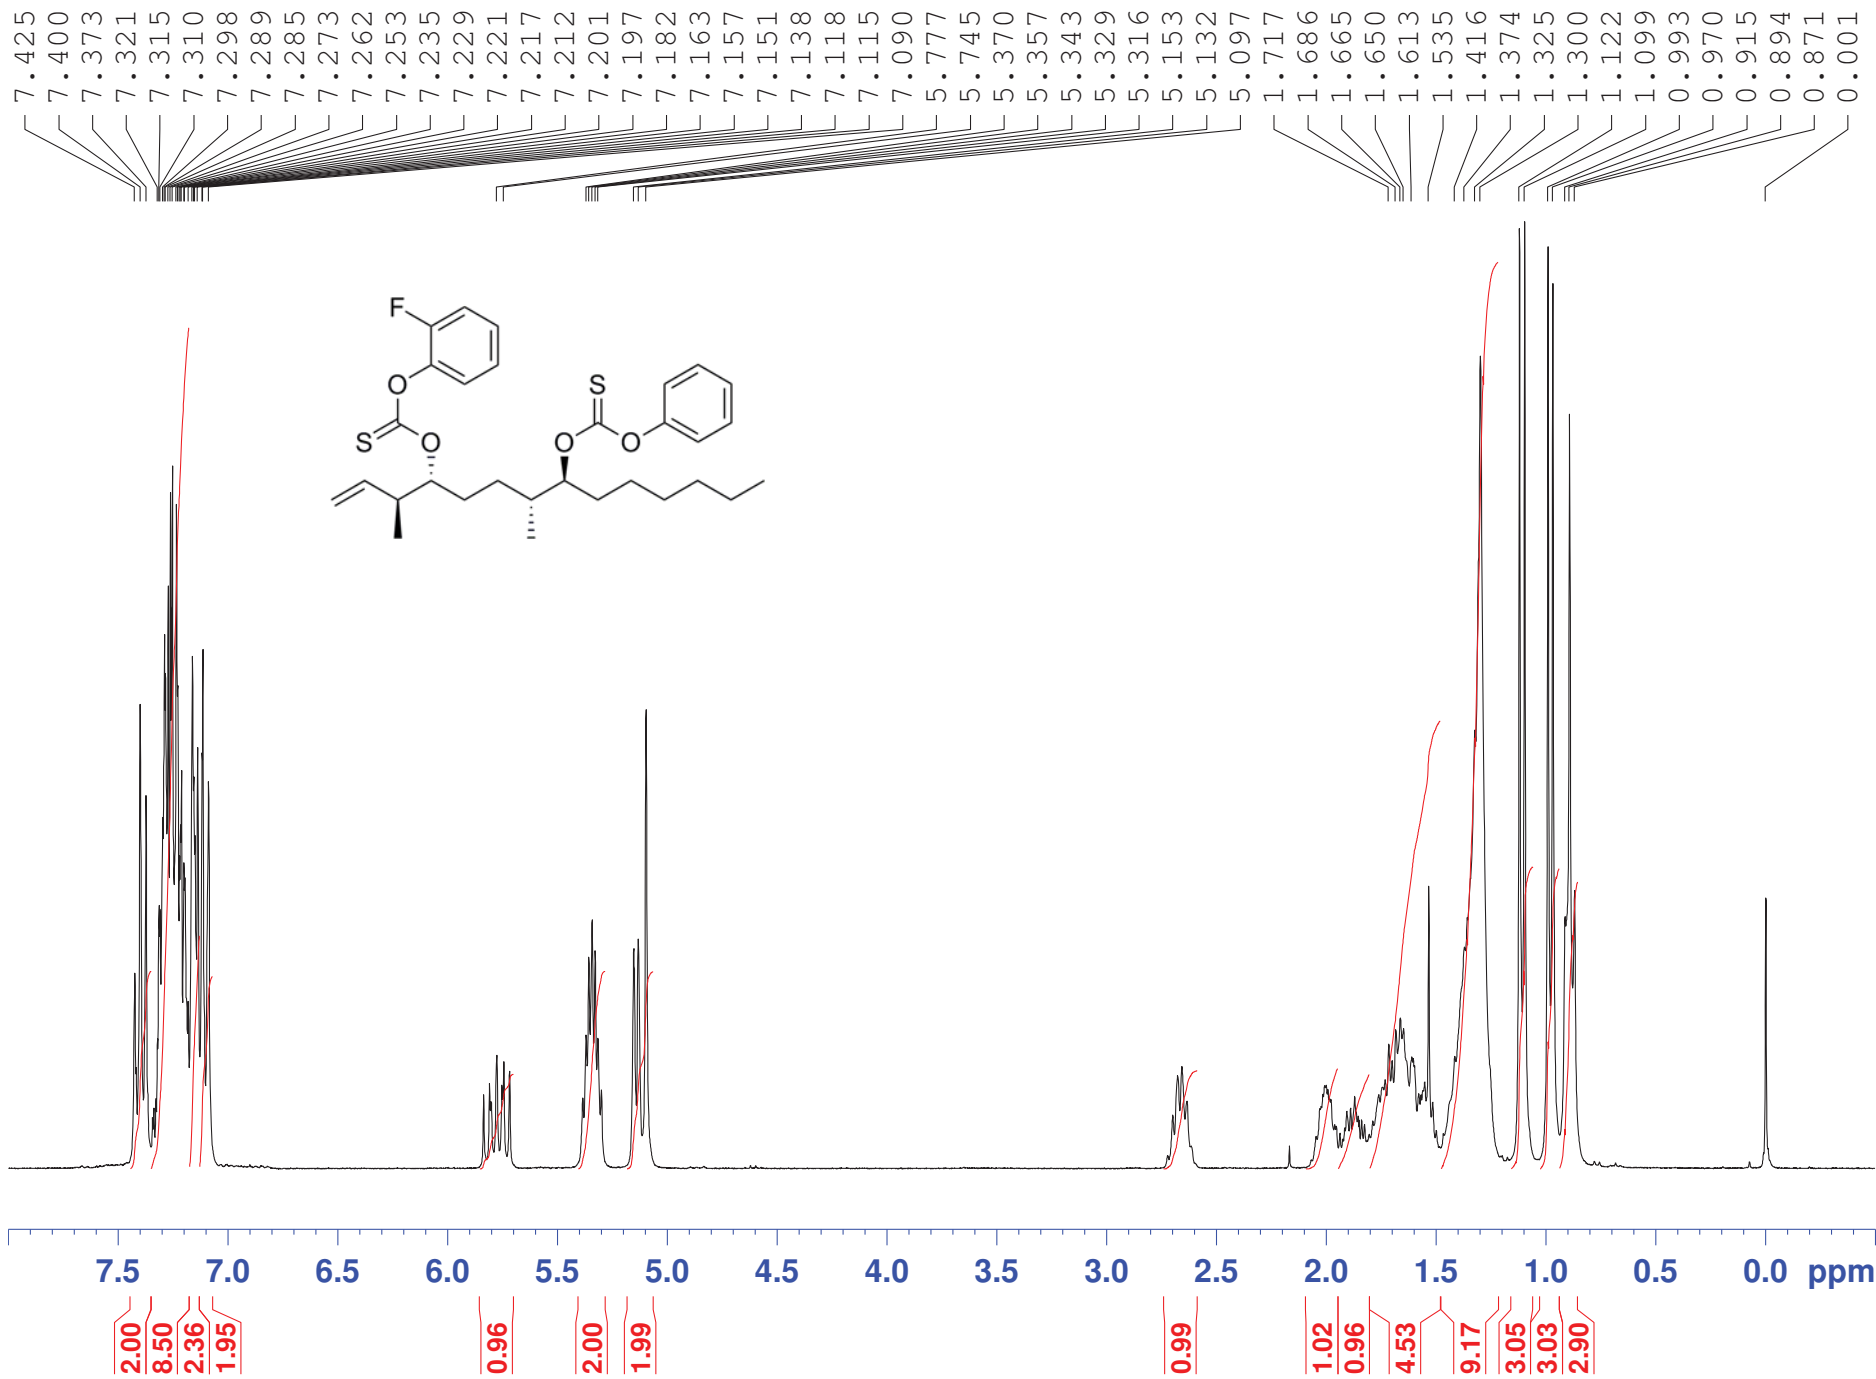

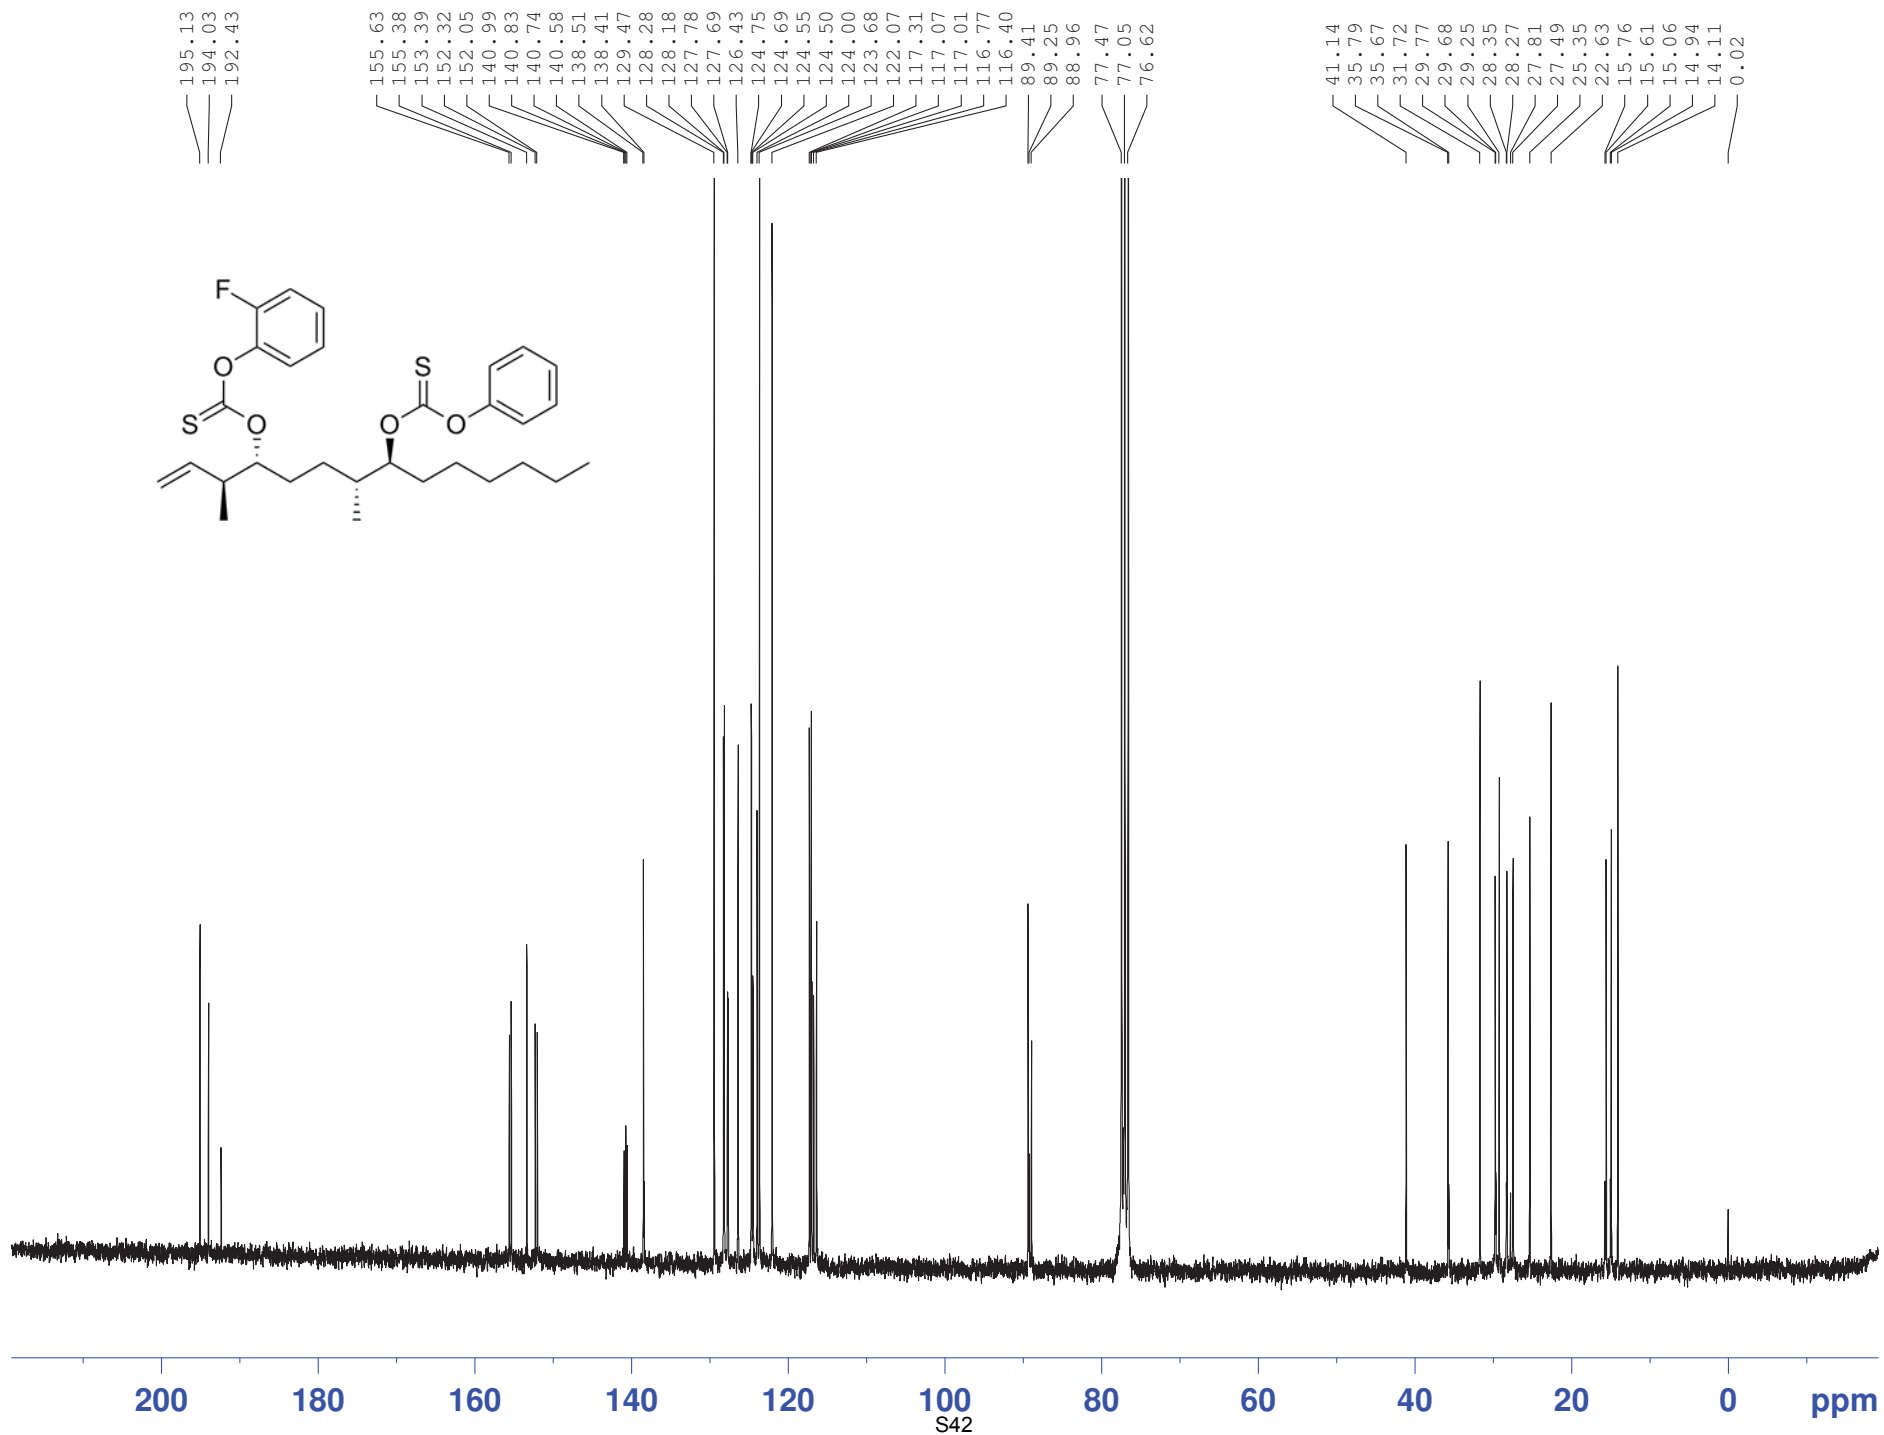

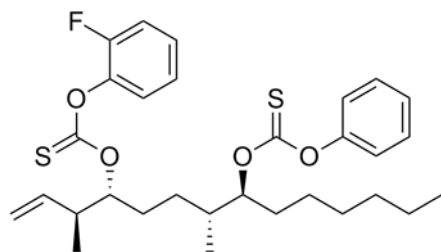

-128.09  
-128.11  
-128.12  
-128.13  
-128.15  
-128.16  
-128.19  
-128.20

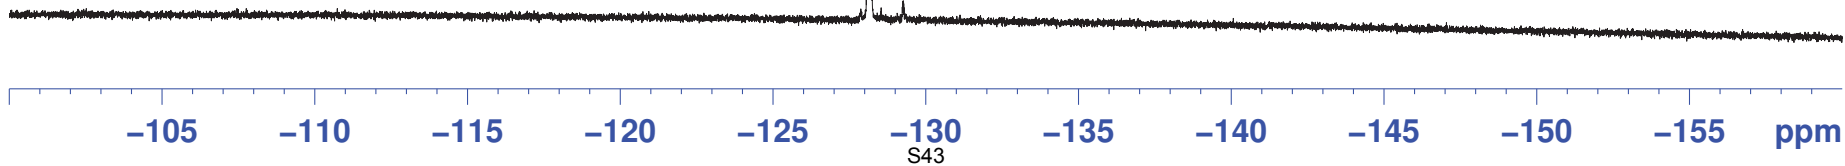

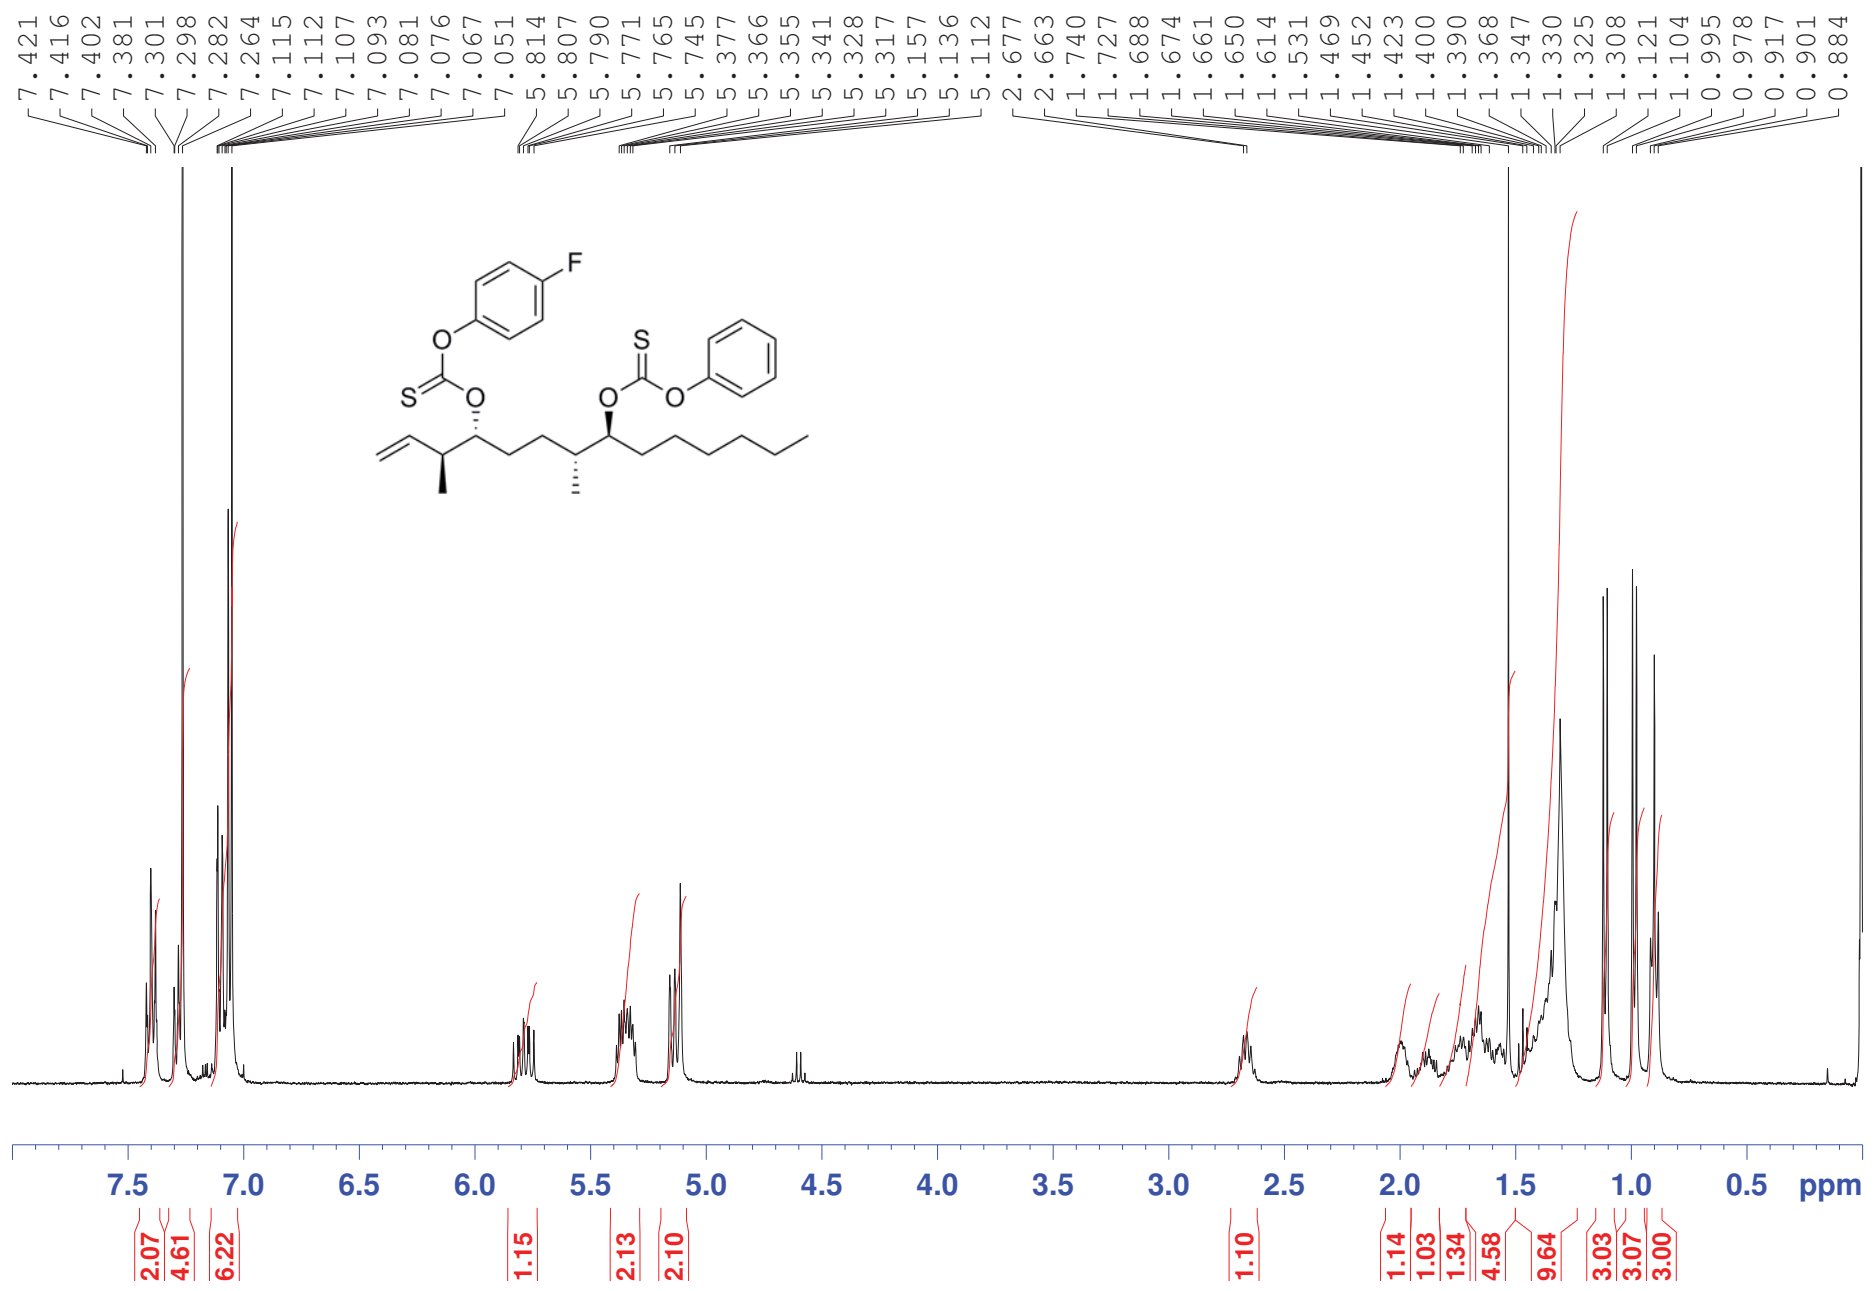

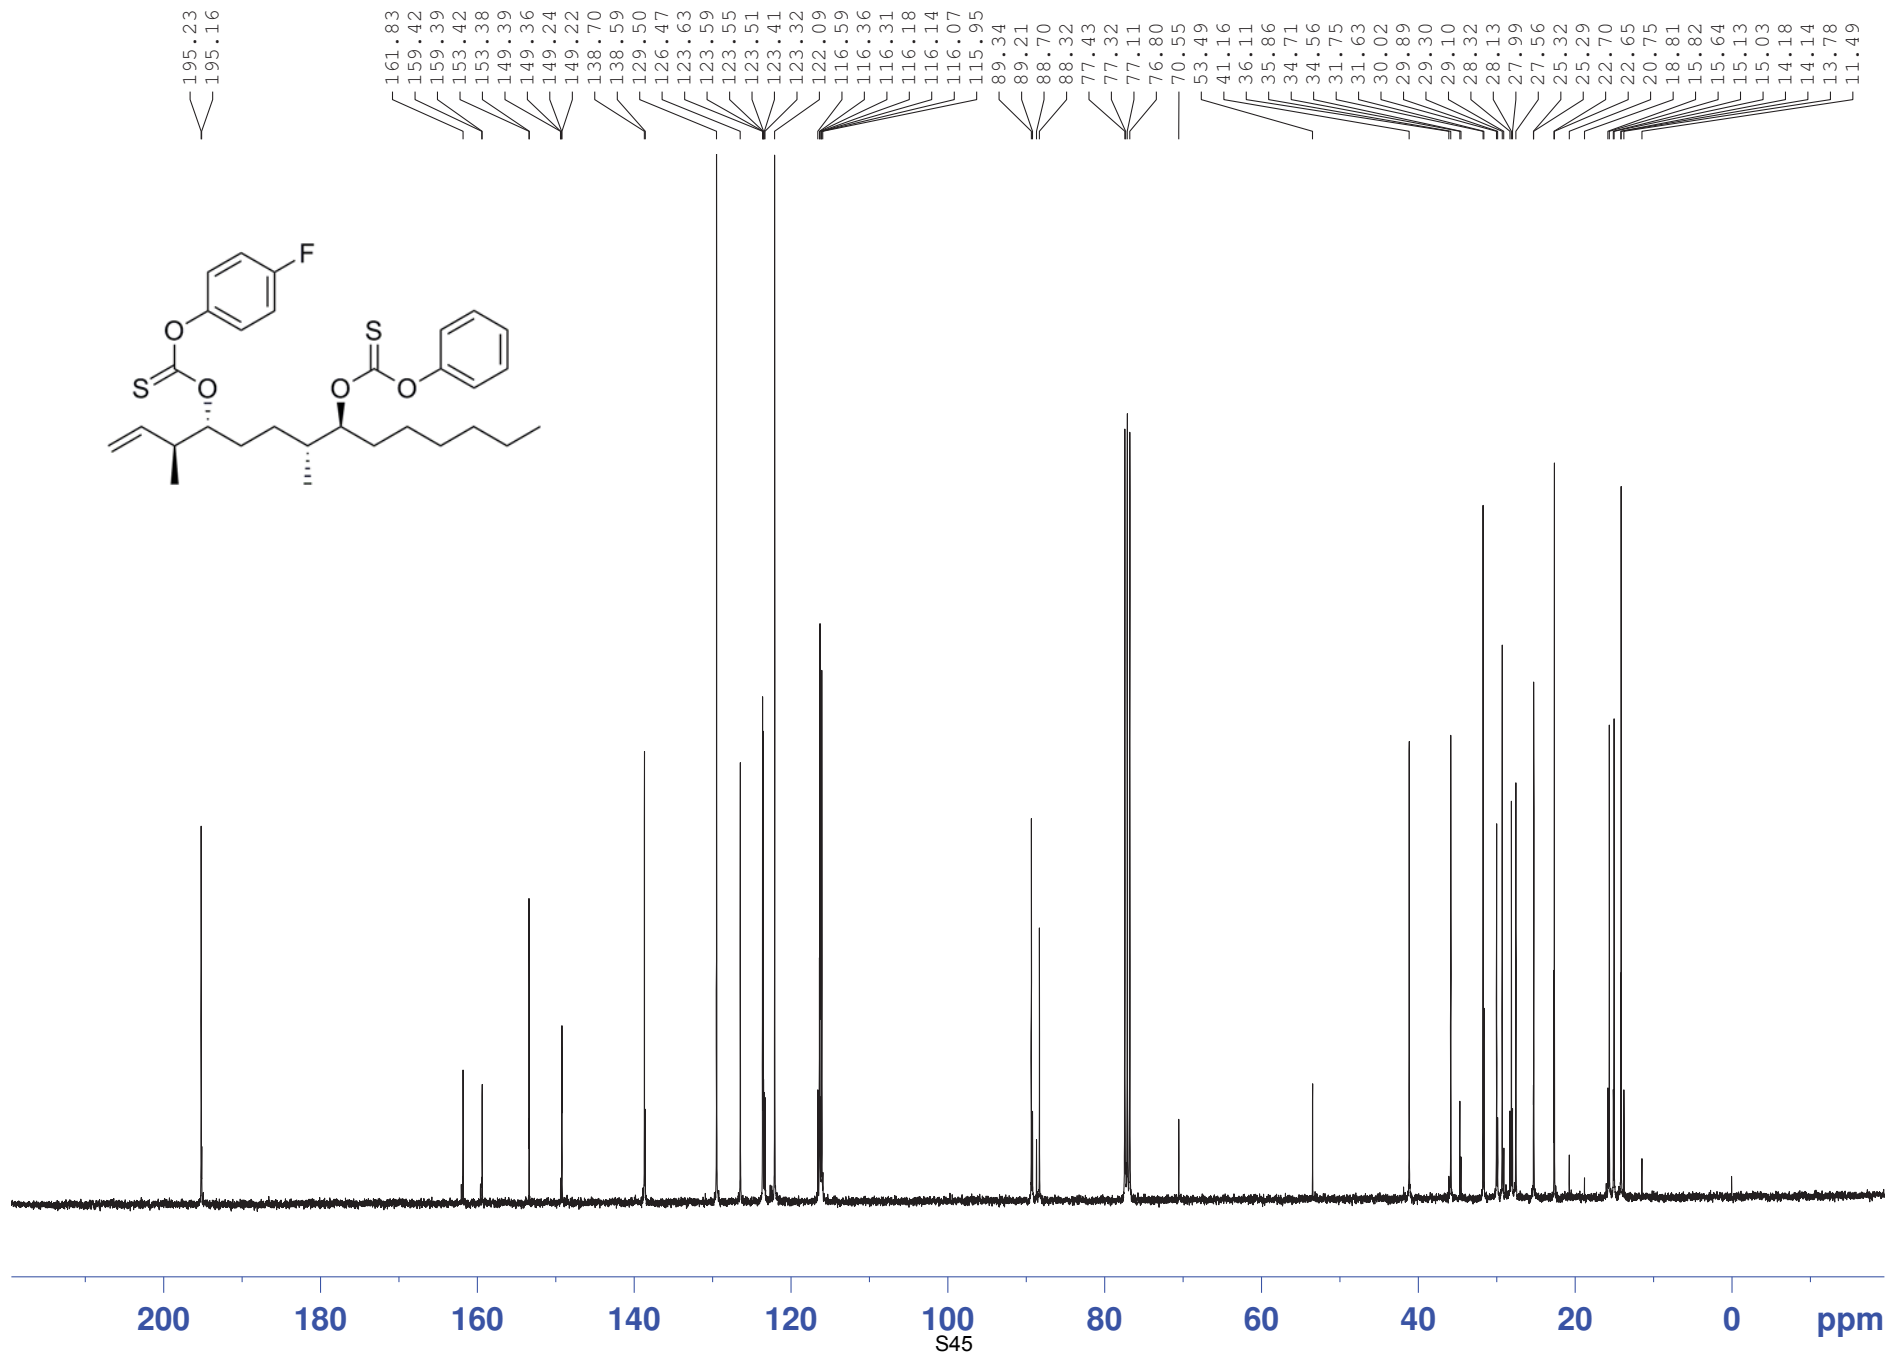



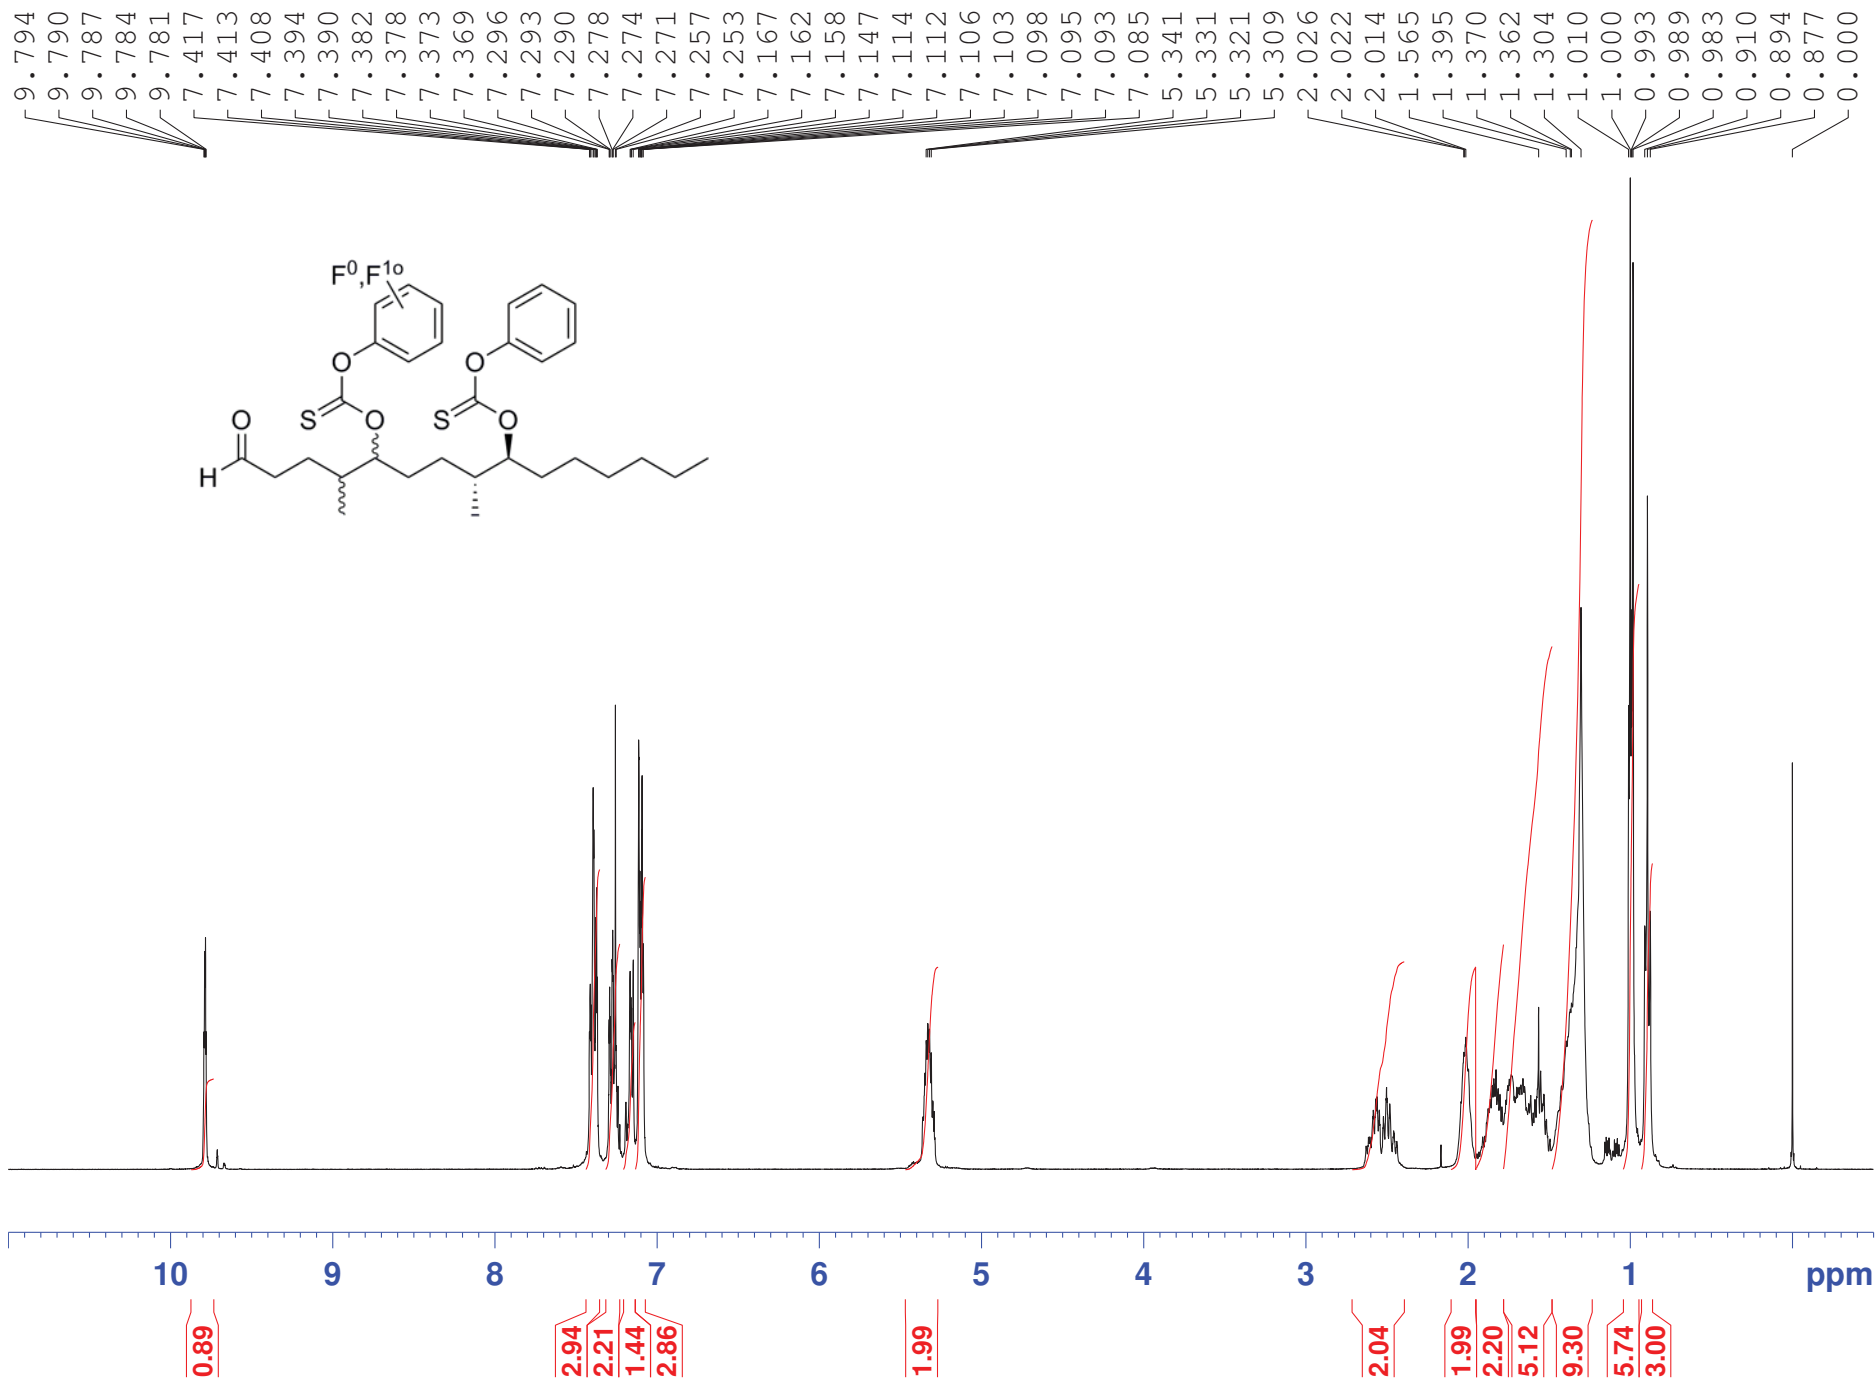

Yeh and coworkers

Trimethylnonadecanol stereoisomer library

201.90  
201.87  
195.19  
195.13  
195.06  
193.95

155.14  
153.36  
153.33  
153.29  
153.27  
152.66  
129.50  
129.46  
127.82  
127.74  
126.52  
126.44  
126.42  
124.58  
124.54  
123.93  
122.04  
121.98  
116.97  
116.79

89.79  
89.50  
89.35  
89.11  
88.93  
88.54  
41.52  
41.49  
35.84  
35.81  
35.78  
35.67  
35.48  
35.44  
35.38  
35.34  
35.29  
31.70  
30.00  
29.81  
29.65  
29.25  
29.23  
28.06  
27.87  
27.49  
27.41  
27.25  
27.19  
25.32  
25.26  
24.29  
24.24  
24.12  
24.09  
22.60  
15.10  
15.05  
15.00  
14.95

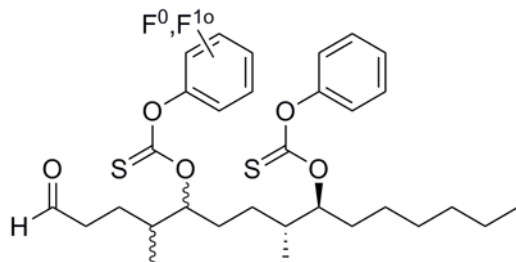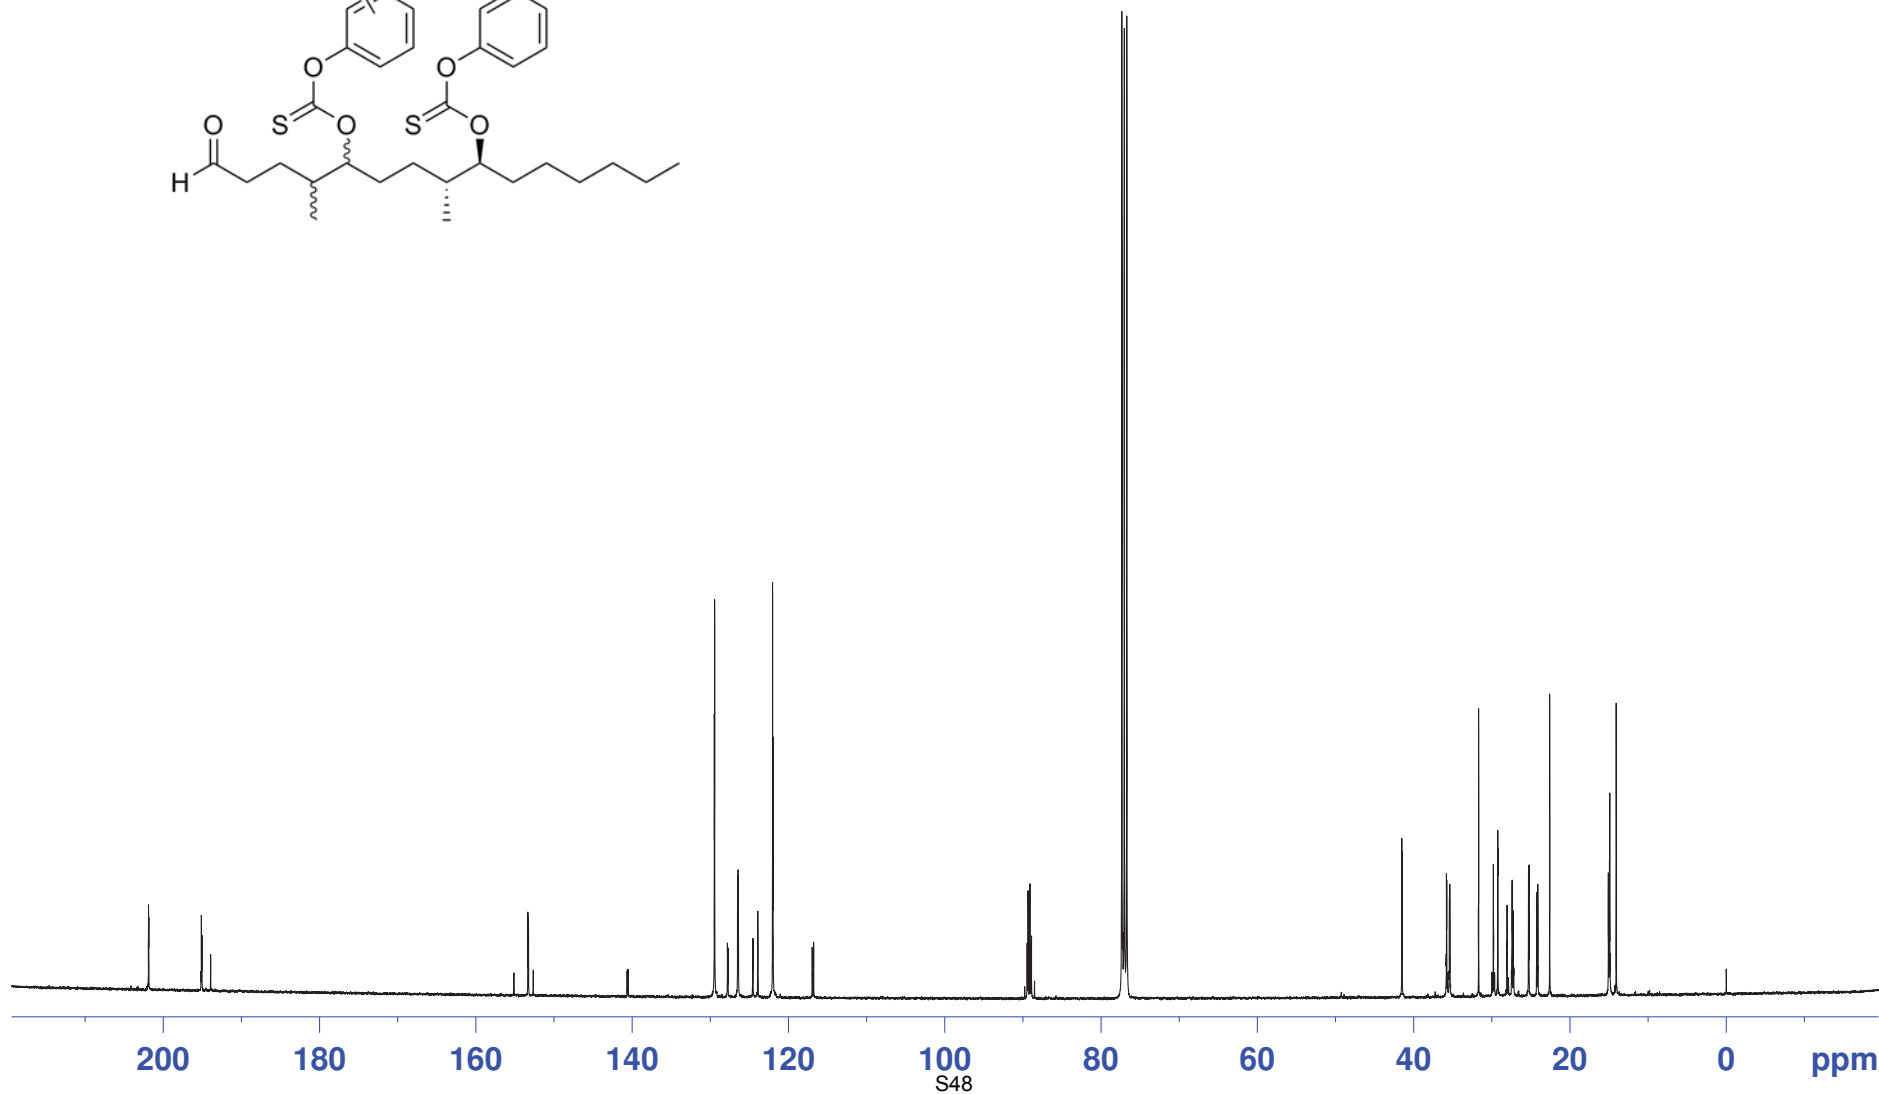



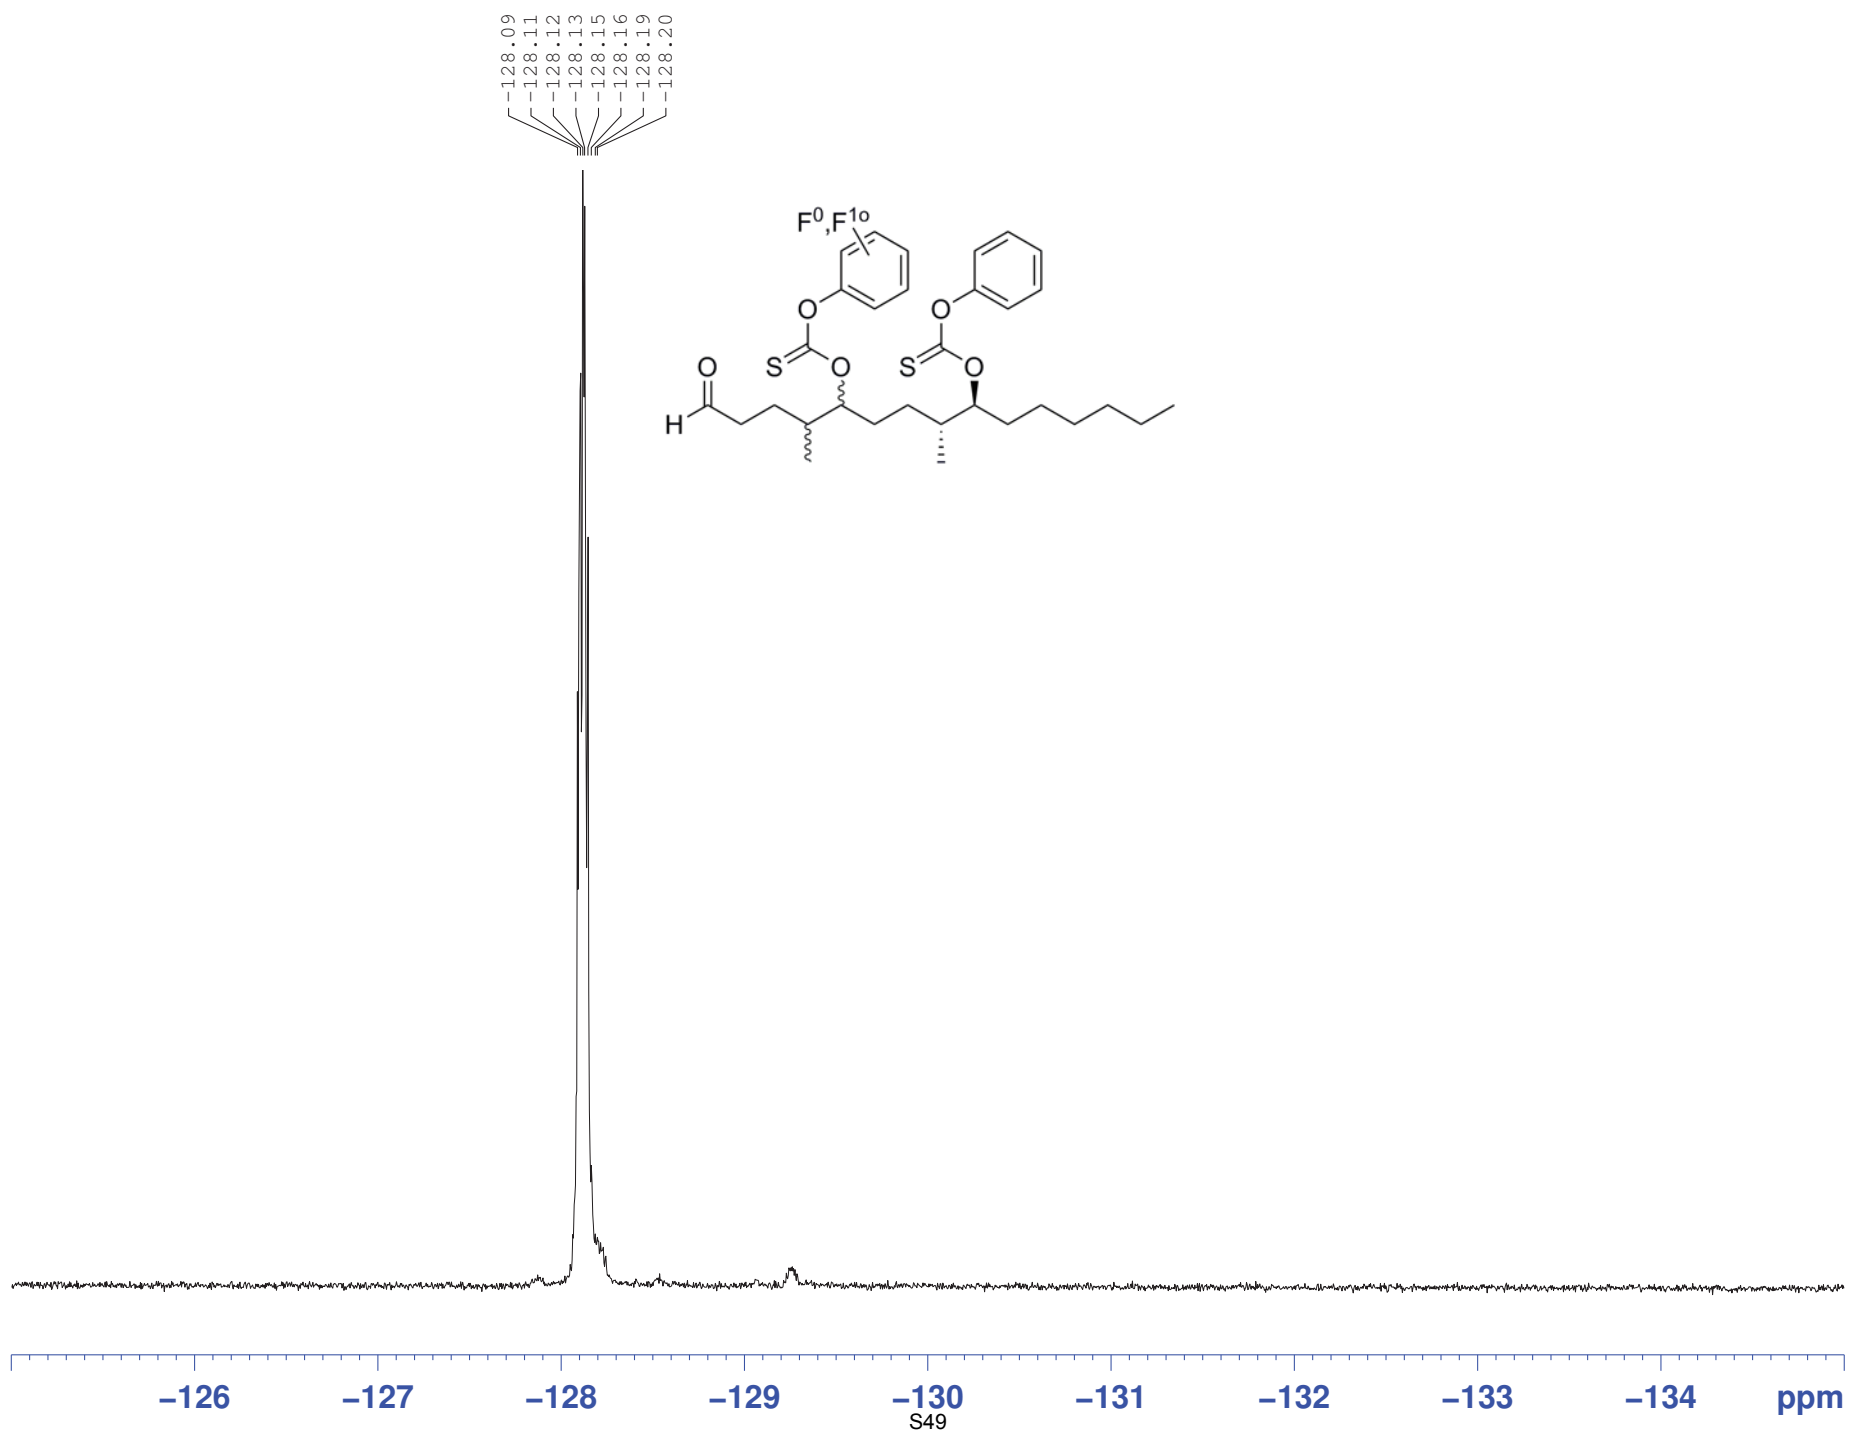

9.802  
9.799  
9.795  
9.788  
7.425  
7.406  
7.387  
7.305  
7.287  
7.272  
7.137  
7.116  
7.087  
7.072  
5.364  
5.353  
5.344  
5.332  
2.587  
2.567  
2.511  
2.037  
1.883  
1.875  
1.863  
1.847  
1.840  
1.835  
1.827  
1.812  
1.798  
1.785  
1.775  
1.763  
1.751  
1.728  
1.717  
1.707  
1.695  
1.660  
1.645  
1.603  
1.580  
1.566  
1.545  
1.457  
1.405  
1.334  
1.036  
1.030  
1.018  
1.000  
0.940  
0.925  
0.908

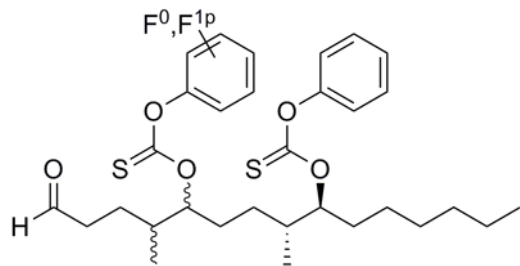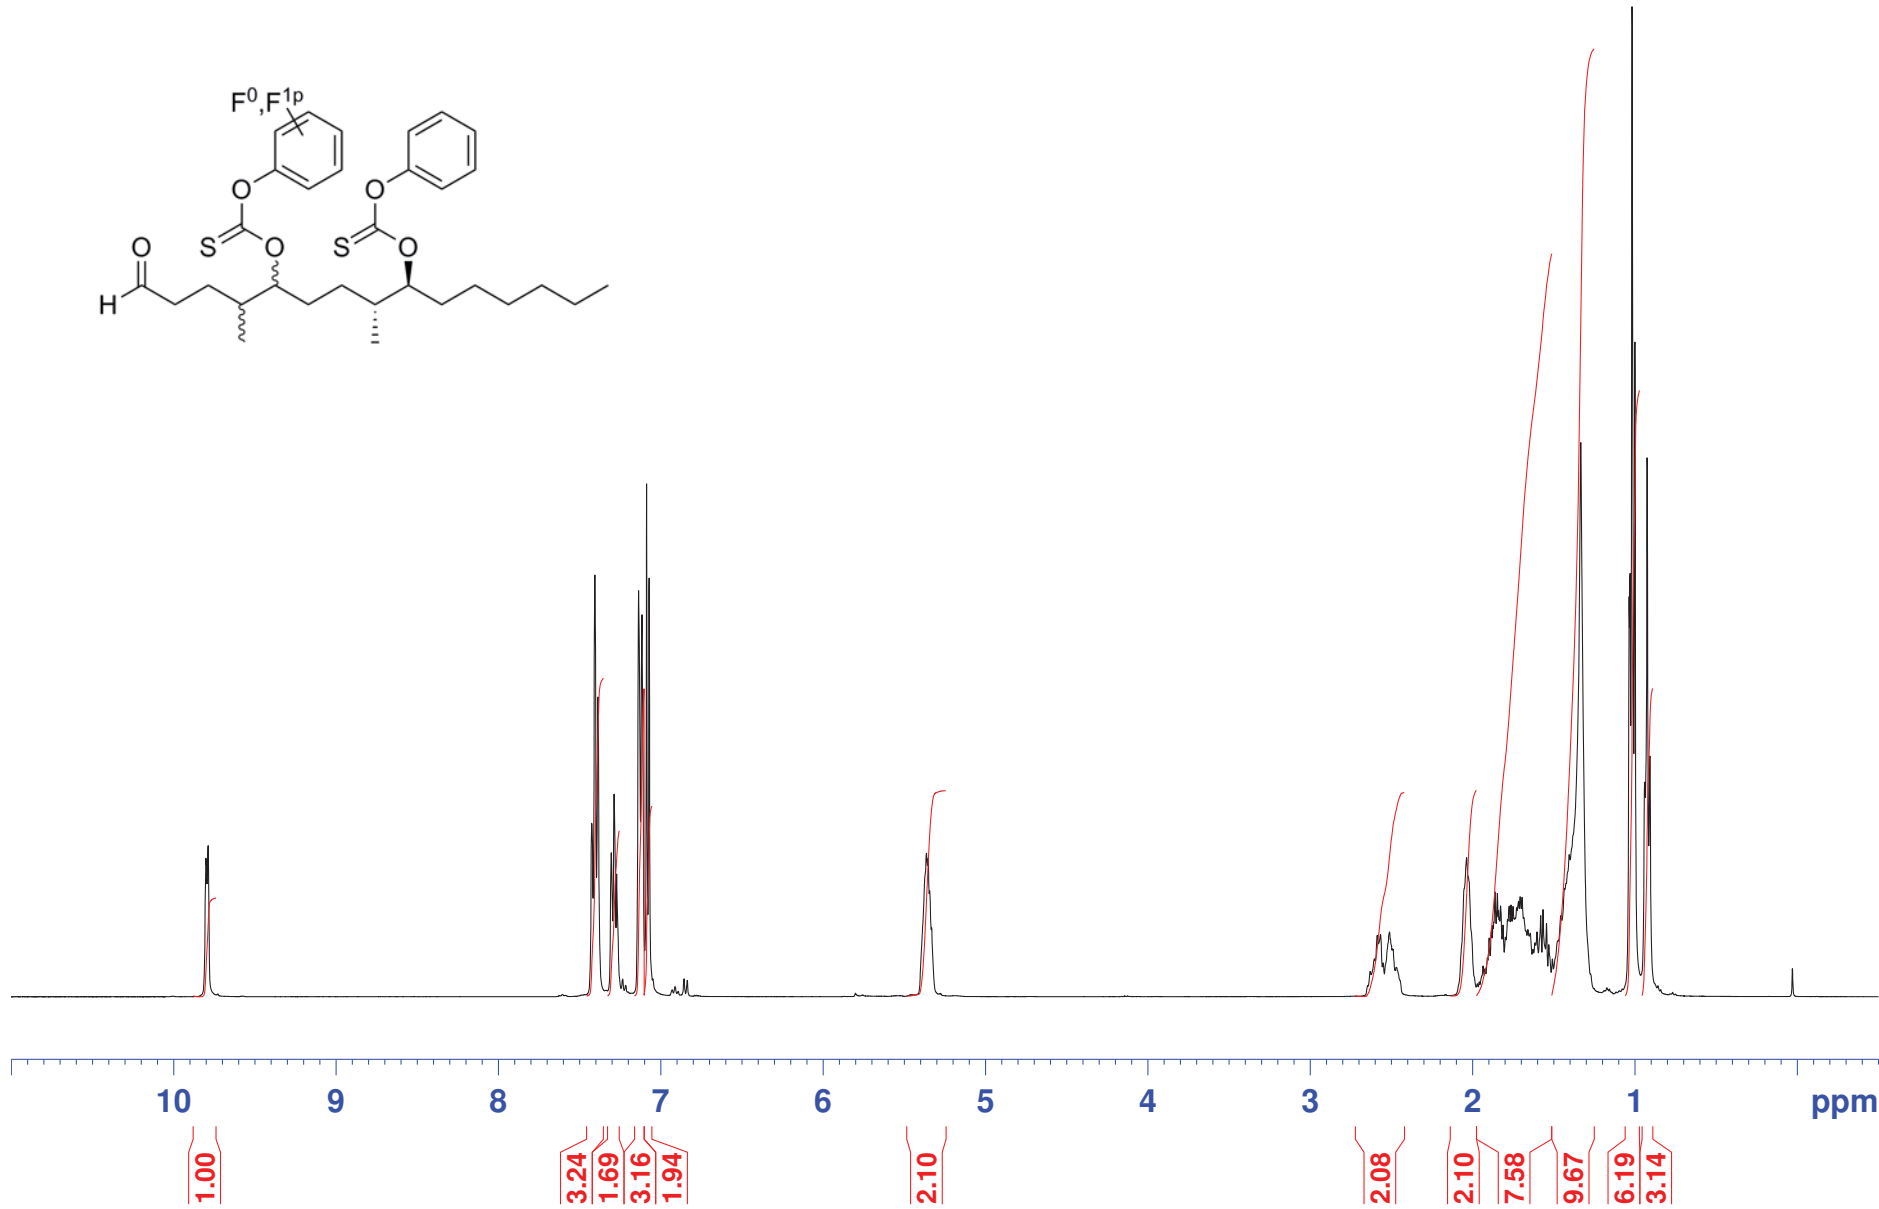

Yeh and coworkers

Trimethylnonadecanol stereoisomer library

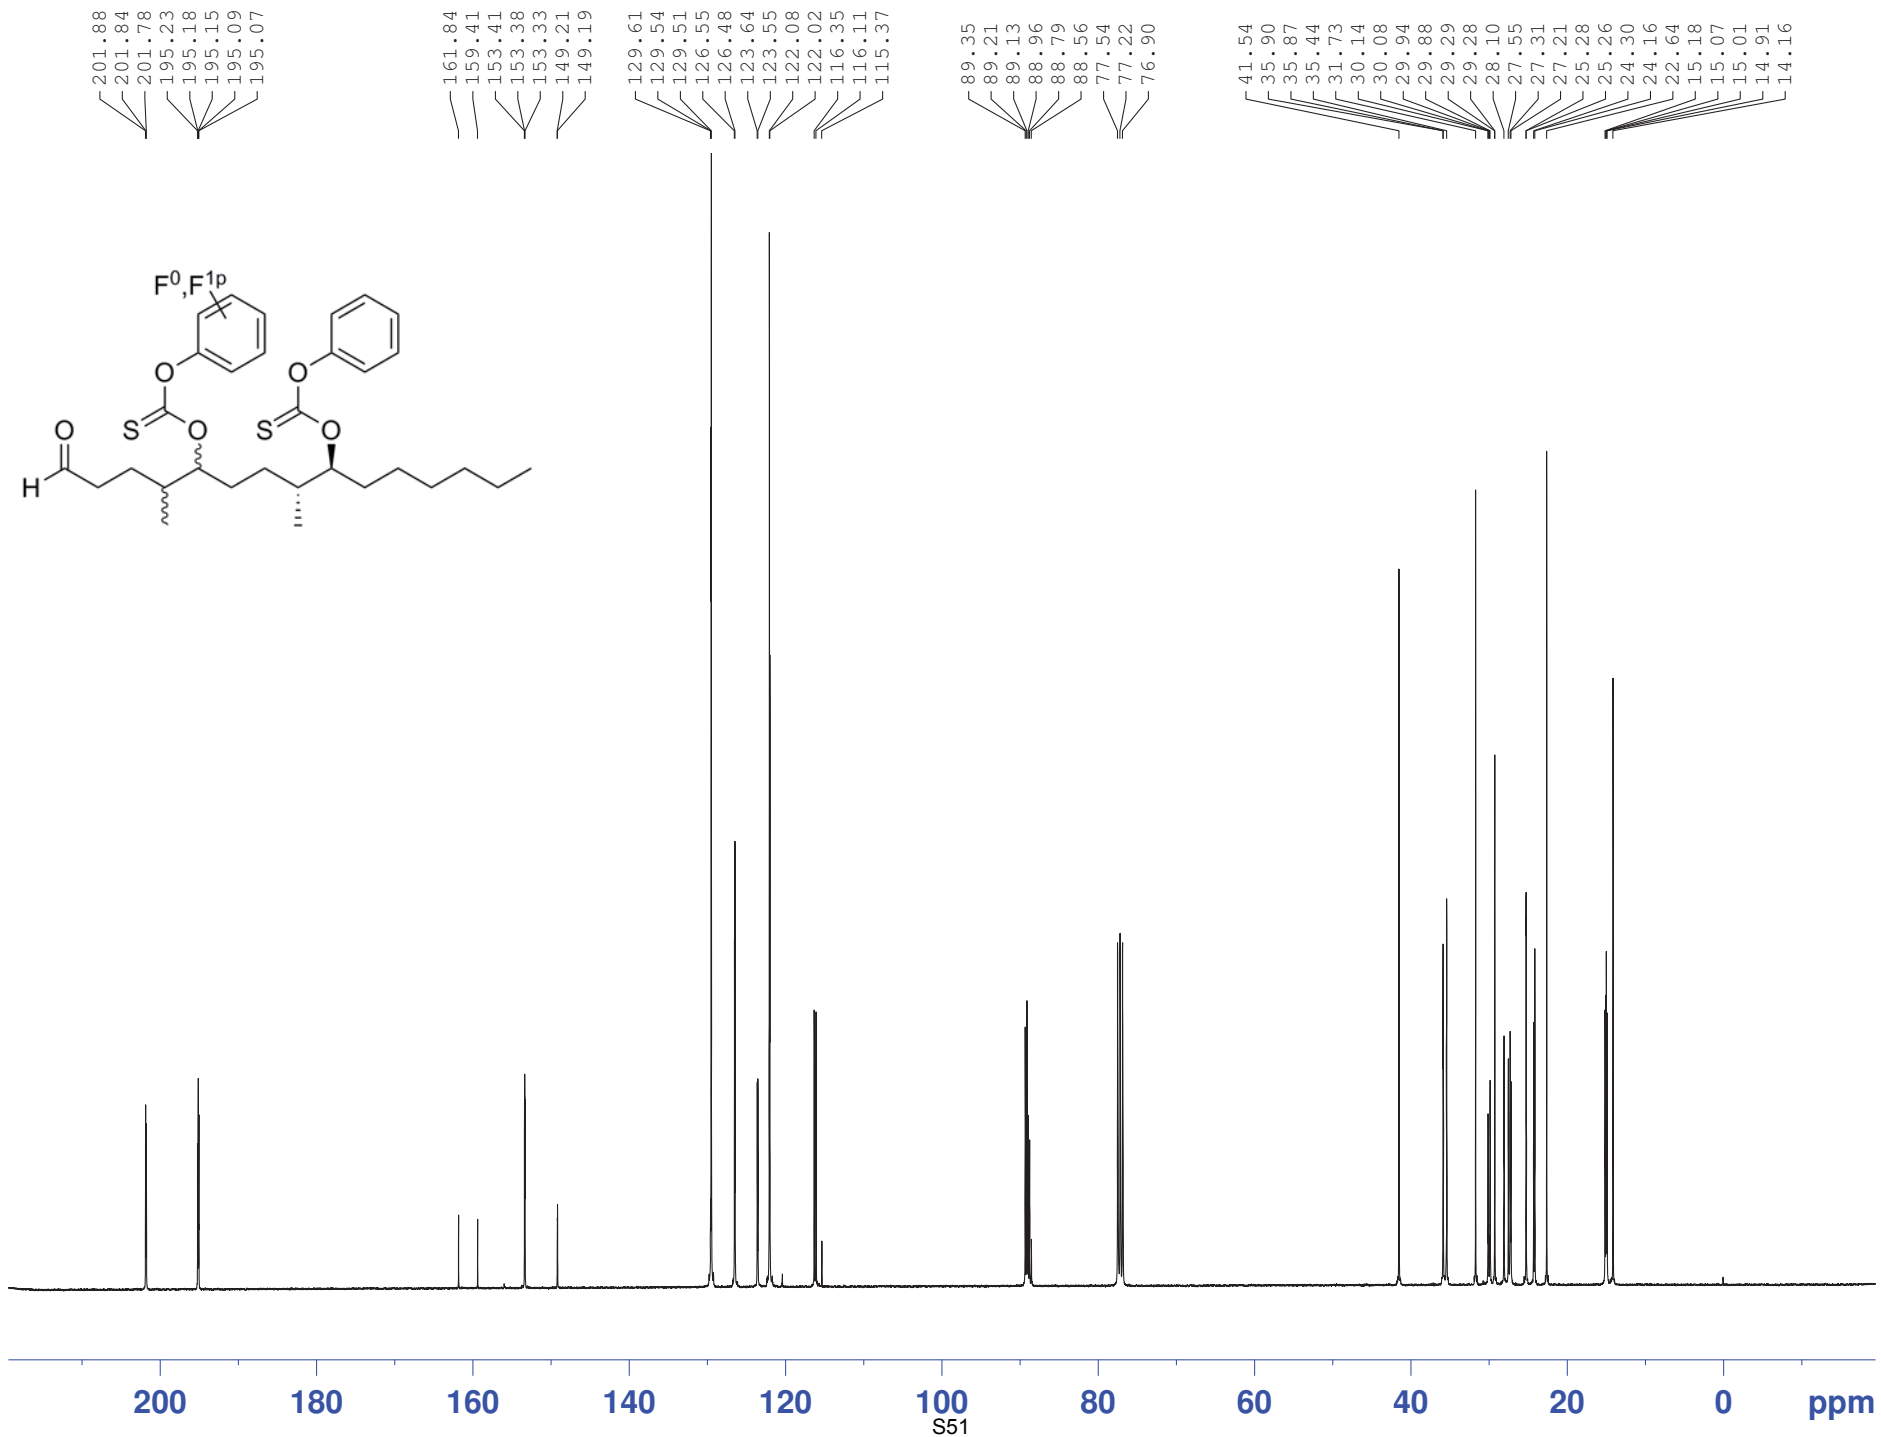

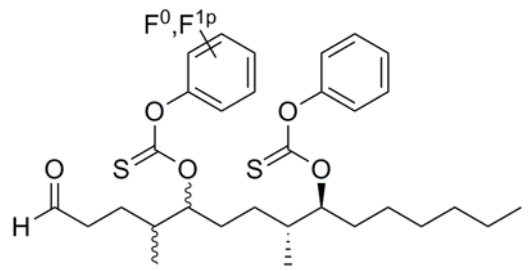

-115.91  
-115.93  
-115.94  
-115.96  
-115.98

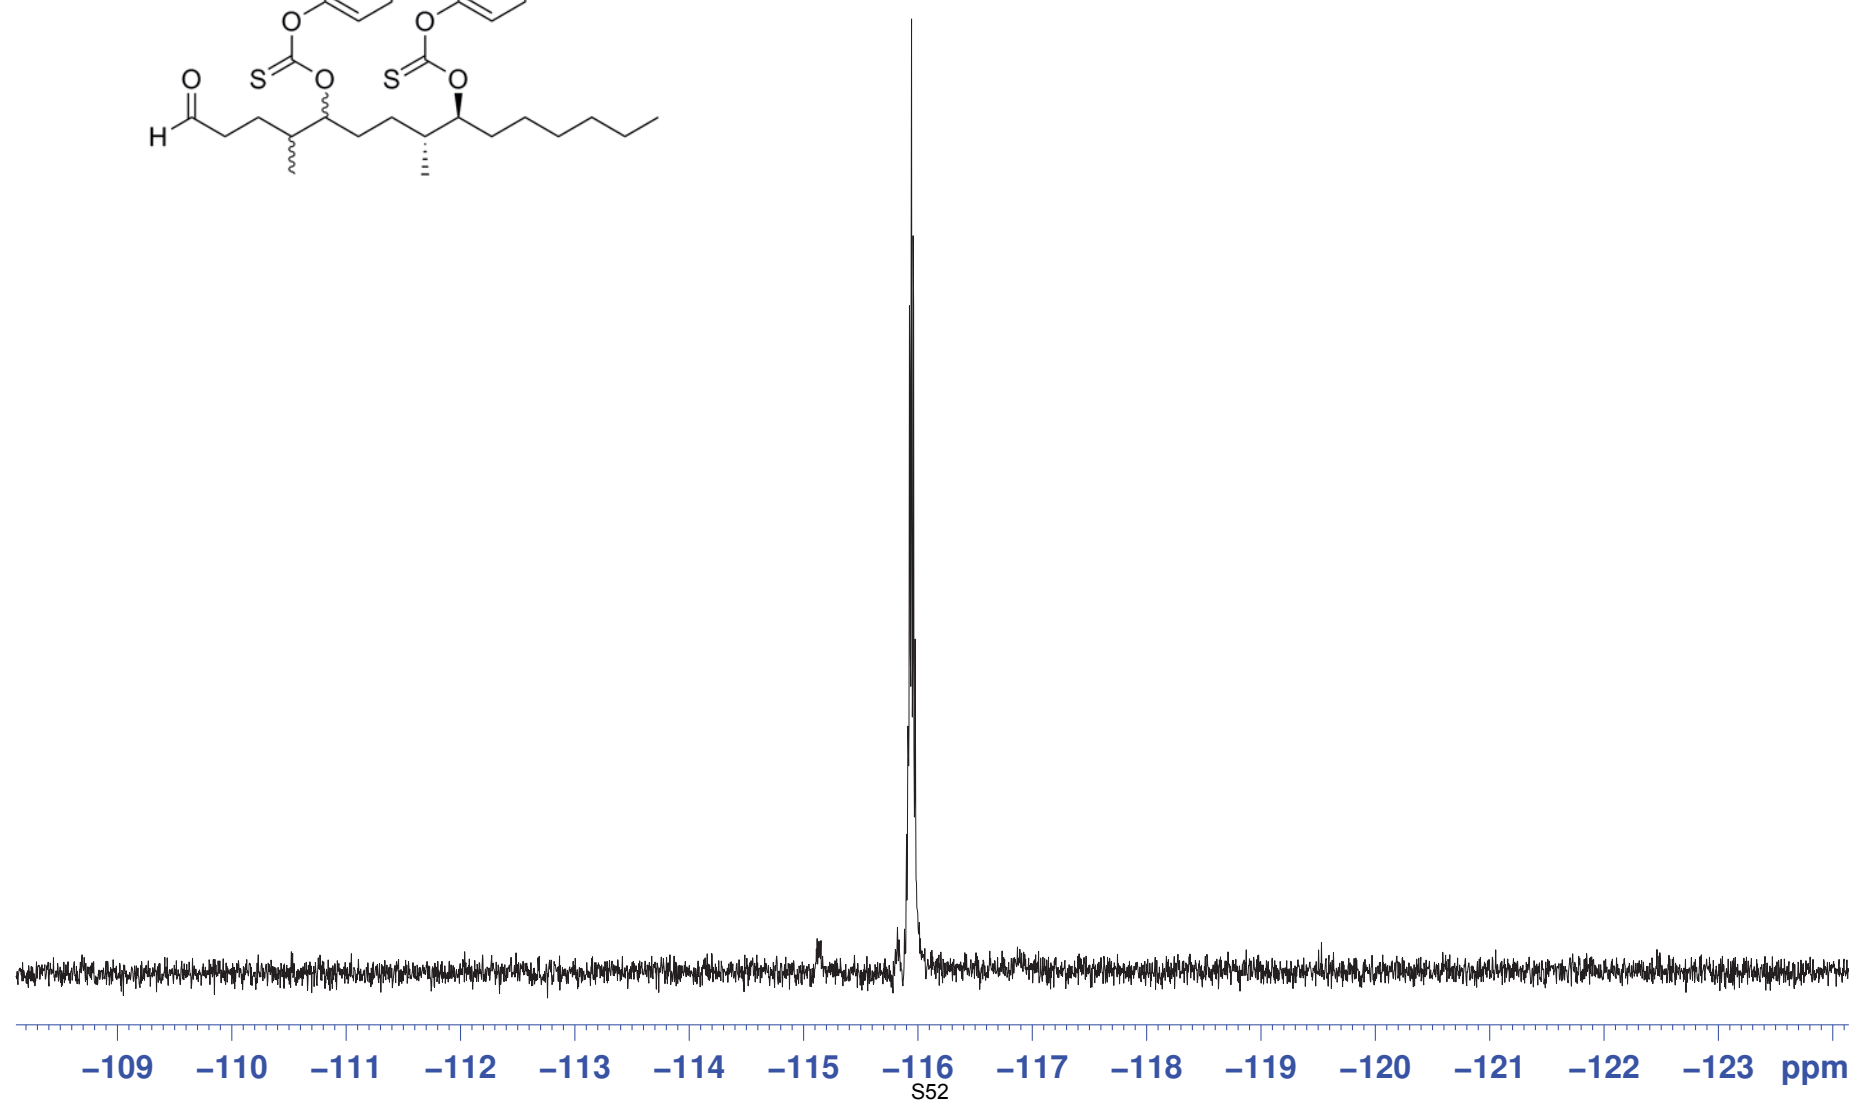

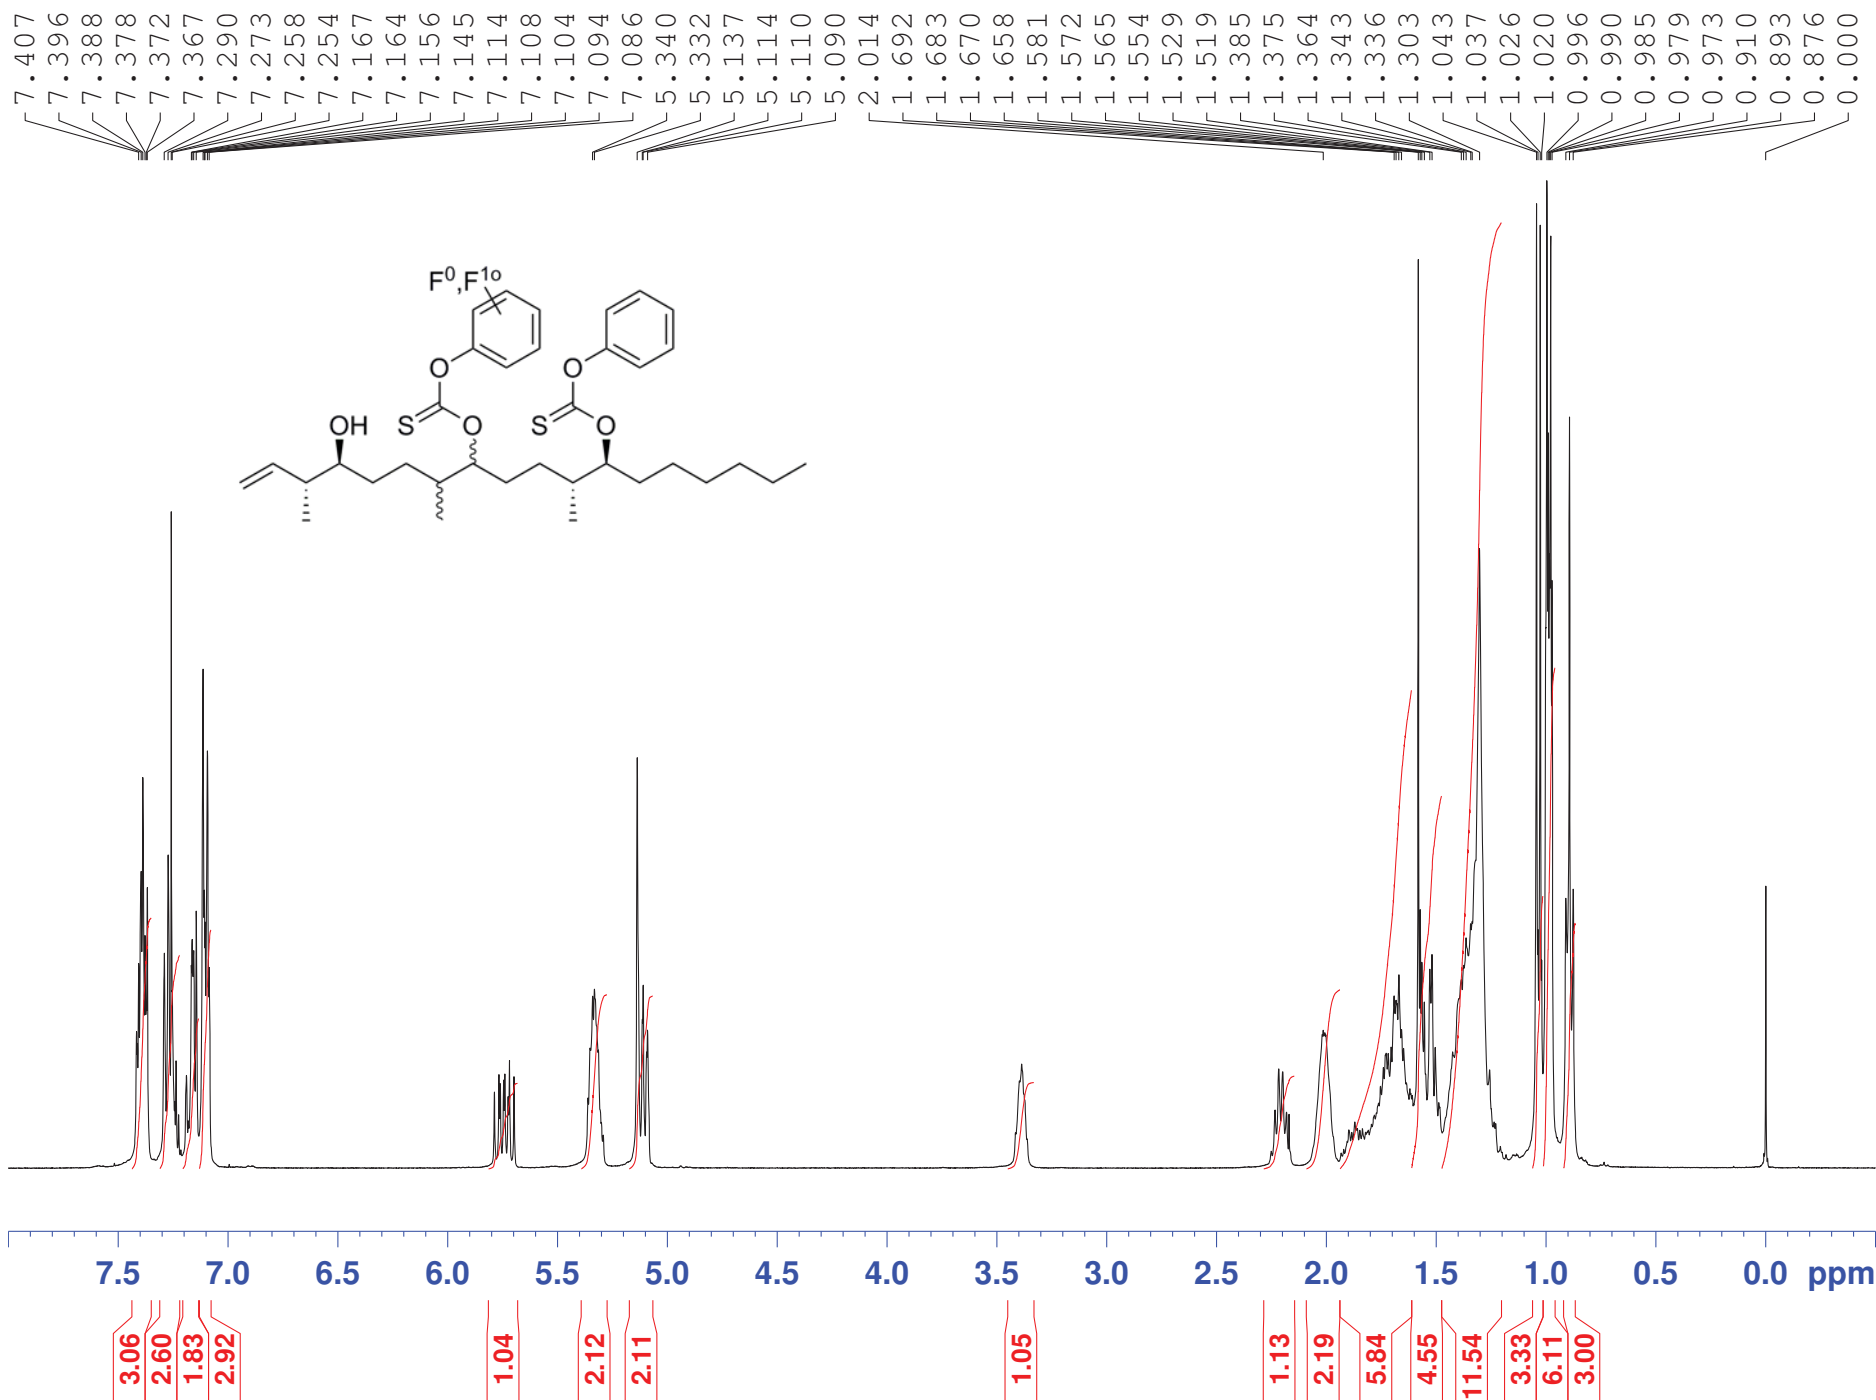

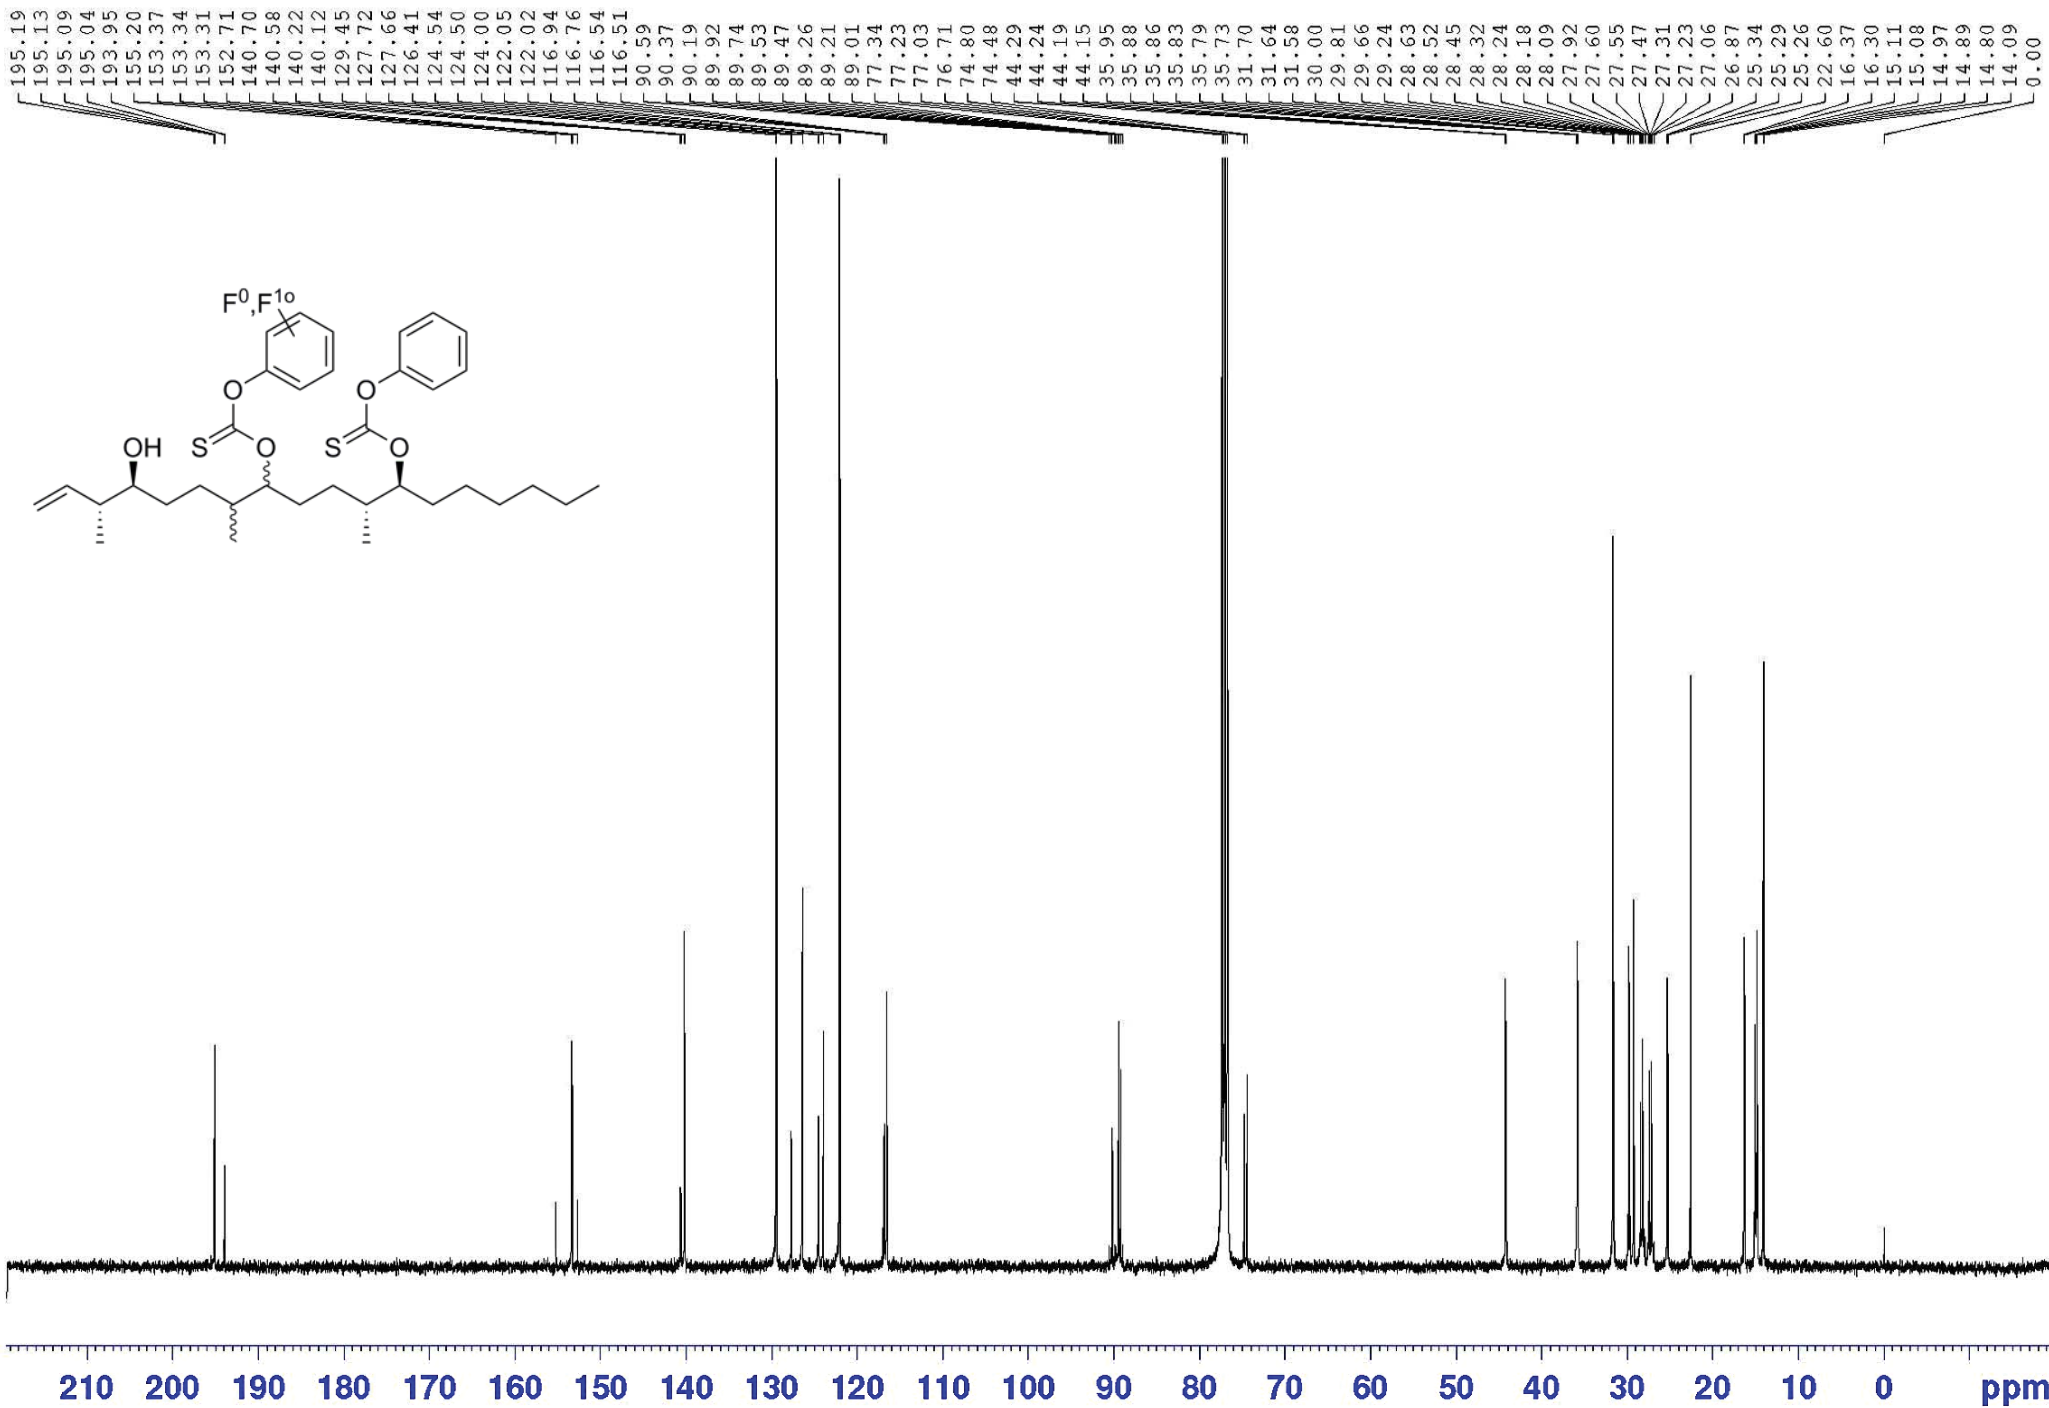

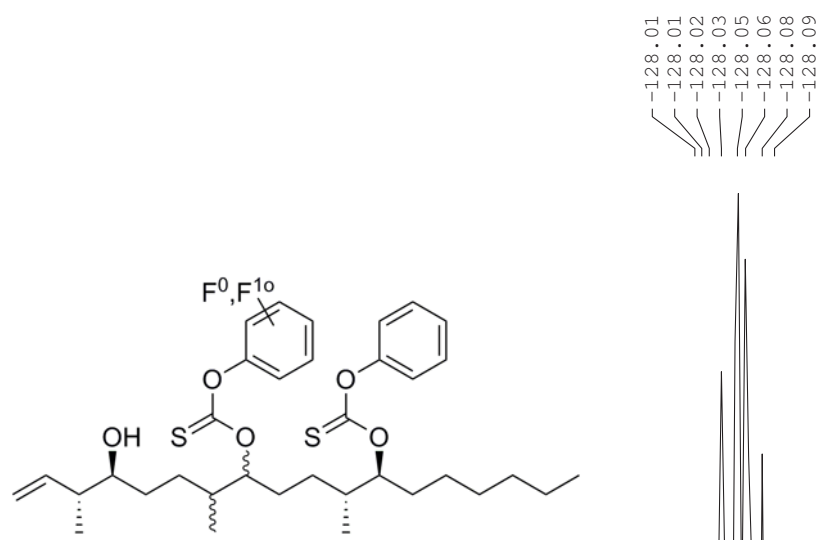

-128.01  
-128.01  
-128.02  
-128.03  
-128.05  
-128.06  
-128.08  
-128.09

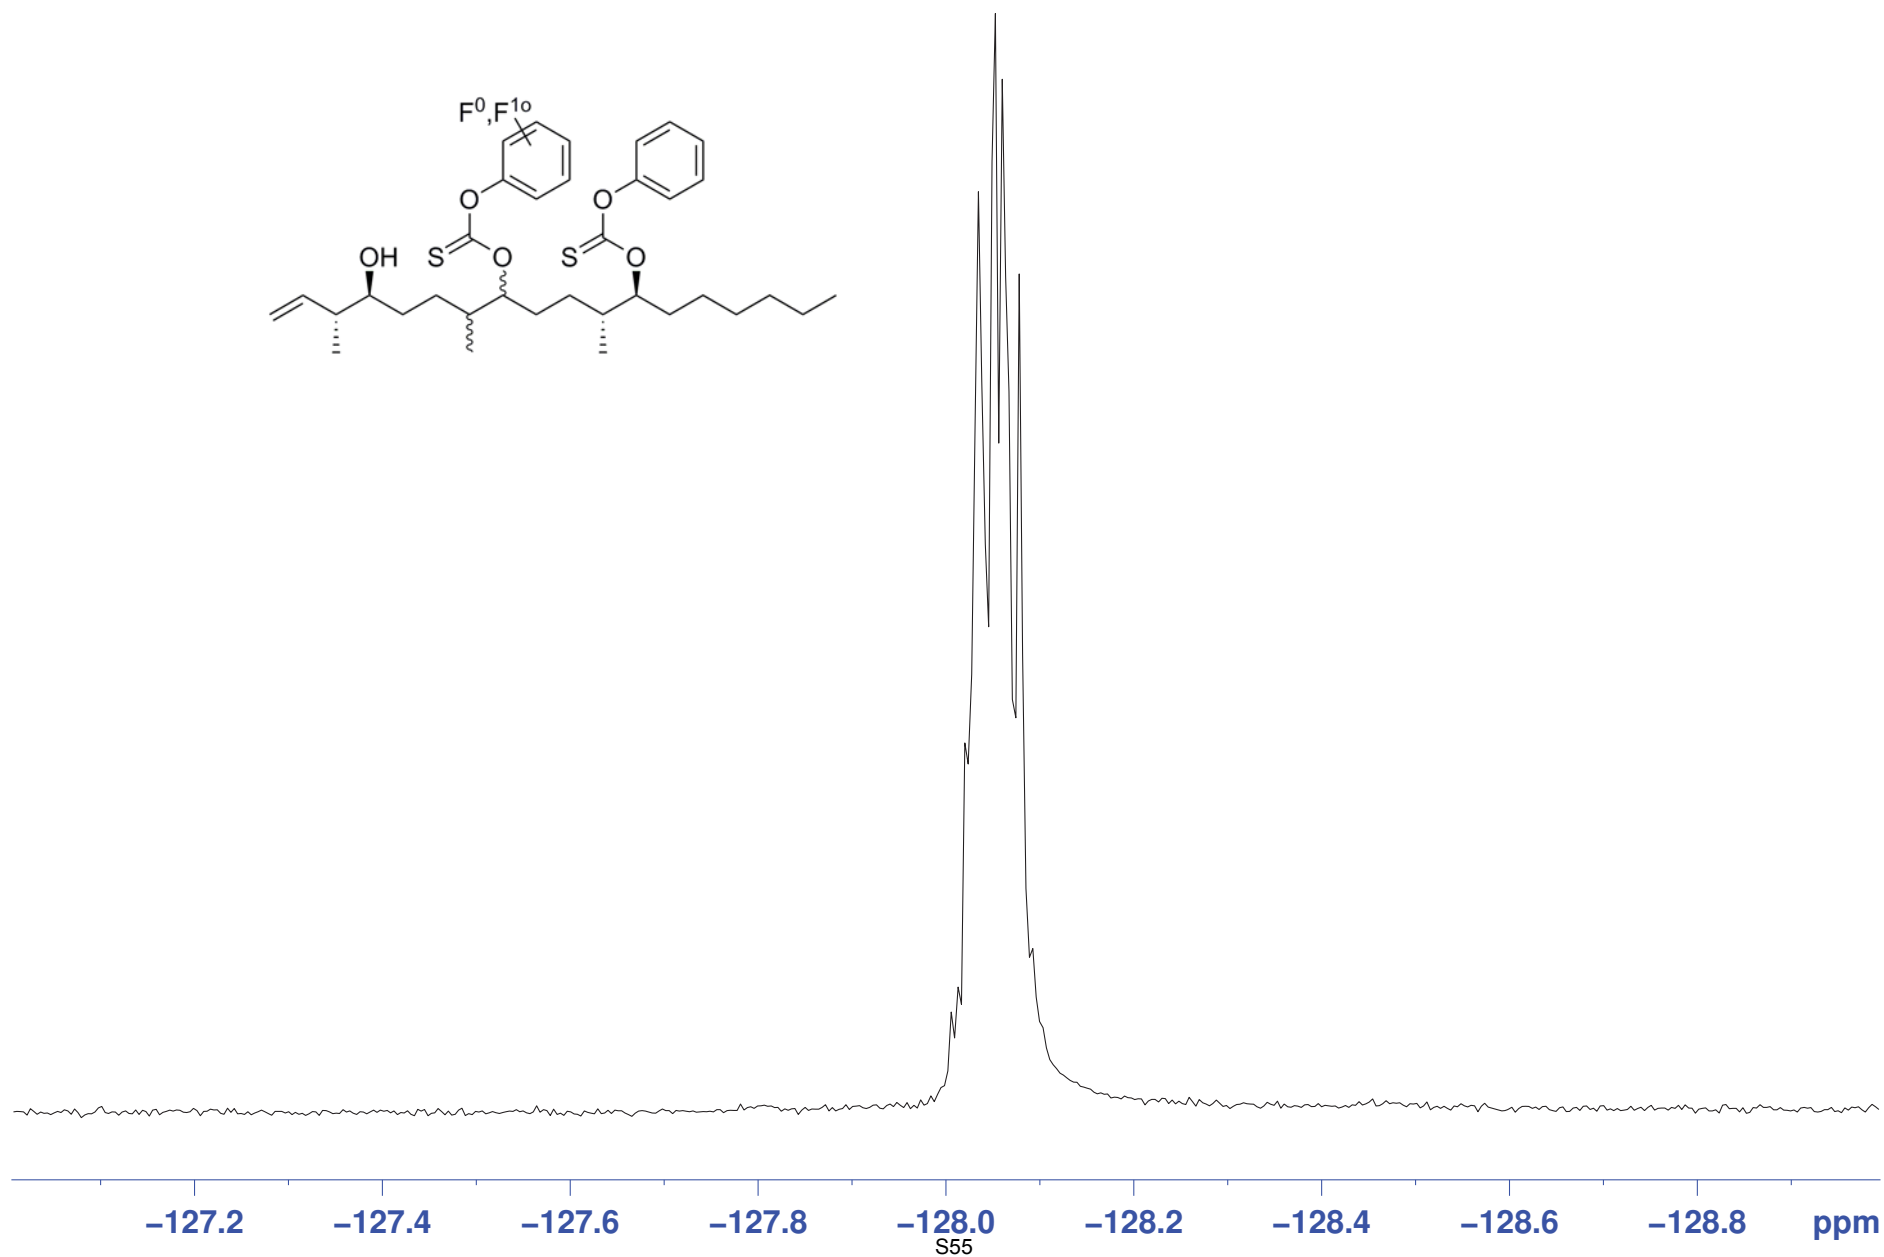

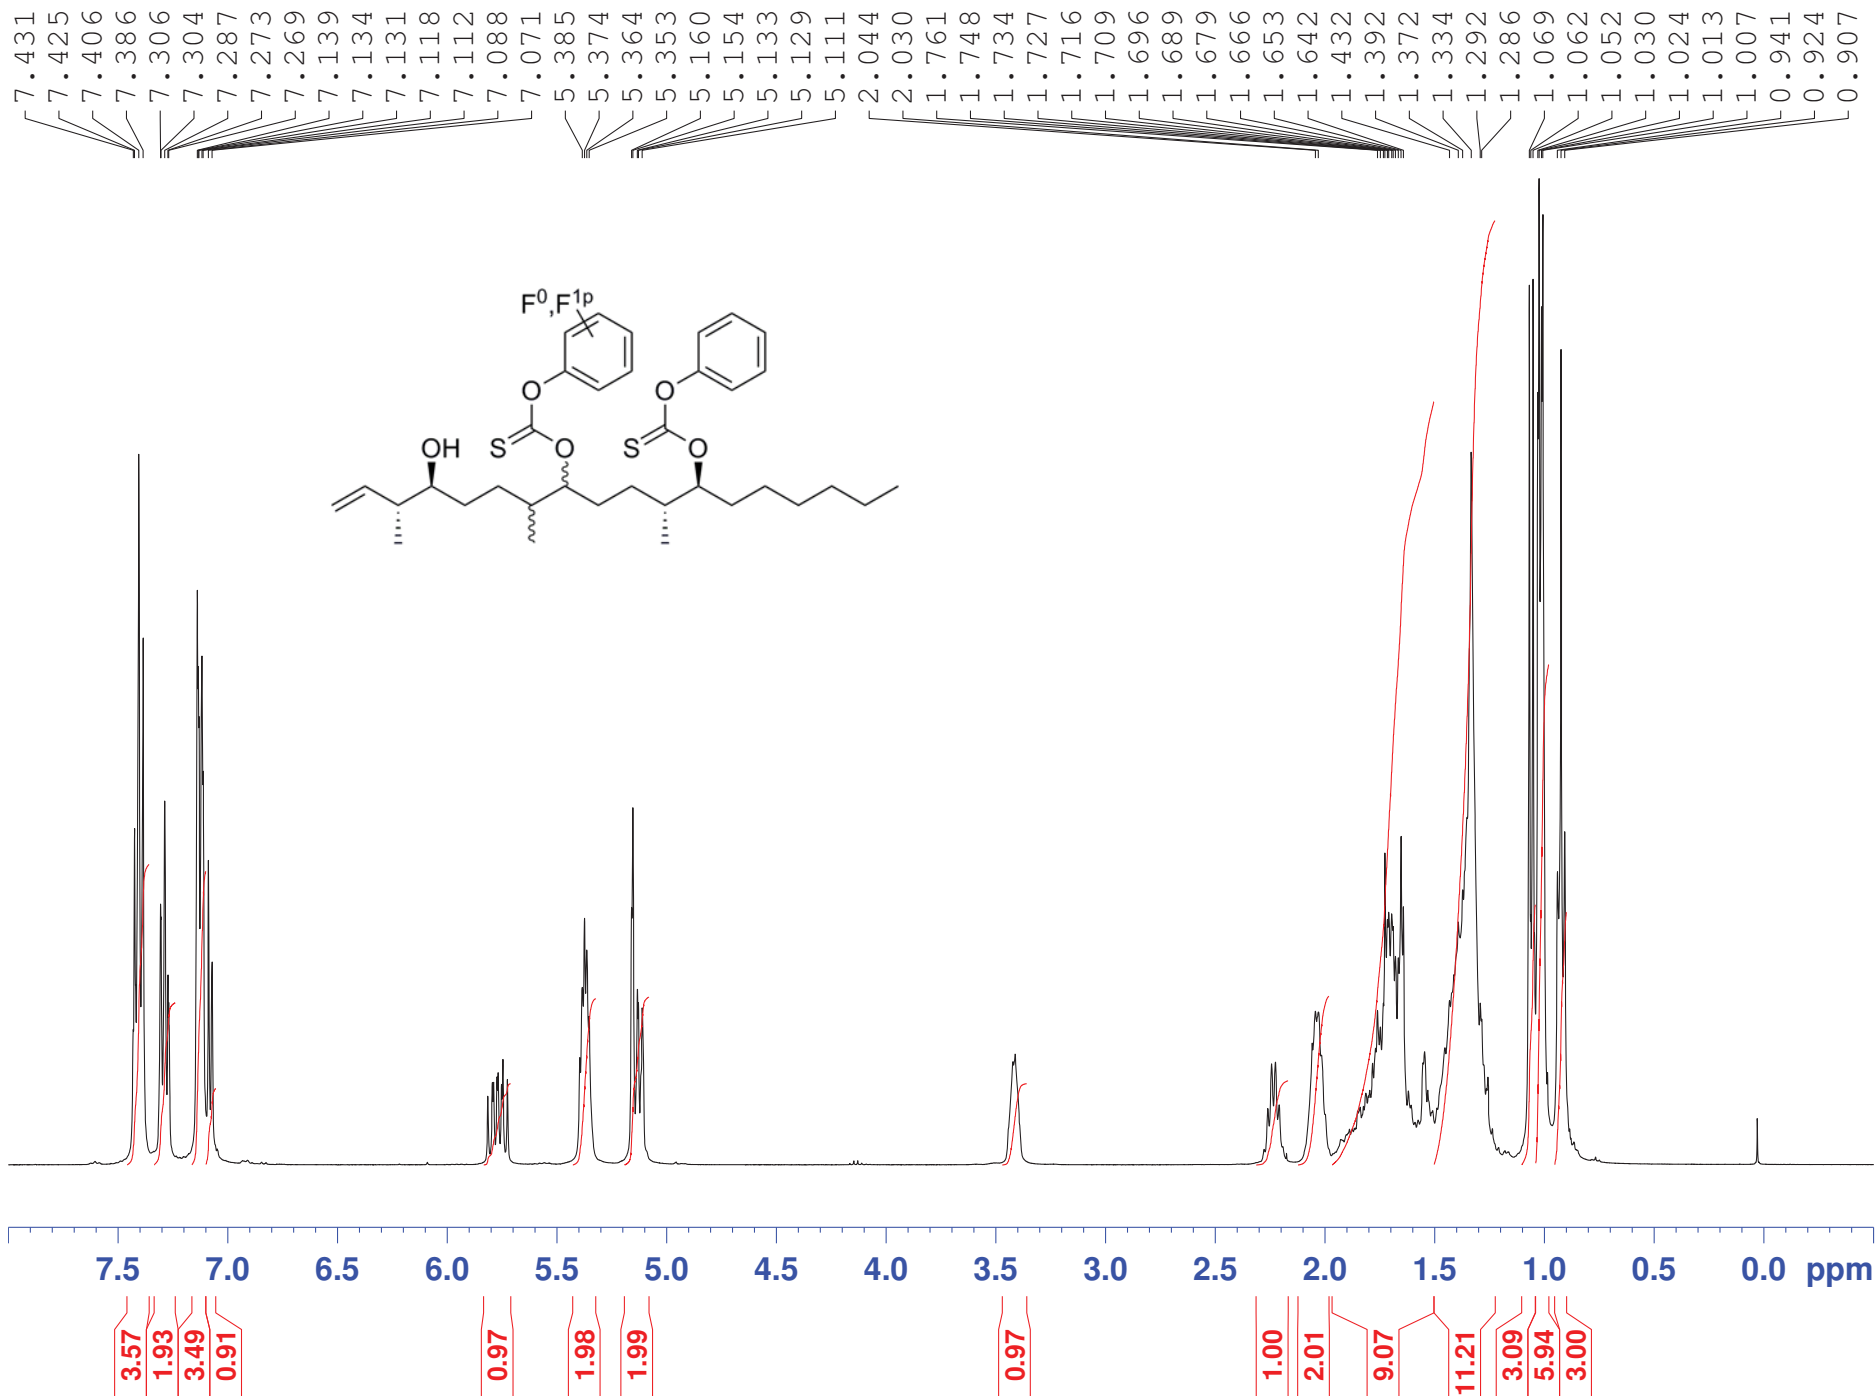



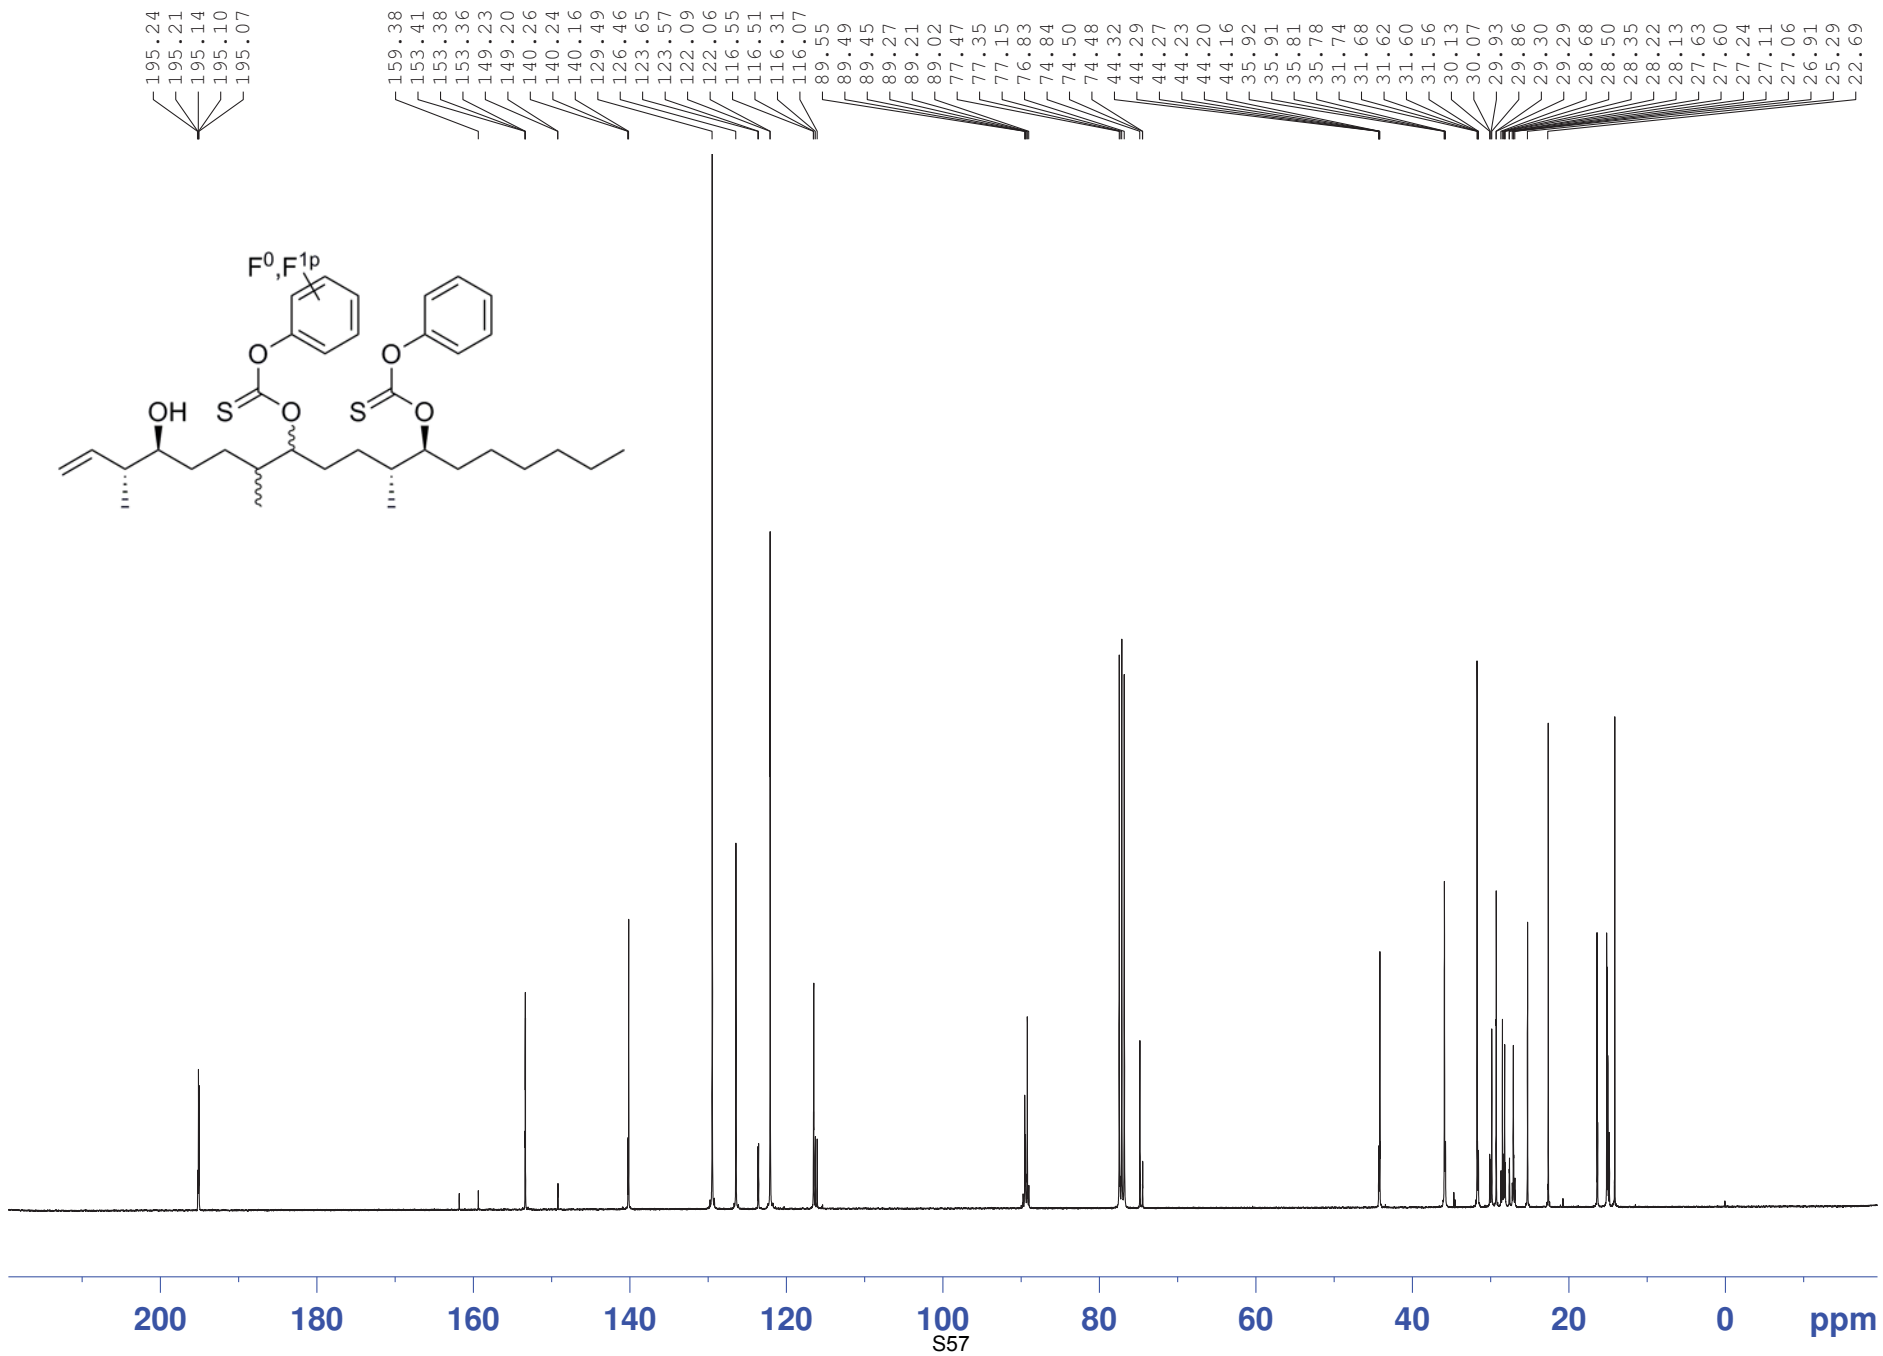

-115.78  
-115.79  
-115.80  
-115.82  
-115.83  
-115.85  
-115.86

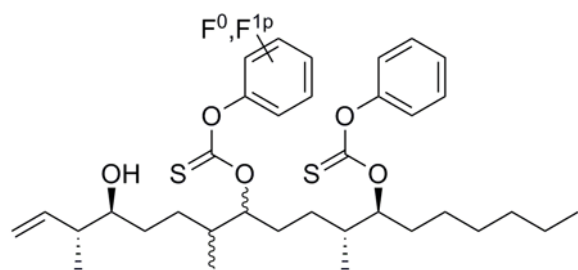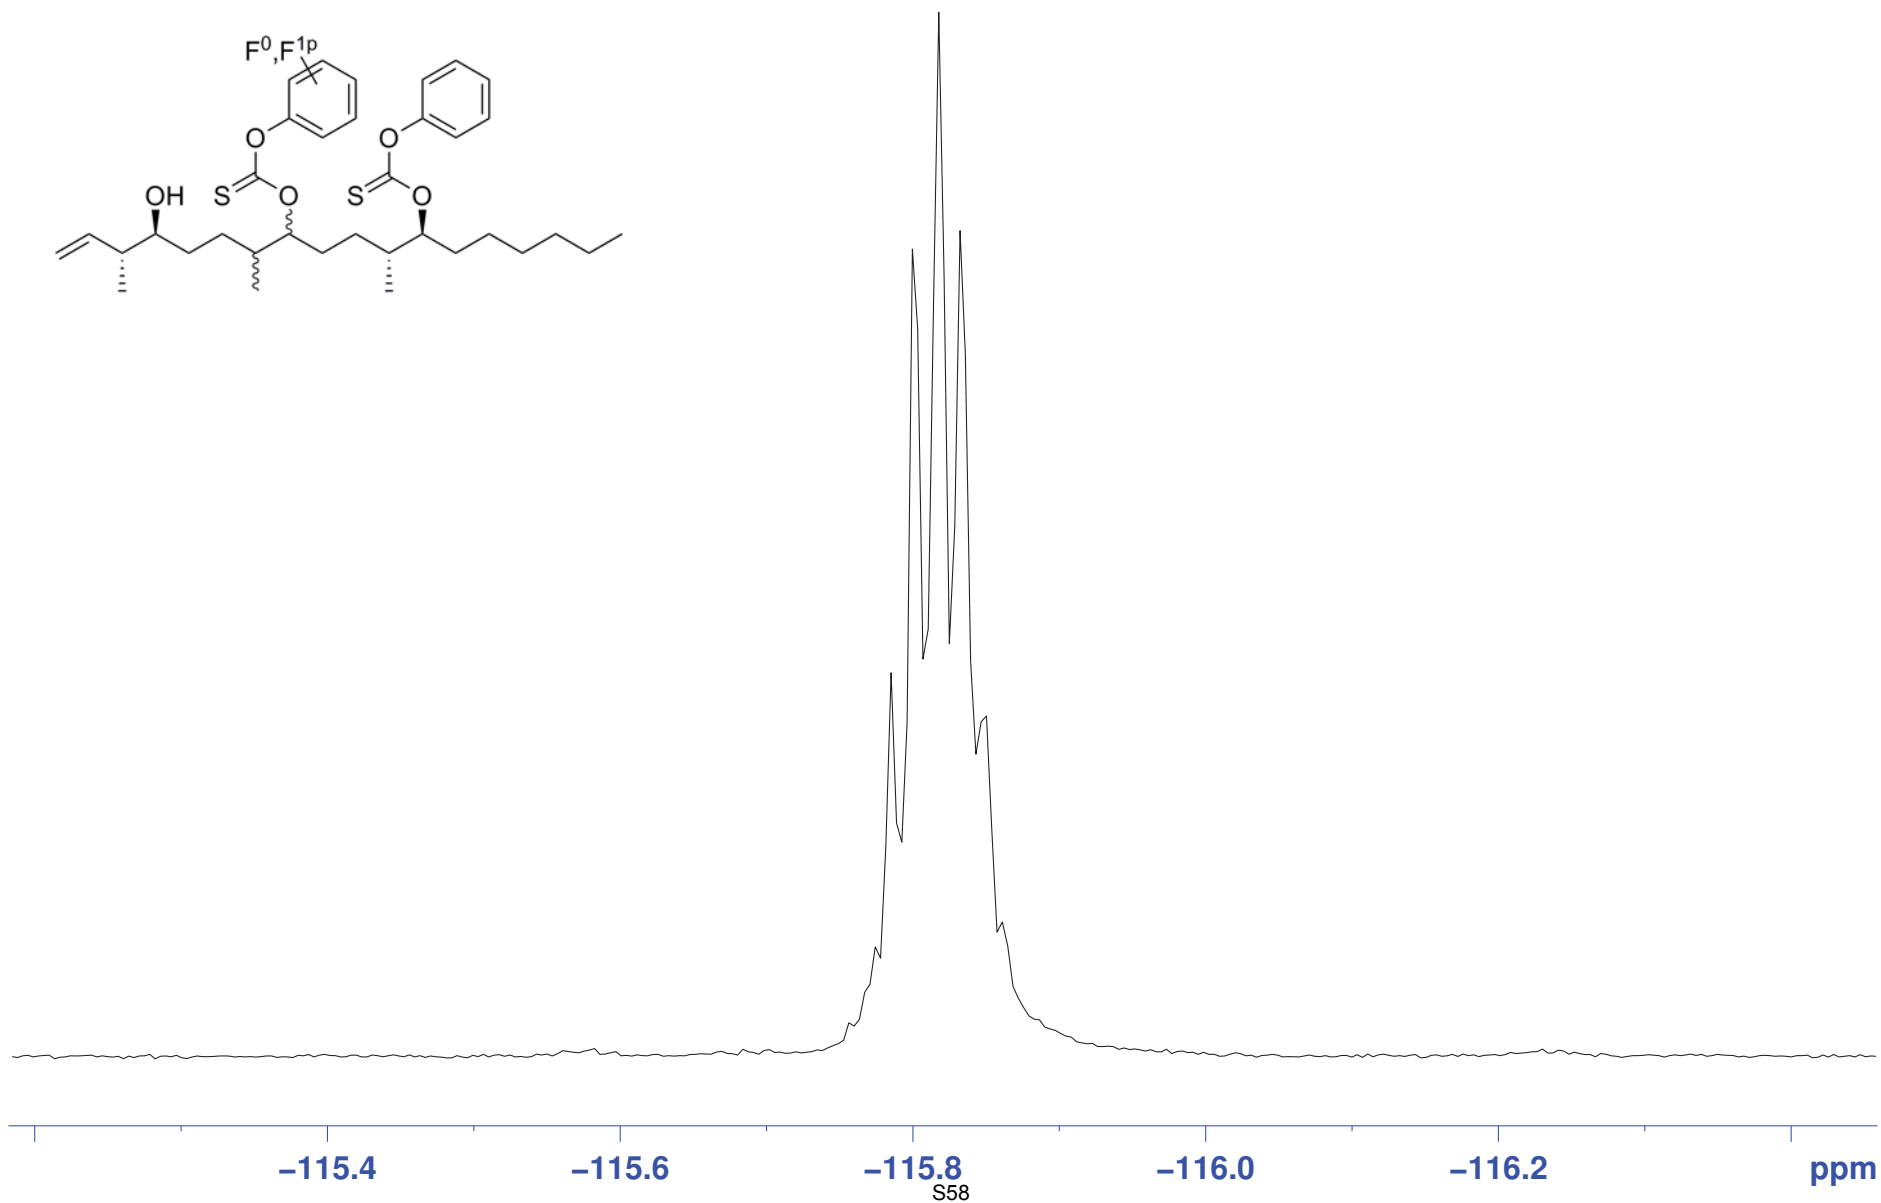

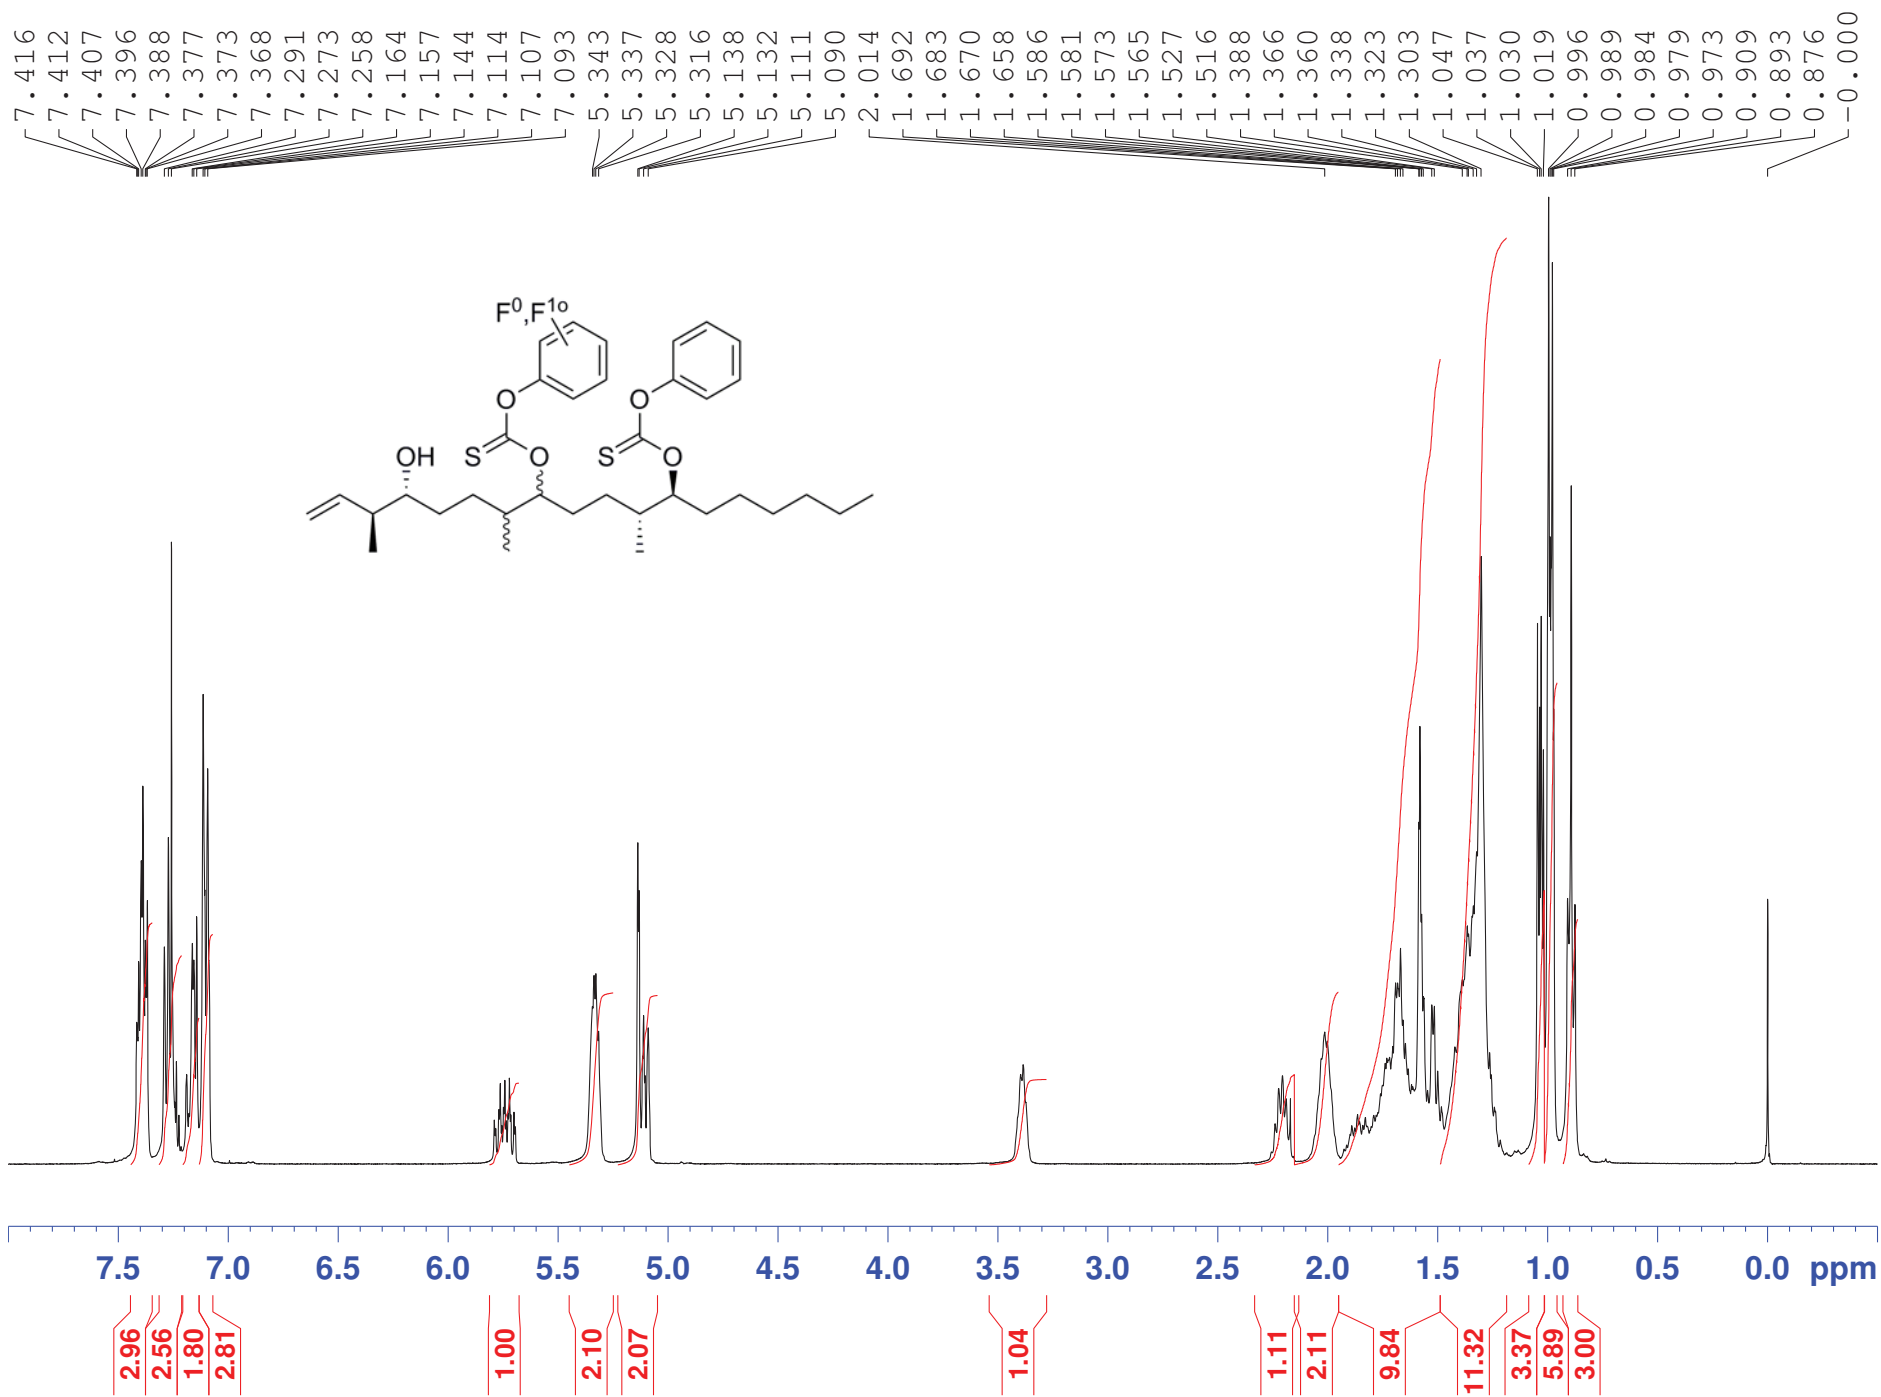

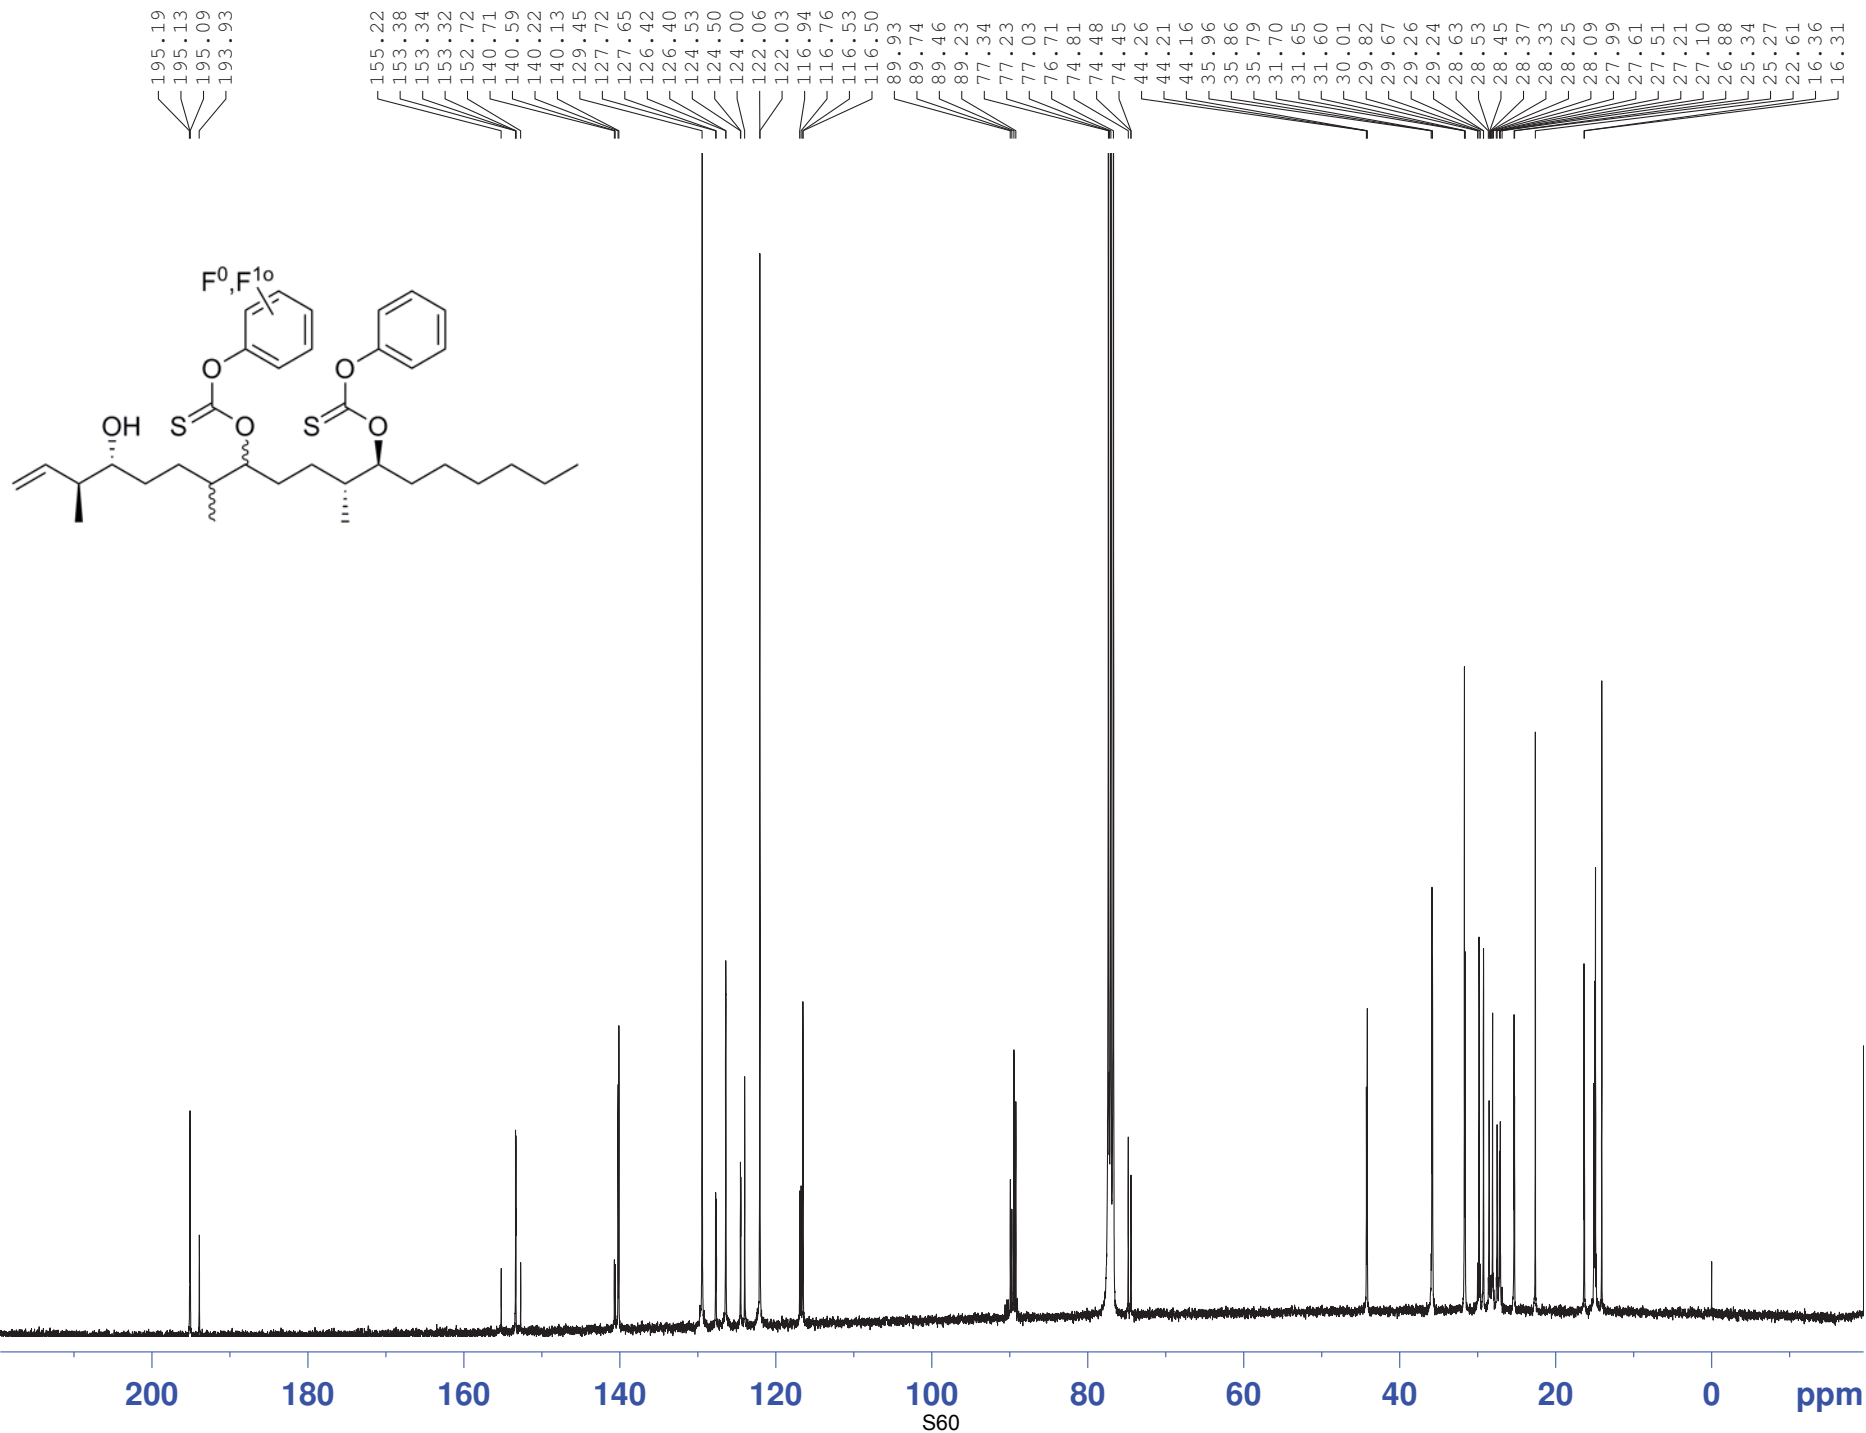

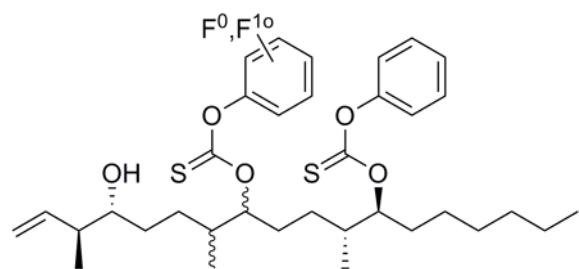

-128.04  
-128.05  
-128.07  
-128.08  
-128.09  
-128.12

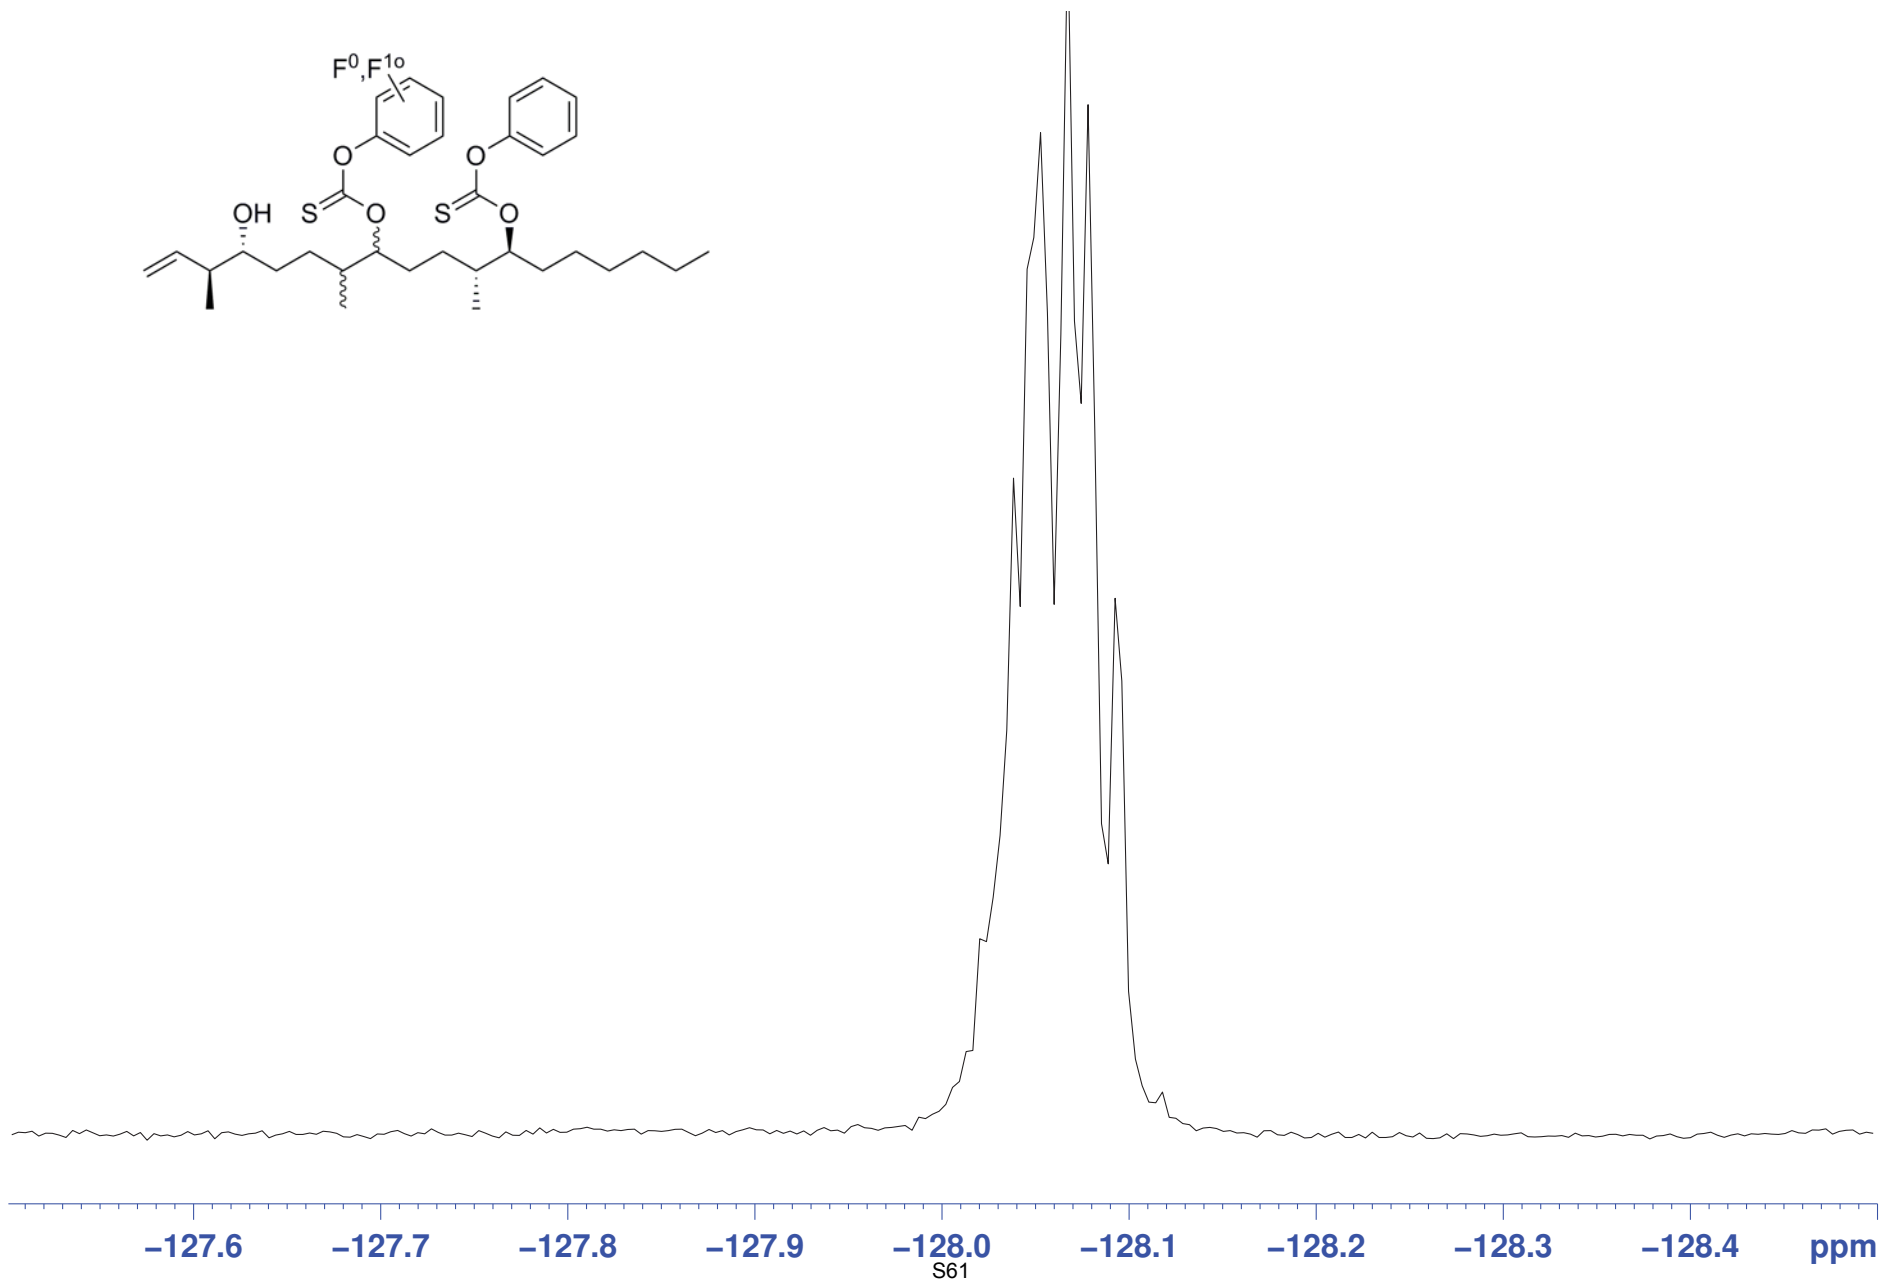

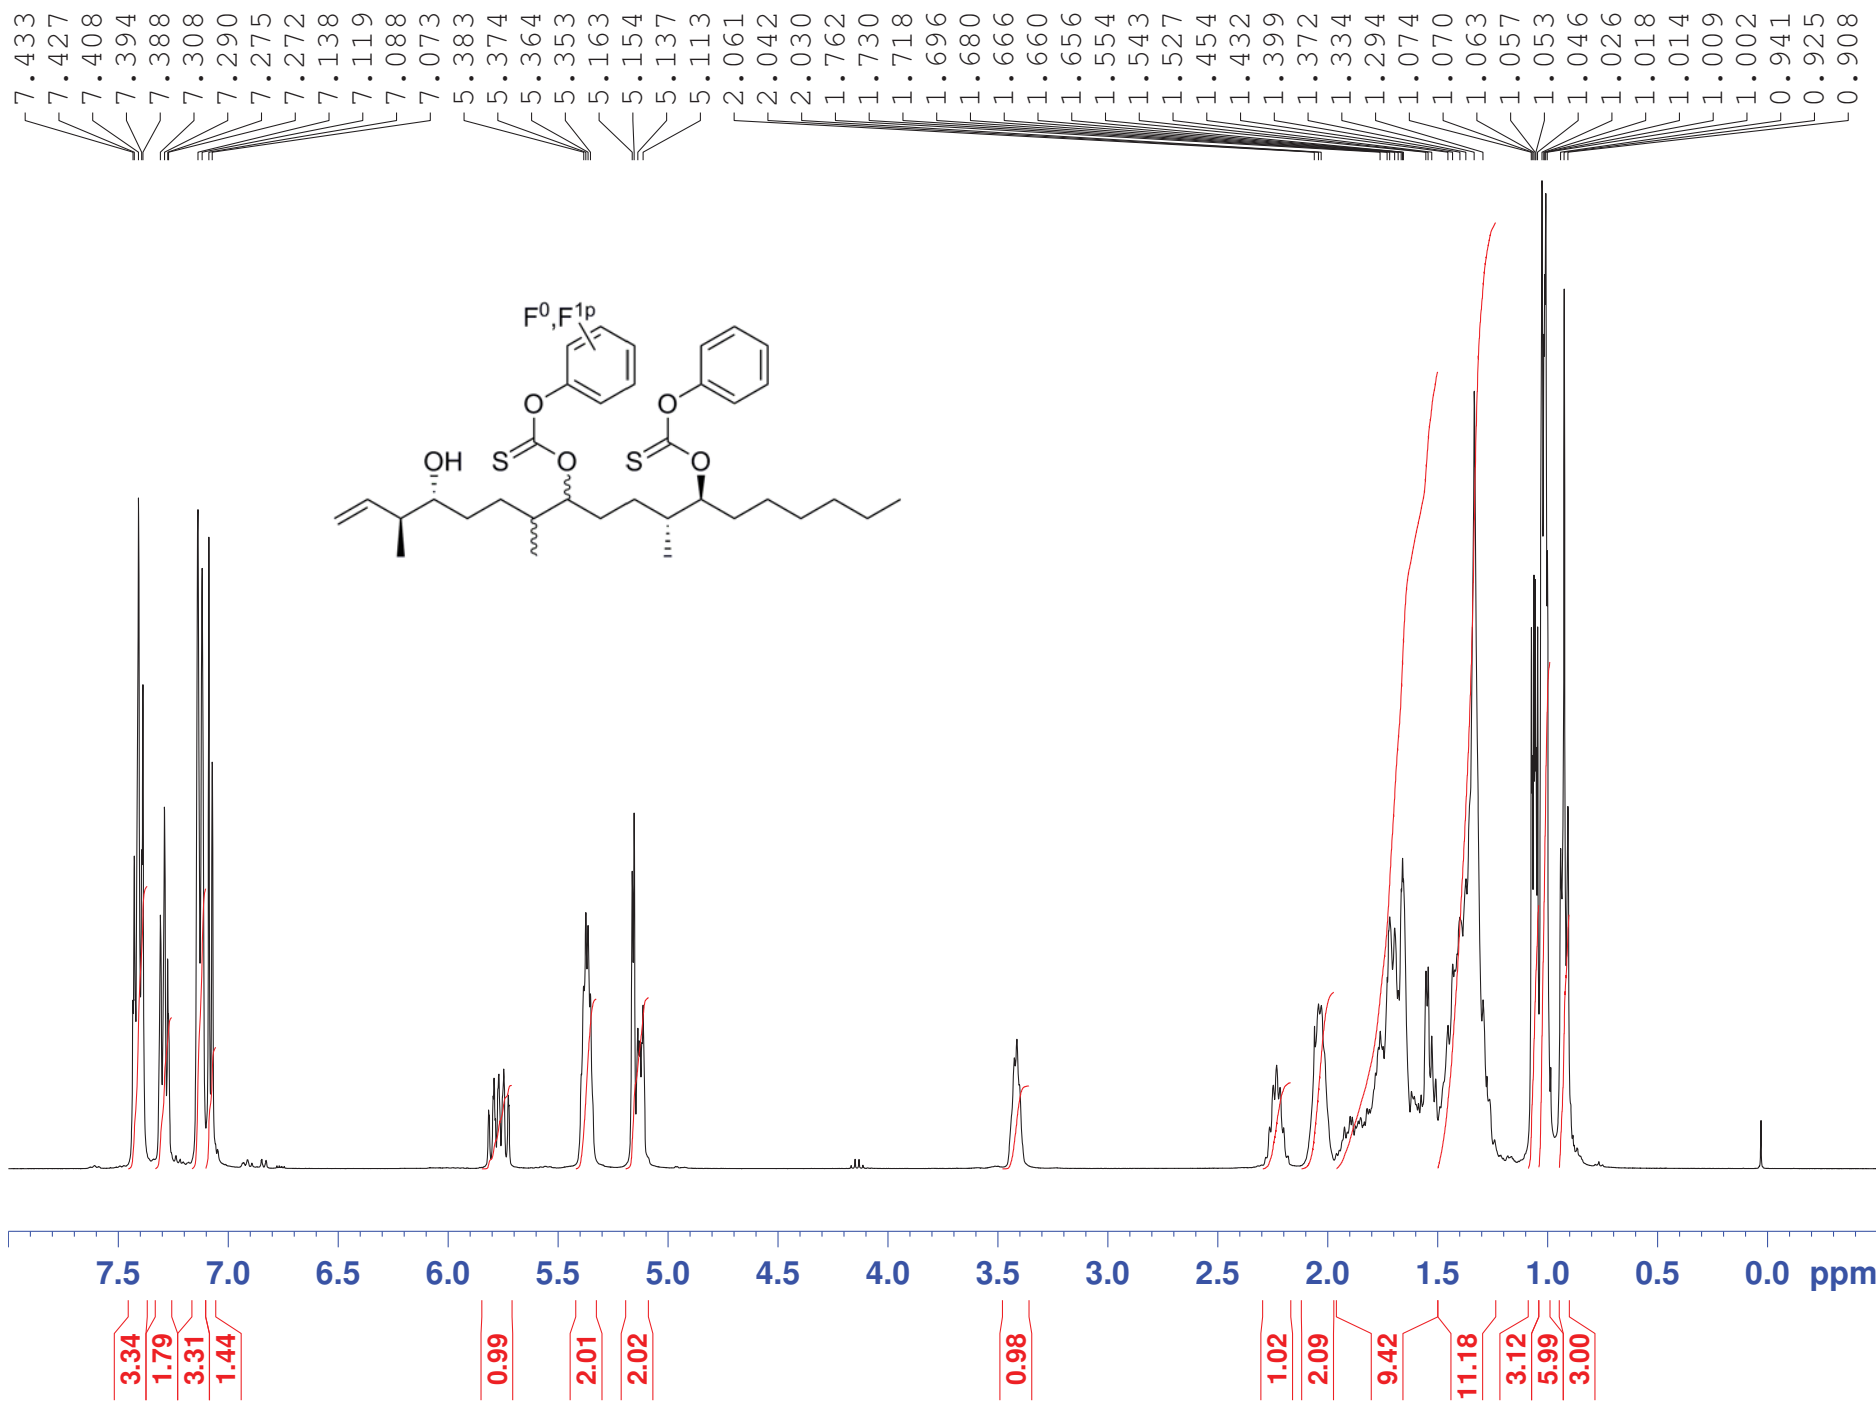

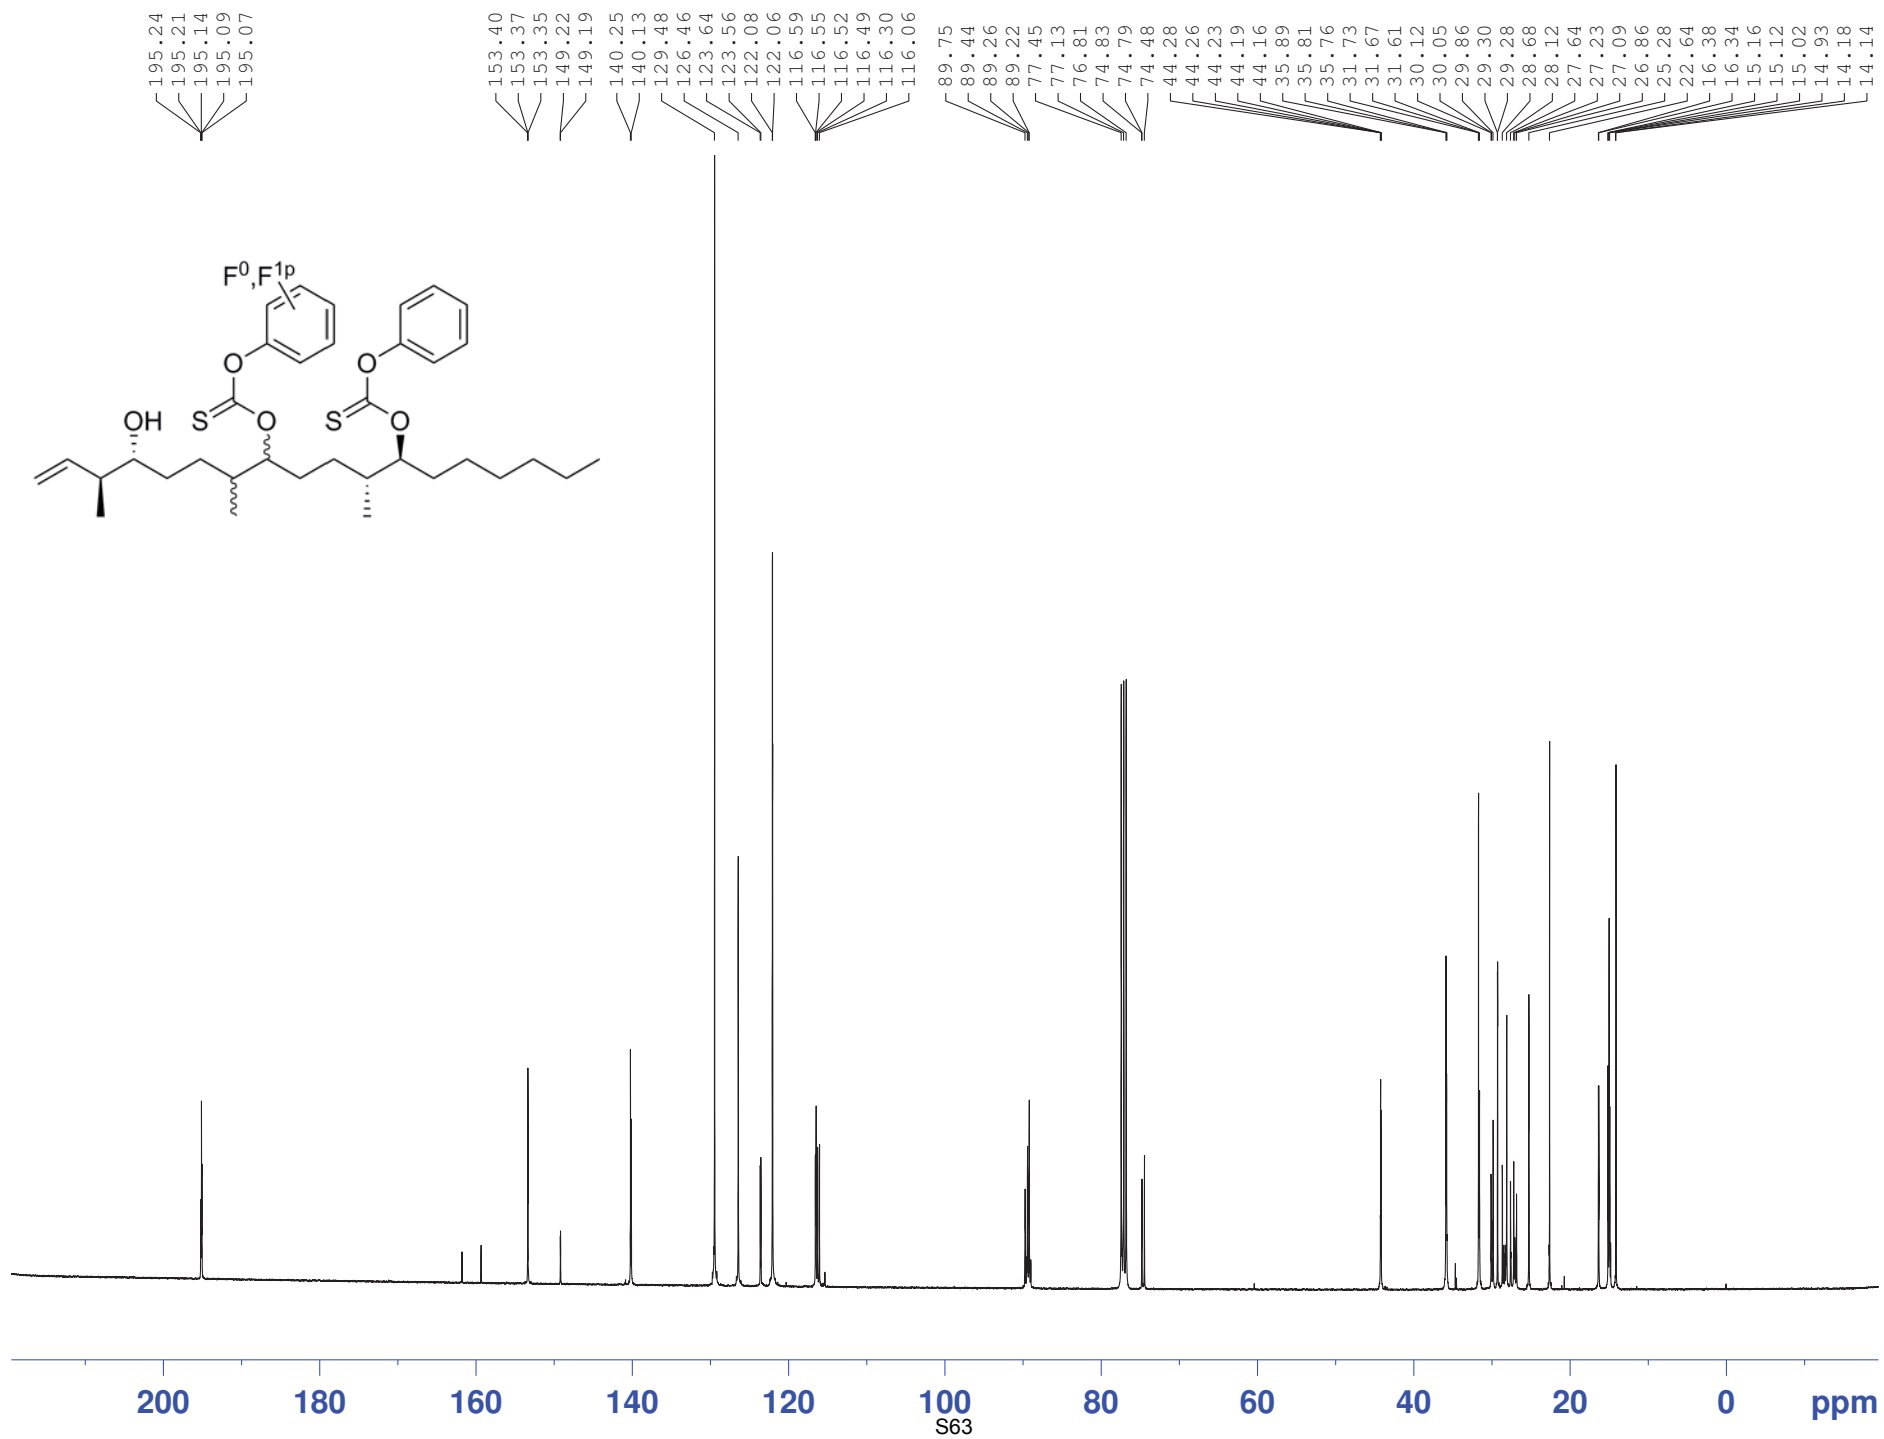

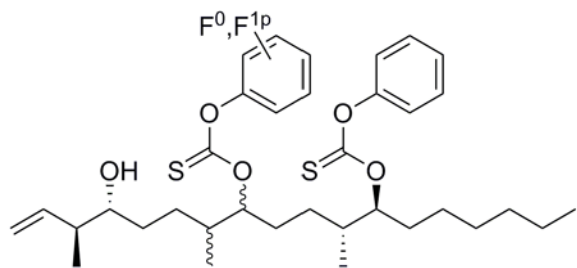

-115.80  
-115.82  
-115.84  
-115.85

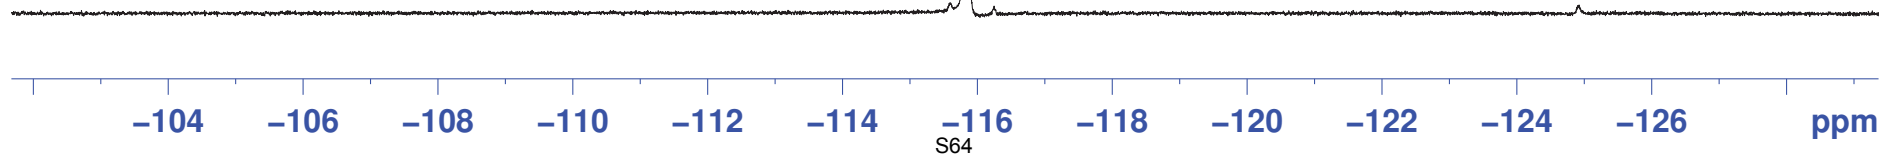

S64



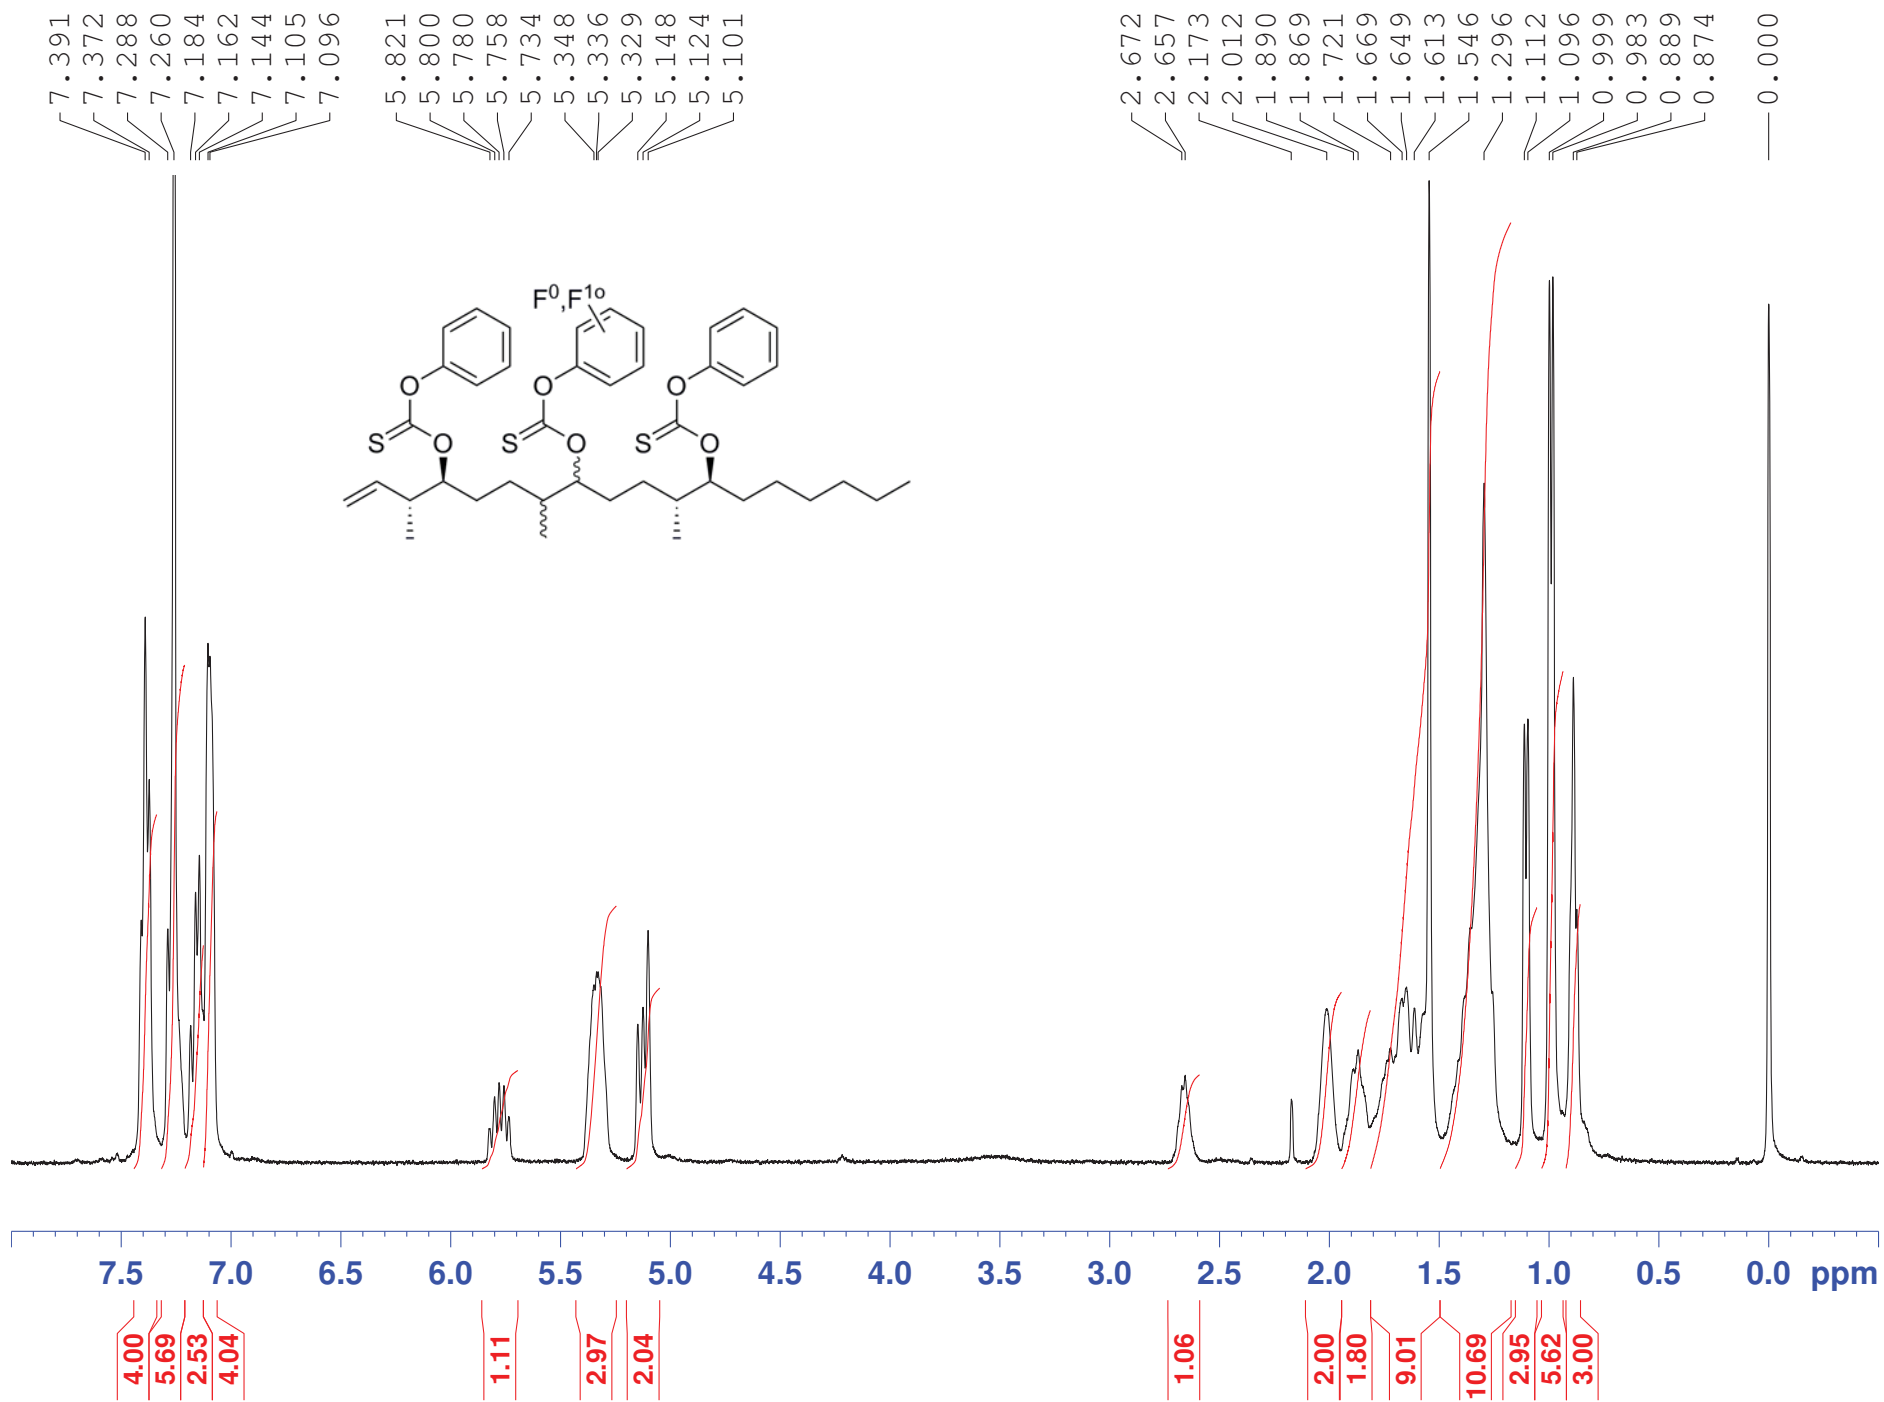

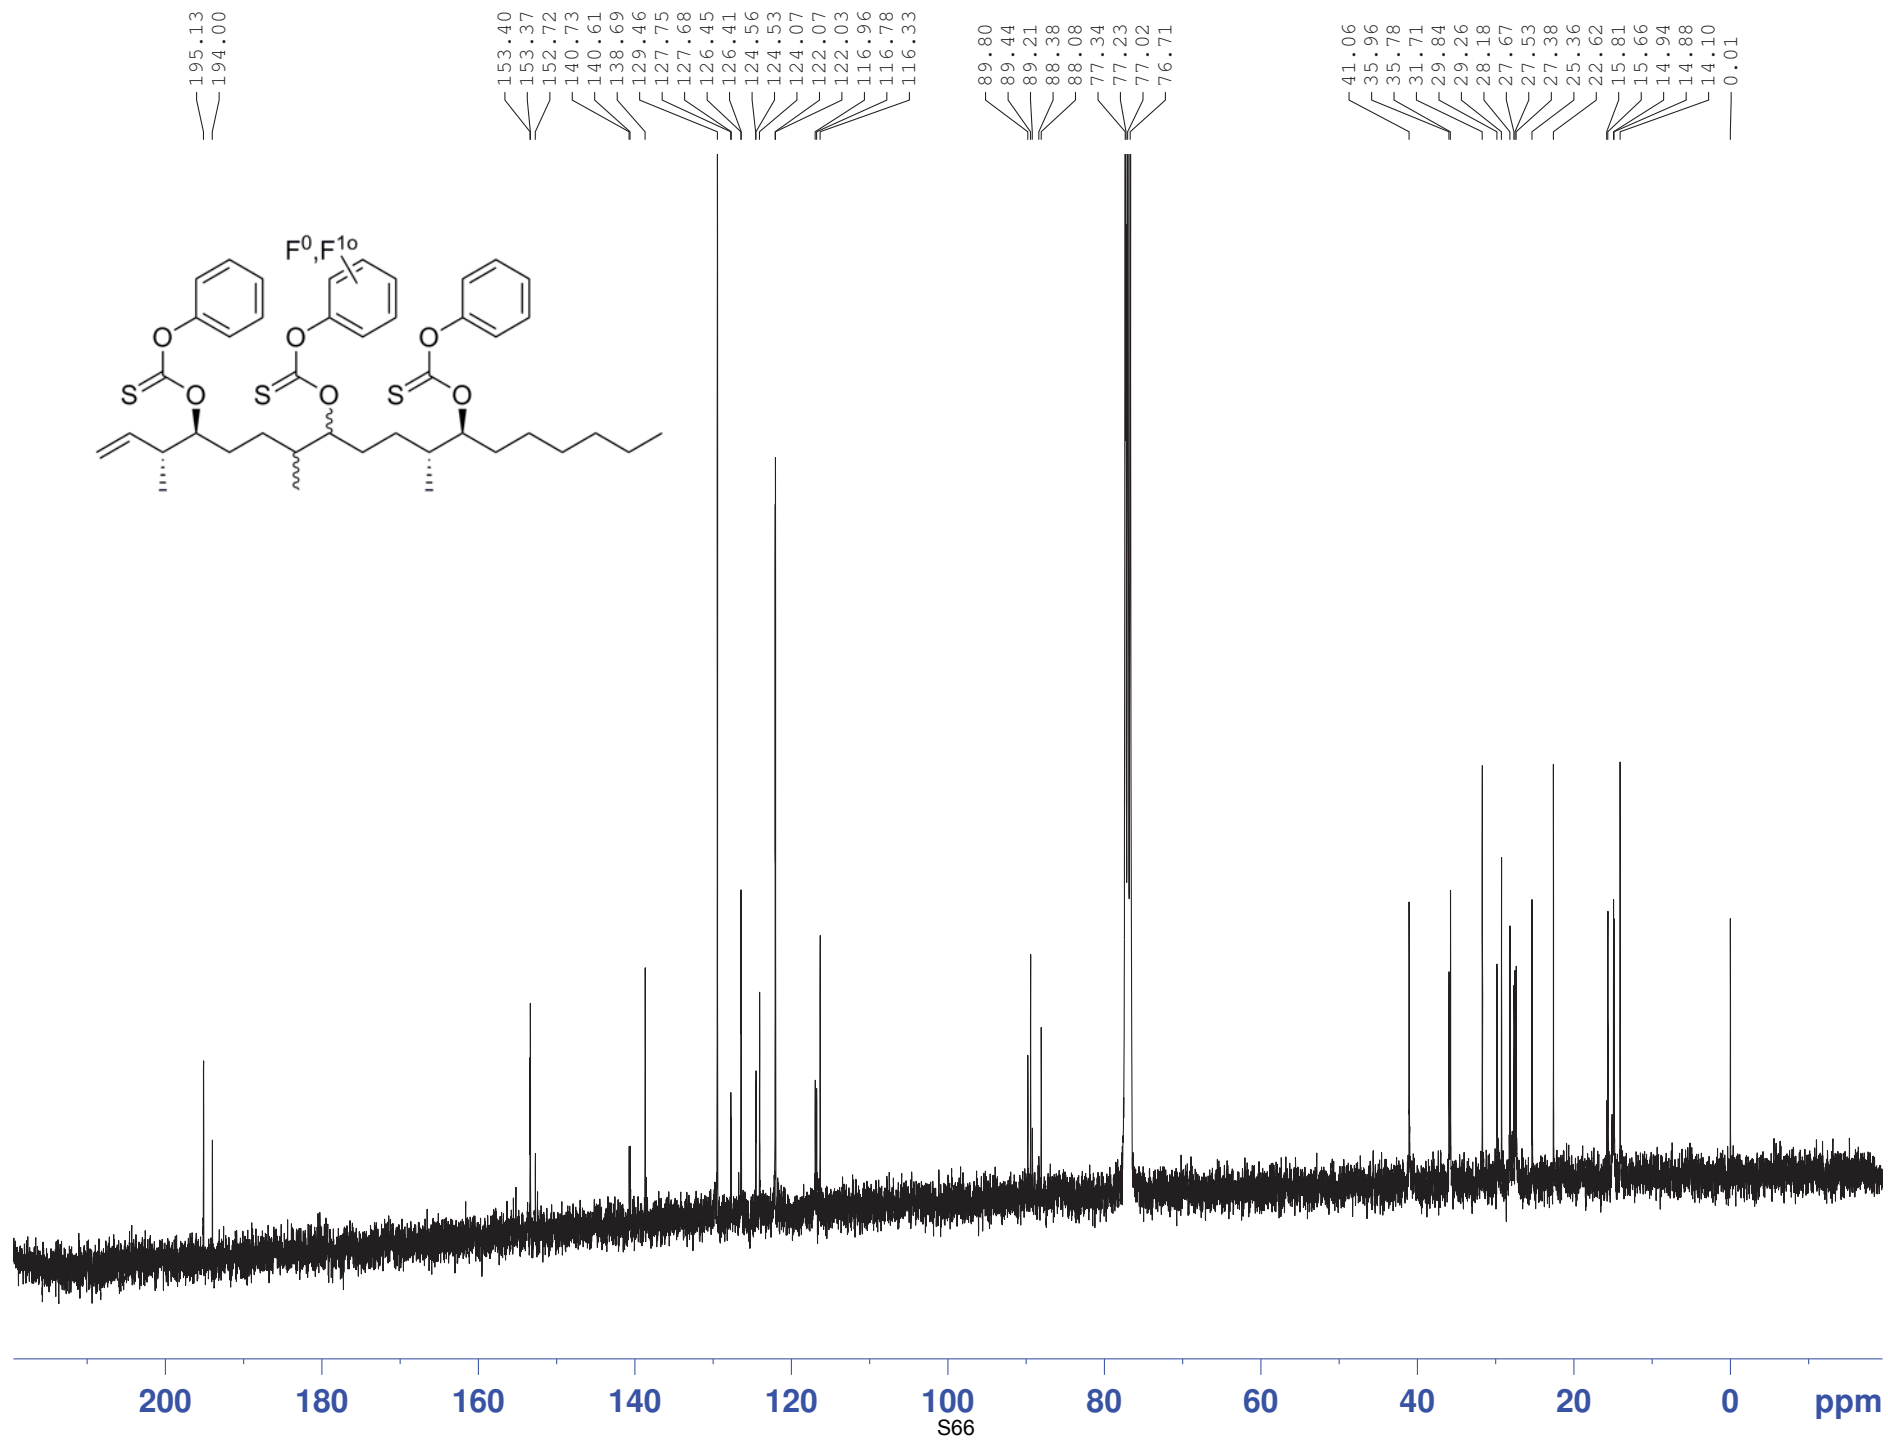

-128.02  
-128.04

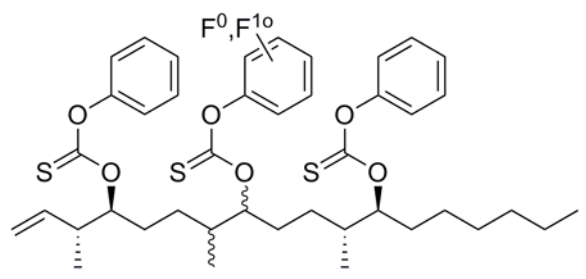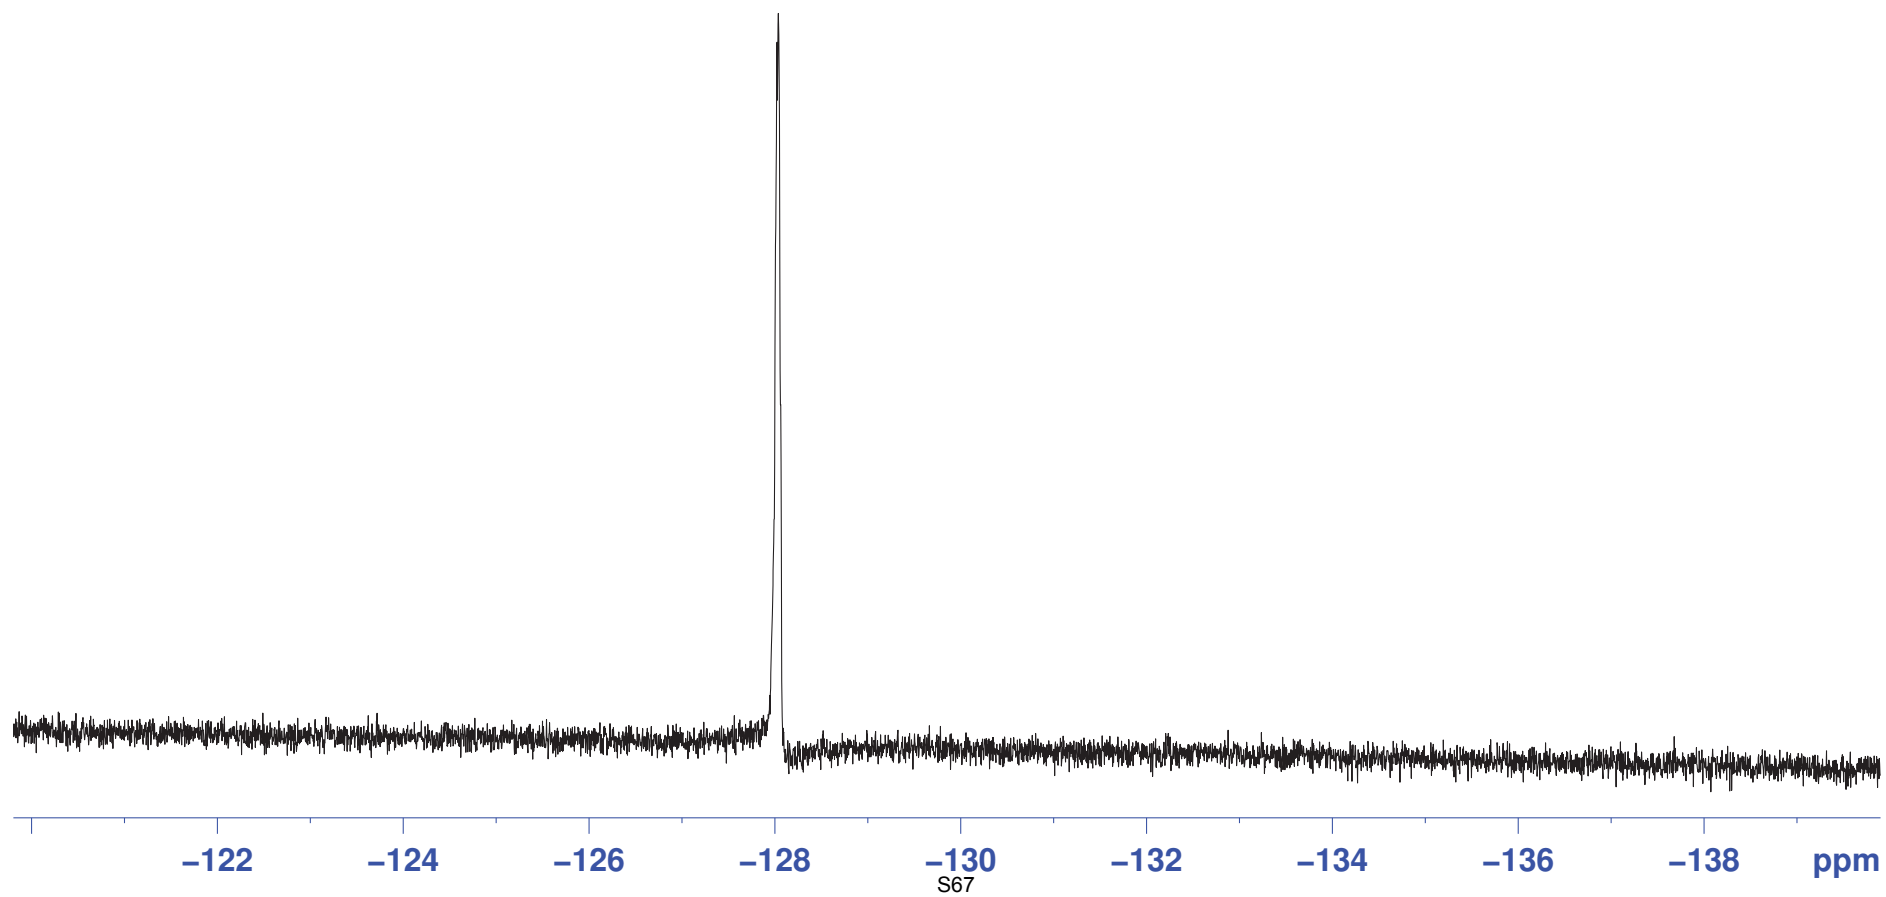

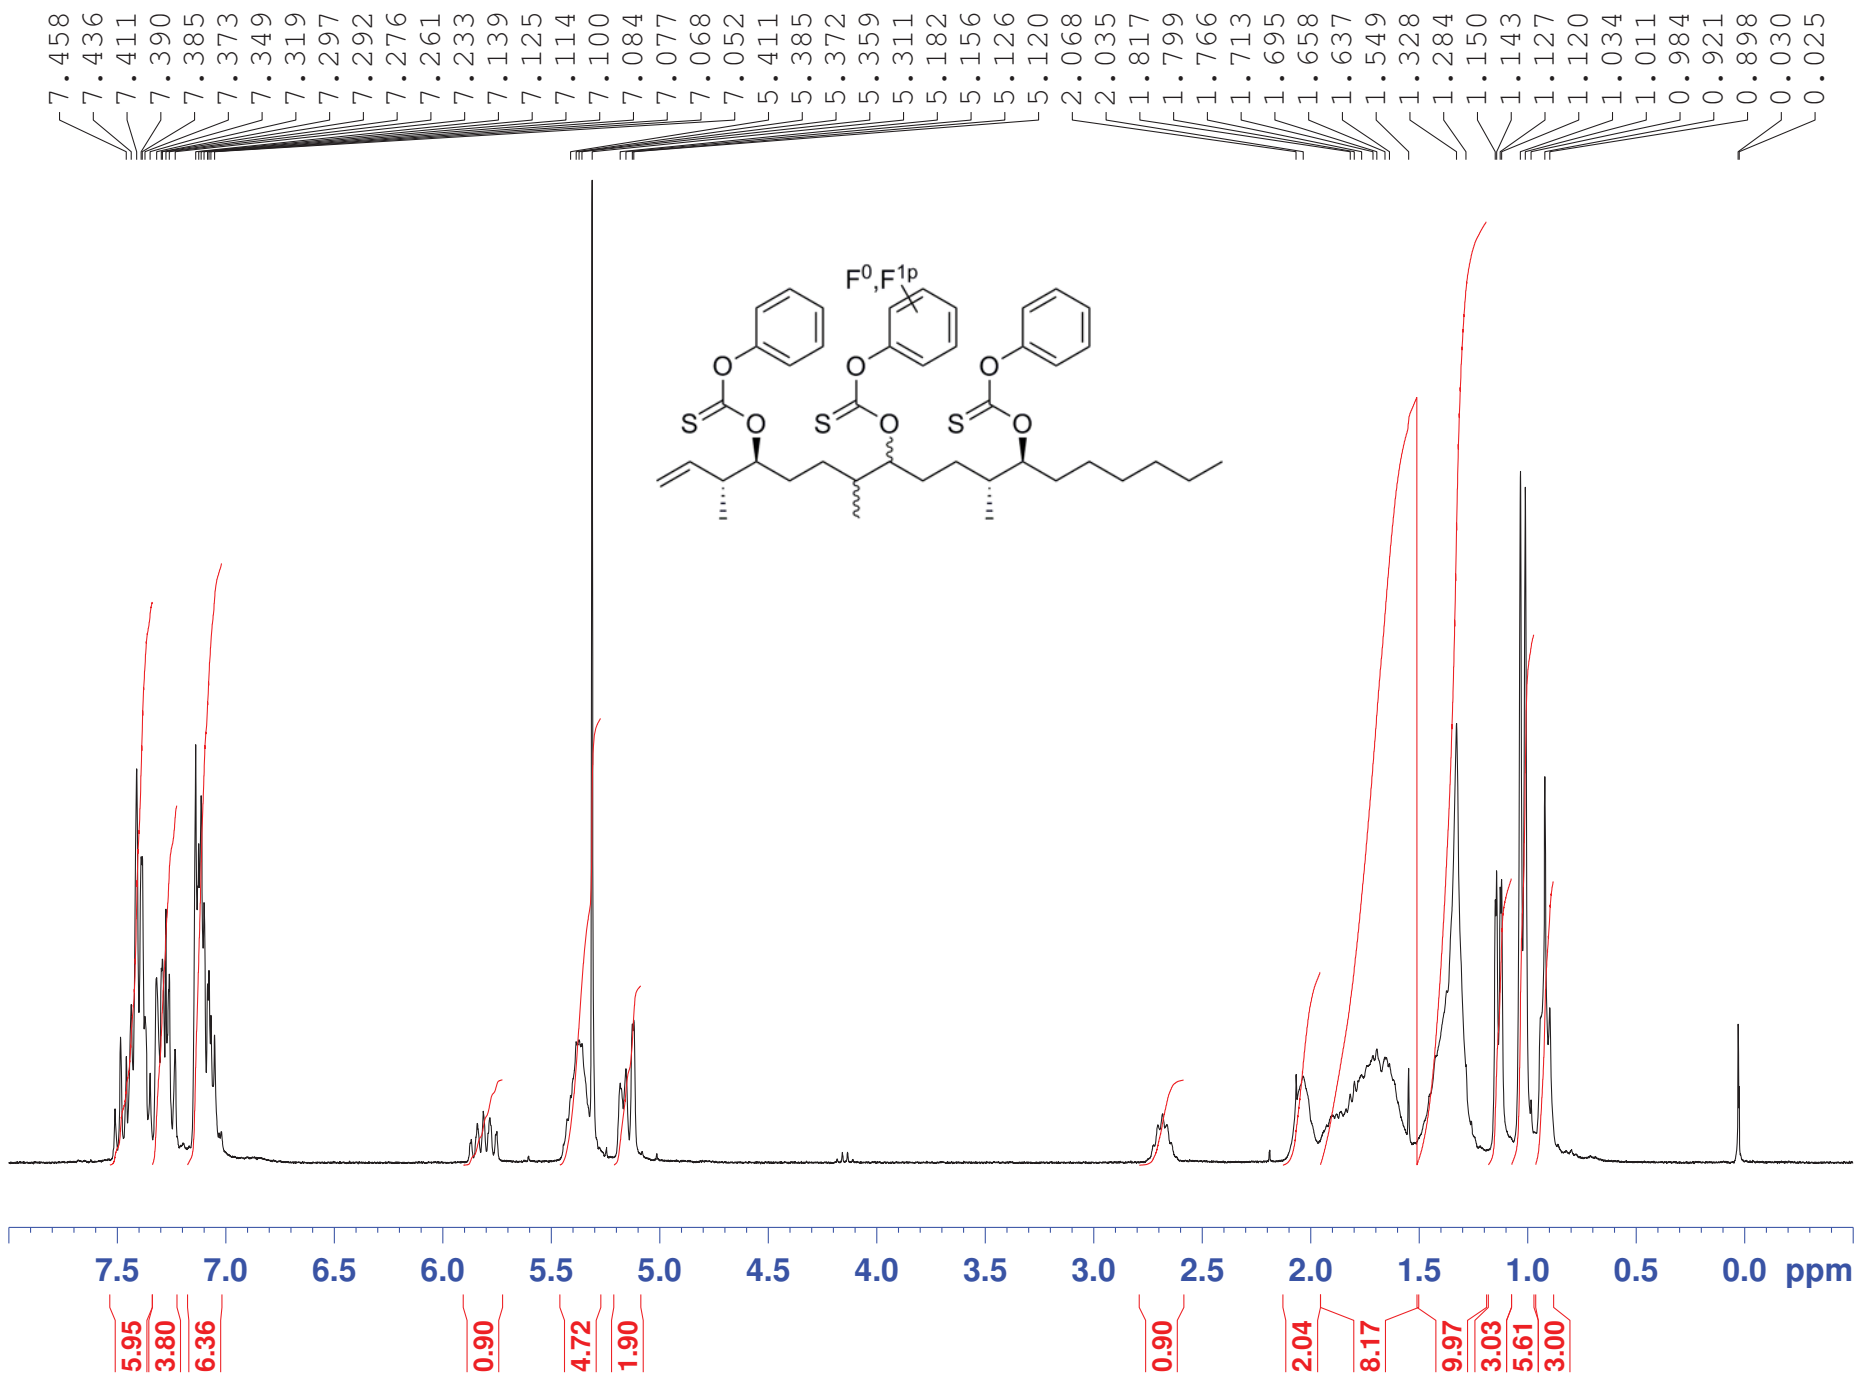

Yeh and coworkers

Trimethylnonadecanol stereoisomer library

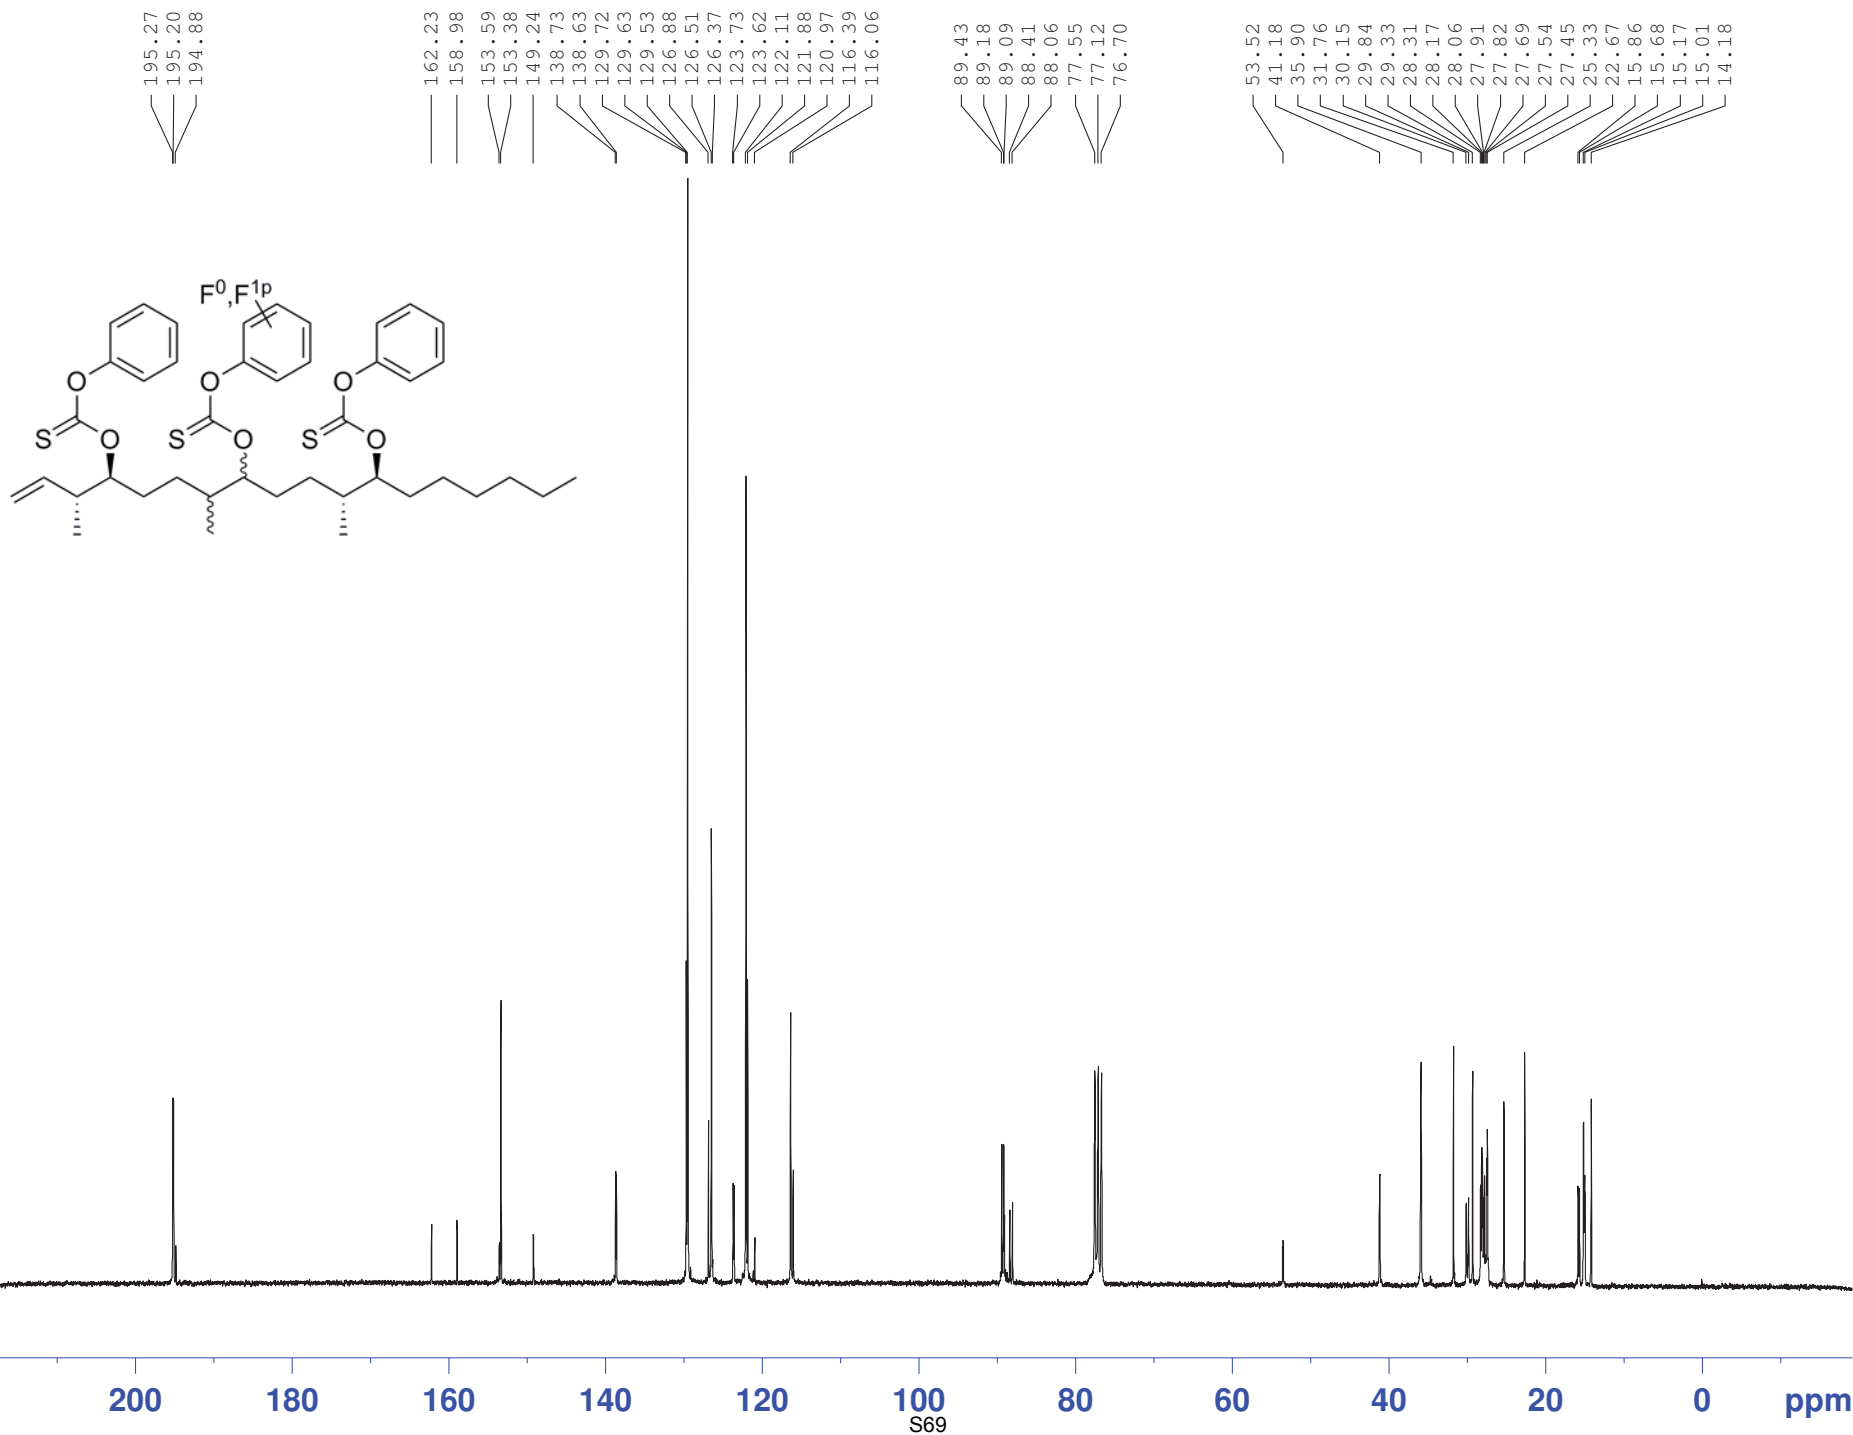



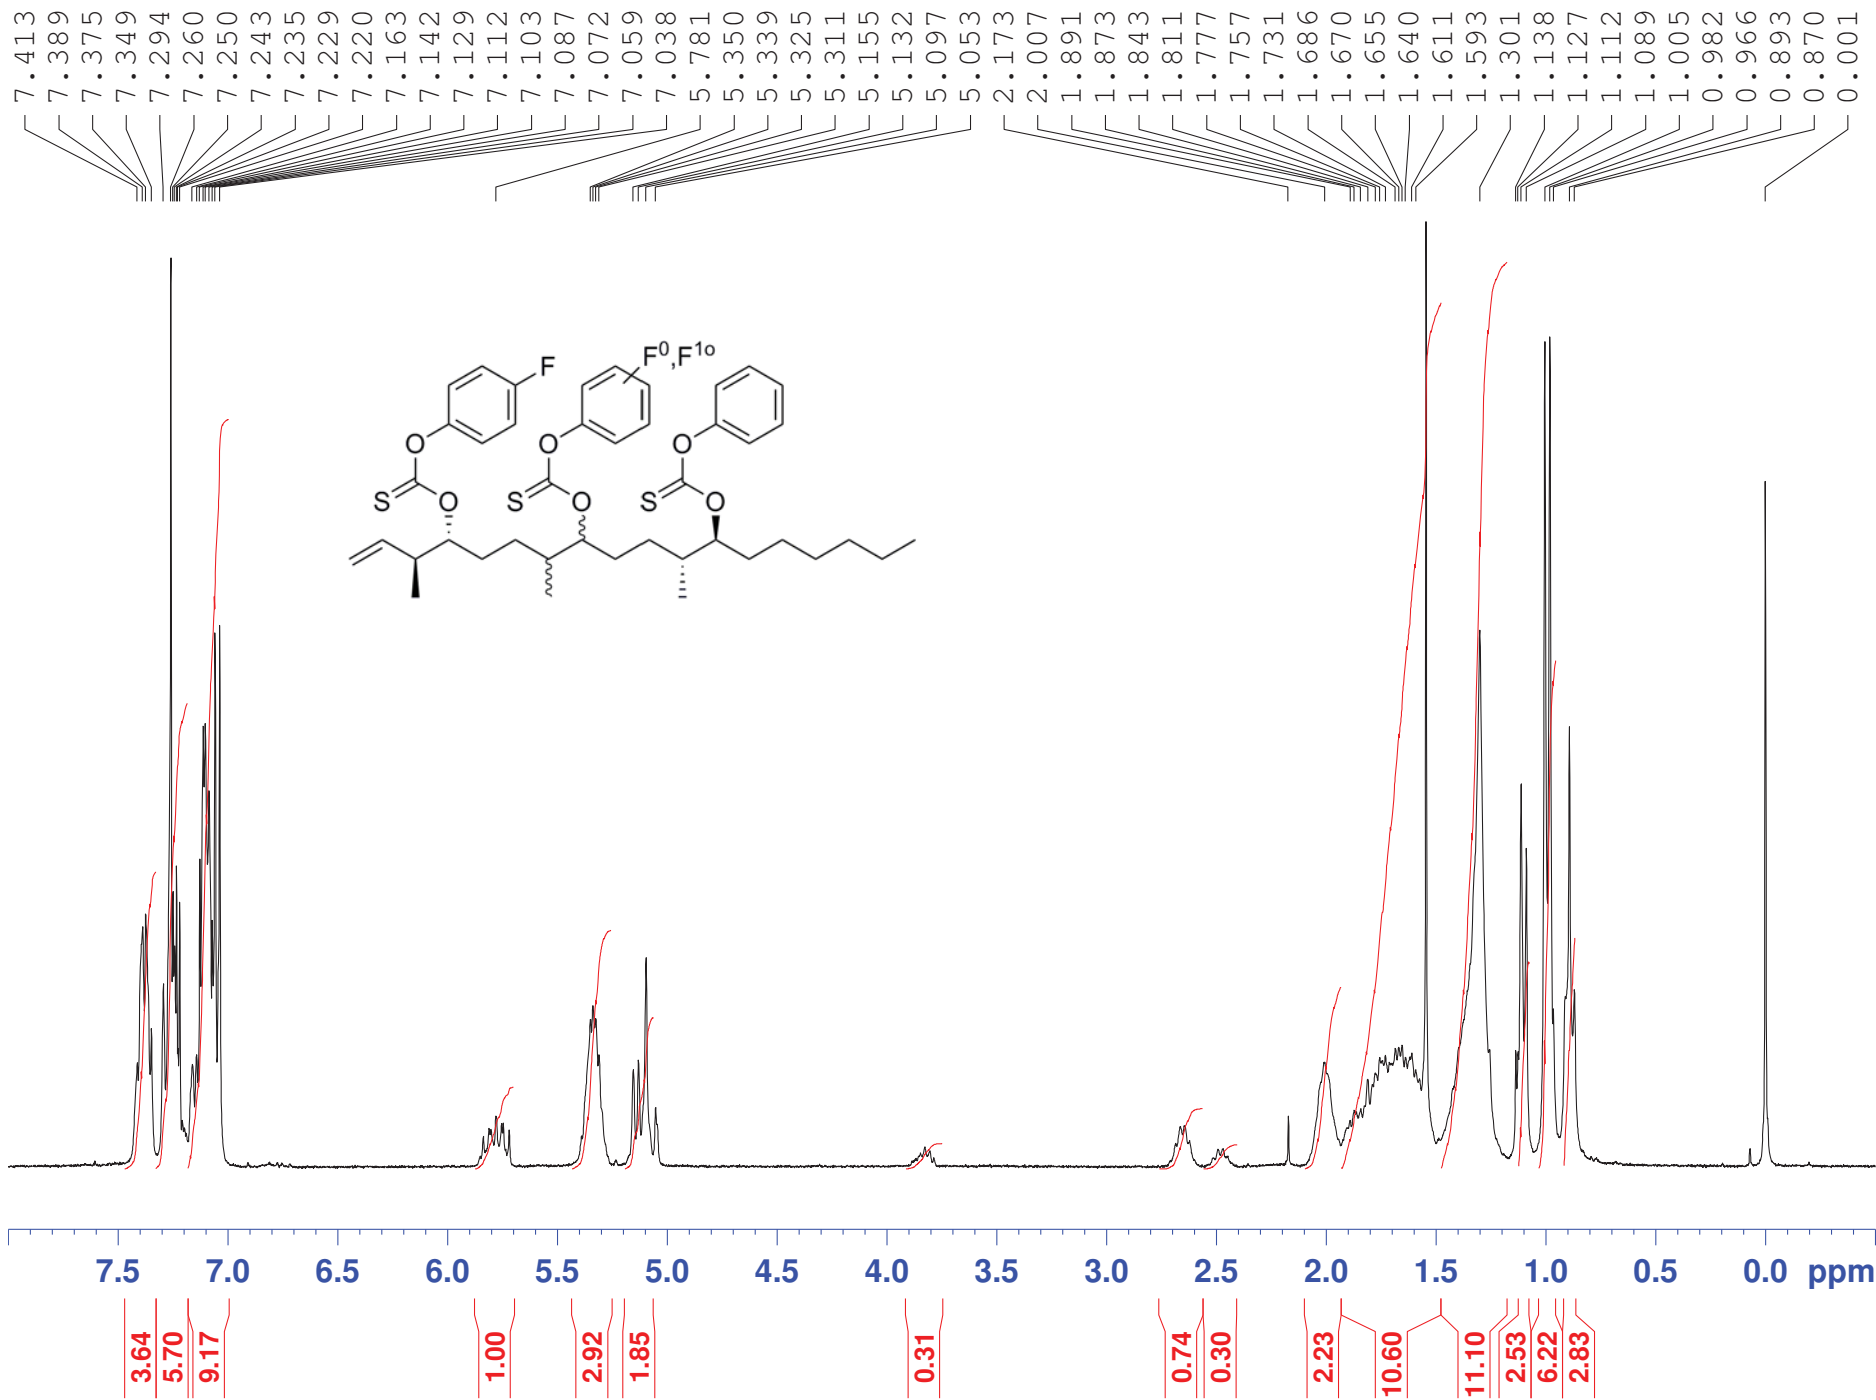

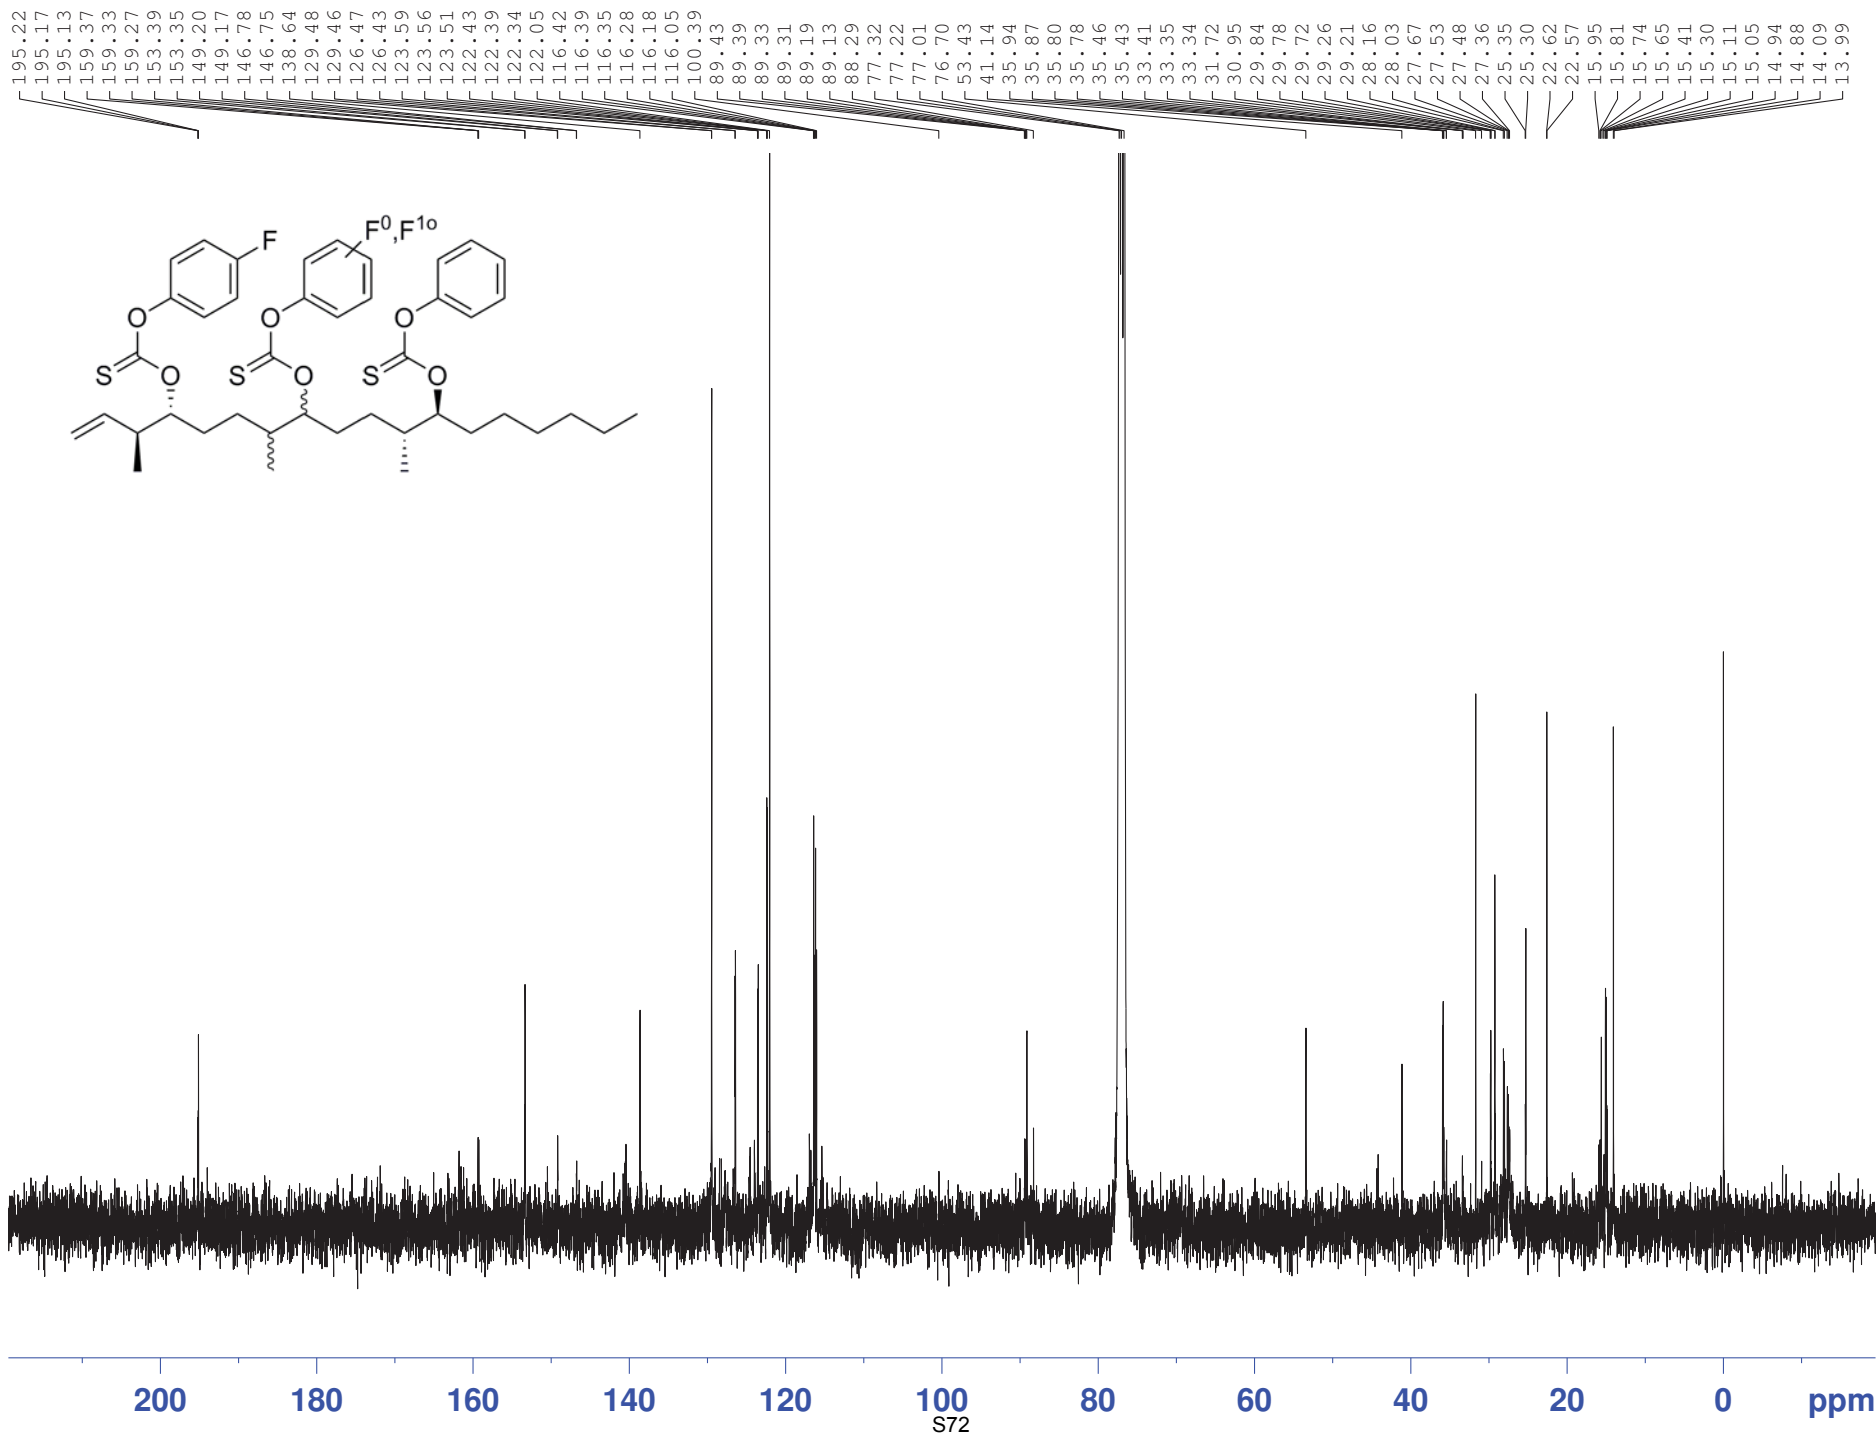



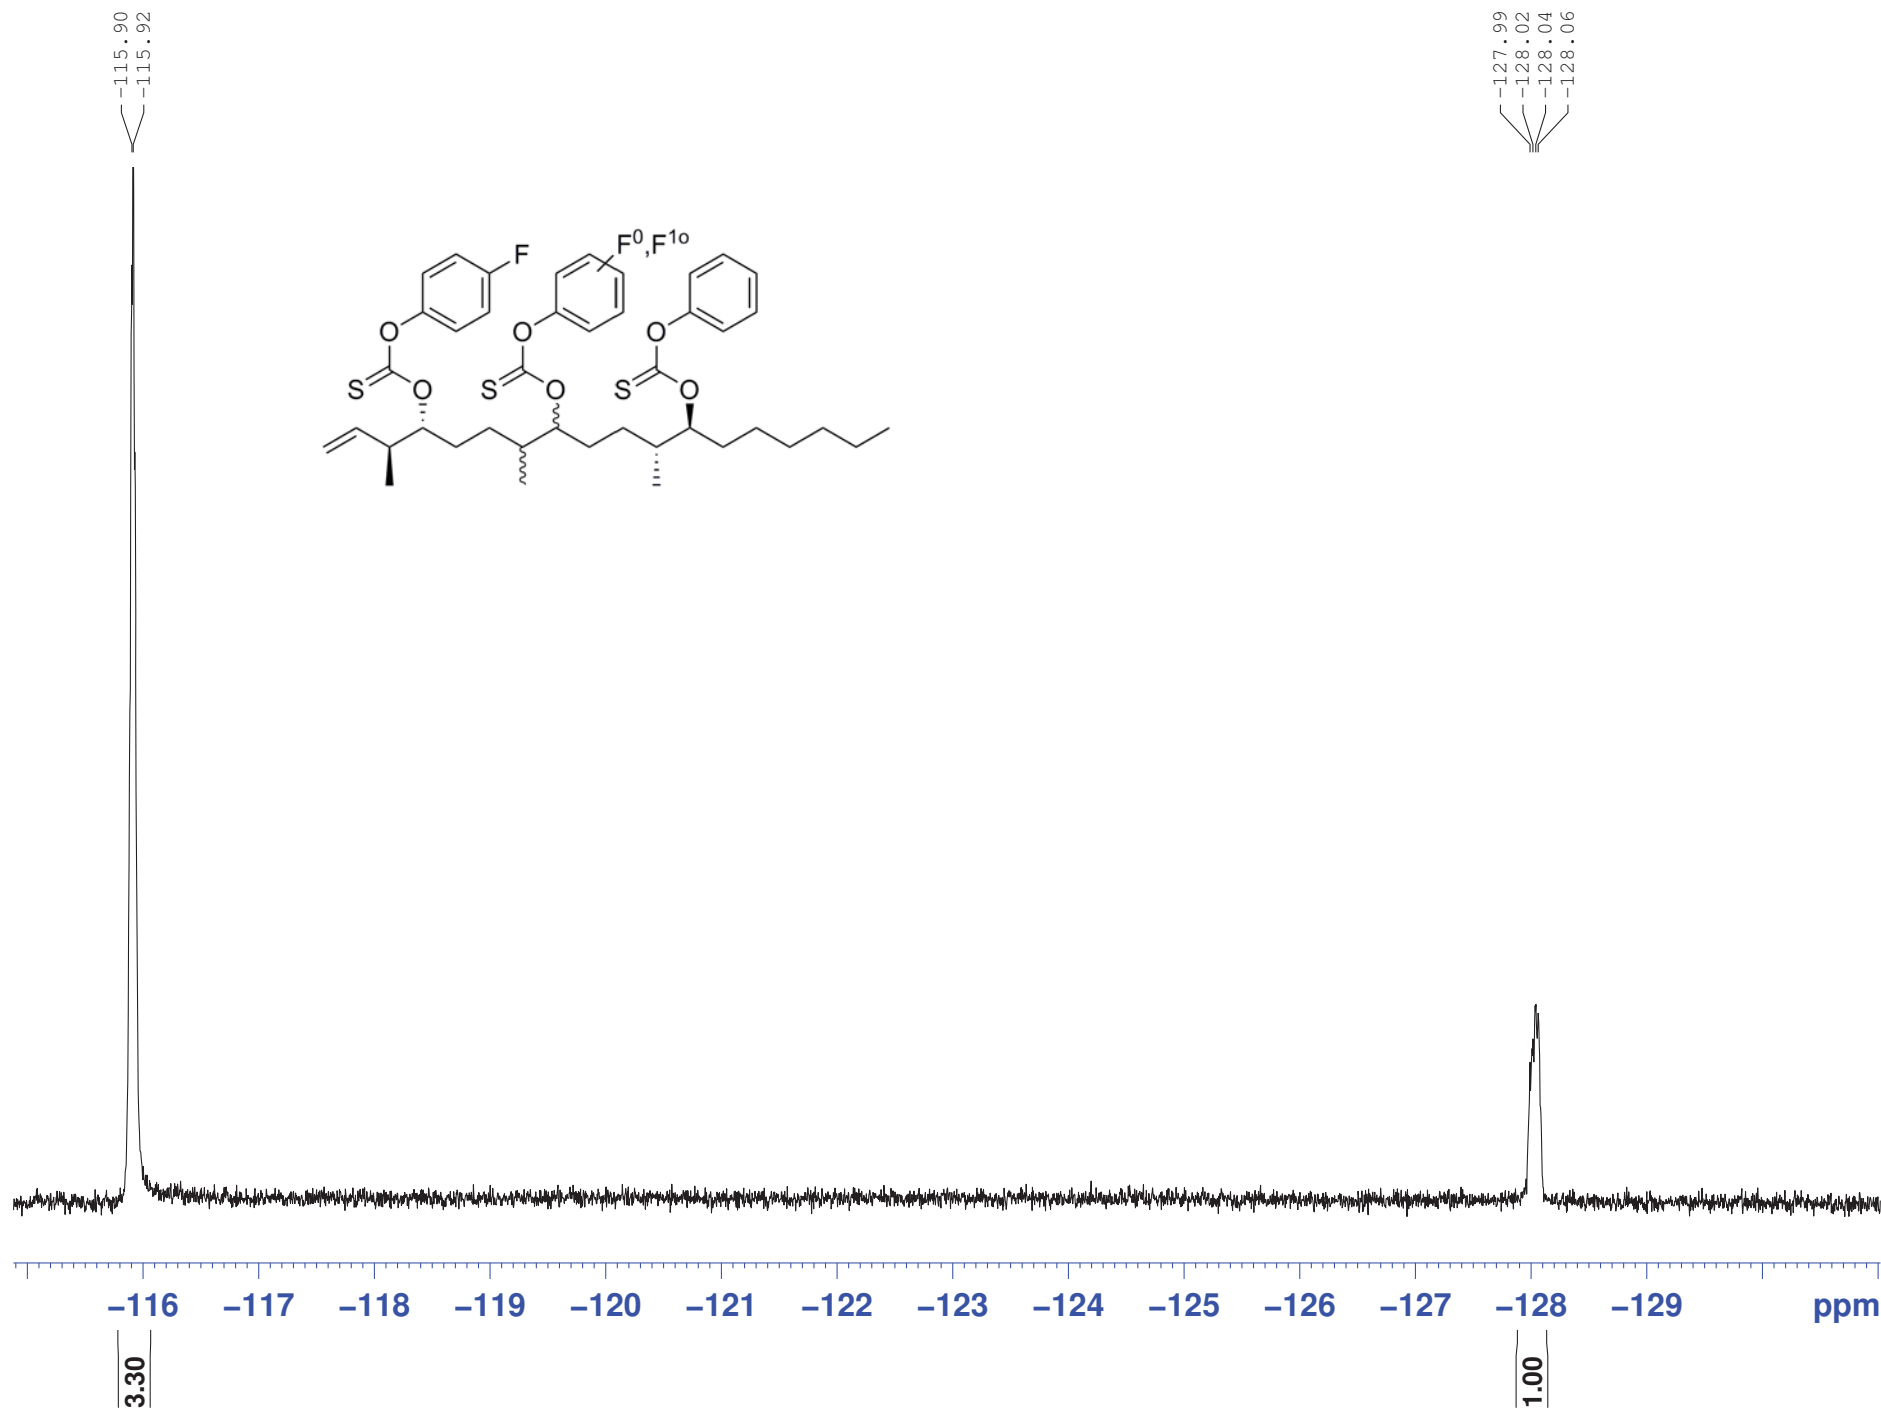

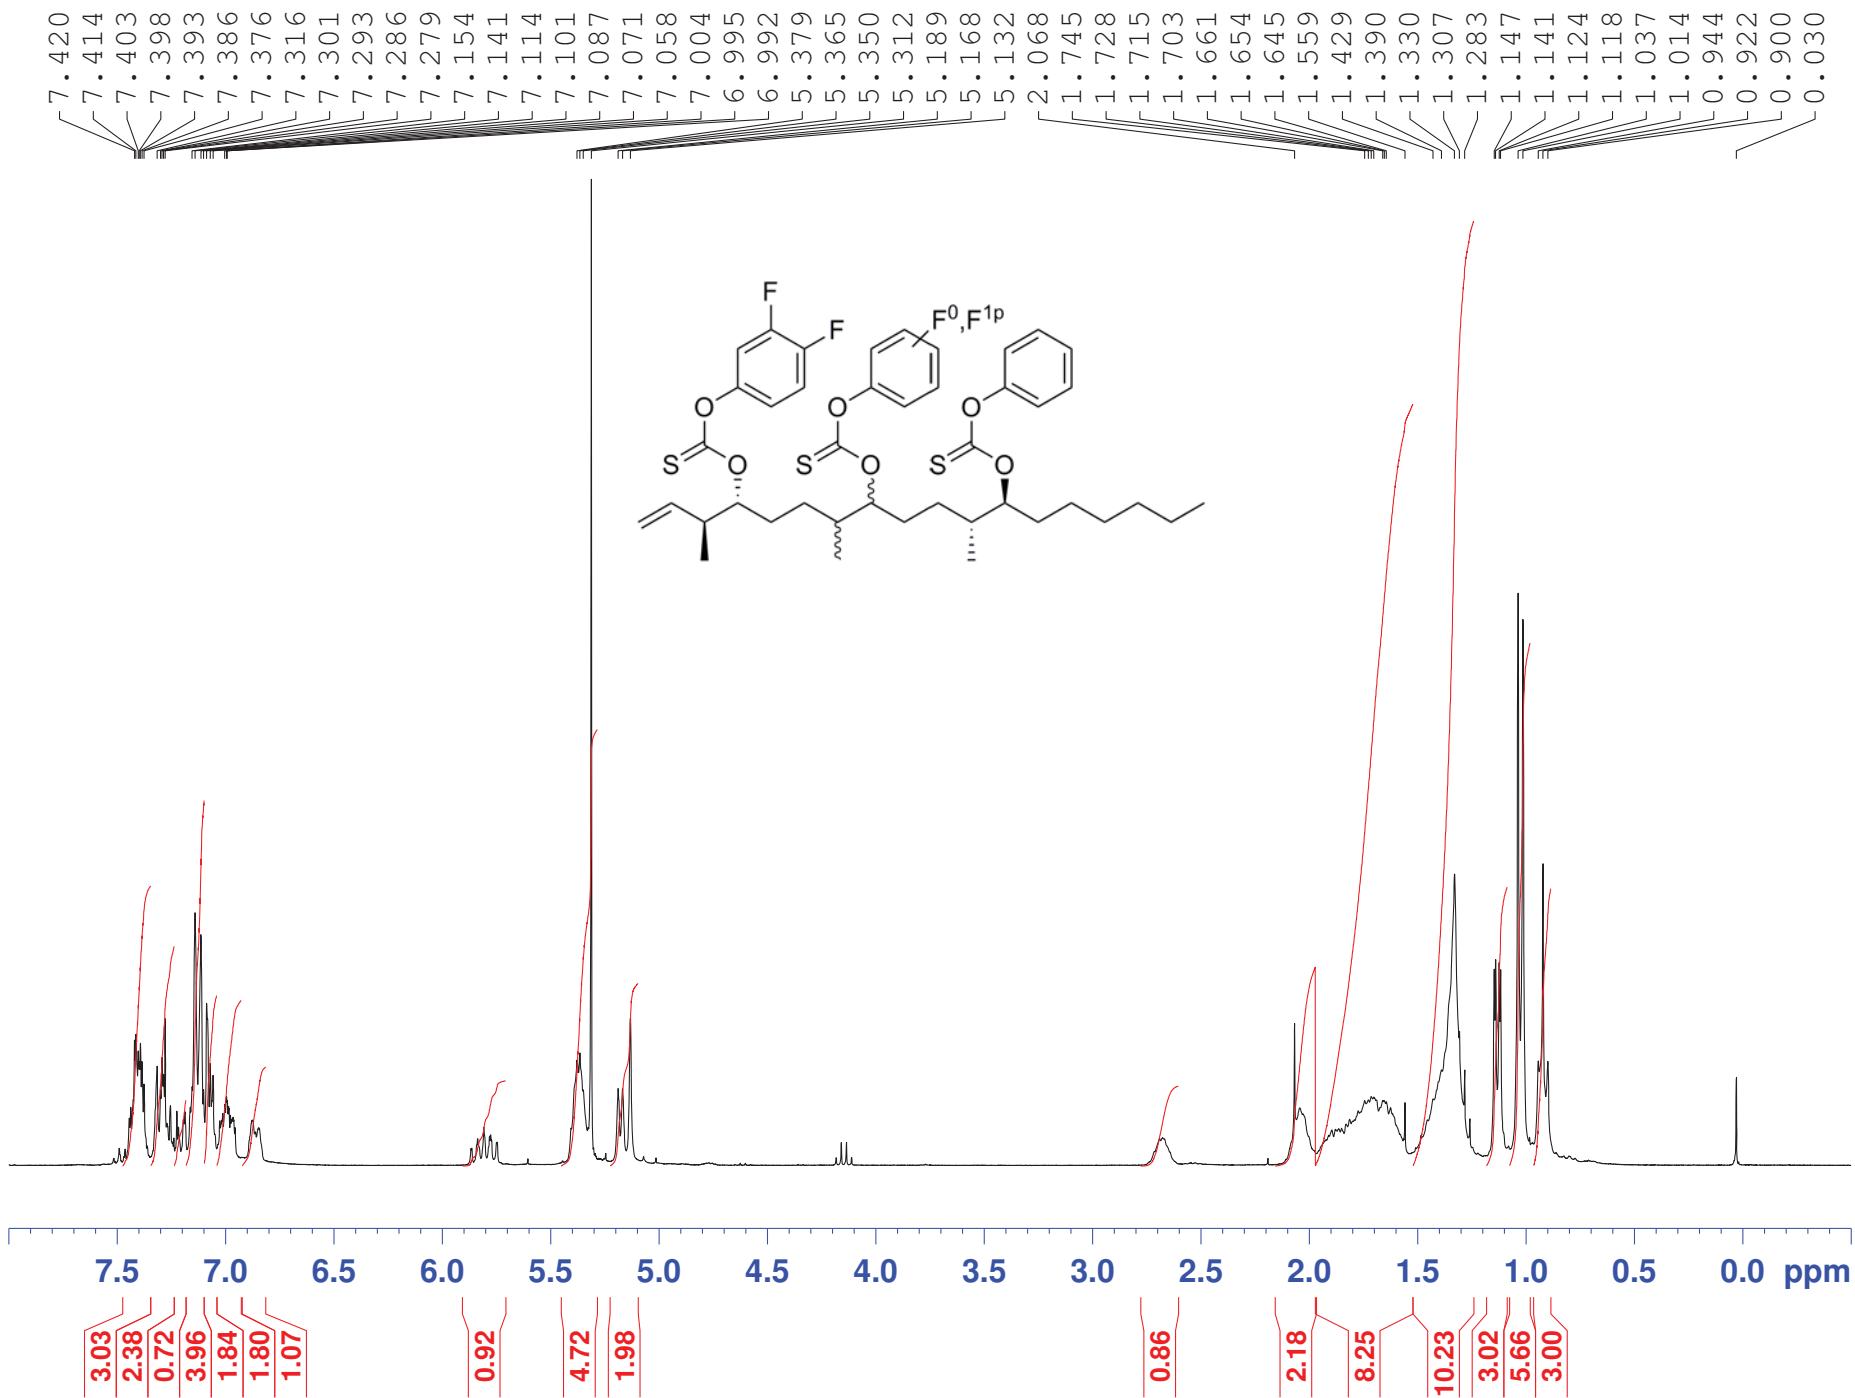

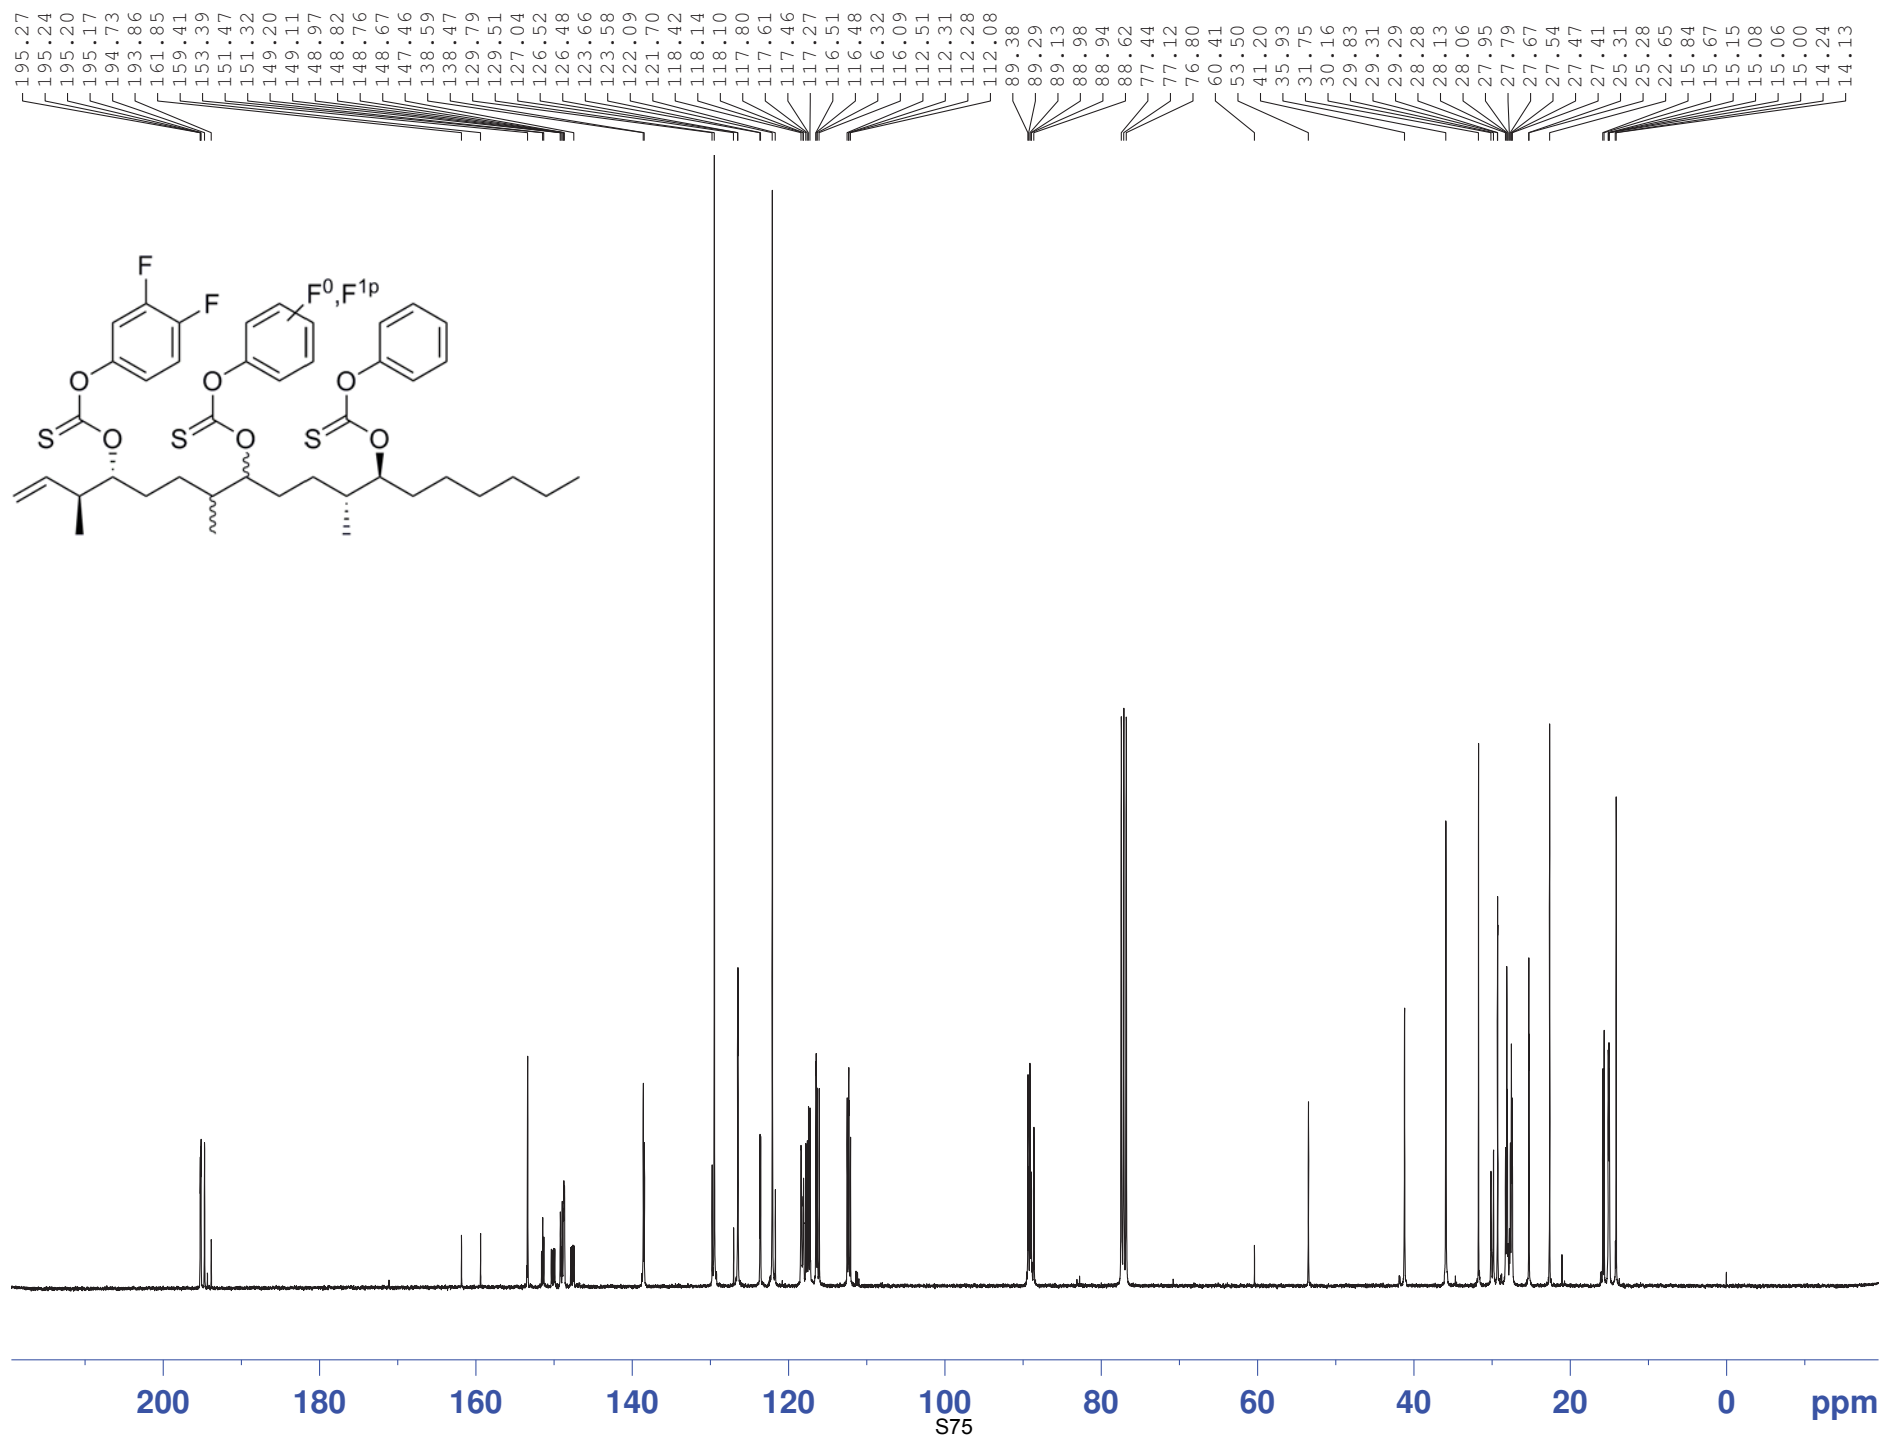



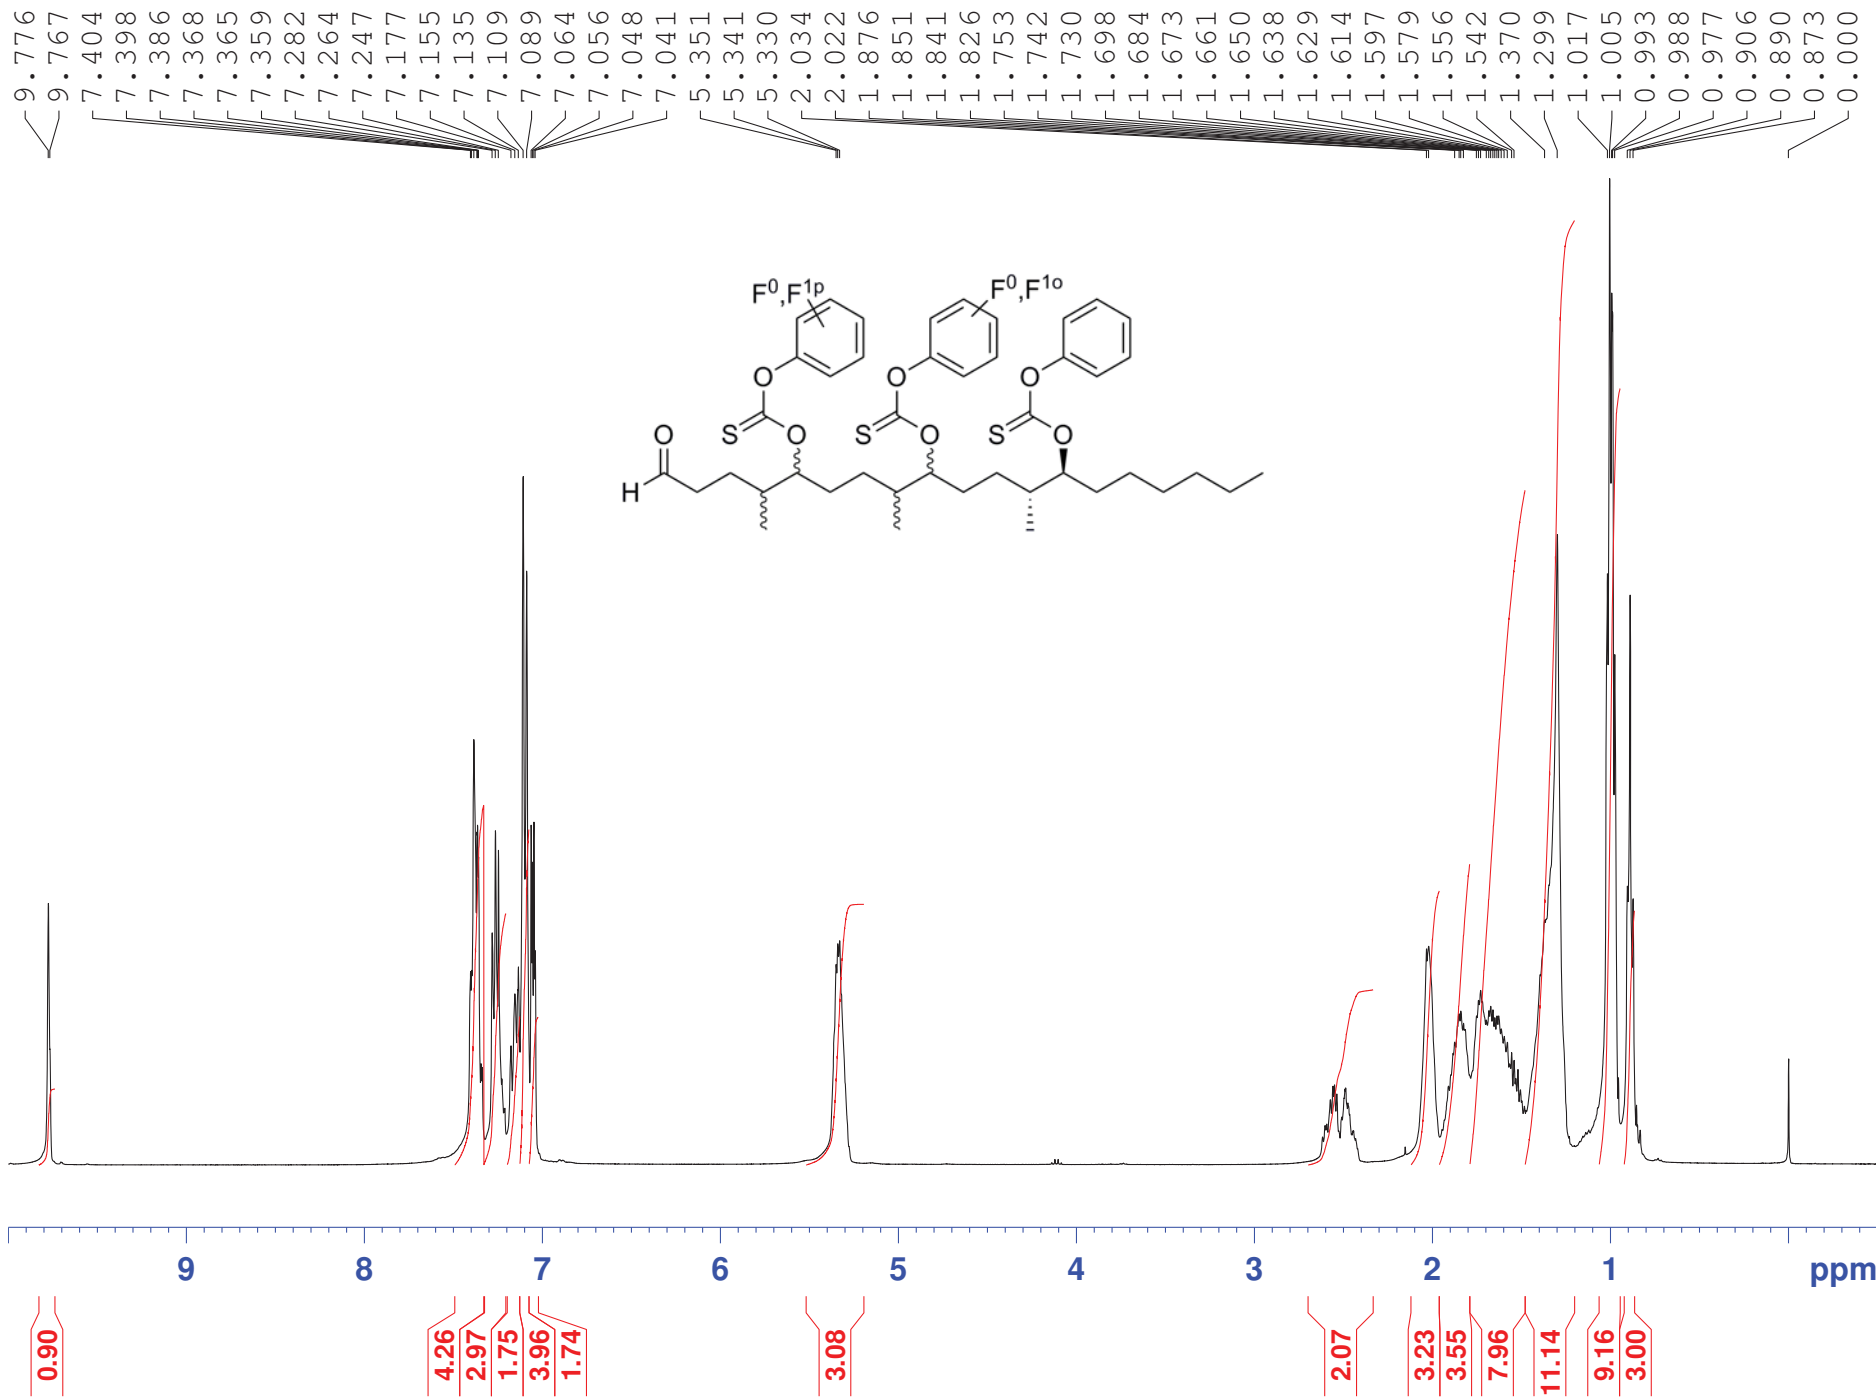

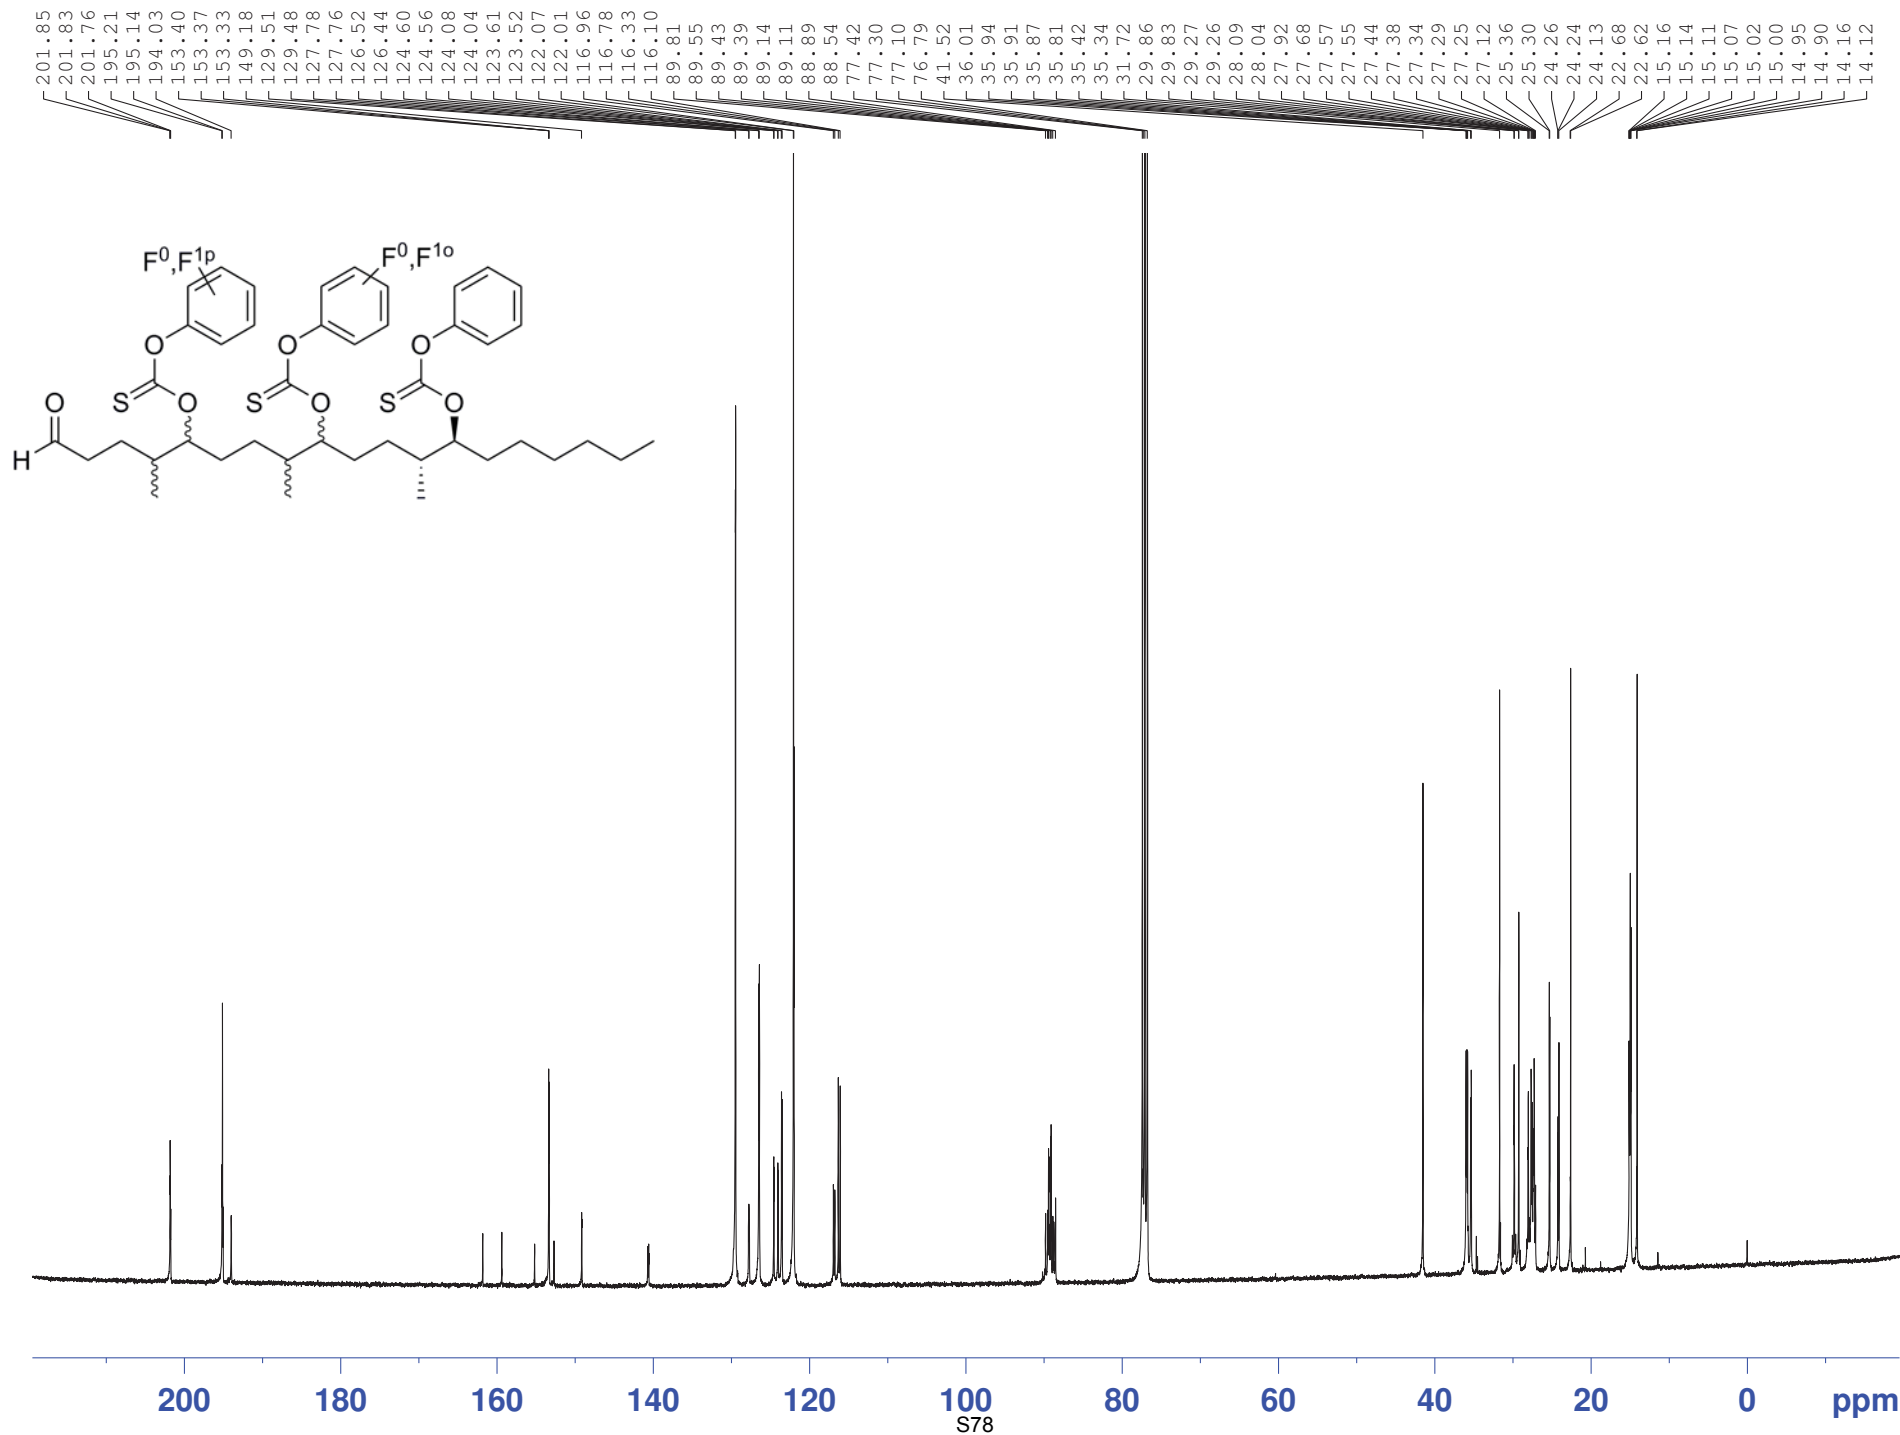

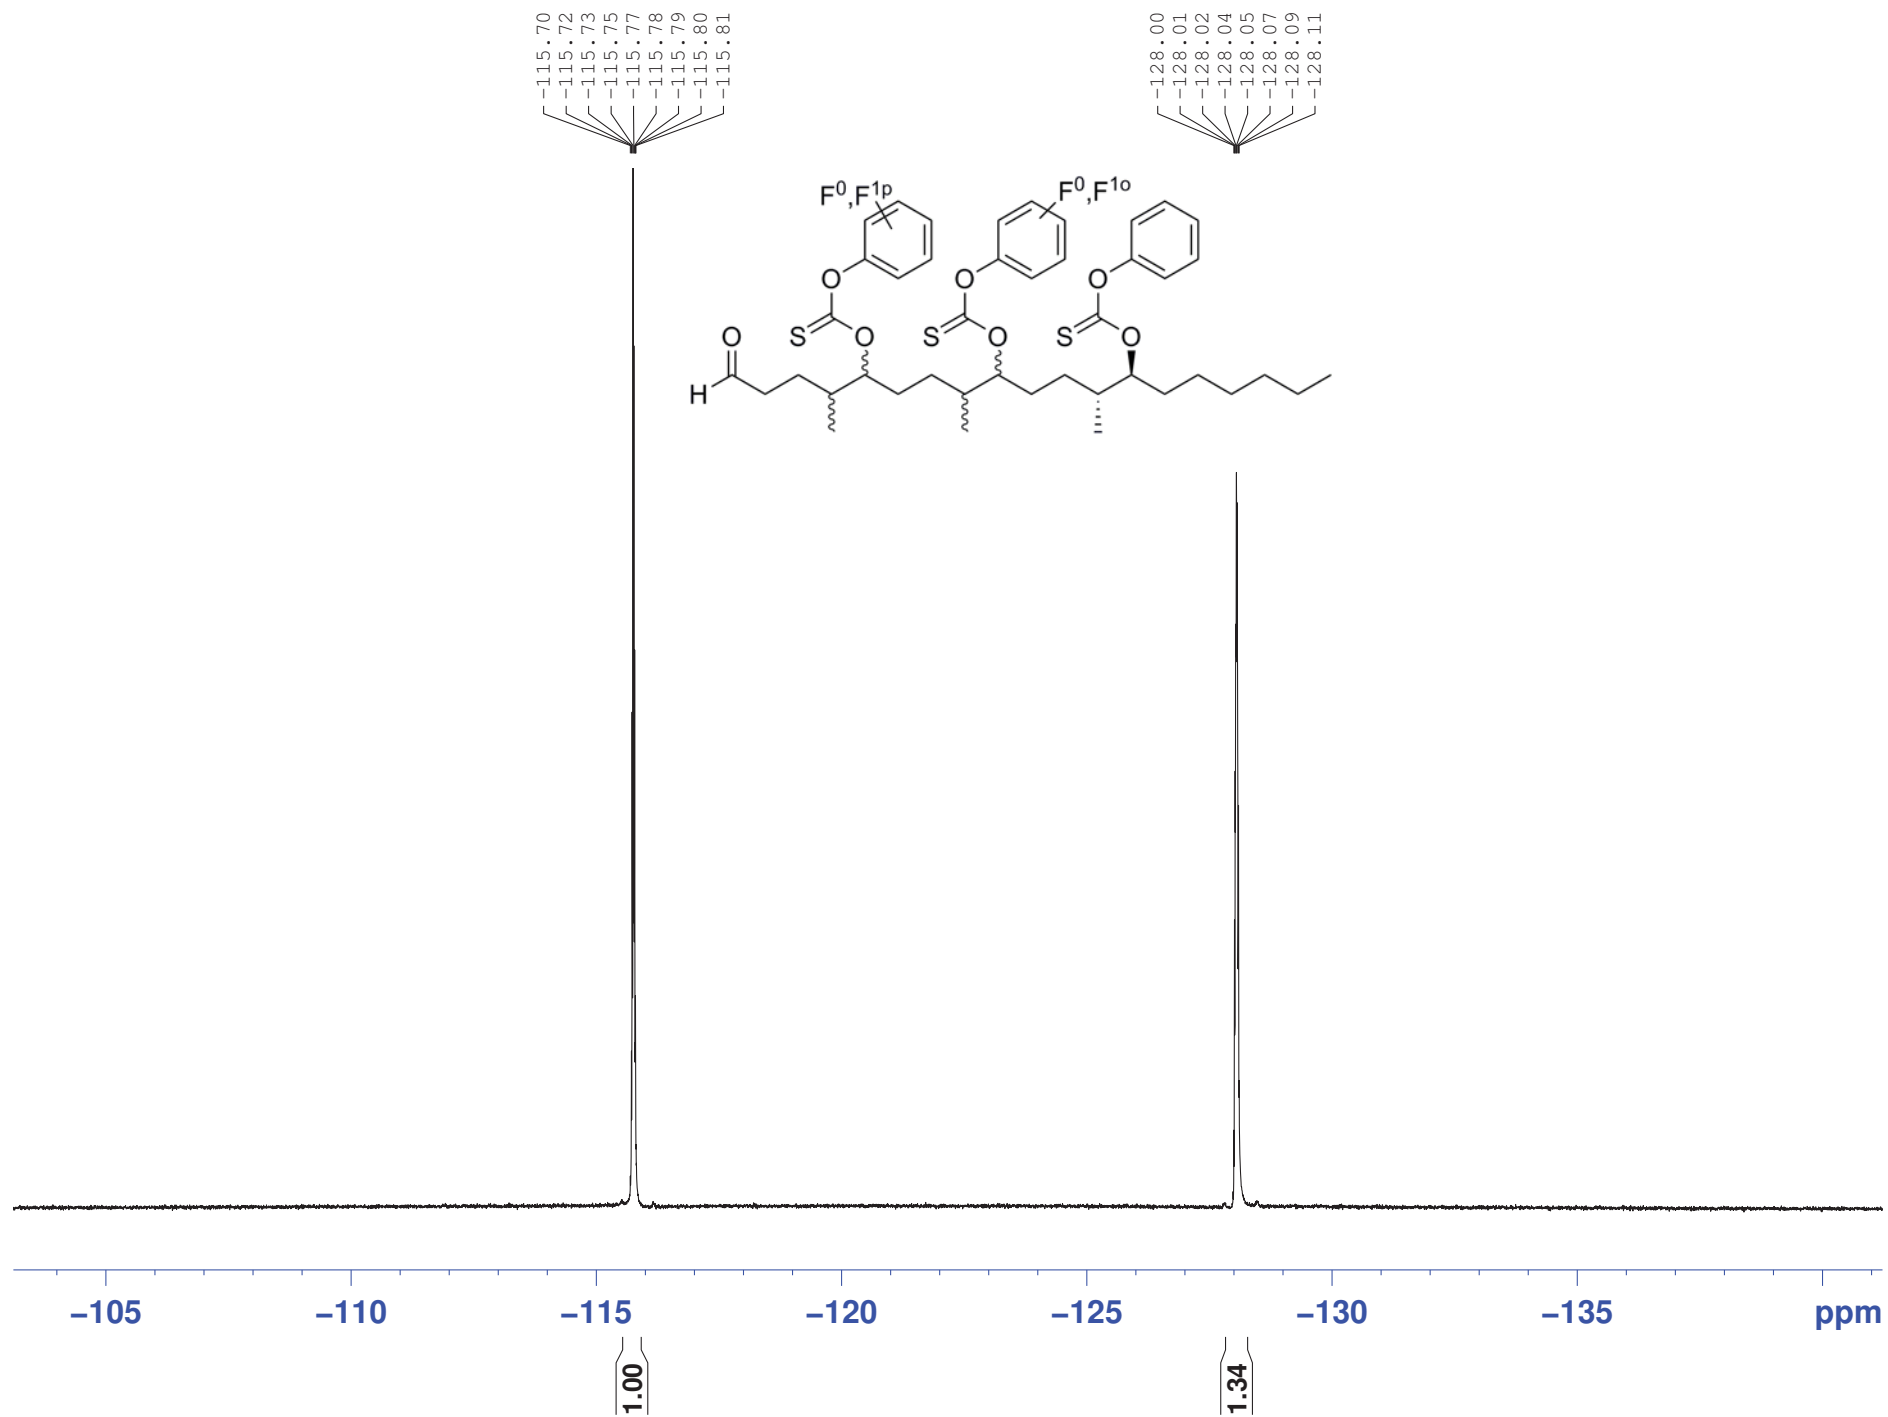

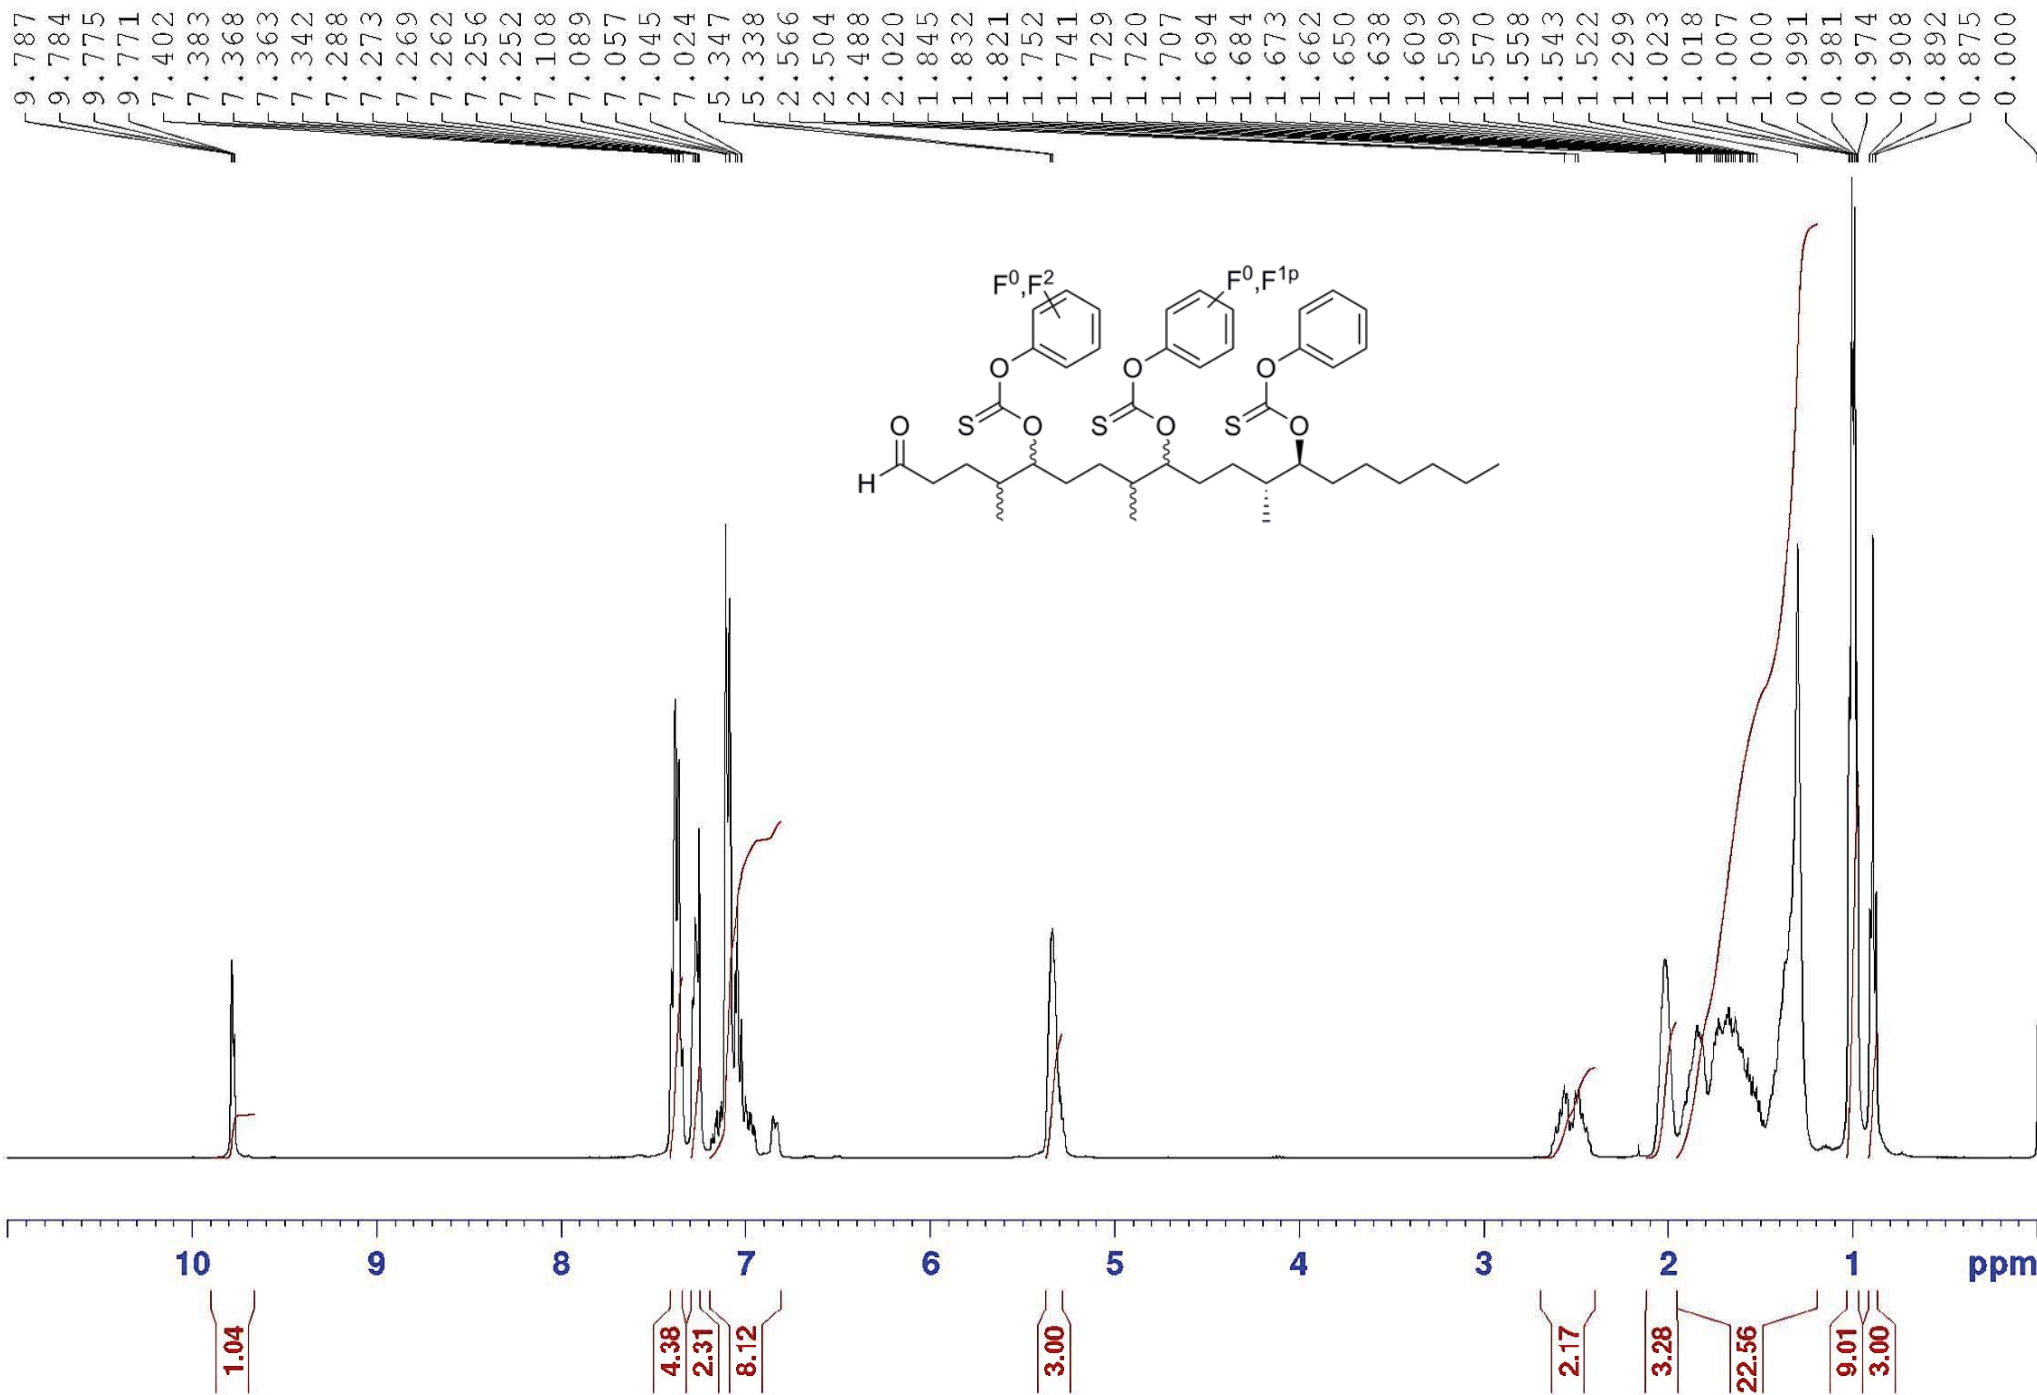



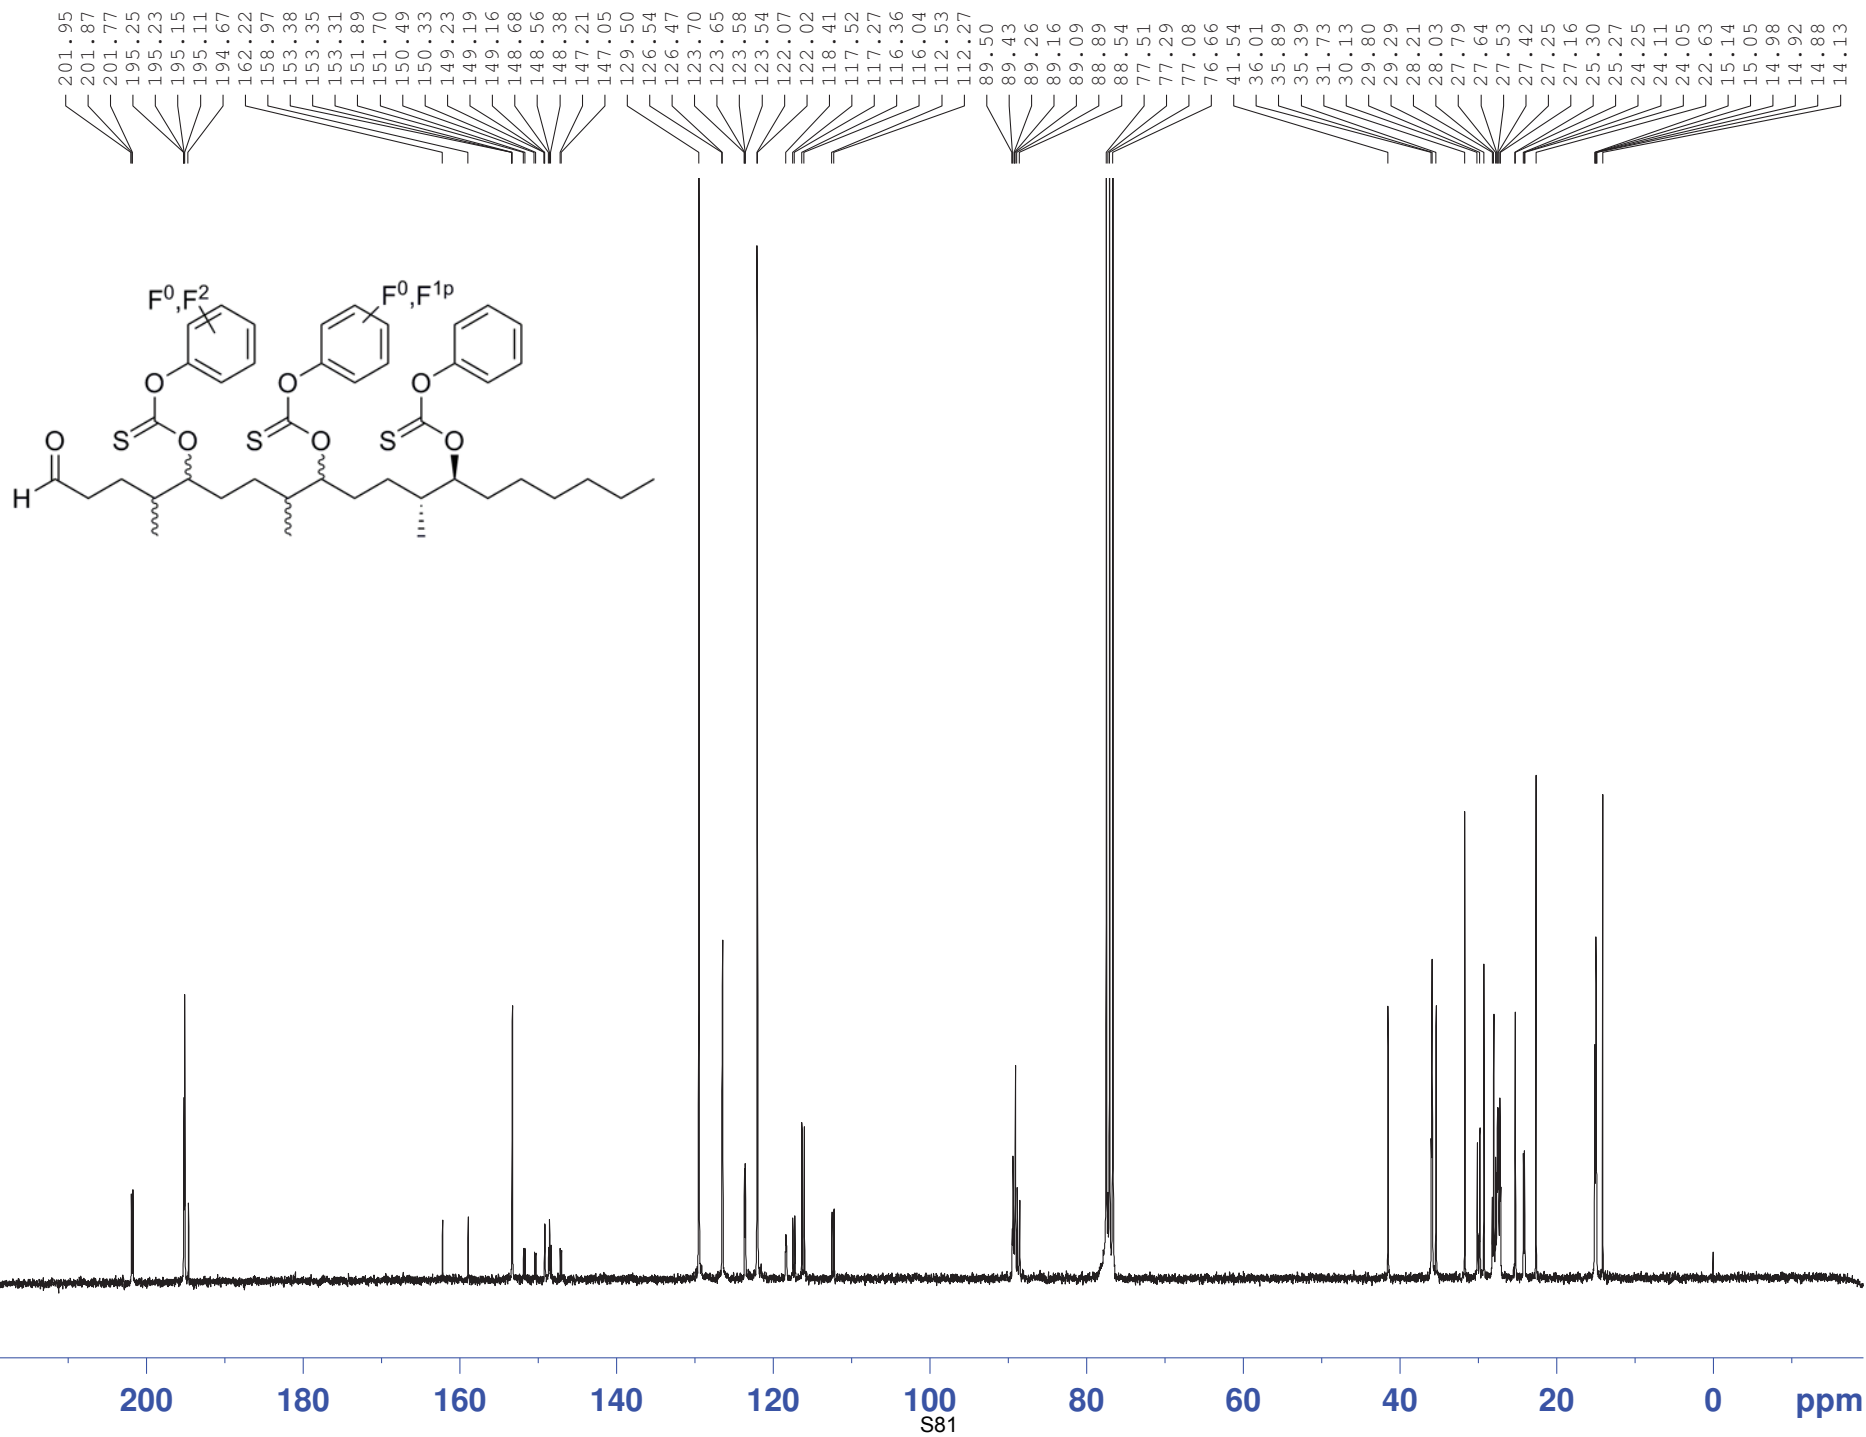

-115.70  
-115.71  
-115.73  
-115.74  
-115.76  
-115.80  
-115.82  
-115.84  
-115.86  
-115.87  
-115.89  
-115.89

-133.95  
-133.98  
-133.99  
-134.01  
-134.04  
-134.04  
-134.07  
-134.10  
-139.44  
-139.47  
-139.48  
-139.49  
-139.50  
-139.51  
-139.52  
-139.53  
-139.53  
-139.54  
-139.55  
-139.56  
-139.57  
-139.58  
-139.59  
-139.60  
-139.61  
-139.62  
-139.63  
-139.65  
-139.67

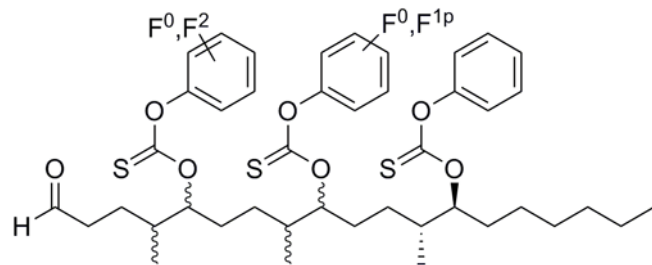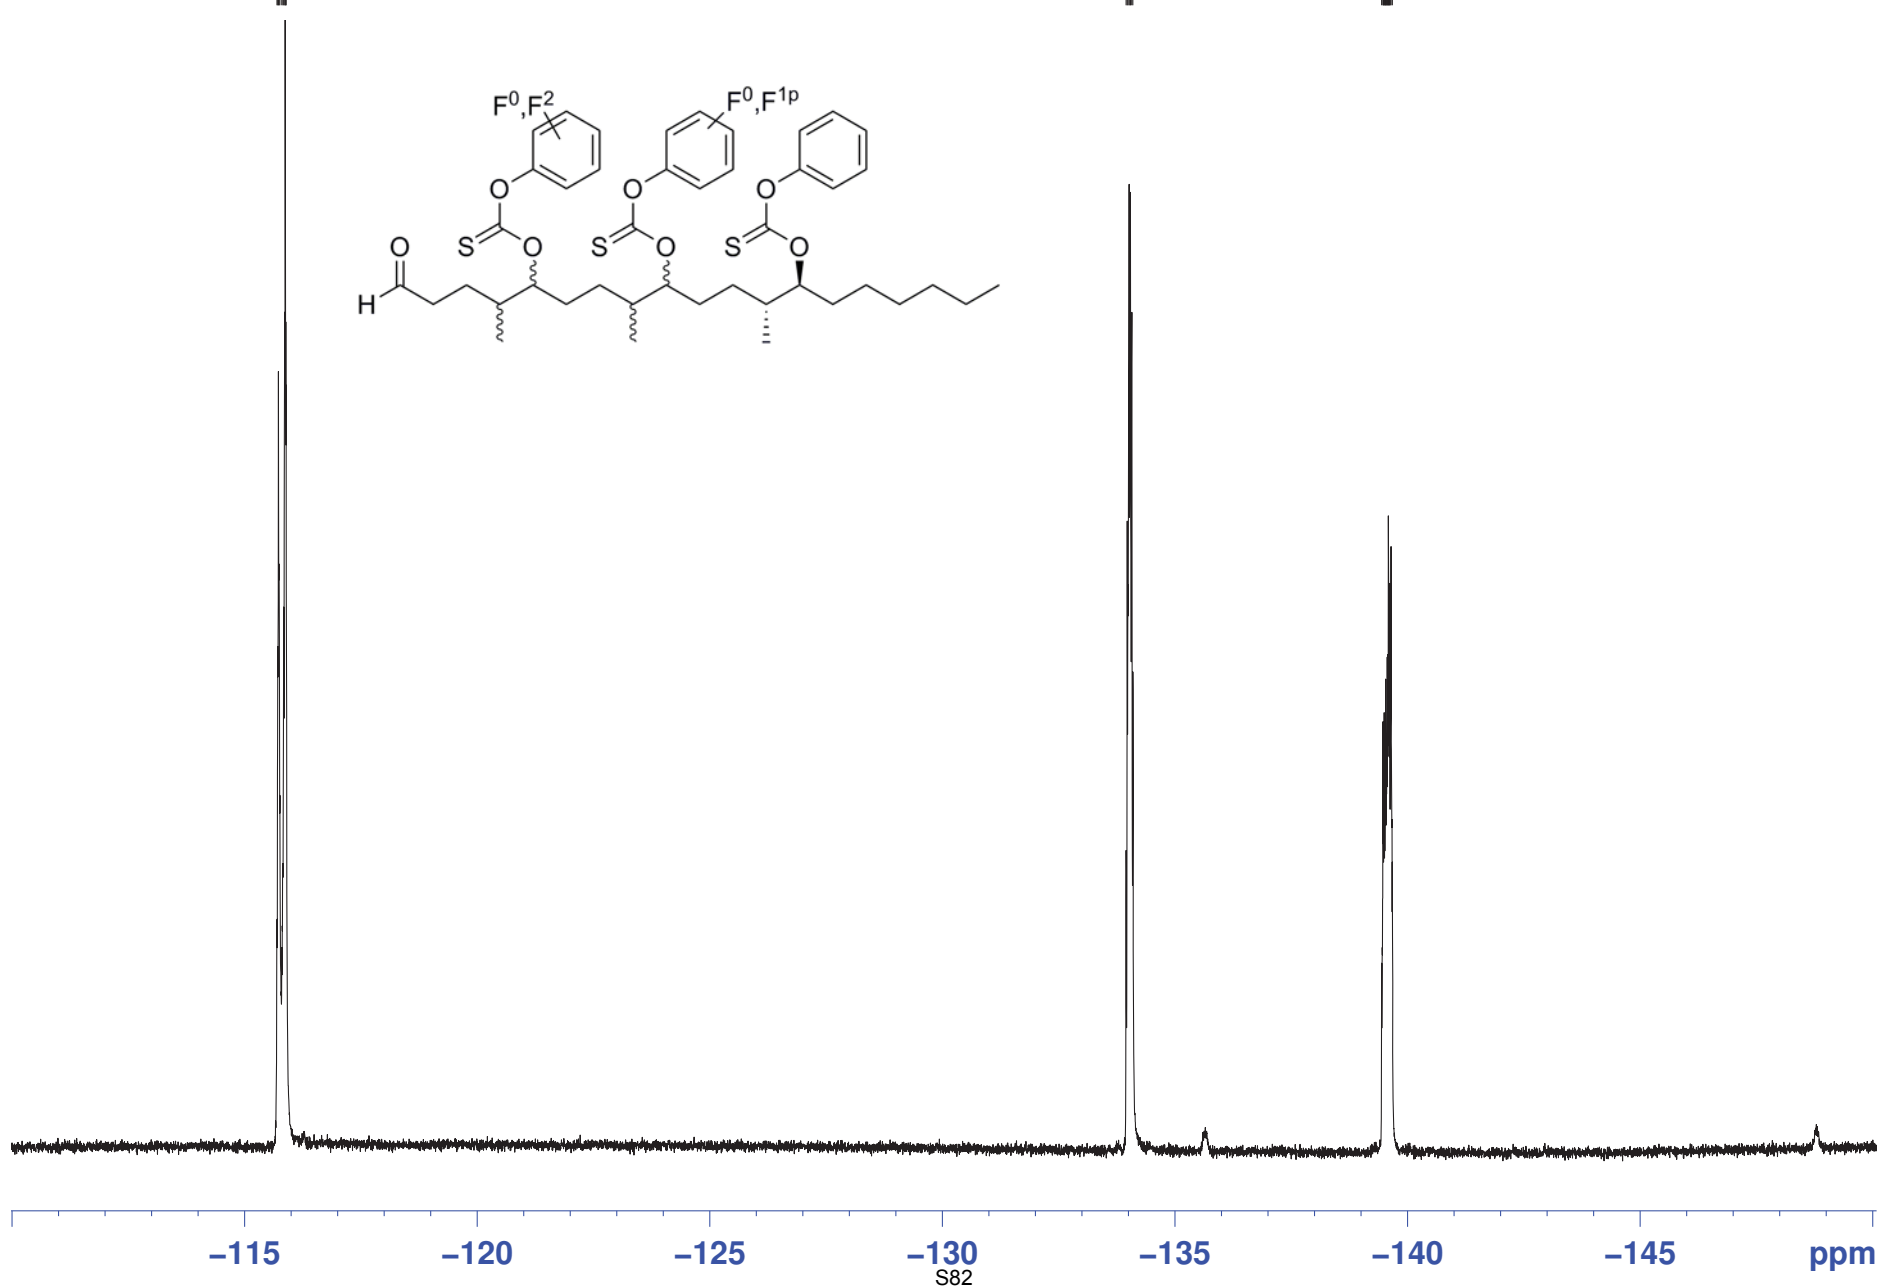

-115

-120

-125

-130  
S82

-135

-140

-145

ppm

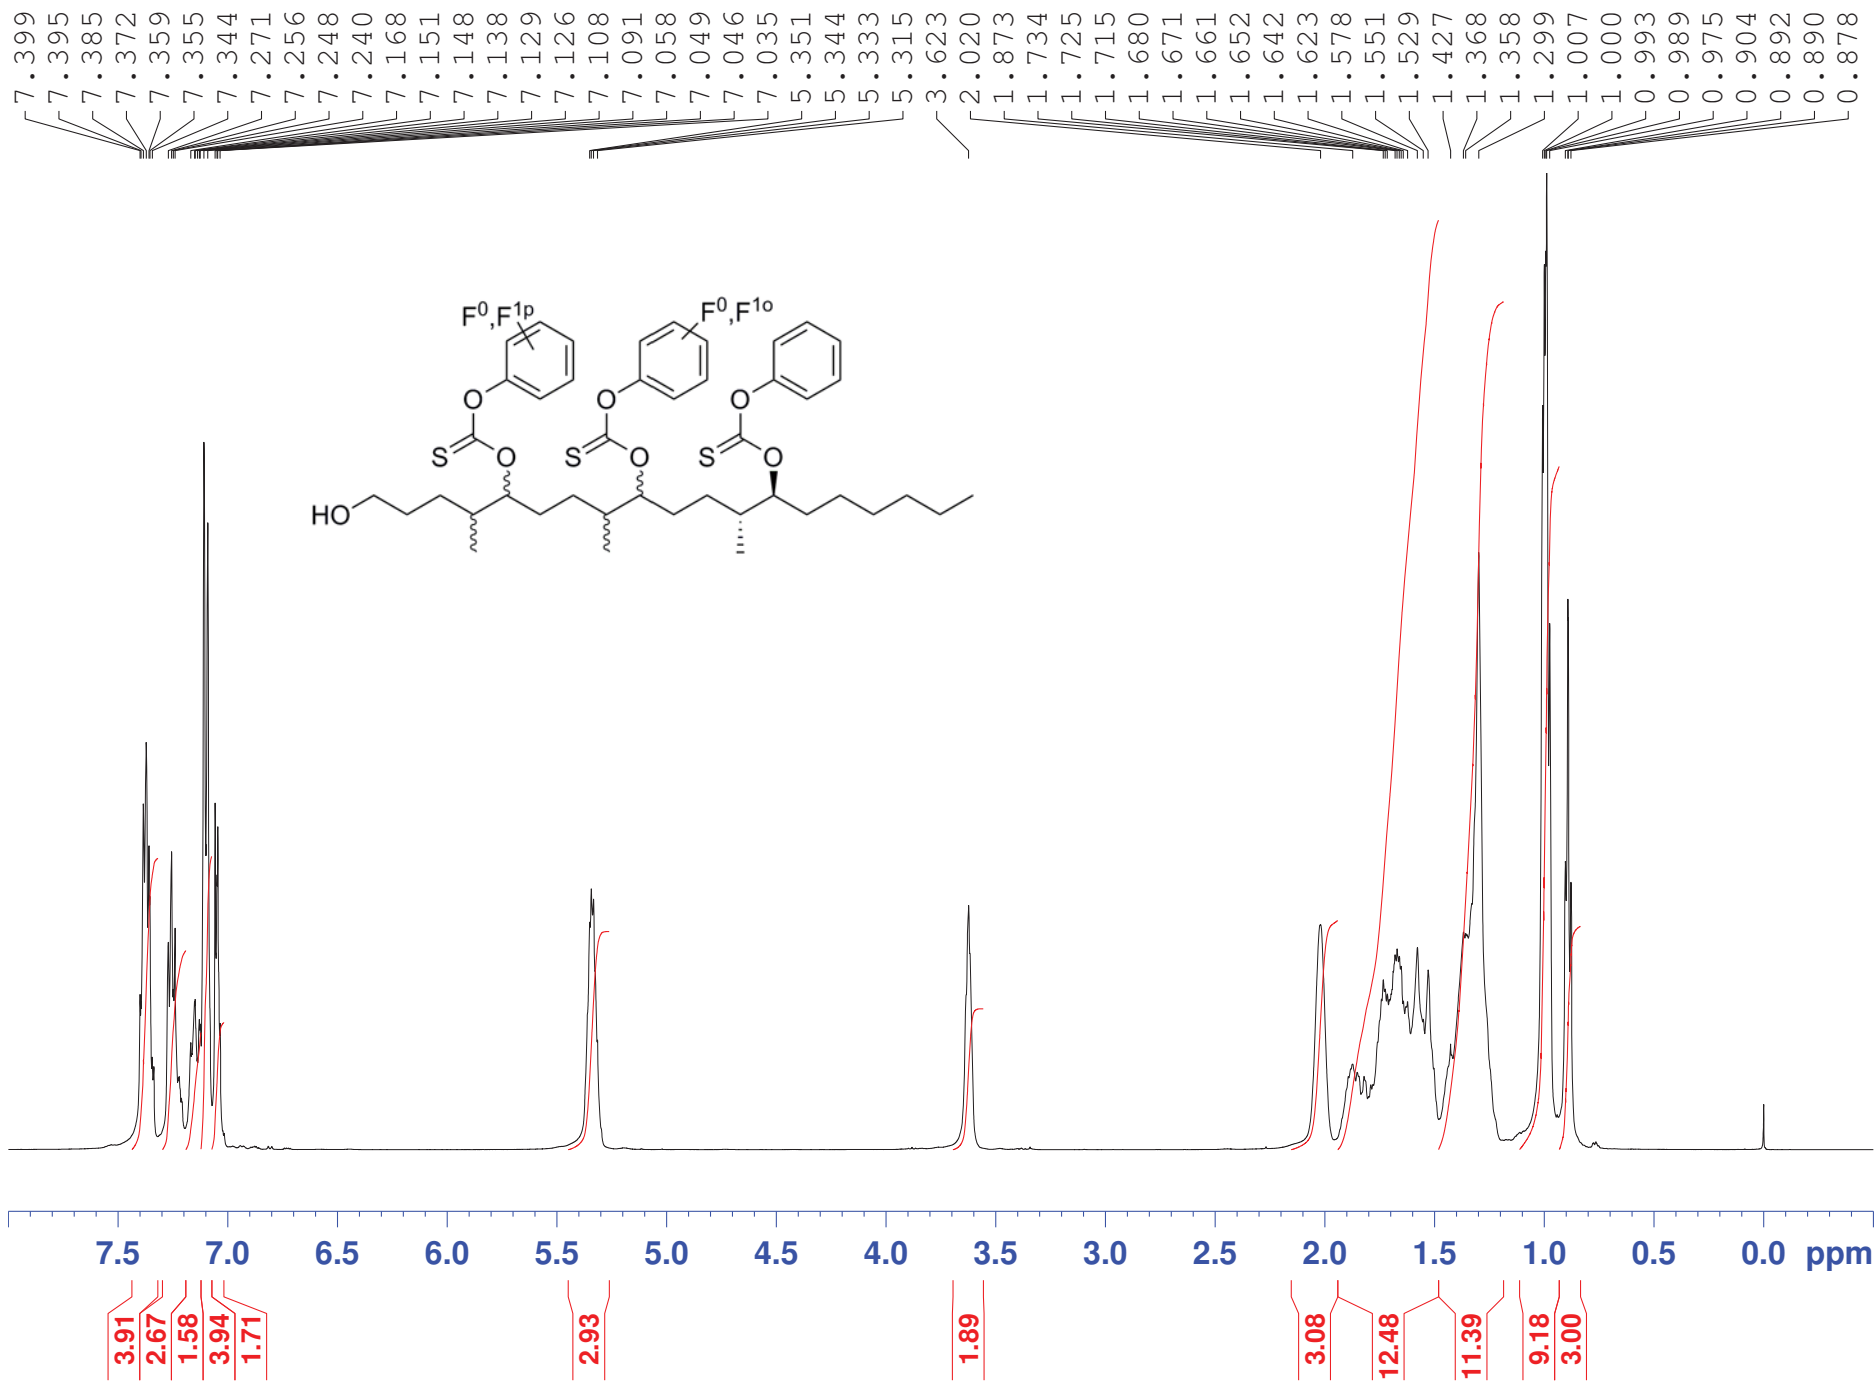

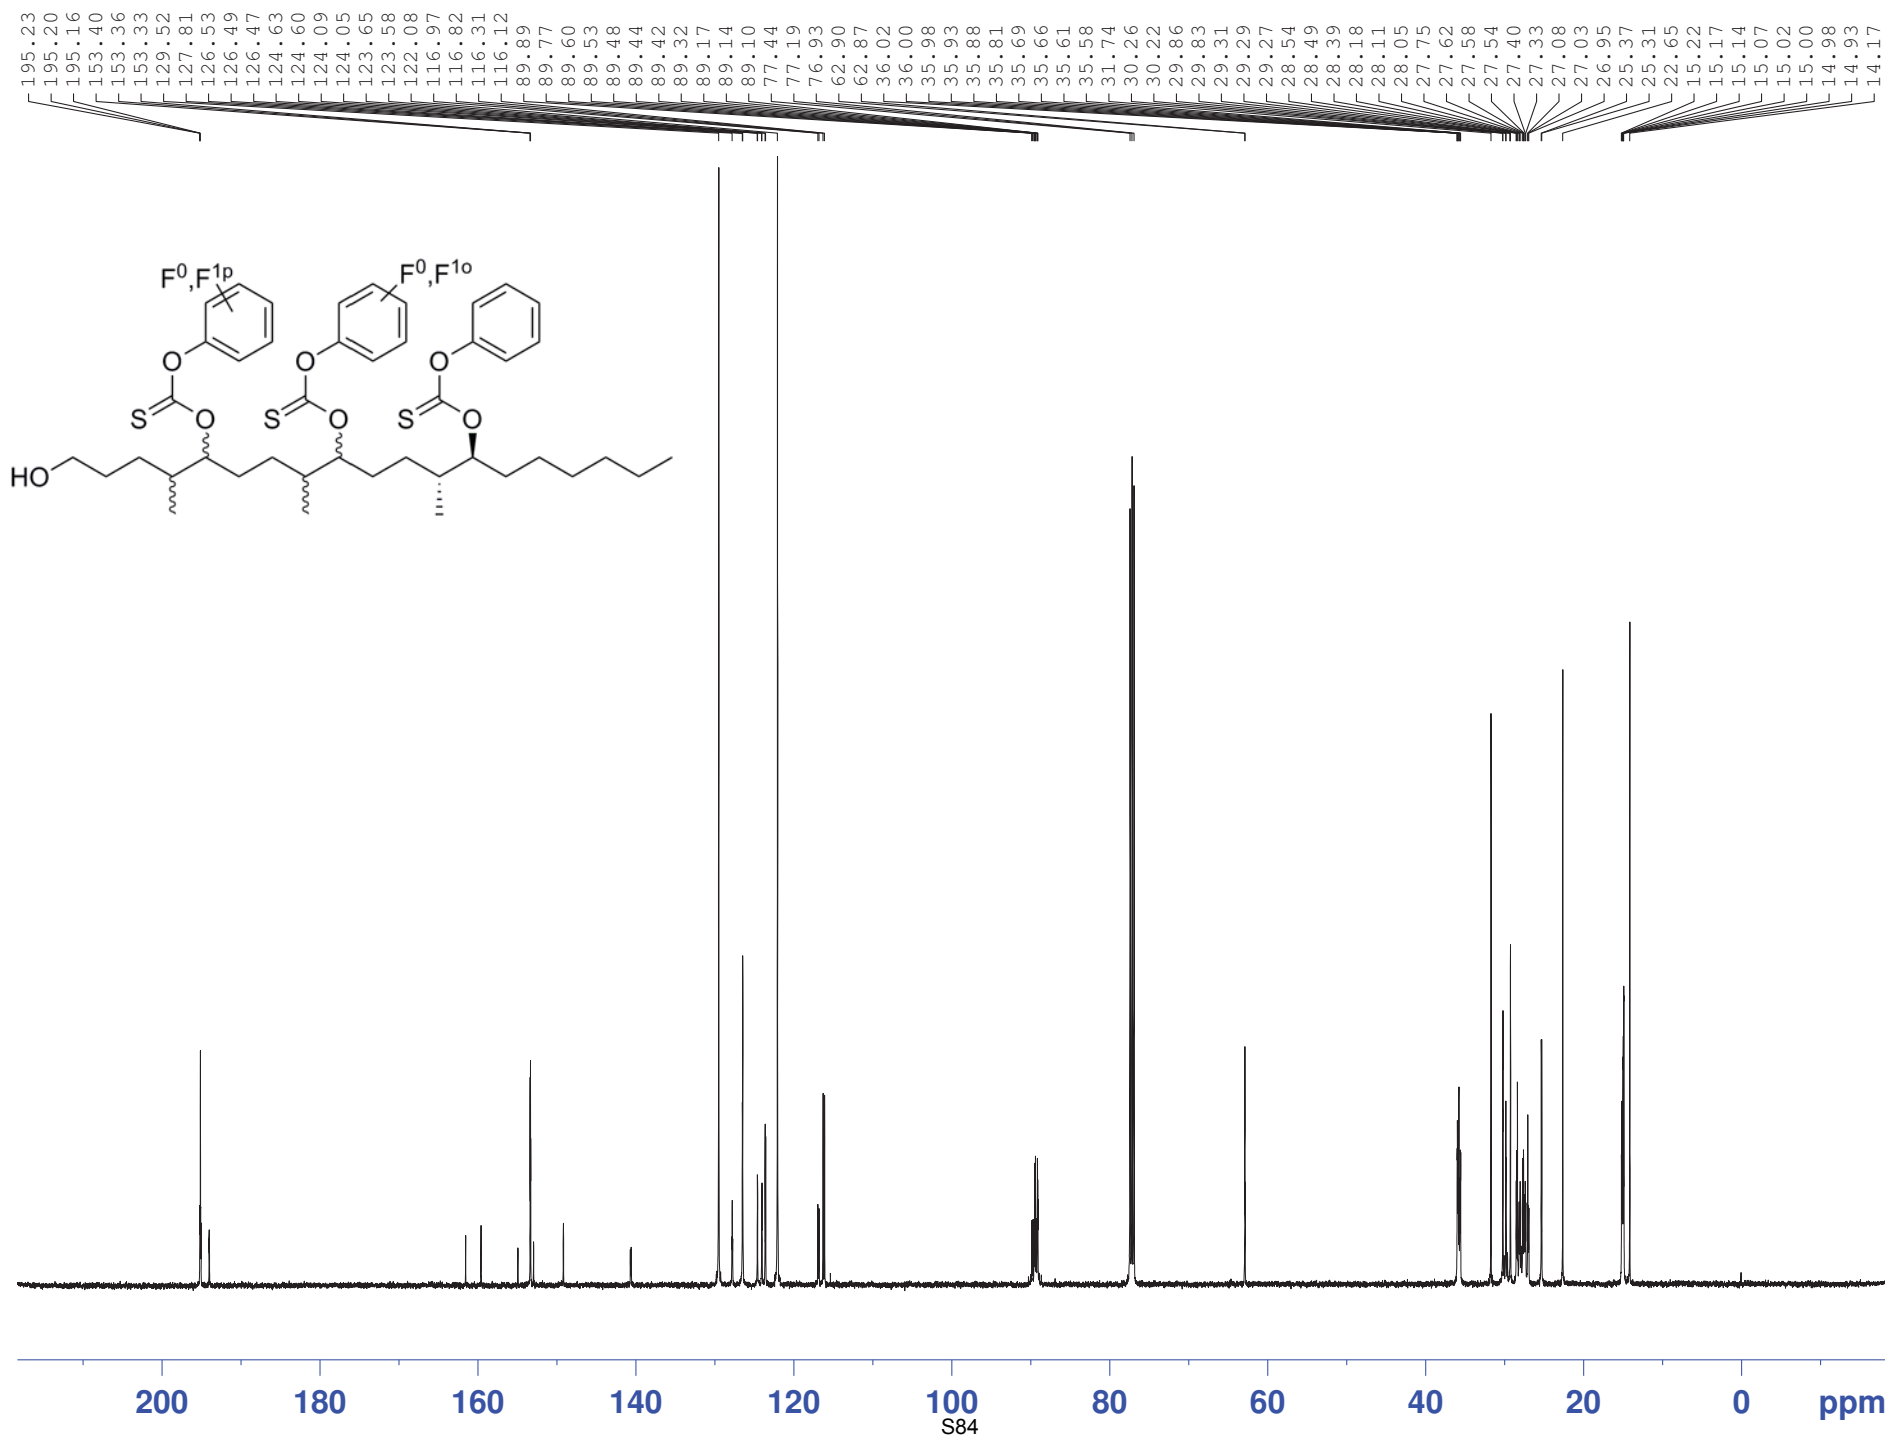

-115.88  
-115.89

-128.03

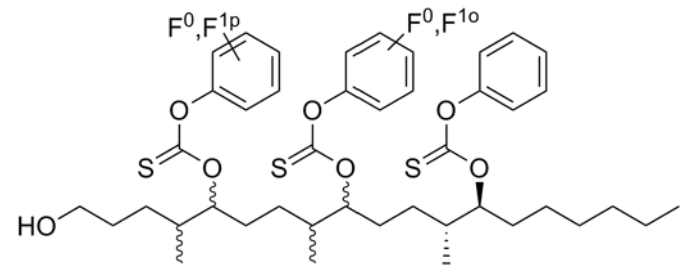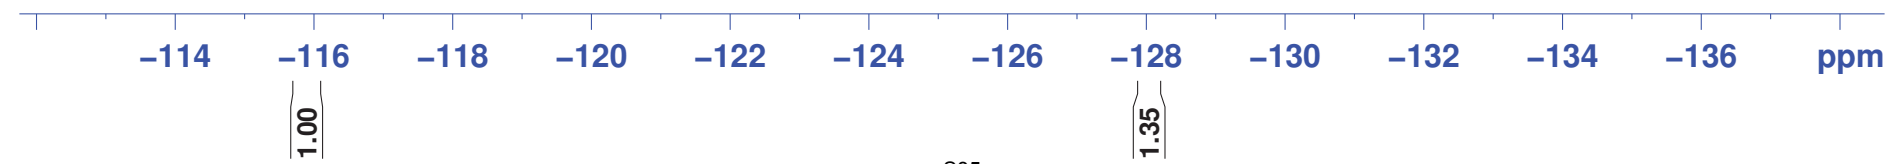

7.411  
7.392  
7.313  
7.295  
7.283  
7.138  
7.119  
7.086  
7.075  
7.054  
7.032

5.367  
5.312

3.672

2.069  
2.049  
1.910  
1.883  
1.846  
1.715  
1.706  
1.690  
1.679  
1.669  
1.654  
1.613  
1.600  
1.592  
1.569  
1.410  
1.330  
1.284  
1.266  
1.029  
1.023  
0.922  
0.905  
0.030

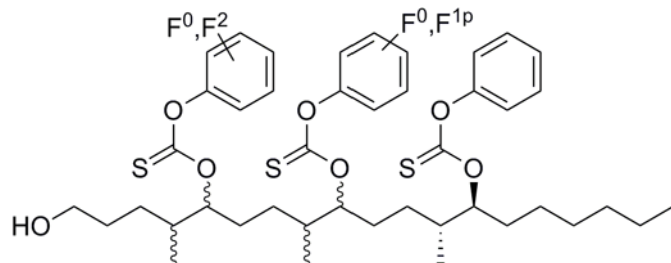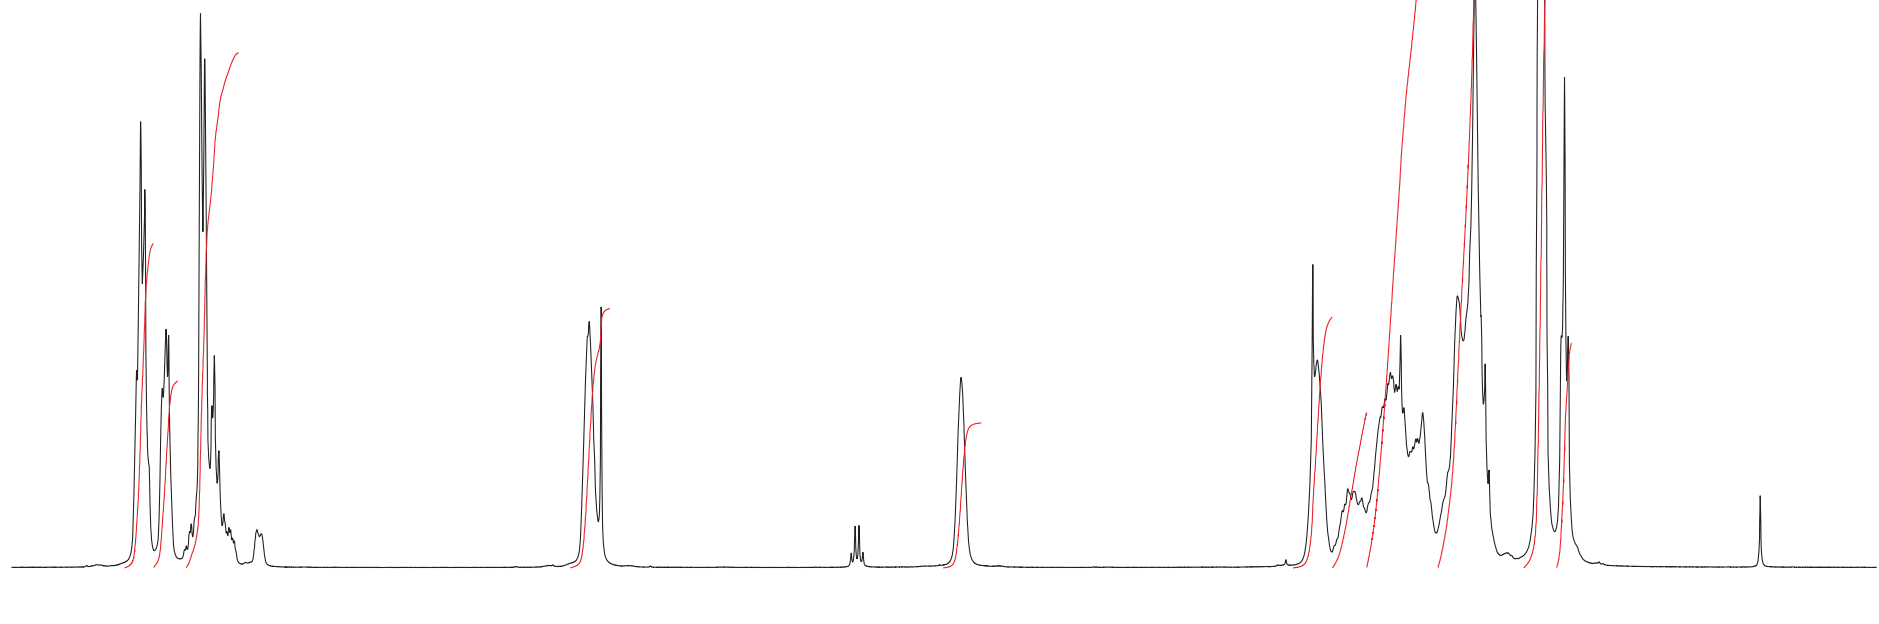

4.33  
2.49  
6.88

3.46

1.94

3.35  
2.08  
9.71  
12.63  
8.95  
3.00



-115.70  
-115.73  
-115.75  
-115.77  
-115.78  
-115.81  
-115.82  
-115.83  
-115.84  
-115.85  
-115.86  
-115.87  
-115.88  
-115.89  
-115.90  
-115.91

-134.03  
-134.06  
-134.08  
-134.10  
-134.11  
-134.13  
-134.16  
-134.18  
-139.55  
-139.56  
-139.57  
-139.58  
-139.59  
-139.60  
-139.61  
-139.62  
-139.64  
-139.64  
-139.65  
-139.66  
-139.67  
-139.68  
-139.69  
-139.70

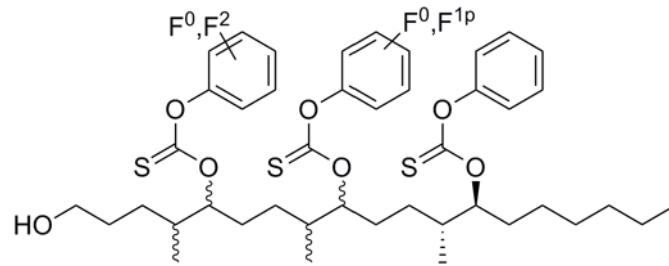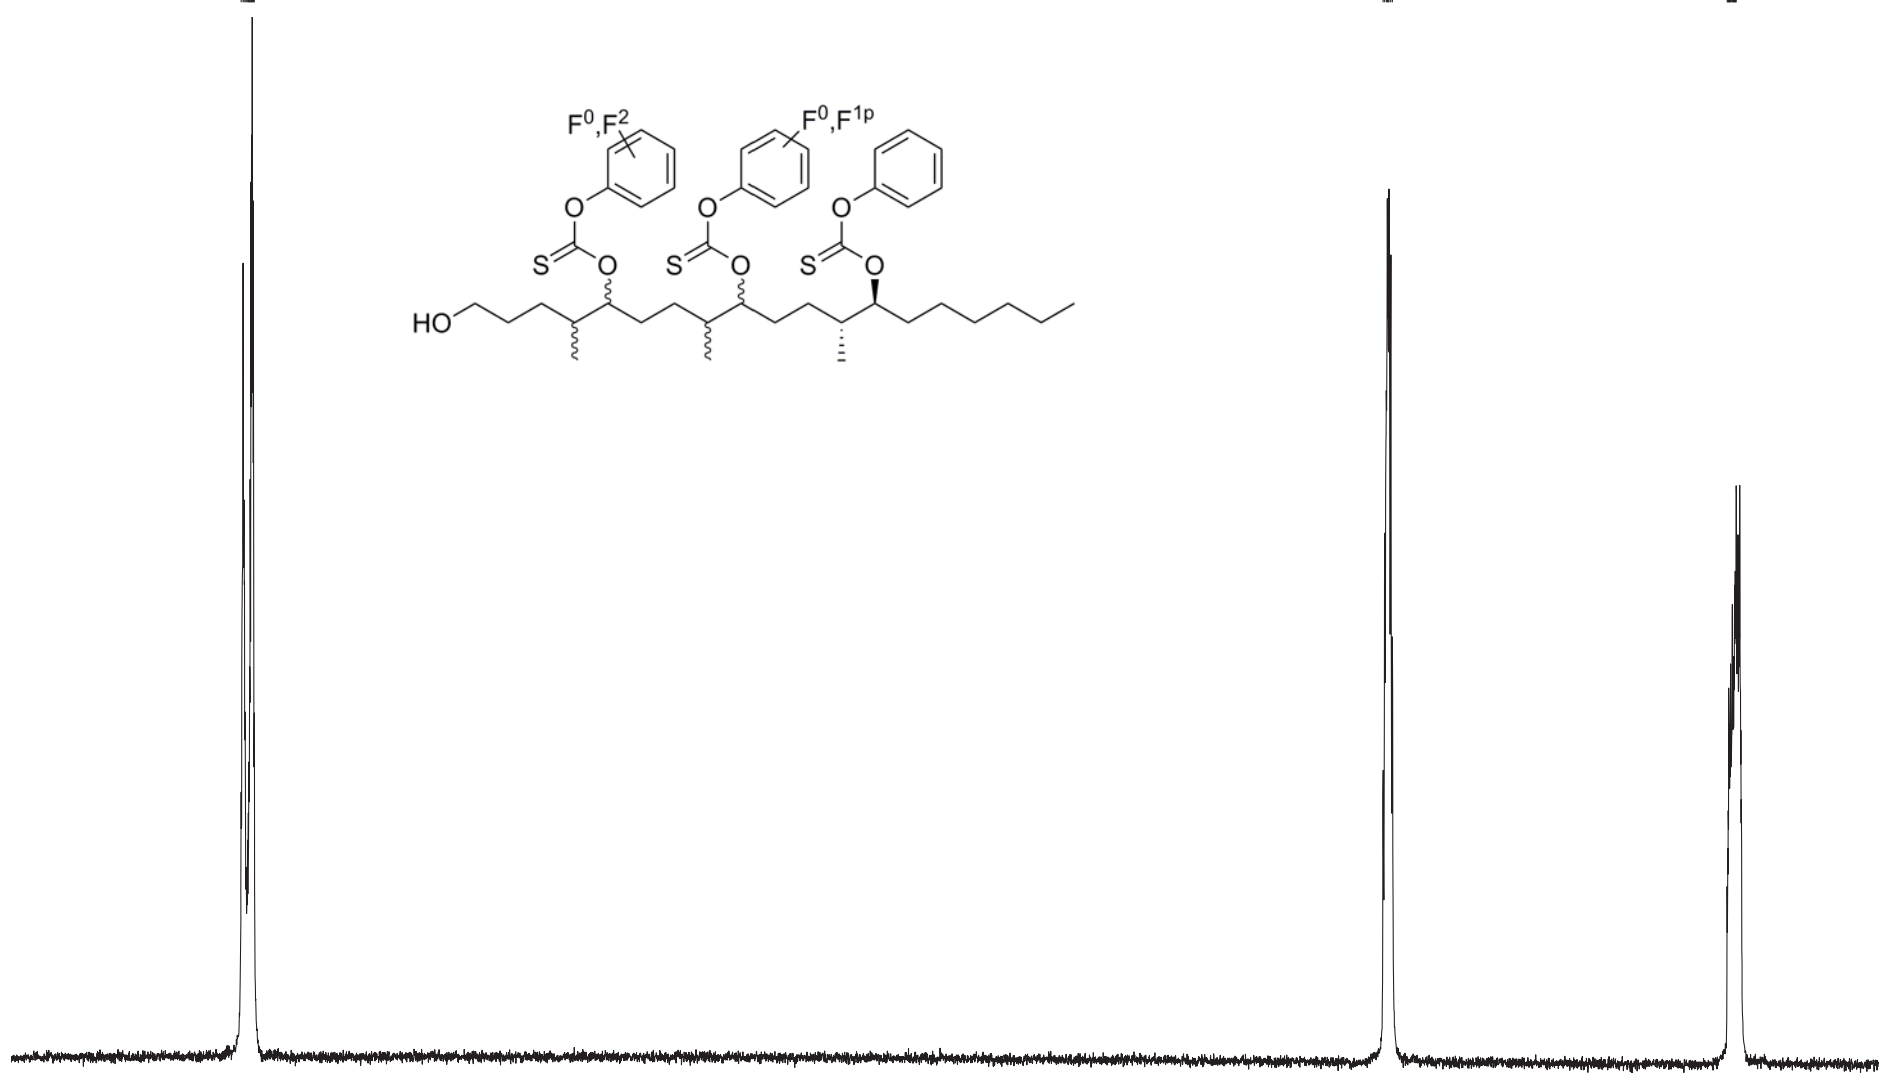

-114 -116 -118 -120 -122 -124 -126 -128 -130 -132 -134 -136 -138 -140 ppm

1.00  
1.63

2.12

1.84



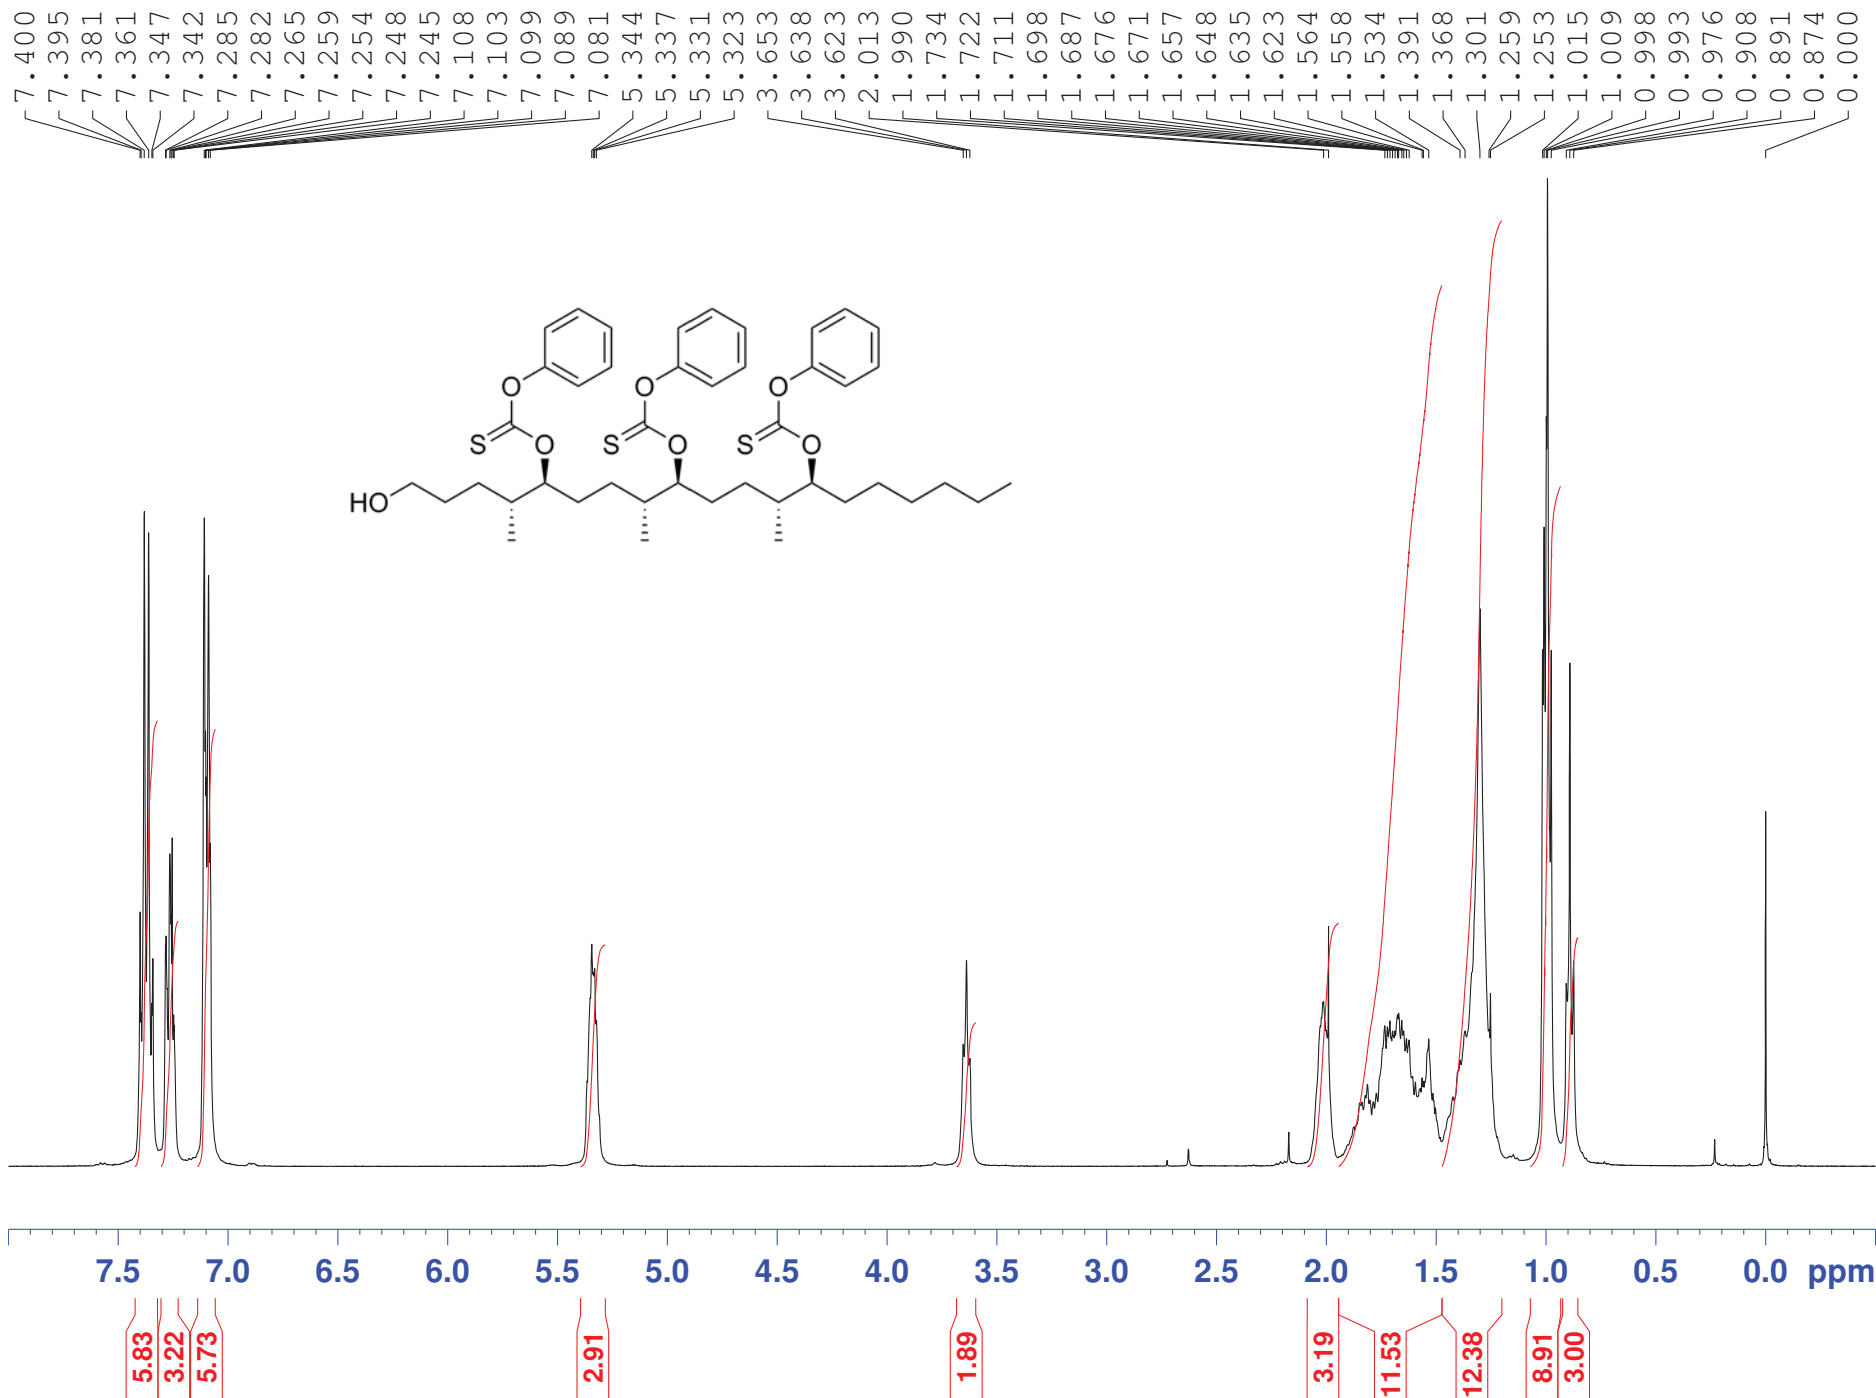

Yeh and coworkers

Trimethylnonadecanol stereoisomer library

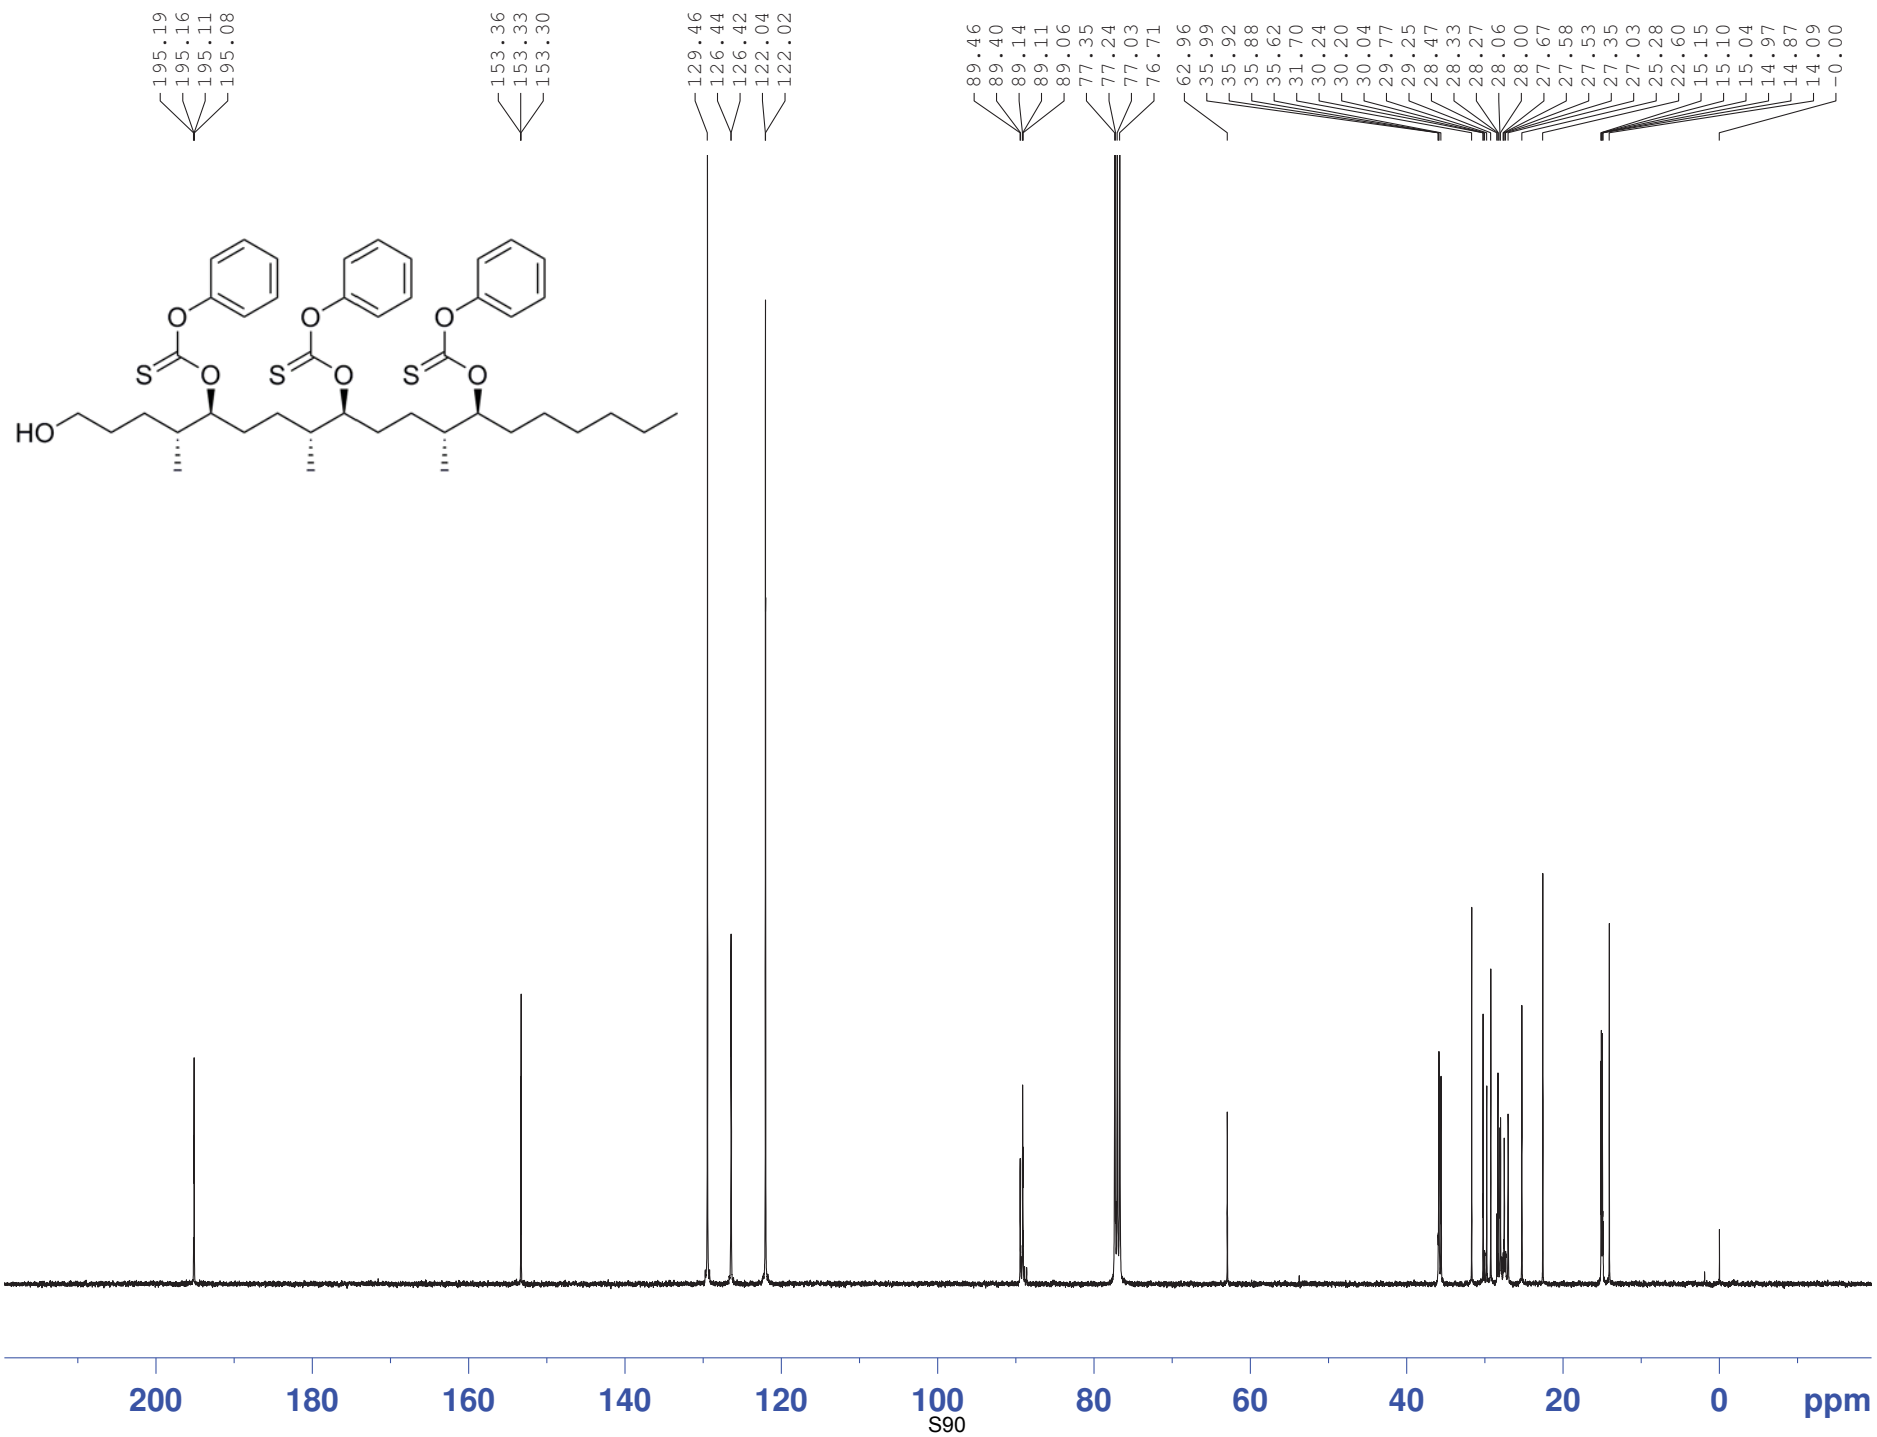

7.410  
7.403  
7.390  
7.384  
7.371  
7.364  
7.291  
7.273  
7.256  
7.108  
7.102  
7.088  
7.081  
7.068  
7.057  
7.045  
7.024  
7.001  
5.356  
5.348  
5.335  
5.327  
5.313  
3.669  
3.654  
3.639  
2.020  
1.905  
1.893  
1.880  
1.740  
1.728  
1.719  
1.685  
1.671  
1.661  
1.649  
1.638  
1.623  
1.586  
1.573  
1.562  
1.544  
1.525  
1.367  
1.357  
1.298  
1.254  
1.010  
1.003  
0.994  
0.986  
0.907  
0.891  
0.874

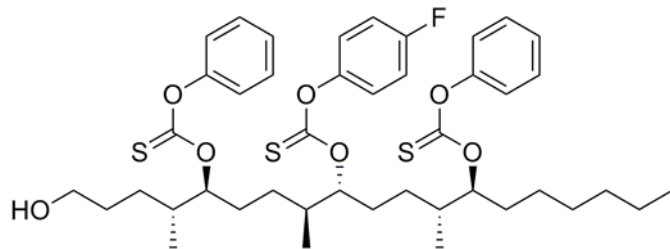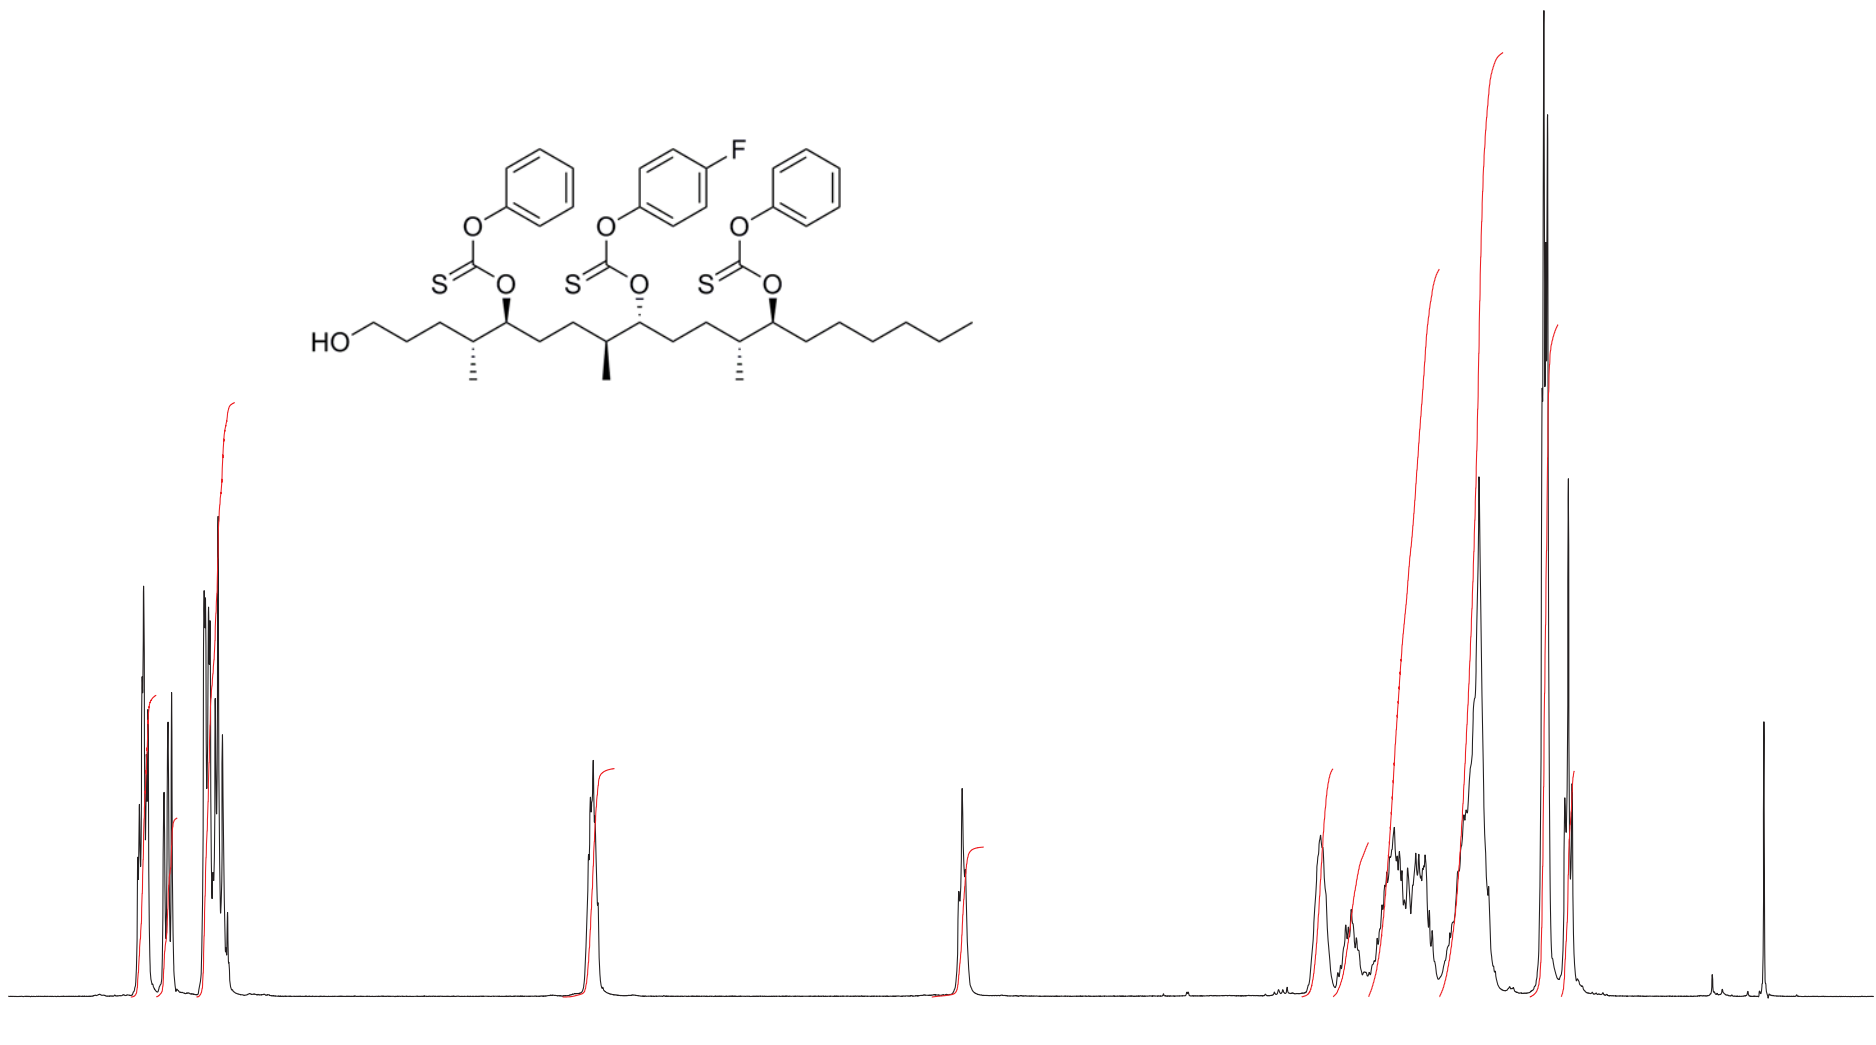

7.5 7.0 6.5 6.0 5.5 5.0 4.5 4.0 3.5 3.0 2.5 2.0 1.5 1.0 0.5 0.0 ppm

4.00  
2.38  
7.89

3.03

1.99

3.03  
2.05  
9.66  
12.53  
8.92  
3.00

Yeh and coworkers

Trimethylnonadecanol stereoisomer library

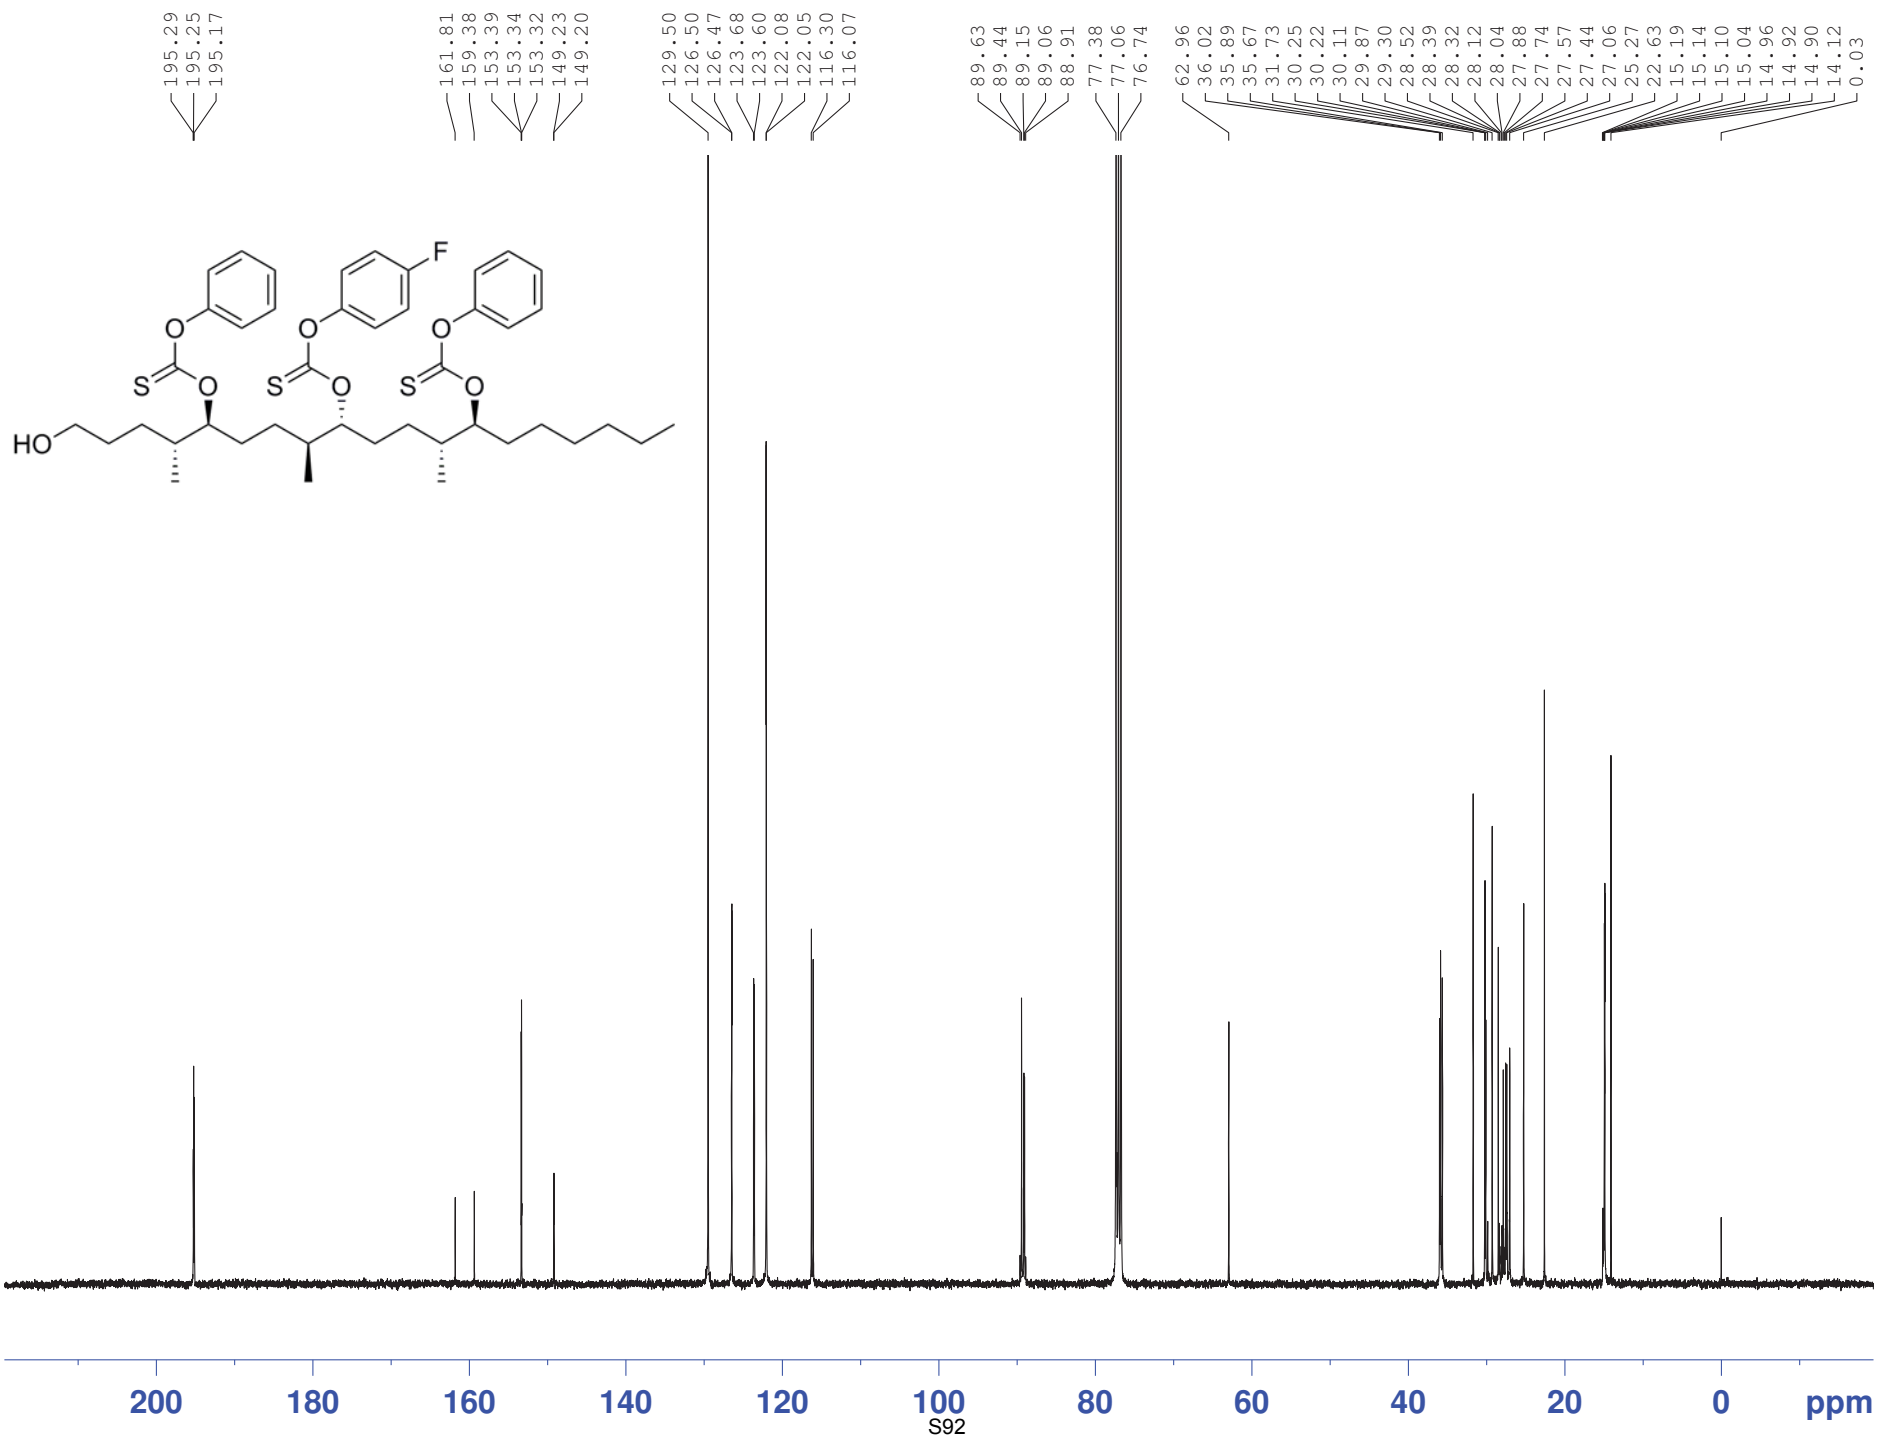

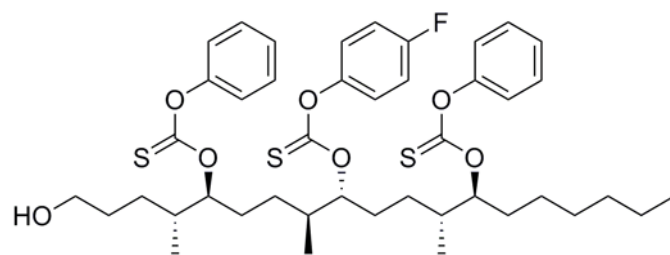

-115.87  
-115.89  
-115.92  
-115.93  
-115.94  
-115.95  
-115.96

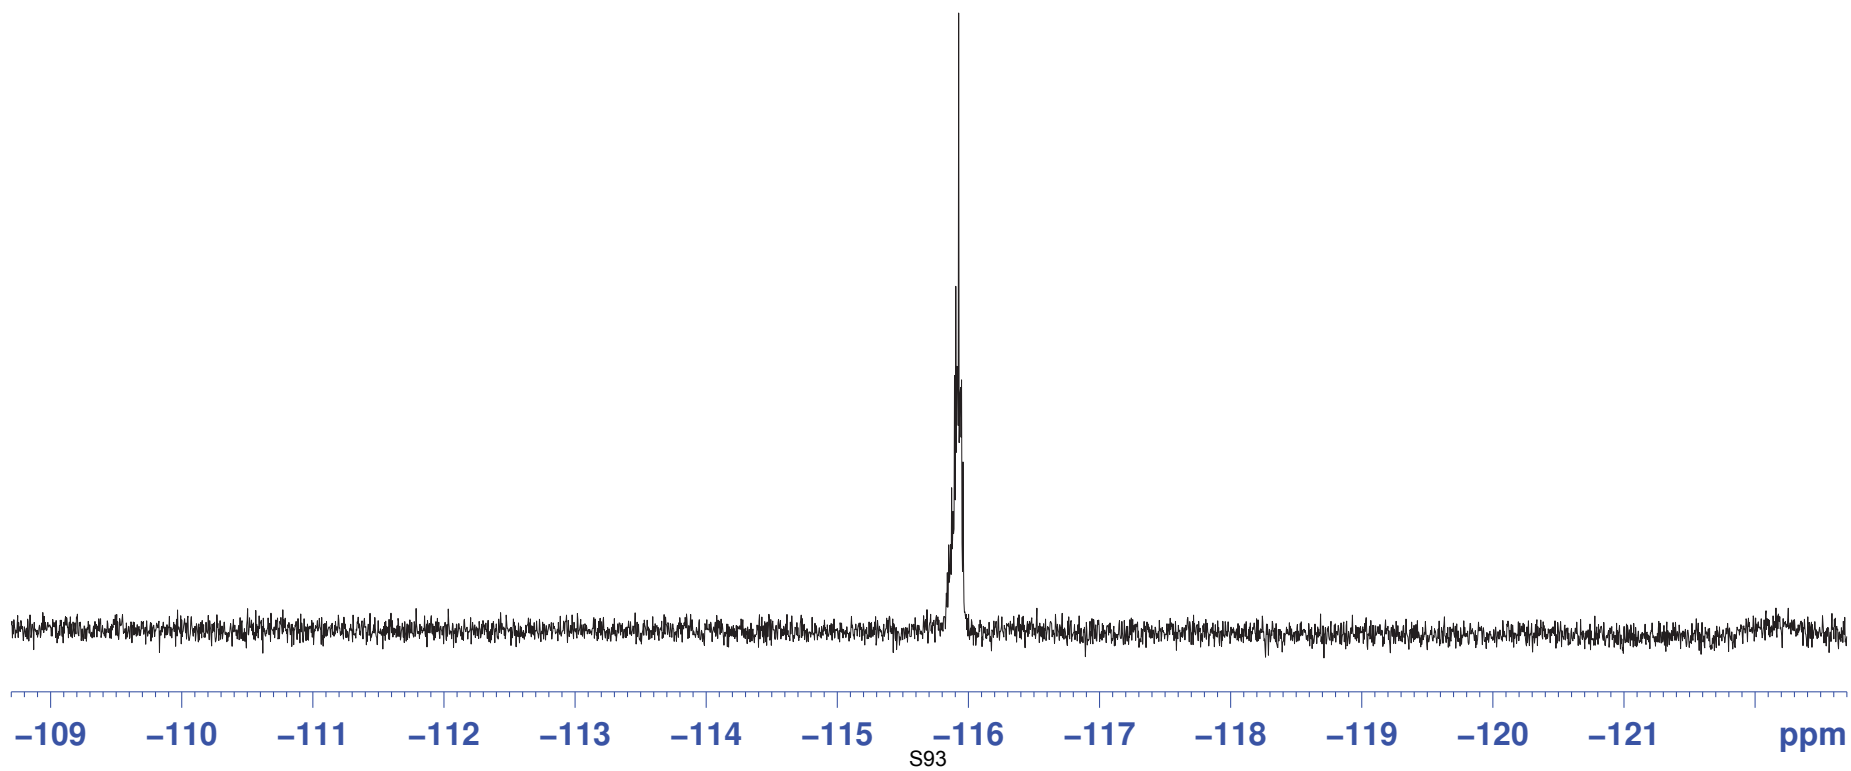

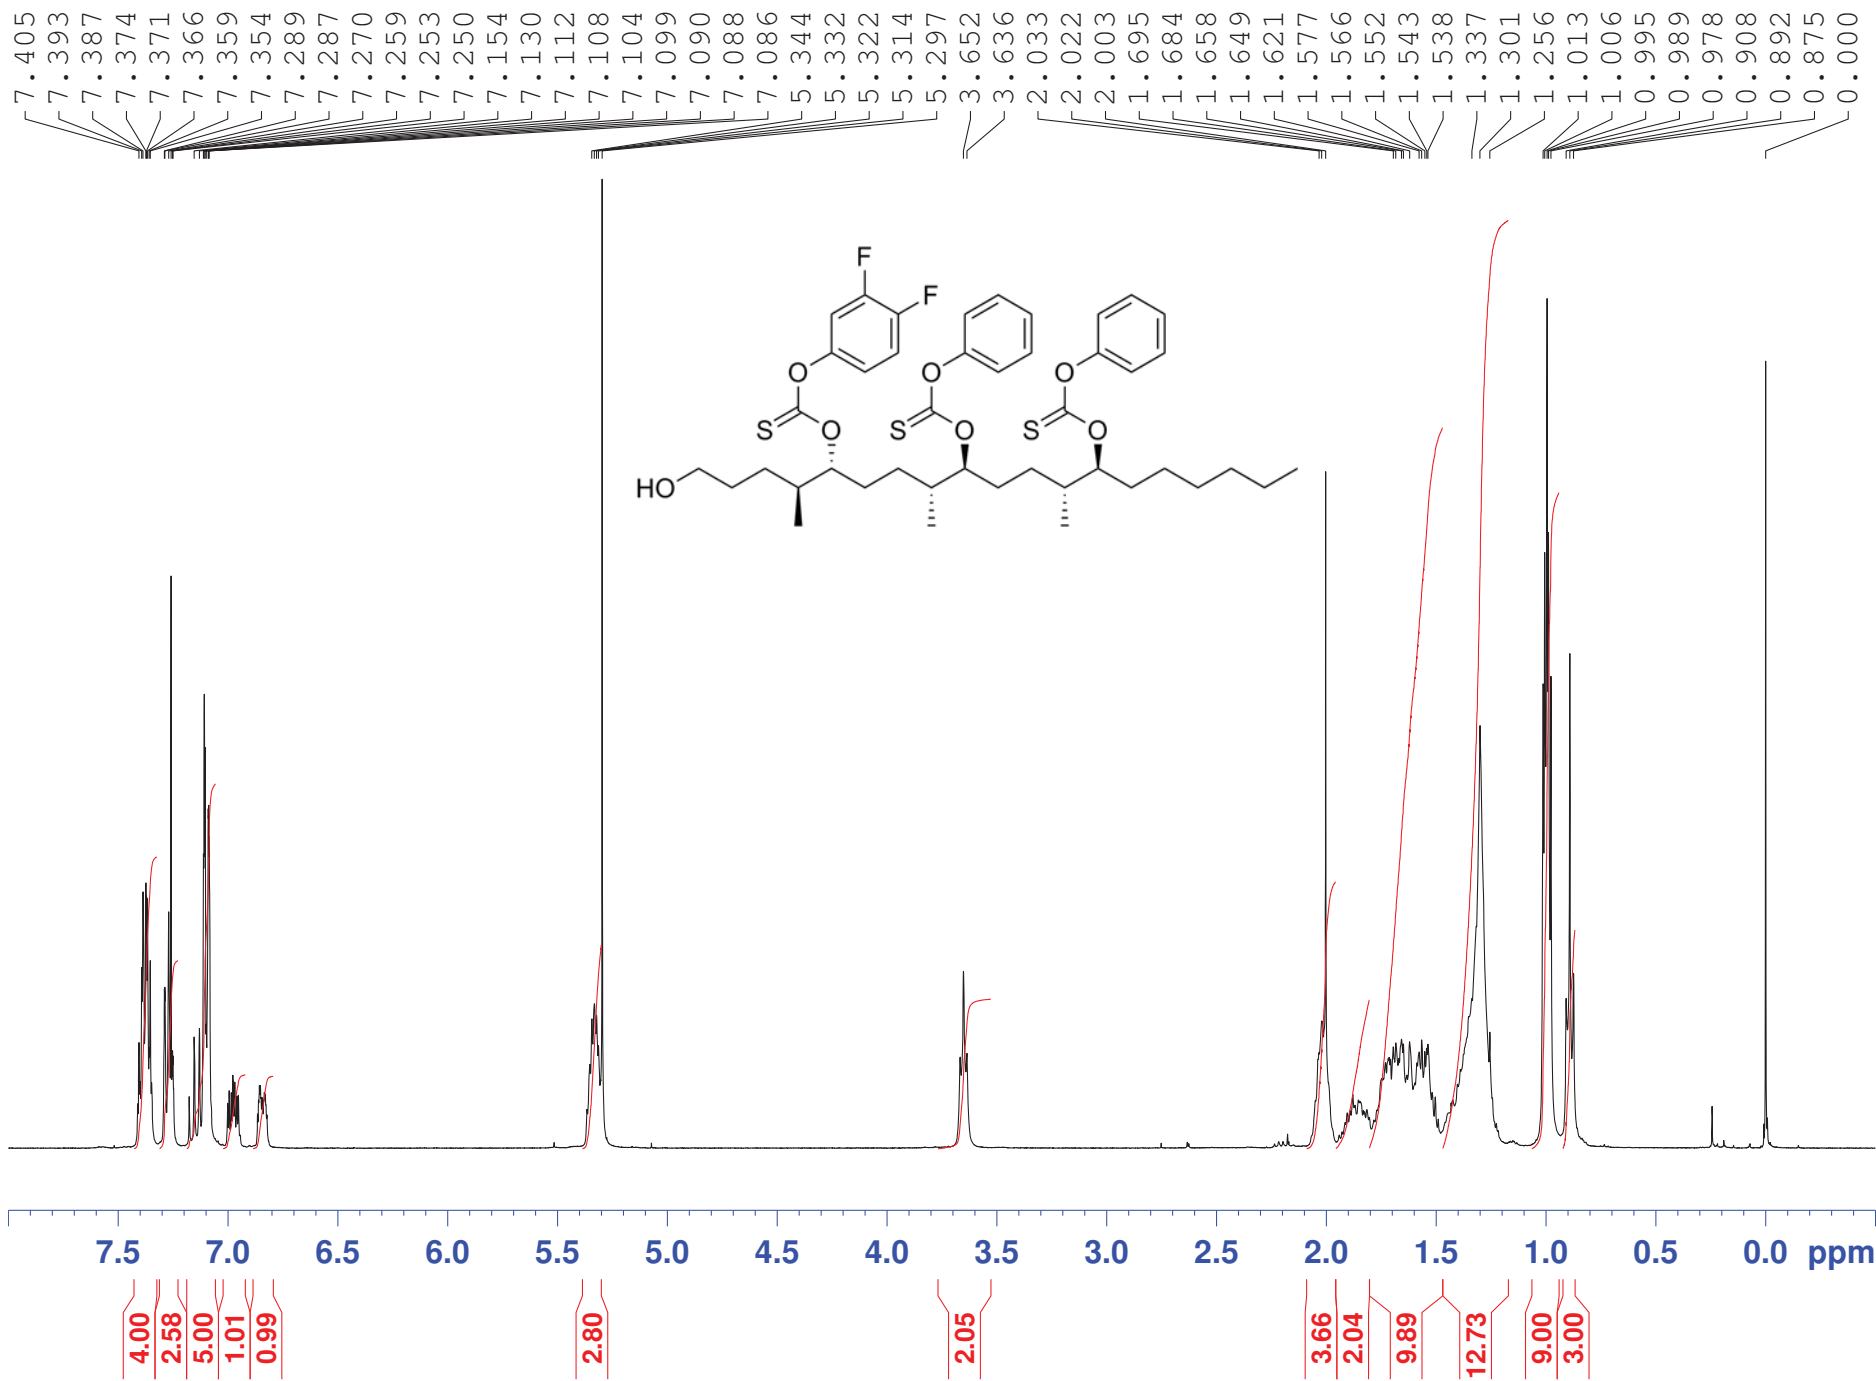

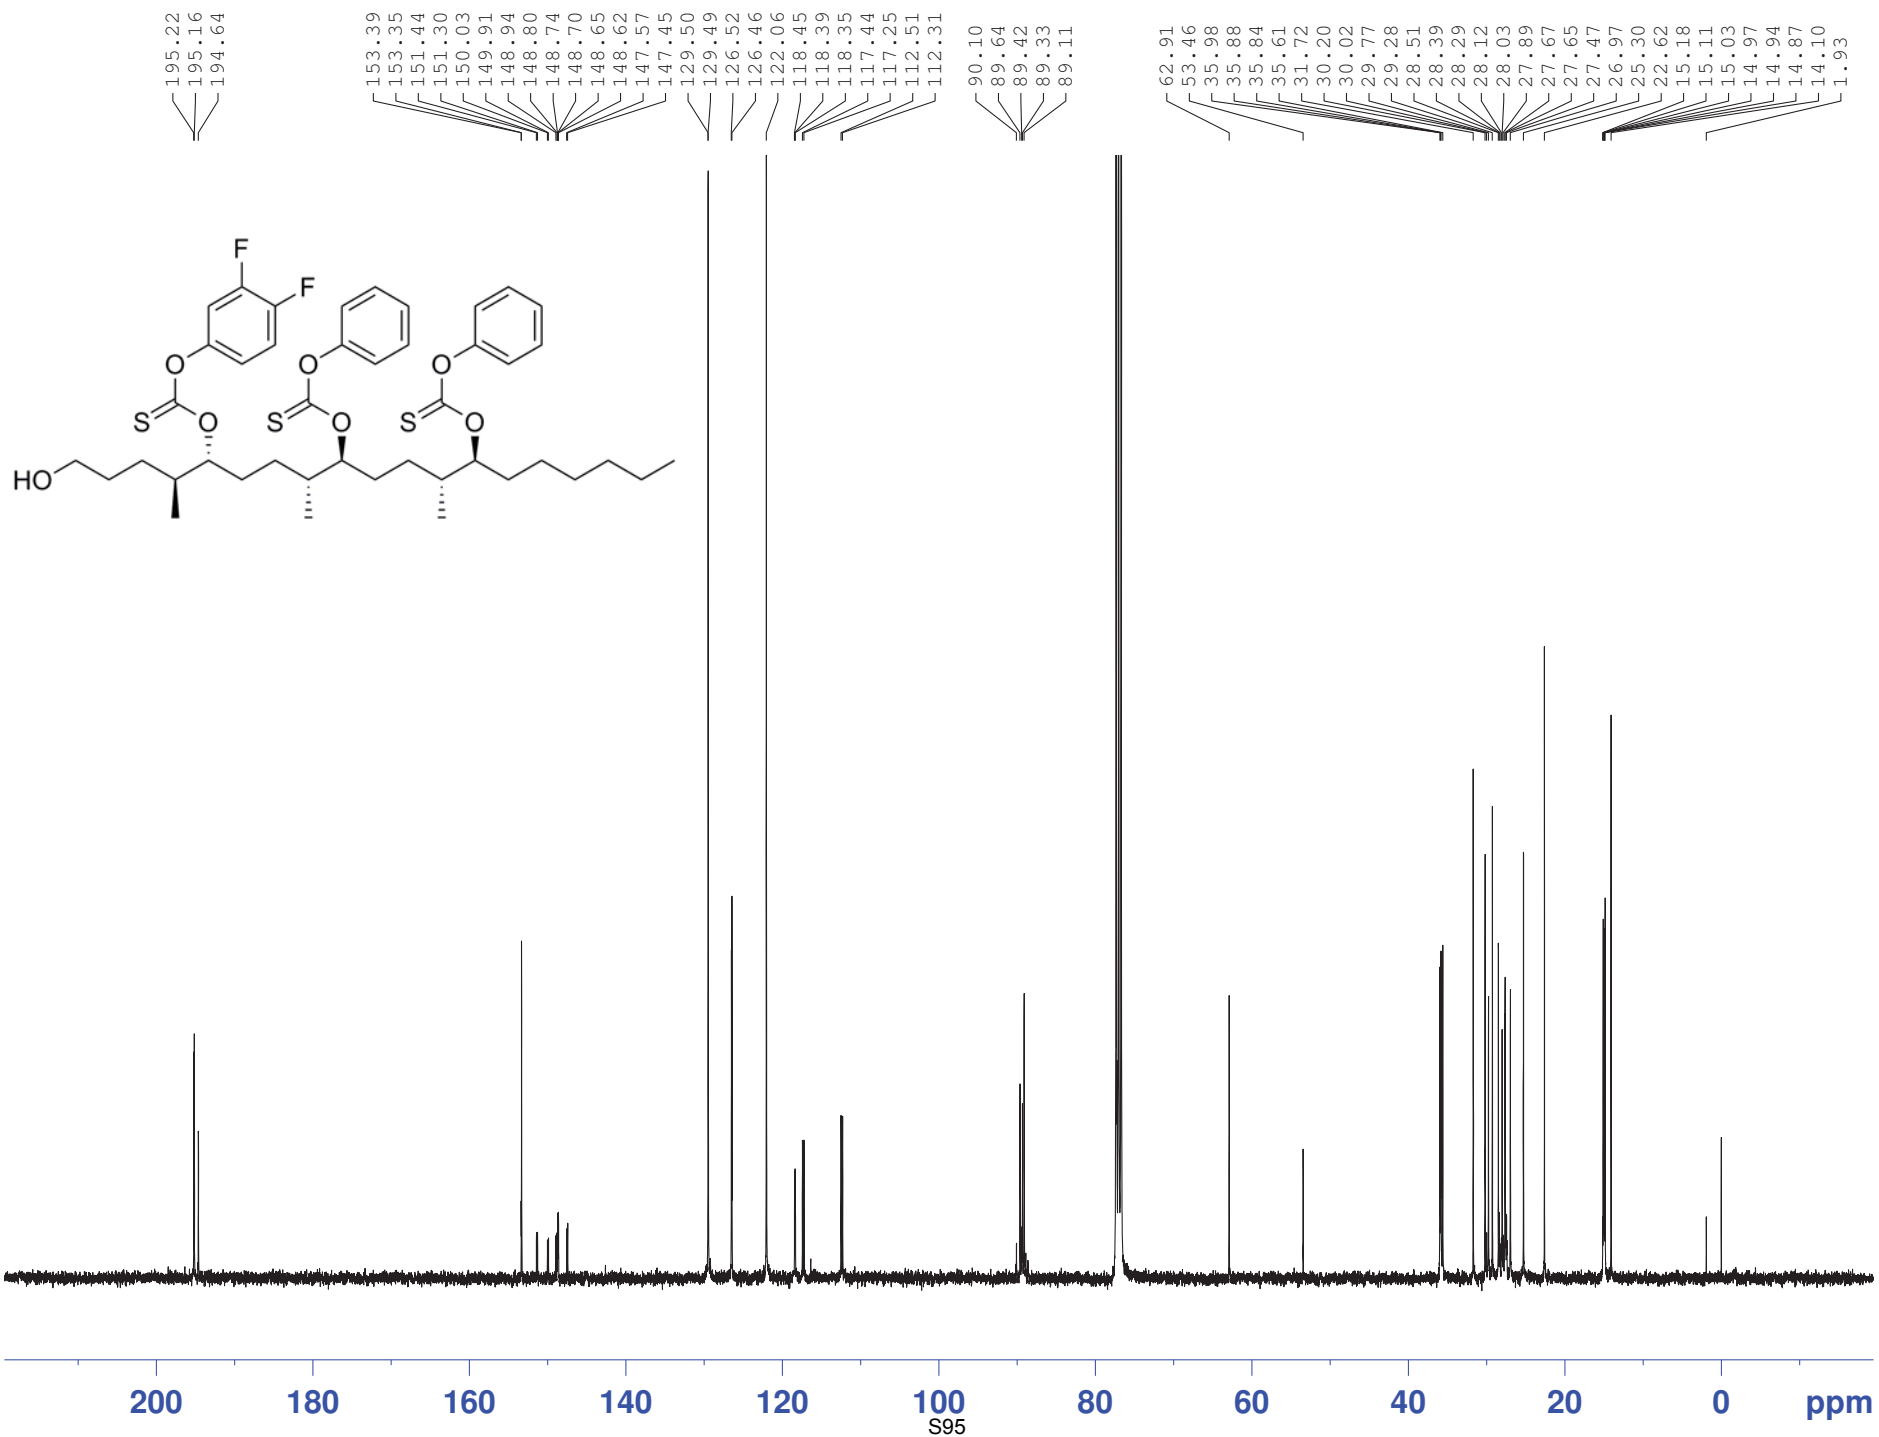

-134.09  
-134.12  
-134.14  
-134.17  
-134.20

-139.68  
-139.70  
-139.71  
-139.72  
-139.73  
-139.74  
-139.75  
-139.76  
-139.77  
-139.78  
-139.79  
-139.80  
-139.81

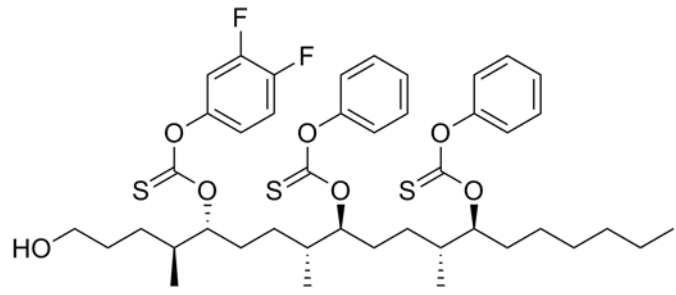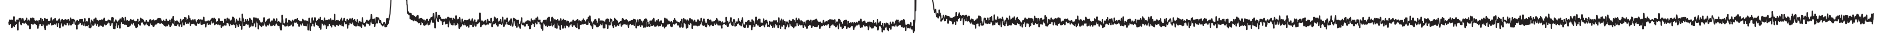

-132      -134      -136      -138      -140      -142      -144      -146      -148      ppm

S96



7.412  
7.393  
7.377  
7.373  
7.297  
7.278  
7.259  
7.162  
7.139  
7.109  
7.106  
7.087  
7.067  
7.056  
7.052  
7.047  
7.045  
7.039  
7.034  
7.028  
5.332  
5.322  
5.311  
3.670  
3.654  
3.639  
2.030  
2.019  
2.014  
2.003  
1.724  
1.708  
1.701  
1.696  
1.683  
1.674  
1.660  
1.647  
1.597  
1.584  
1.573  
1.560  
1.543  
1.538  
1.385  
1.362  
1.298  
1.016  
1.002  
0.986  
0.978  
0.908  
0.891  
0.874  
-0.000

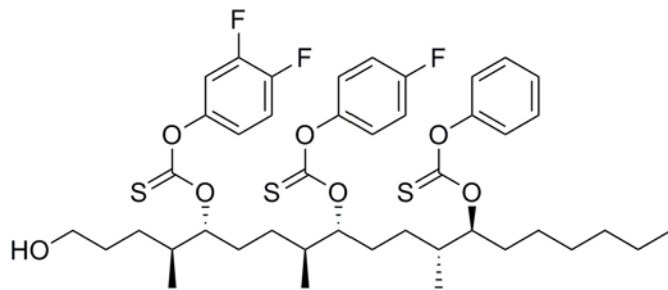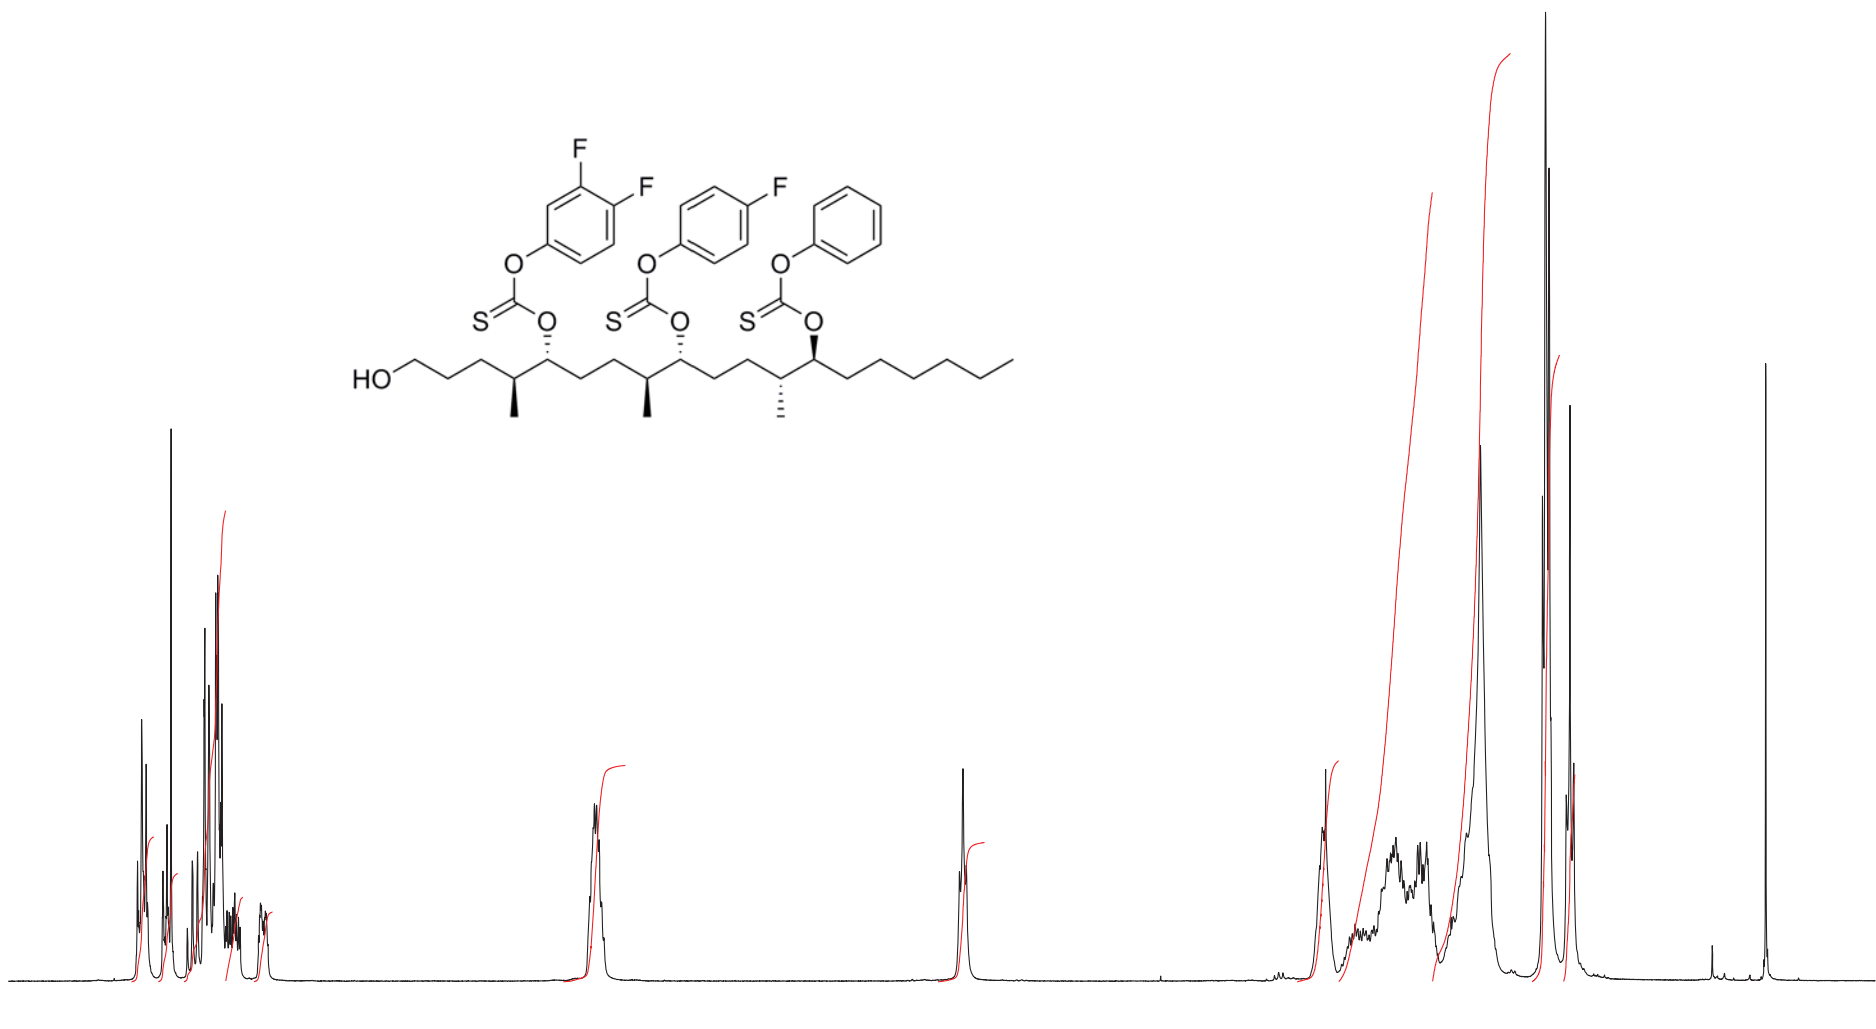

7.5  
7.0  
6.5  
6.0  
5.5  
5.0  
4.5  
4.0  
3.5  
3.0  
2.5  
2.0  
1.5  
1.0  
0.5  
0.0 ppm

2.10  
1.57  
6.82  
1.22  
1.01

3.13

2.02

3.20  
11.43  
13.44  
9.08  
3.00

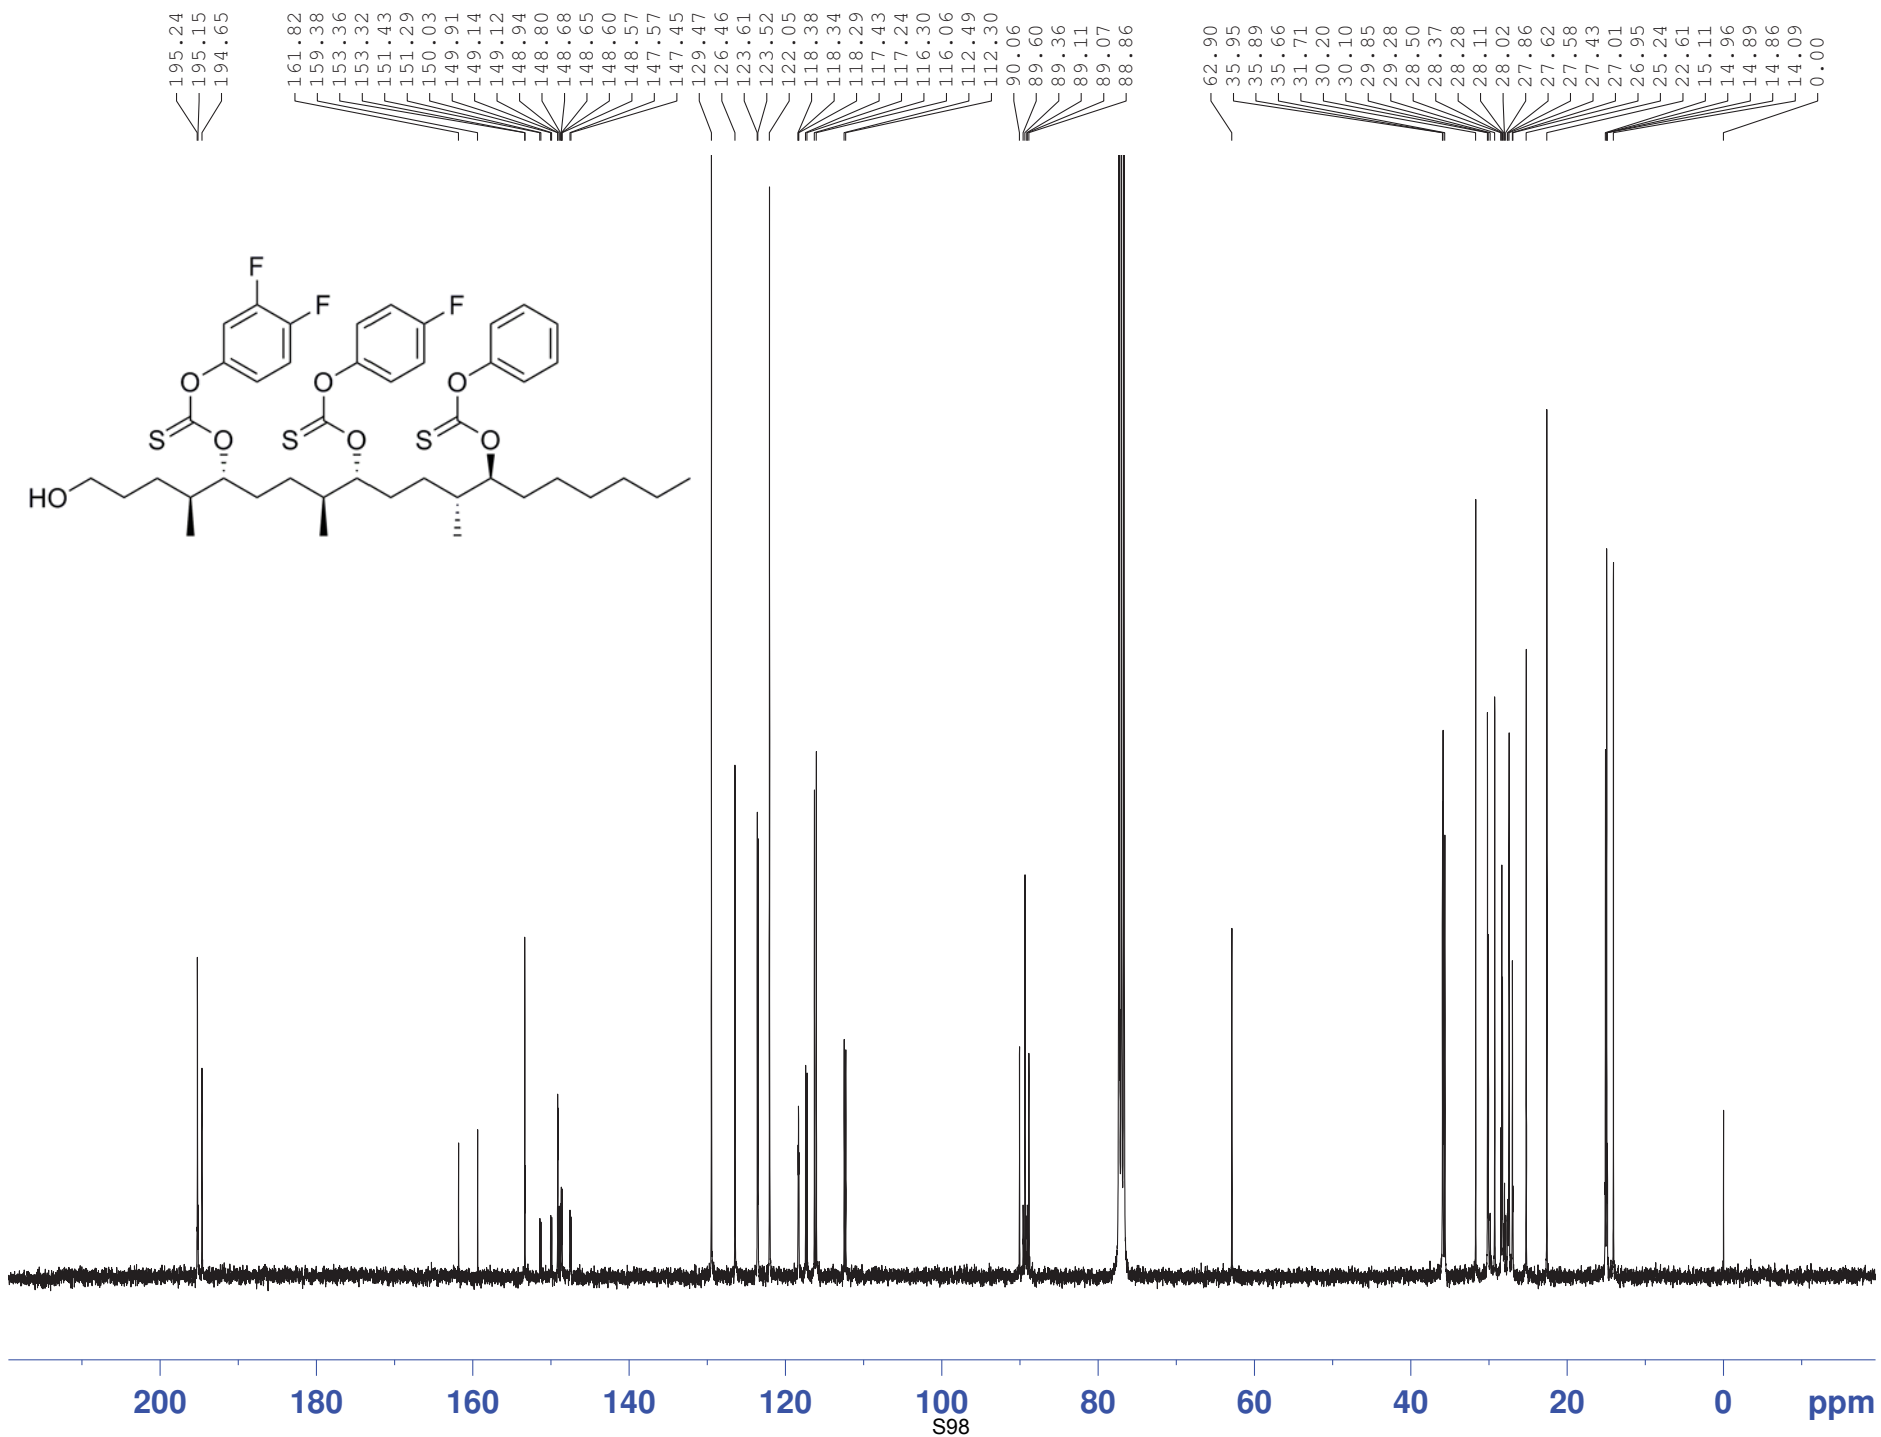

--115.74  
--115.75  
--115.76  
--115.77  
--115.78  
--115.79  
--115.80  
--115.81

--134.05  
--134.07  
--134.10  
--134.13  
--134.15  
--139.58  
--139.59  
--139.59  
--139.60  
--139.61  
--139.62  
--139.63  
--139.64  
--139.65  
--139.66  
--139.67  
--139.68  
--139.69  
--139.69  
--139.70

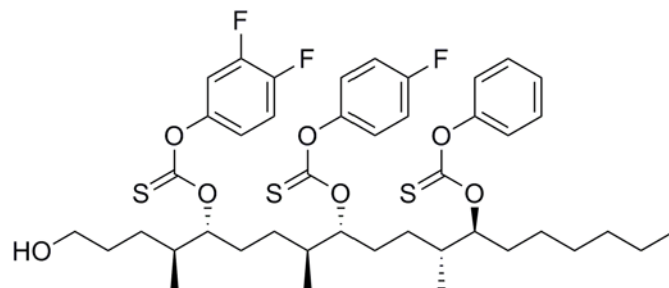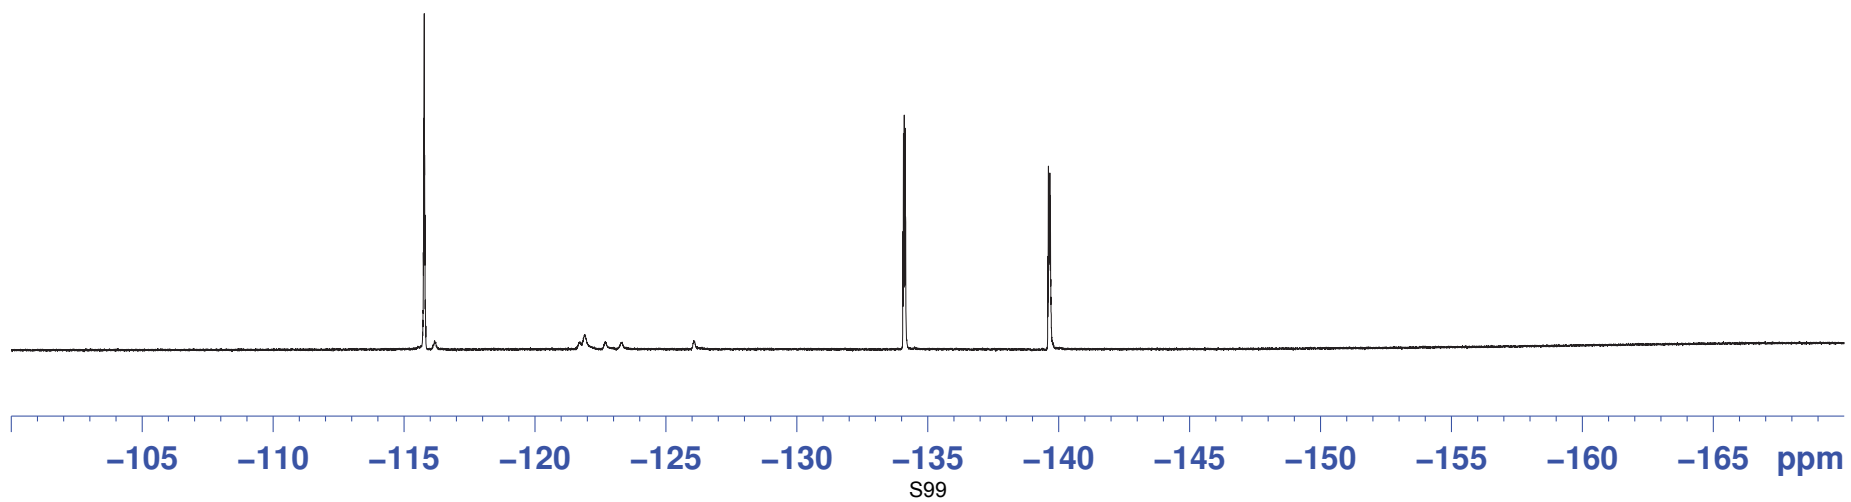

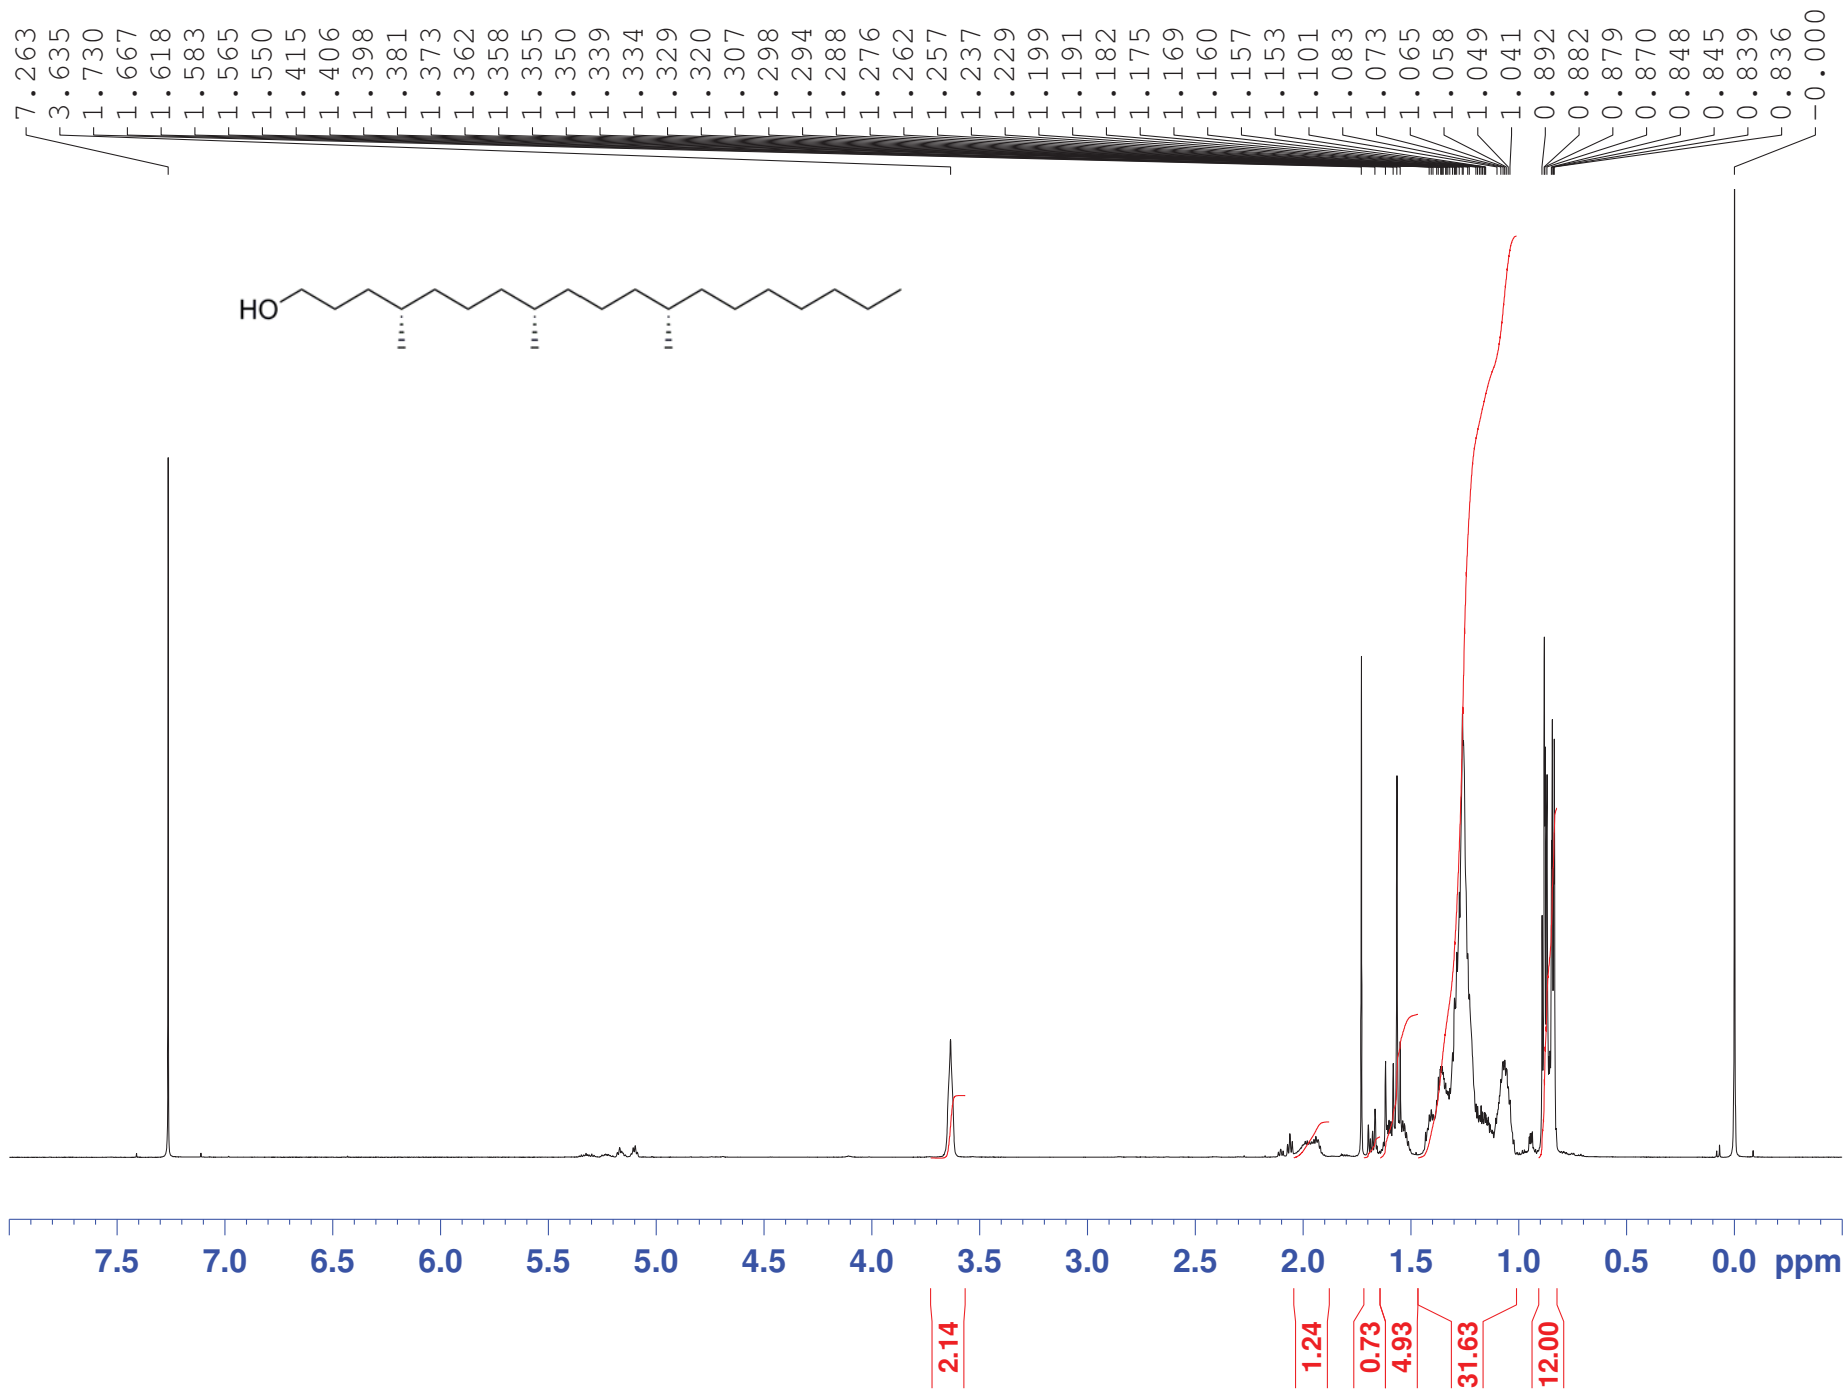

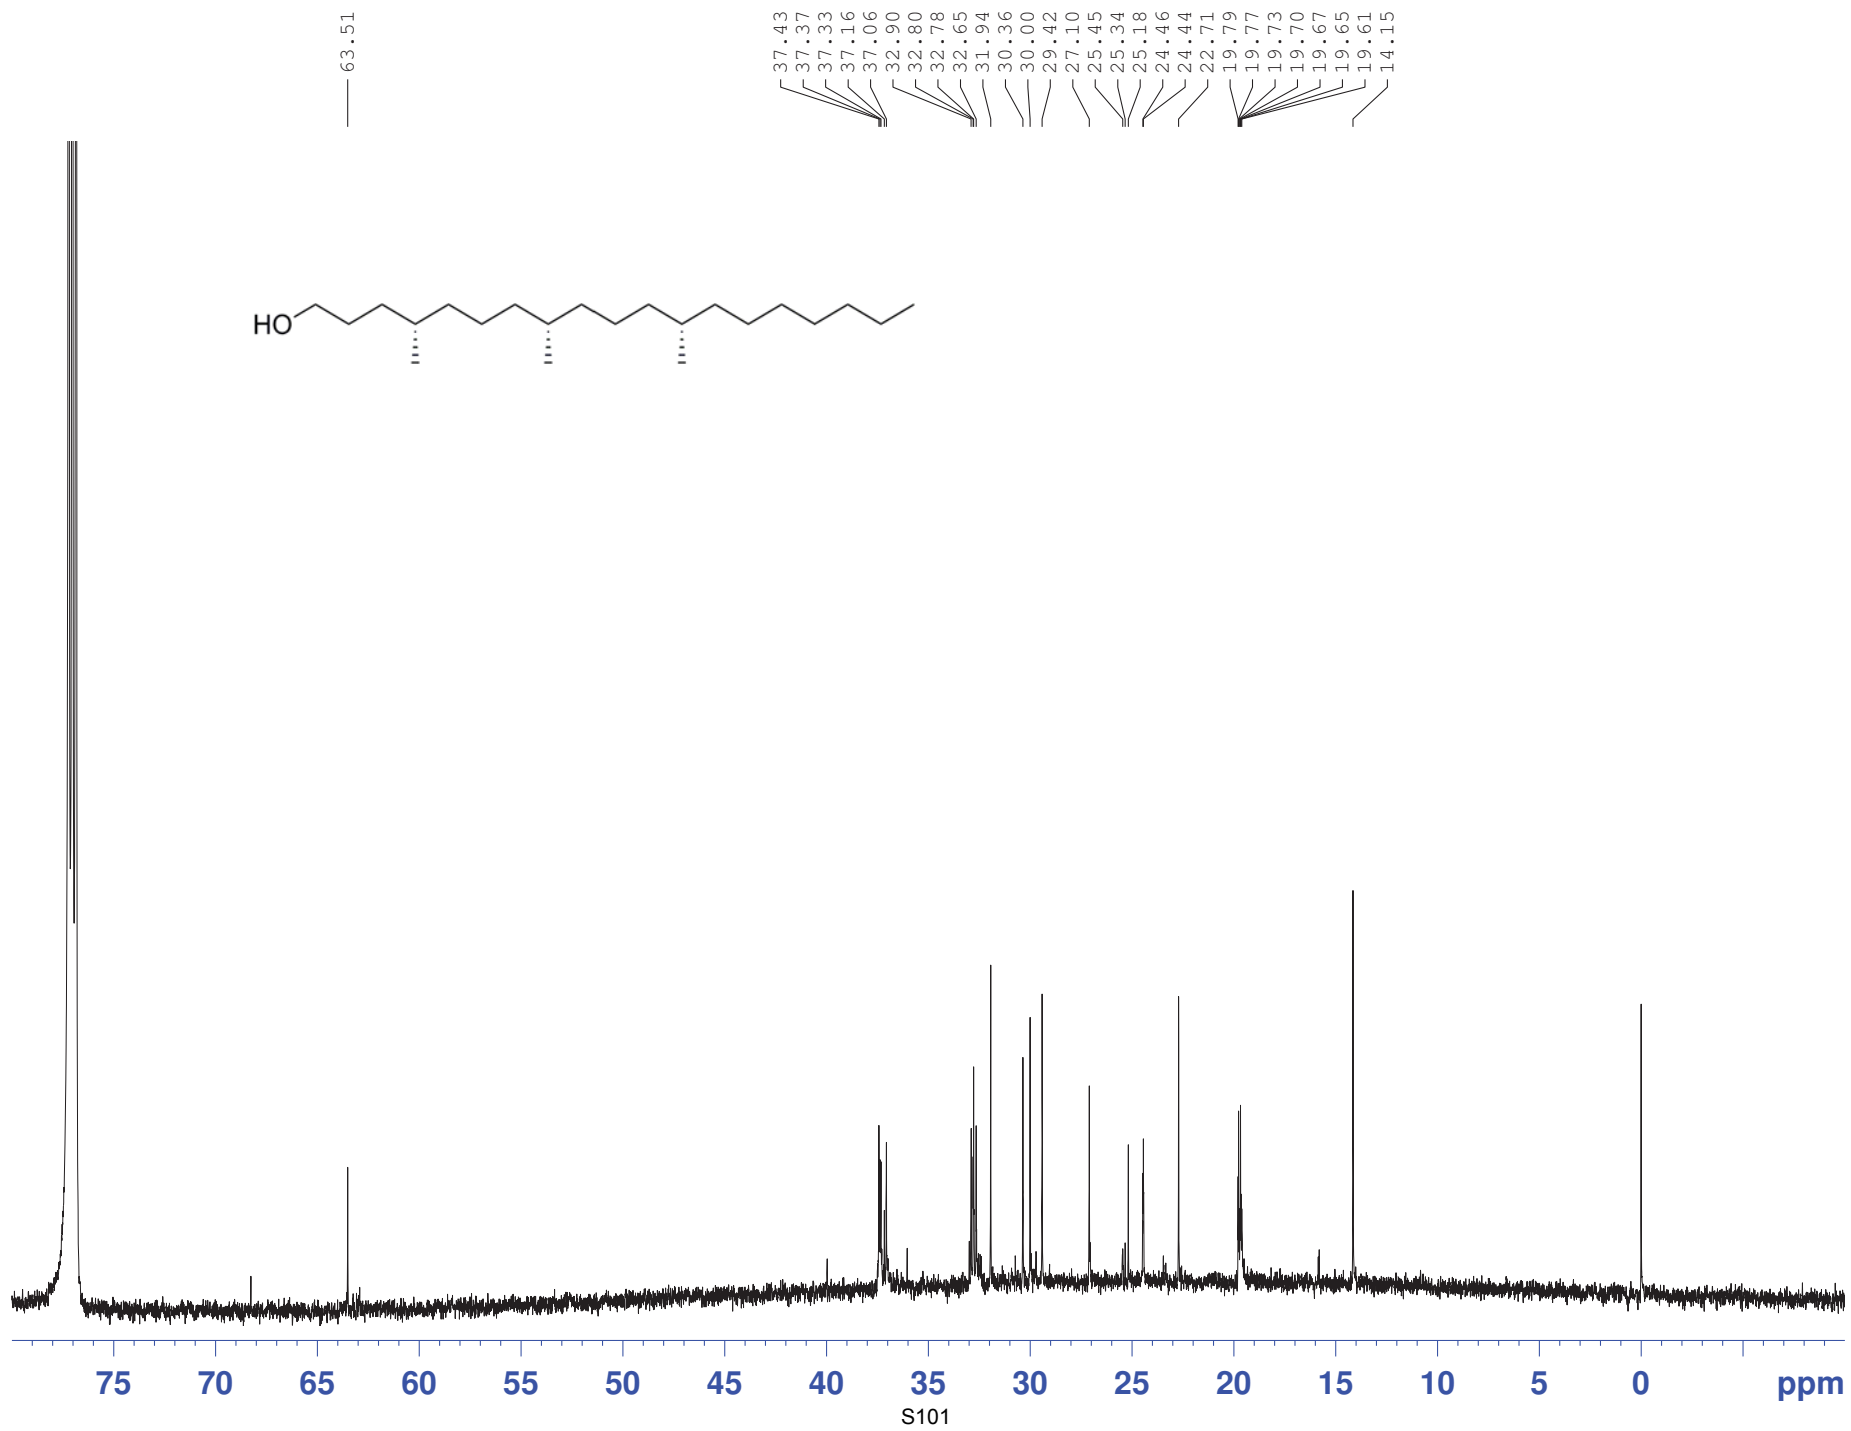

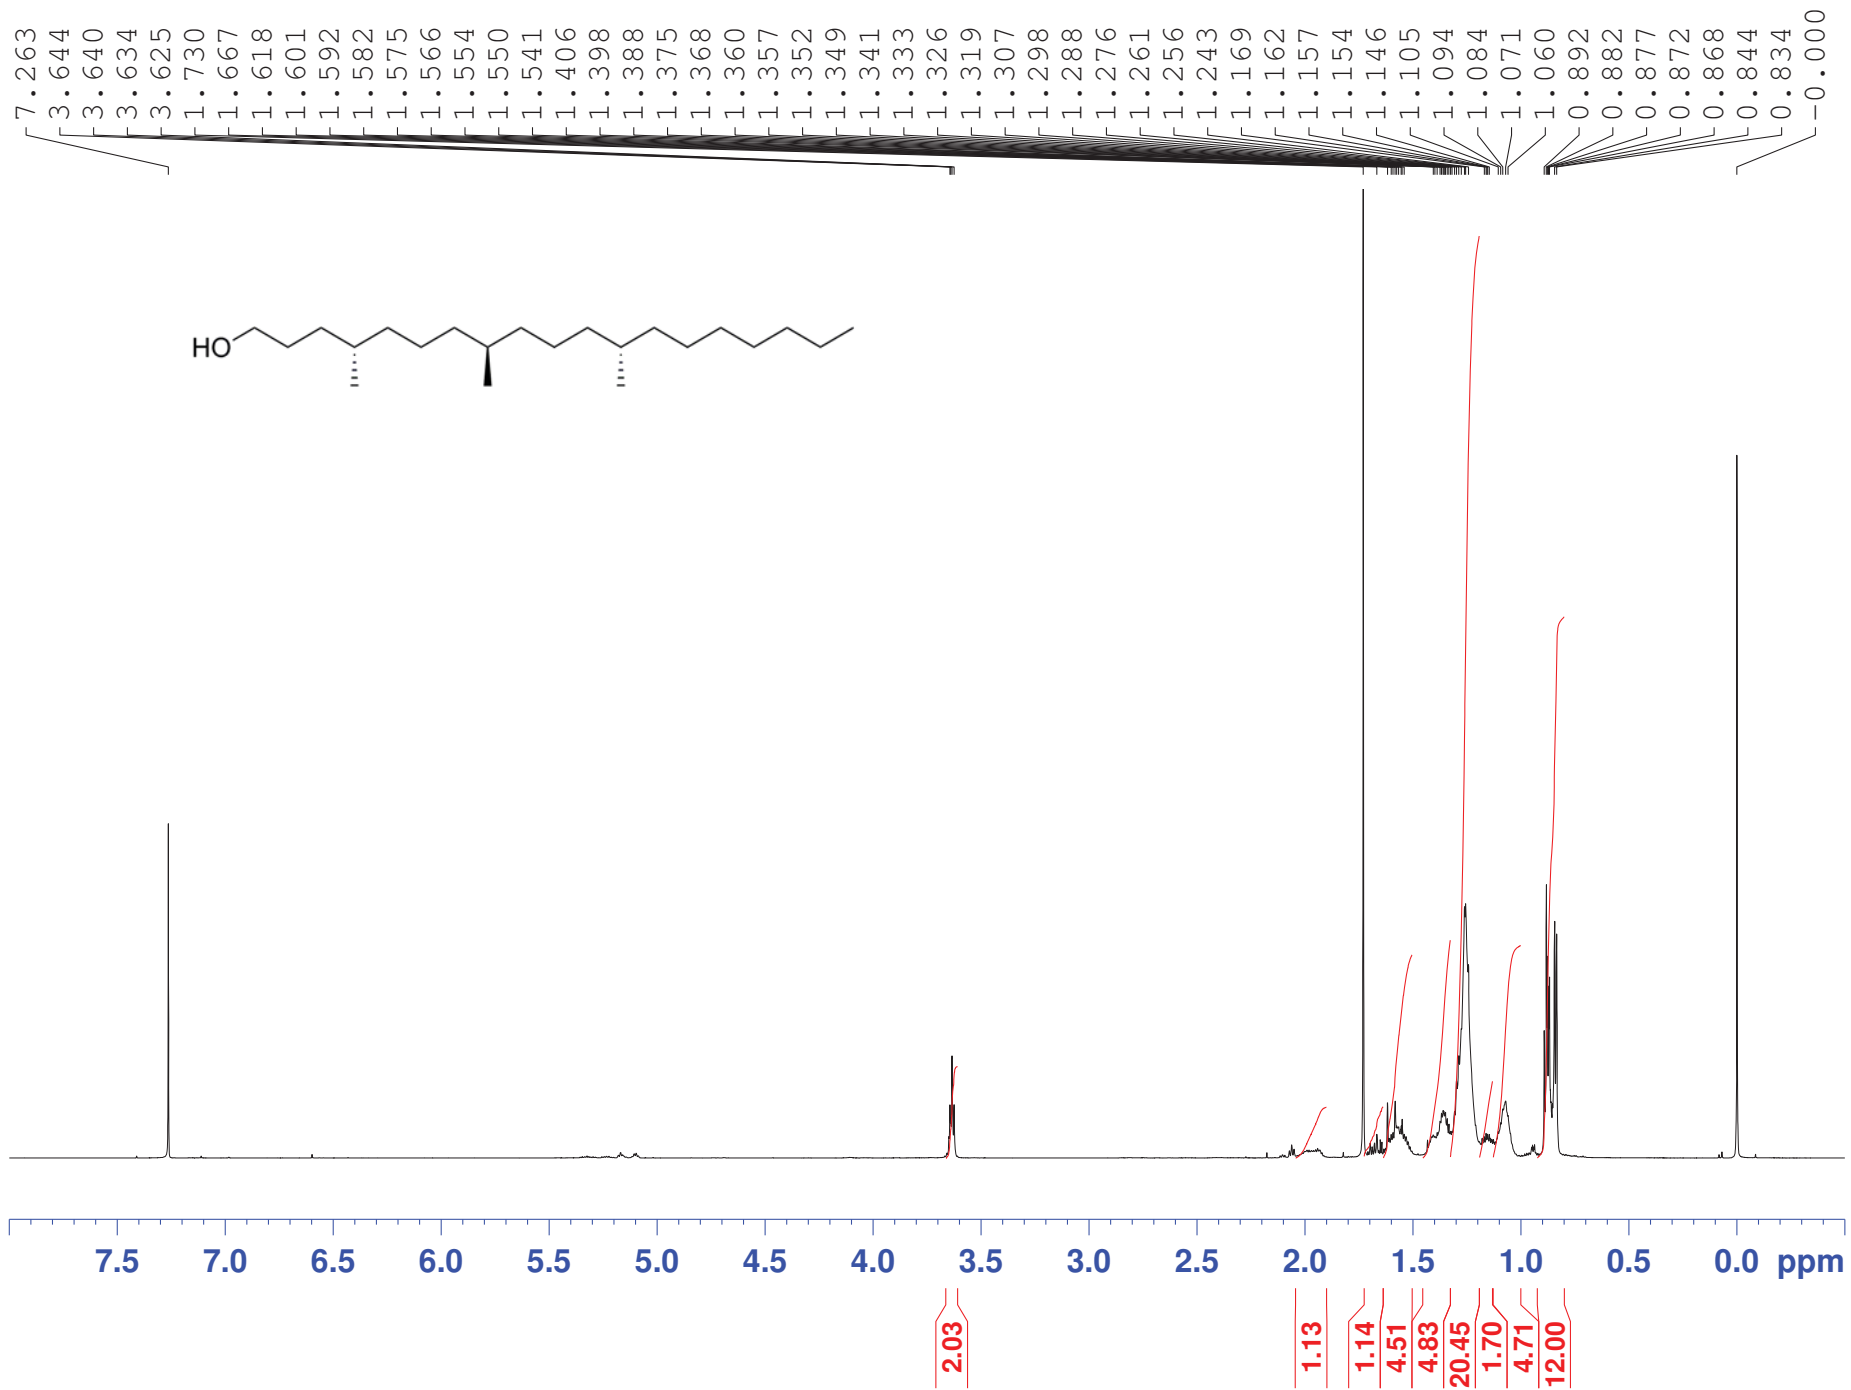

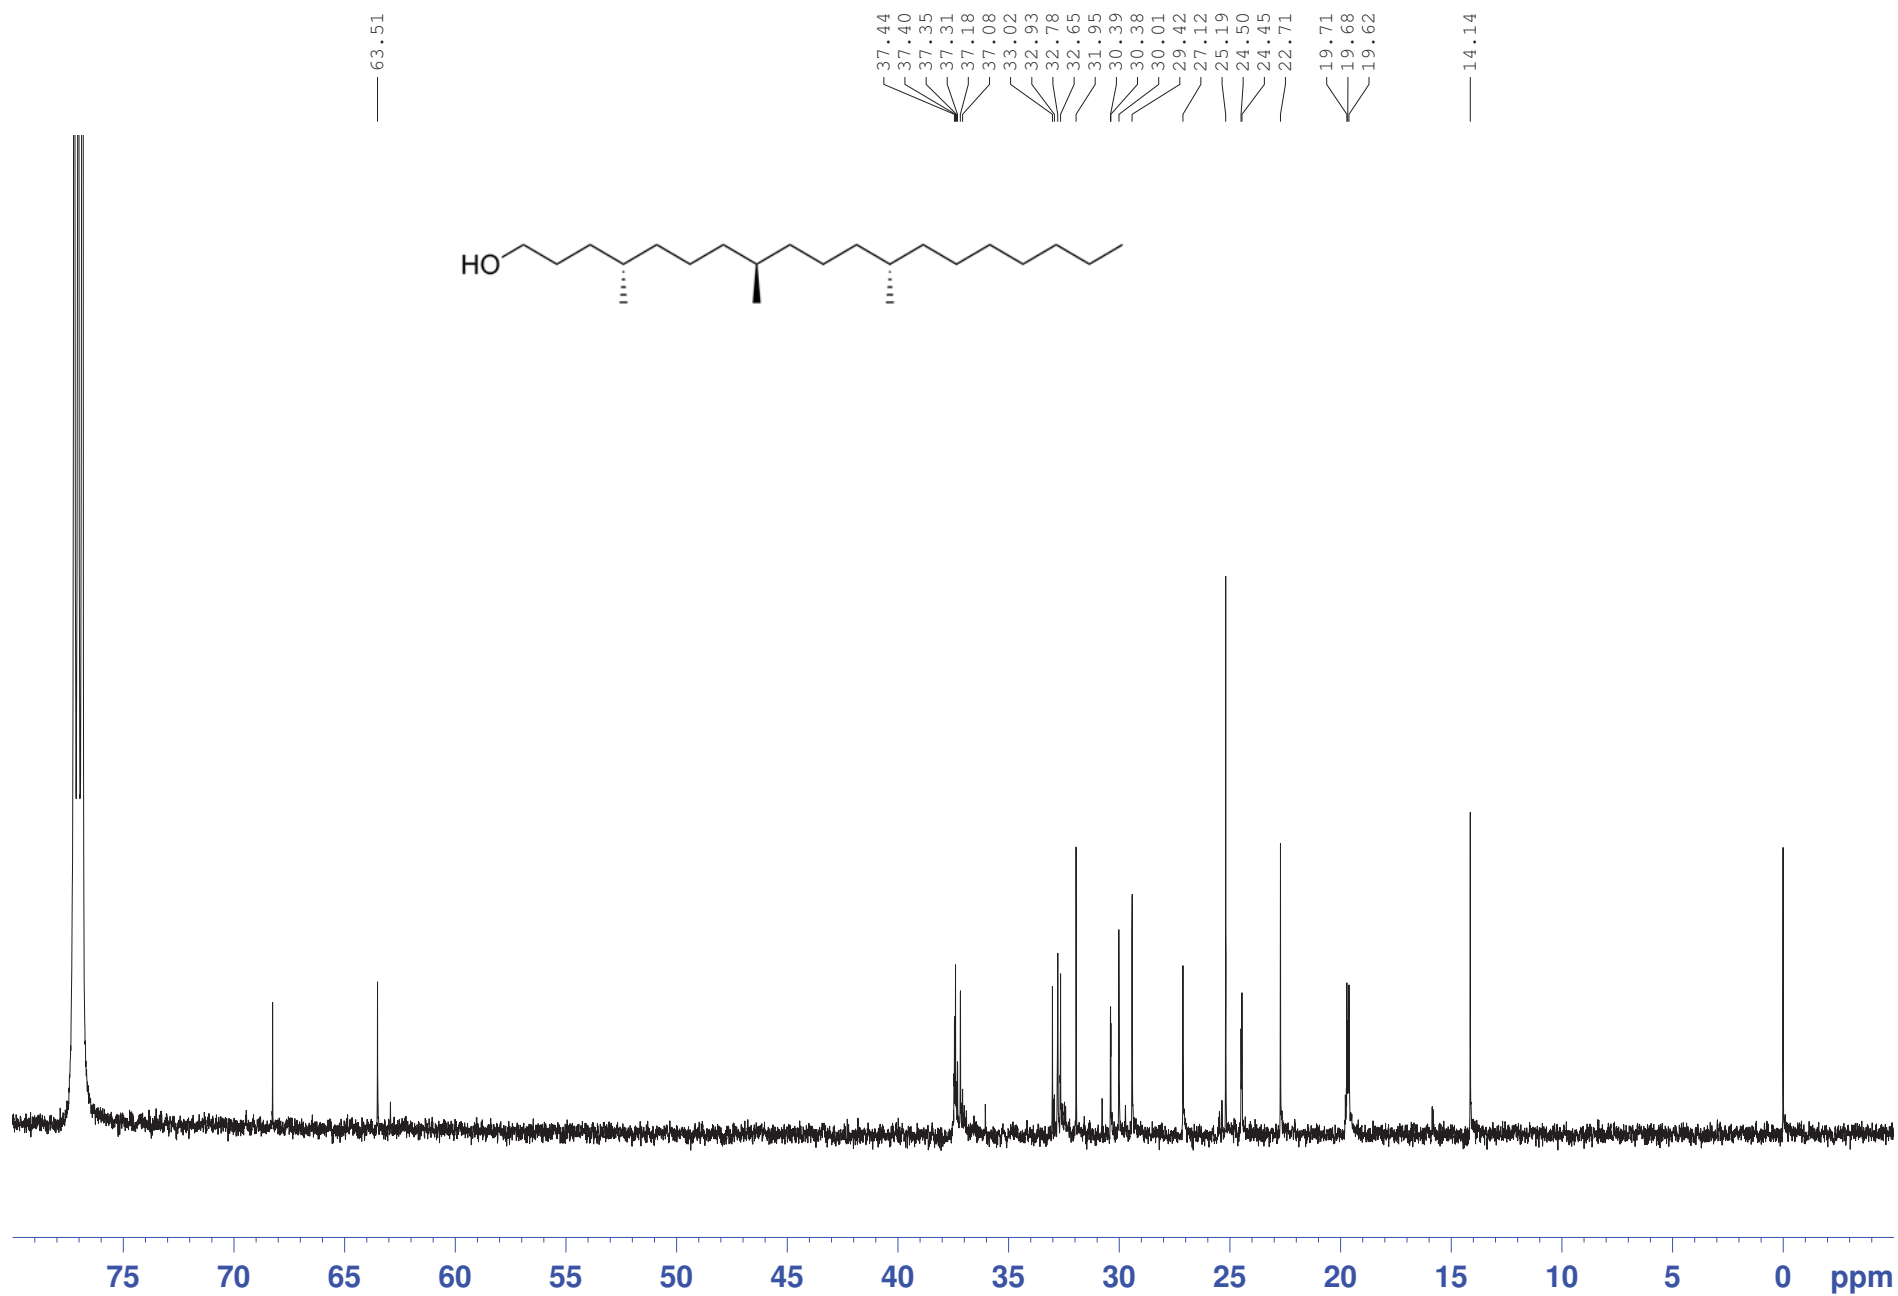

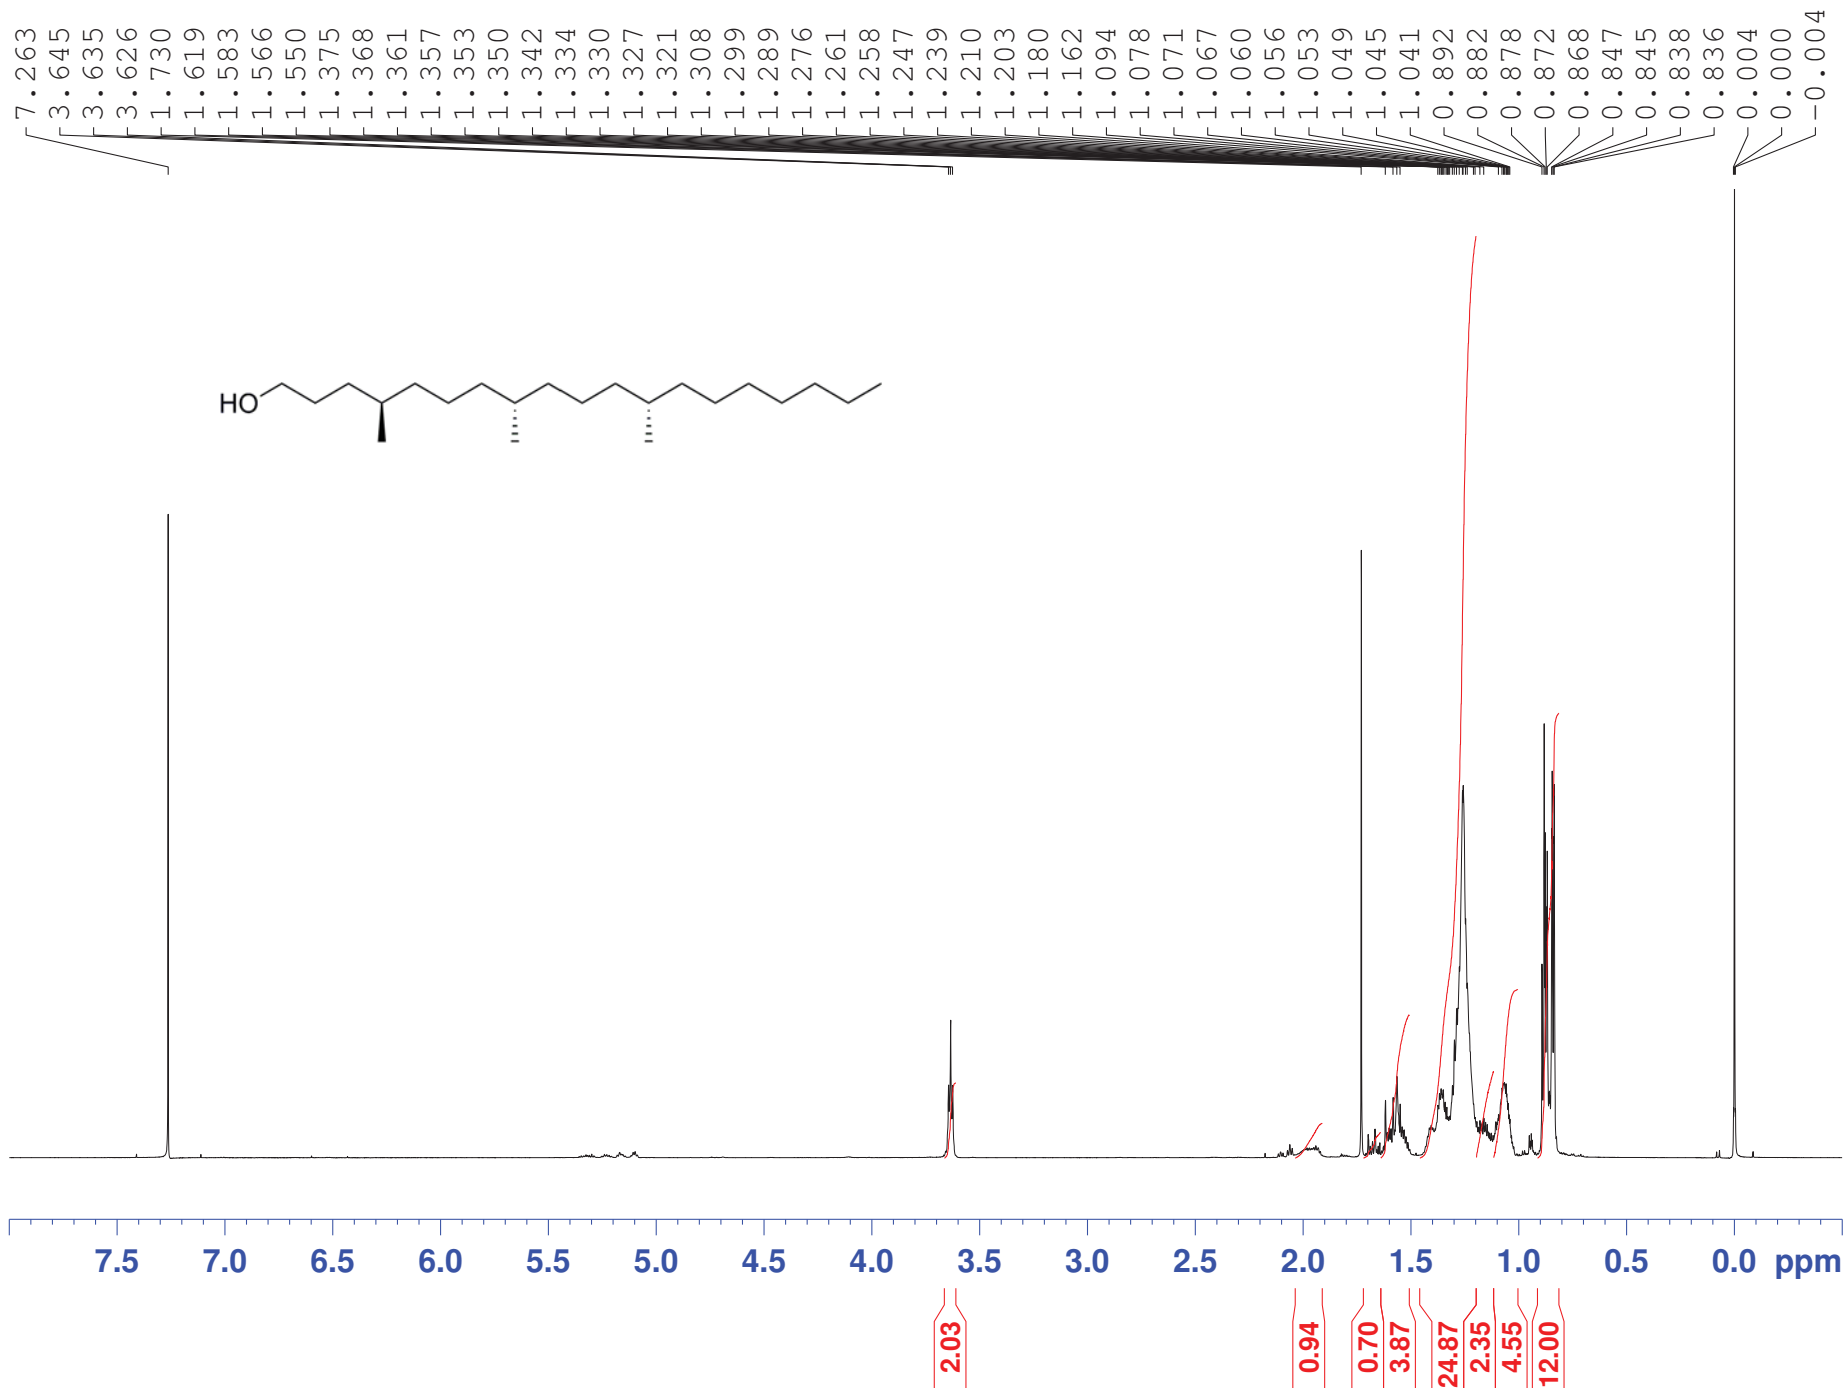



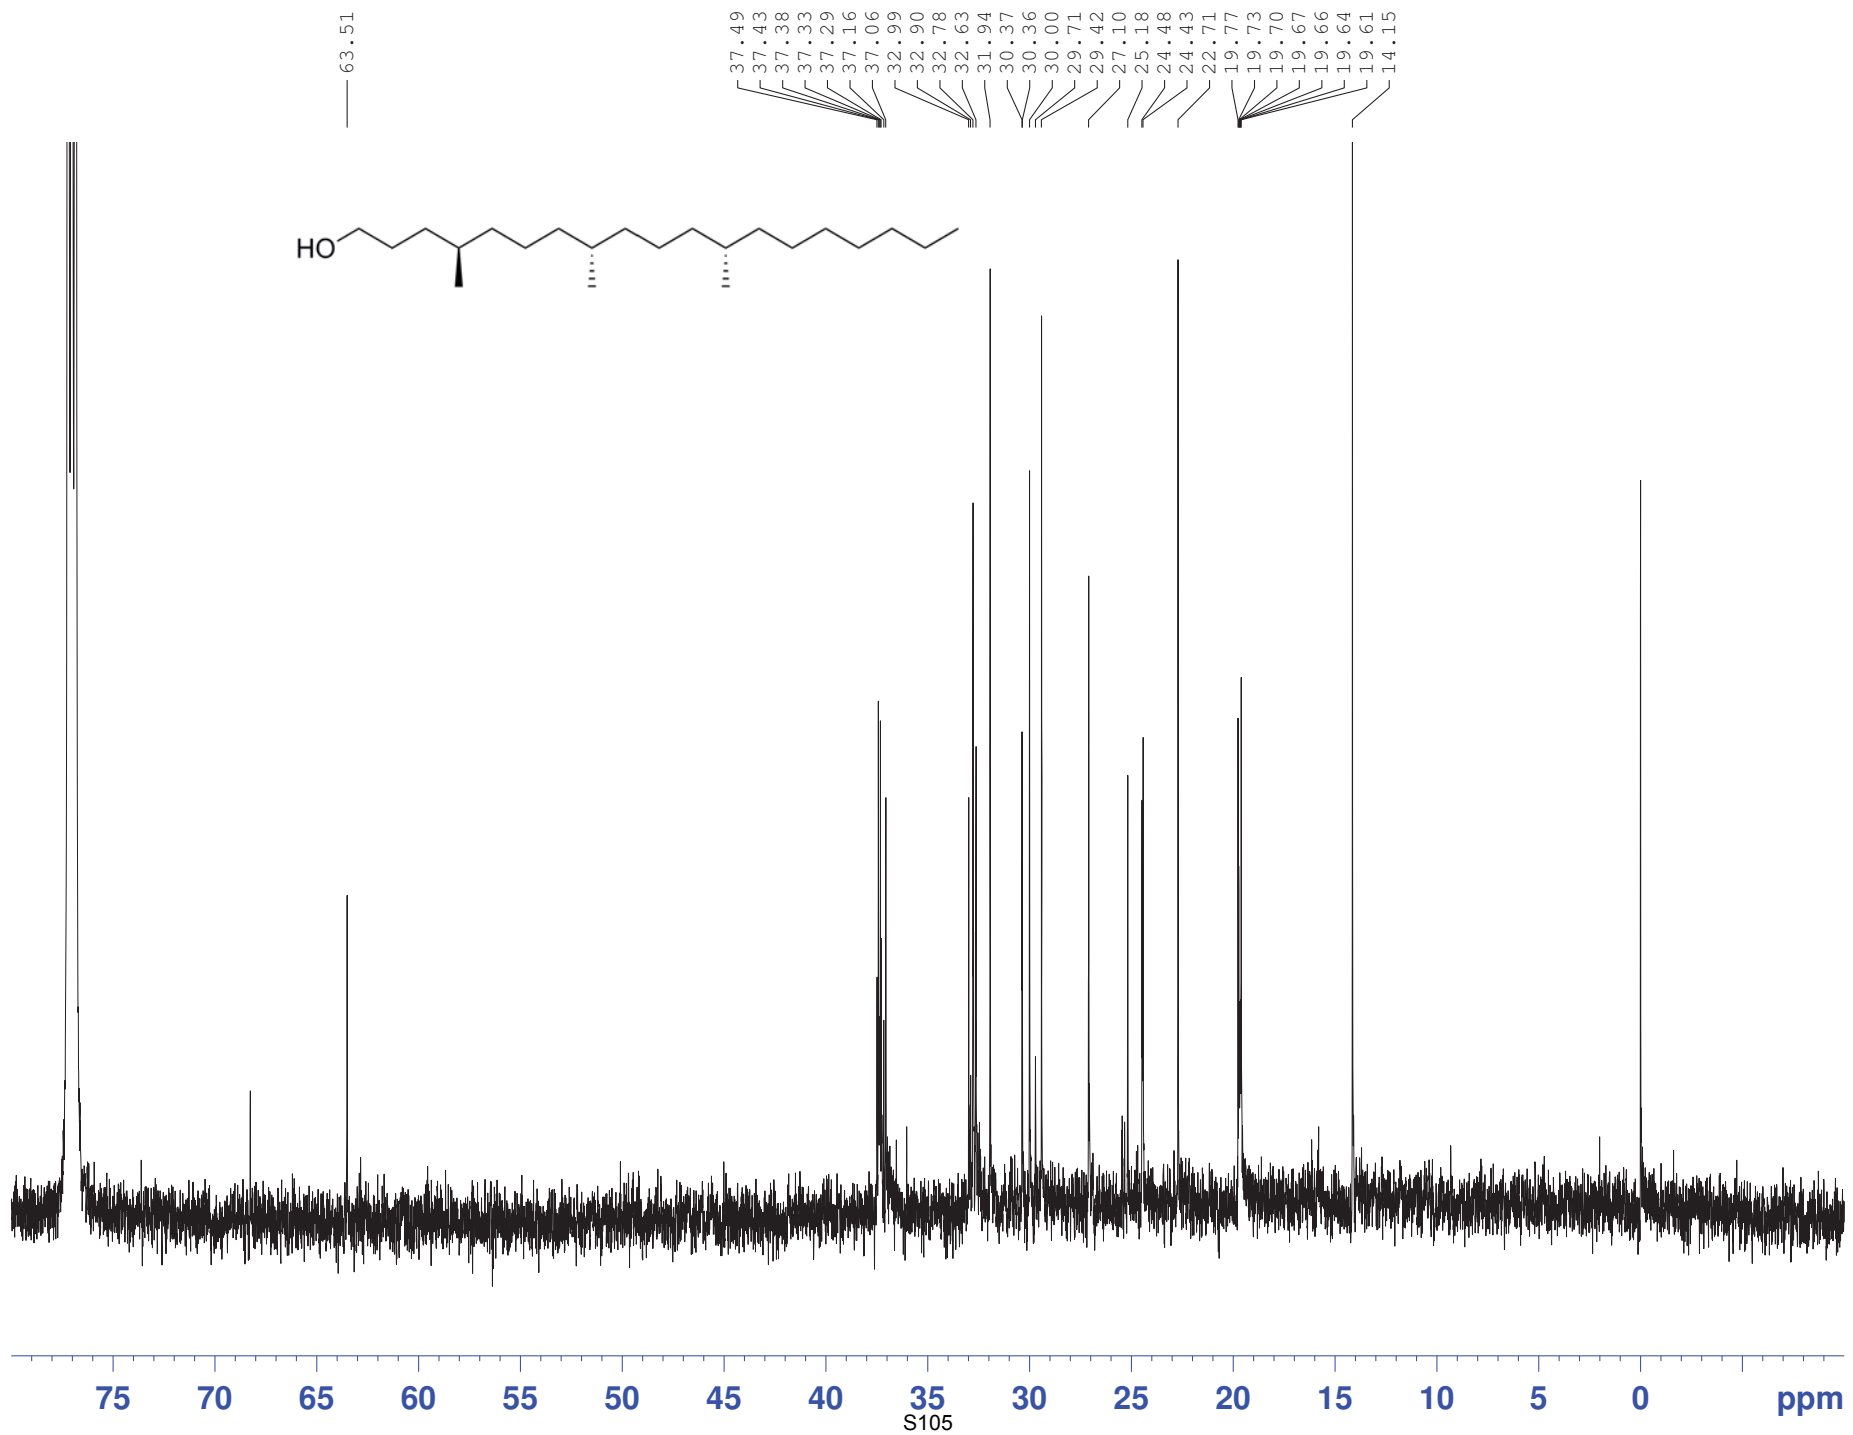

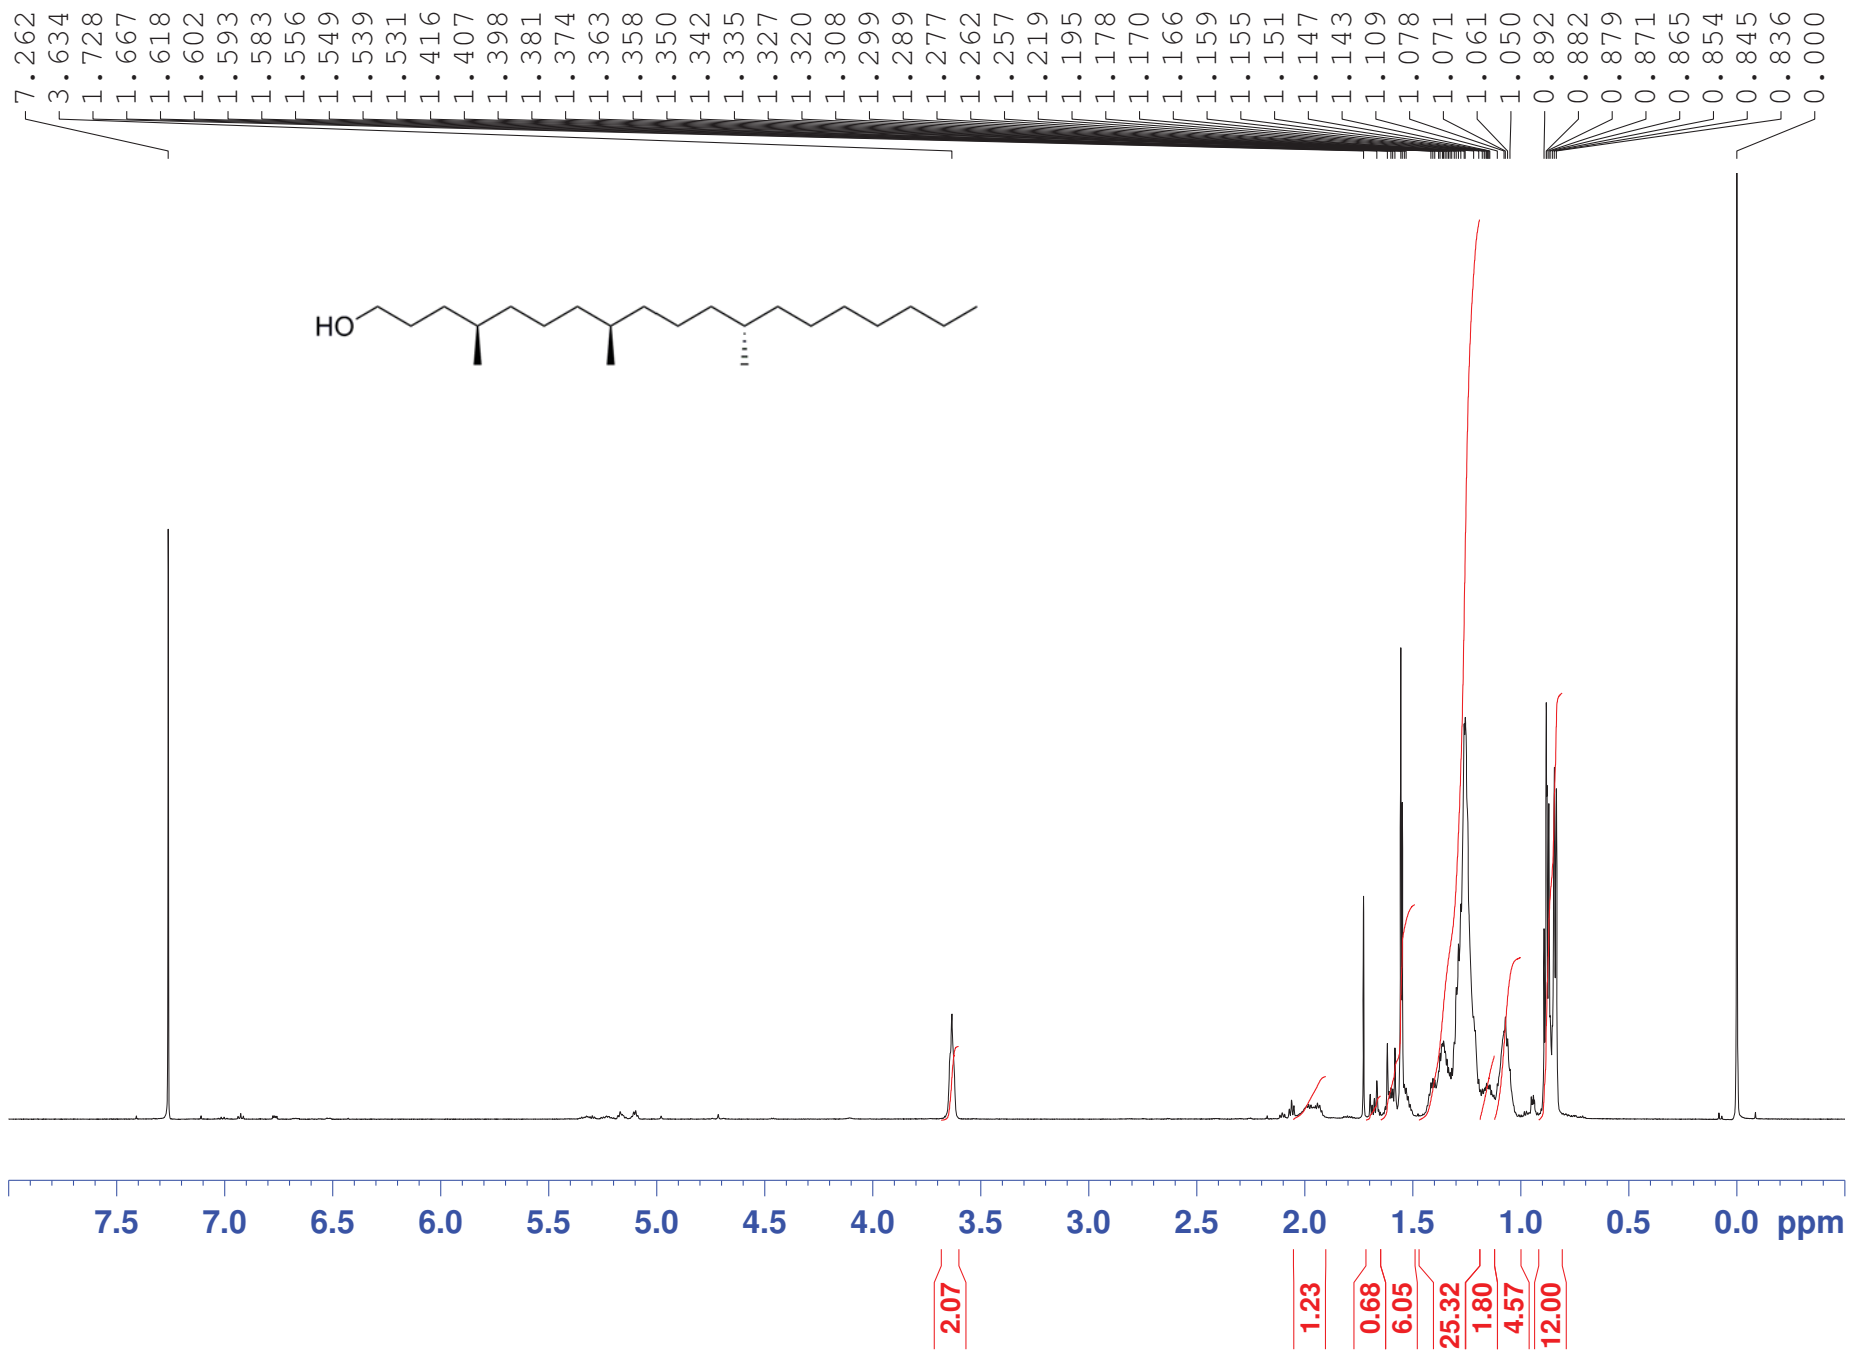

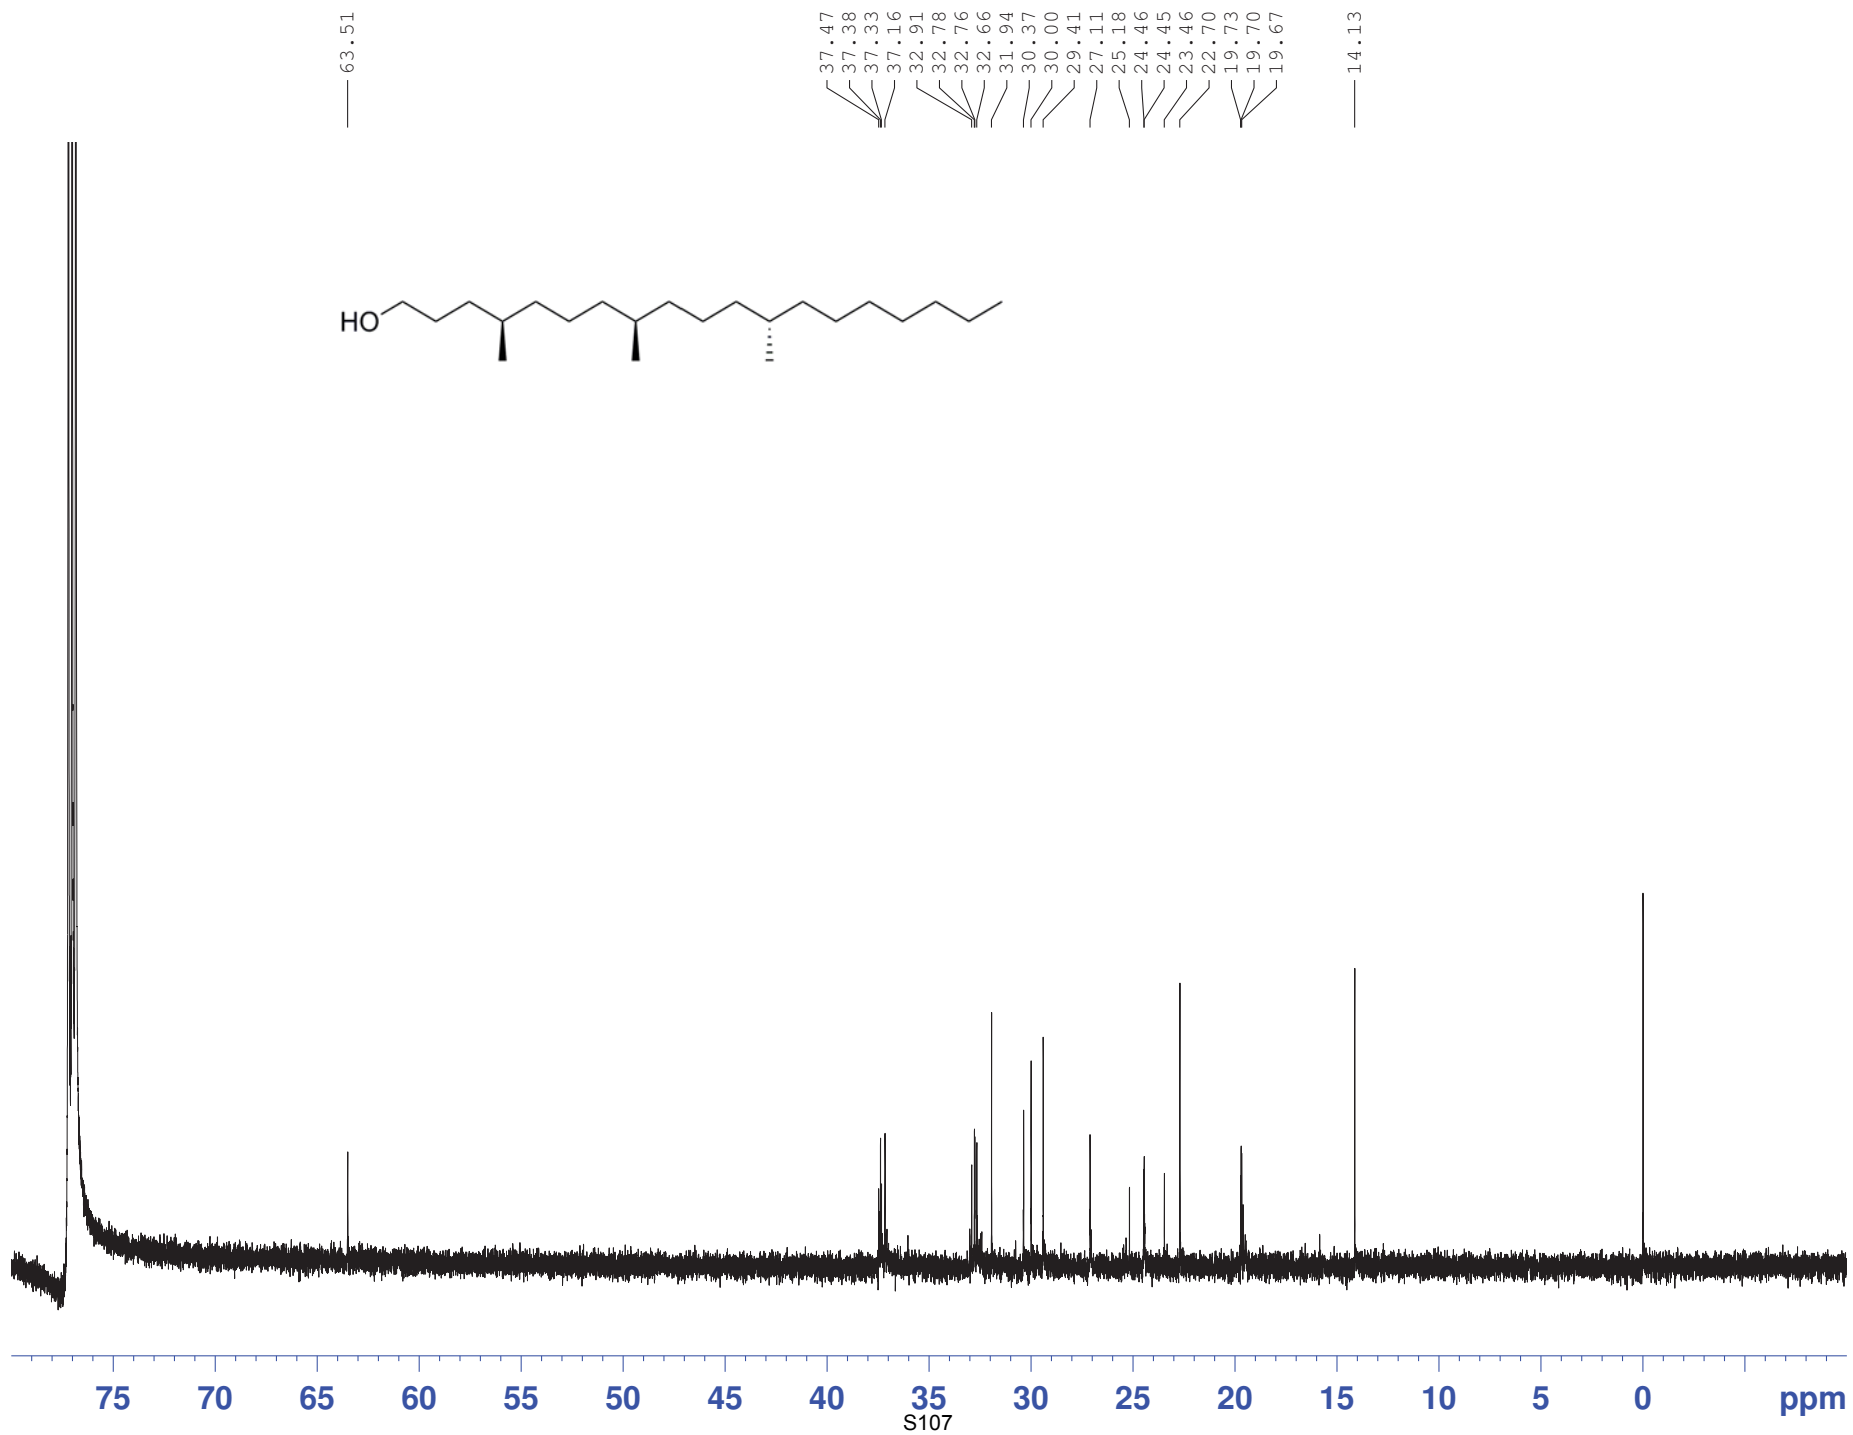

Supplement: NIHMS436128-supplement-1_si_001.pdf [file NIHMS436128-supplement-1_si_001.pdf]
